# Supplementary material for: Structural and Comparative Analyses of Insects Suggest the Presence of an Ultra-Conserved Regulatory Element of the Genes Encoding Vacuolar-Type ATPase Subunits and Assembly Factors
Source: MDPI journal article supplement (doi:10.3390/biology12081127), 2023-08-13

|                                     |                                                                                                         |
|-------------------------------------|---------------------------------------------------------------------------------------------------------|
| Gene Cluster ID                     | Atp6v1E                                                                                                 |
| <b>Drosophila melanogaster gene</b> | <b>Vha26 (CG1088)</b>                                                                                   |
| FlyBase ID                          | <a href="#">FBgn0015324</a>                                                                             |
| <b>Predicted function</b>           | <b>ATPase, H<sup>+</sup> transporting, lysosomal 31kDa, V1 subunit E</b>                                |
| Protein size                        | 226 amino acids                                                                                         |
| Cytogenetic map                     | 3R:83B4-83B4                                                                                            |
| Gene sequence location              | <a href="#">3R:1417453..1420429</a> [+]                                                                 |
| <b>Dmel CLEAR sequences</b>         | <b>TCATATGA; TCATGTGA; TCATGTGA; TCACACGA; TCATGTGA</b>                                                 |
| CLEAR sequence locations            | 3R:1417501..1417508; 3R:1417899..1417906; 3R:1418066..1418073; 3R:1418145..1418152; 3R:1418246..1418253 |

# FlyBase Vha26 (CG1088) gene model & CLEAR element (red) positions:

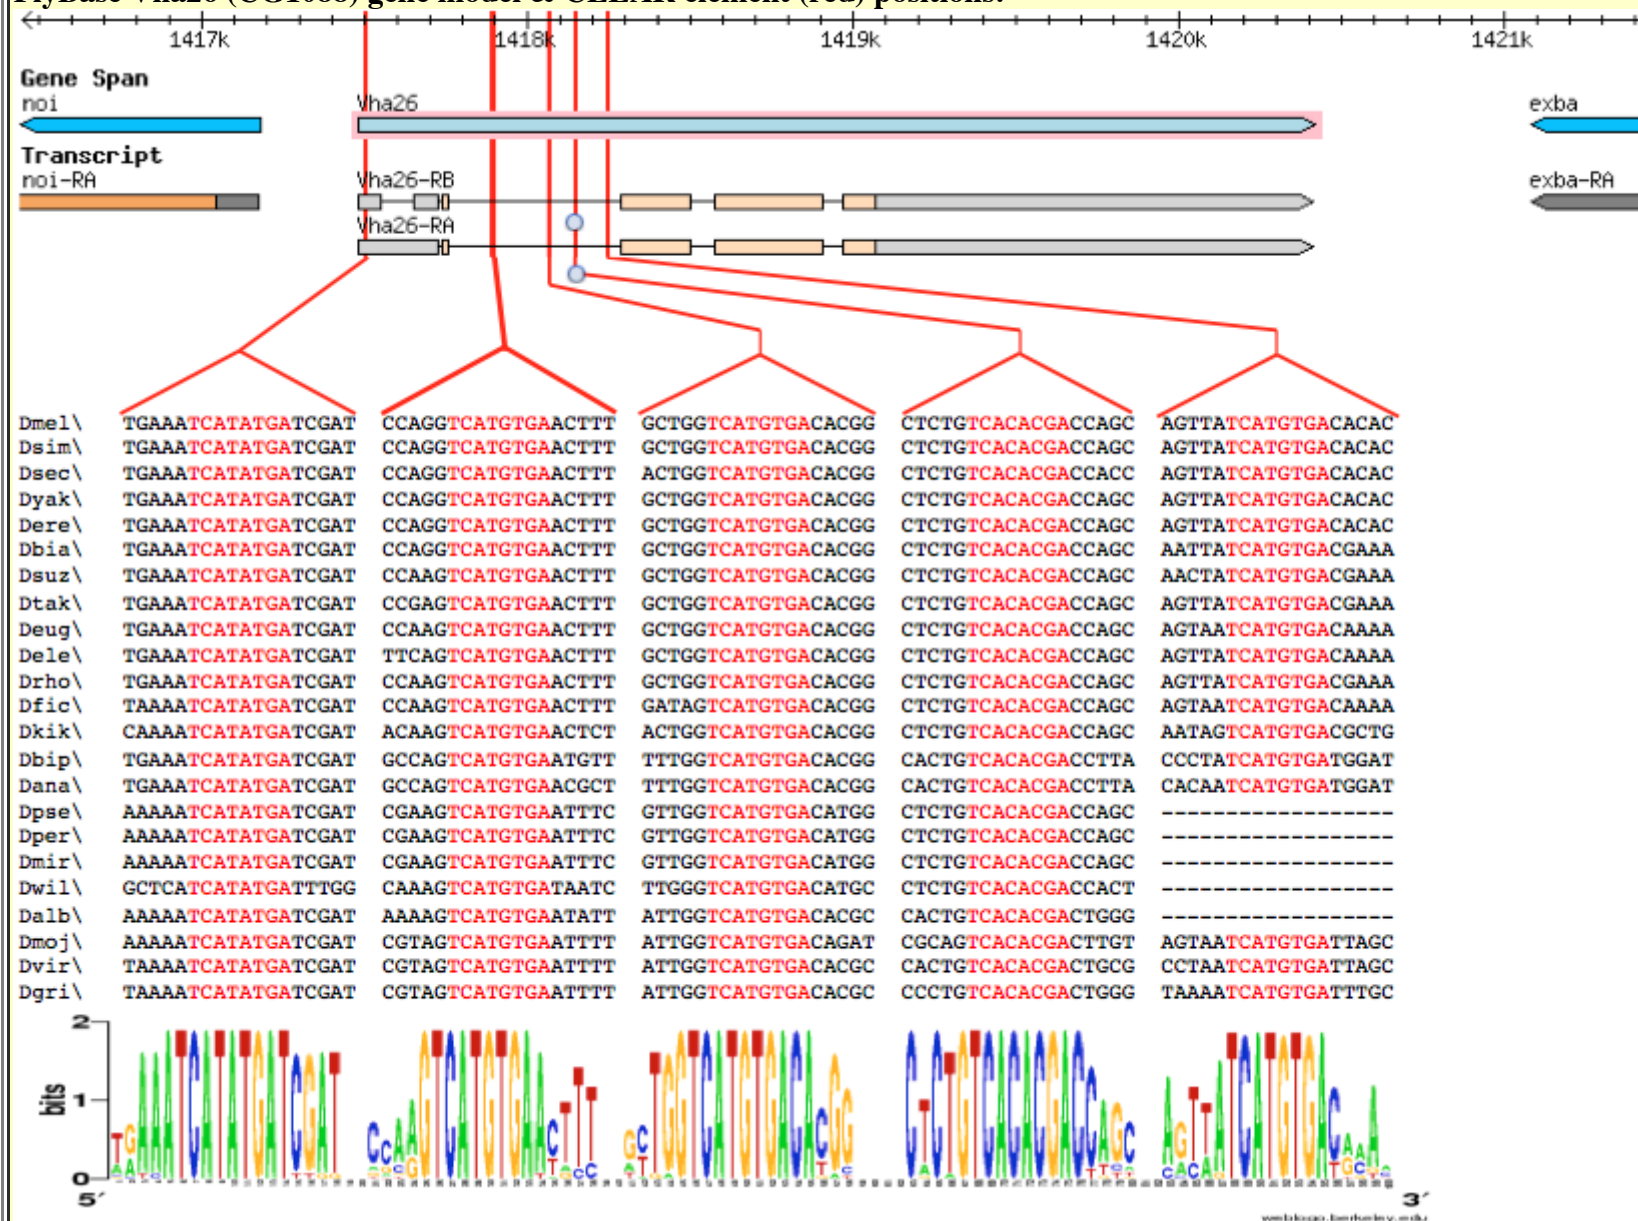

## Atp6v1E gene structure comparison:

Key: UTR region, CDS region

| Species                        | Vha26<br>Atp6v1E<br>orthologs | 5'exon | intron | exon | intron | exon | intron | exon3' | Extended CLEAR region | Position                                | bps<br>from<br>TSS      |
|--------------------------------|-------------------------------|--------|--------|------|--------|------|--------|--------|-----------------------|-----------------------------------------|-------------------------|
| <i>Drosophila_melanogaster</i> | <a href="#">Dmel\Vha26</a>    | 275    | 33     | 529  | 213    | 78   | 327    | 61     | 108 1353              | 5'UTR?<br>intron1<br>intron1<br>intron1 | 48<br>447<br>614<br>794 |
| <i>Drosophila_simulans</i>     | <a href="#">Dsim\GD19797</a>  |        | 33     | 514  | 213    | 76   | 327    | 61     | 108                   | 5'UTR?<br>intron1<br>intron1<br>intron1 |                         |
| <i>Drosophila_sechellia</i>    | <a href="#">Dsec\GM10818</a>  |        | 33     | 520  | 213    | 76   | 327    | 61     | 108                   | 5'UTR?<br>intron1<br>intron1<br>intron1 |                         |
| <i>Drosophila_yakuba</i>       | <a href="#">Dyak\GE10141</a>  |        | 33     | 499  | 213    | 69   | 327    | 61     | 108                   | 5'UTR?<br>intron1<br>intron1<br>intron1 |                         |
| <i>Drosophila_erecta</i>       | <a href="#">Dere\GG12936</a>  |        | 33     | 504  | 213    | 67   | 327    | 61     | 108                   | 5'UTR?<br>intron1<br>intron1<br>intron1 |                         |
| <i>Drosophila_biarmipes</i>    | <a href="#">Dbia\Vha26</a>    |        | 33     | 531  | 213    | 71   | 327    | 62     | 108                   | 5'UTR?<br>intron1<br>intron1<br>intron1 |                         |
| <i>Drosophila_suzukii</i>      | <a href="#">Dsuz\Vha26</a>    |        | 33     | 530  | 213    | 64   | 327    | 63     | 108                   | 5'UTR?<br>intron1<br>intron1<br>intron1 |                         |
| <i>Drosophila_takahashii</i>   | <a href="#">Dtak\Vha26</a>    |        | 33     | 521  | 213    | 65   | 327    | 61     | 108                   | 5'UTR?<br>intron1<br>intron1<br>intron1 |                         |
| <i>Drosophila_eugracilis</i>   | <a href="#">Deug\Vha26</a>    |        | 33     | 482  | 213    | 56   | 327    | 62     | 108                   | 5'UTR?<br>intron1<br>intron1<br>intron1 |                         |
| <i>Drosophila_elegans</i>      | <a href="#">Dele\Vha26</a>    |        | 33     | 517  | 213    | 66   | 327    | 62     | 108                   | 5'UTR?<br>intron1<br>intron1<br>intron1 |                         |
| <i>Drosophila_rhopaloea</i>    | <a href="#">Drho\Vha26</a>    |        | 33     | 516  | 213    | 74   | 327    | 62     | 108                   | 5'UTR?<br>intron1<br>intron1<br>intron1 |                         |

|                                 |                              |  |    |      |     |     |               |    |     |  |                                                                                                                                              |                                         |  |
|---------------------------------|------------------------------|--|----|------|-----|-----|---------------|----|-----|--|----------------------------------------------------------------------------------------------------------------------------------------------|-----------------------------------------|--|
| <i>Drosophila_ficusphila</i>    | <a href="#">Dfic\Vha26</a>   |  | 33 | 496  | 213 | 63  | 327           | 64 | 108 |  | cttcccgtaaaaTCATATGAtcgattgcagt<br>gggtcccccaagTCATGTGAacttttaccac<br>aatcgtgatagTCATGTGAcacggcccccg<br>ccaatgcagtaaTCATGTGAcaaaatgaggca     | 5'UTR?<br>intron1<br>intron1<br>intron1 |  |
| <i>Drosophila_kikkawai</i>      | <a href="#">Dkik\Vha26</a>   |  | 33 | 559  | 213 | 67  | 327           | 69 | 108 |  | ctcccccaaaaTCATATGAtcgatttgaaa<br>attgccacaagTCATGTGAactcttgetac<br>aatacgtactggTCATGTGAcacggccccgc<br>caaaggaaatagTCATGTGAcgctgtactaac      | 5'UTR?<br>intron1<br>intron1<br>intron1 |  |
| <i>Drosophila_bipectinata</i>   | <a href="#">Dbip\Vha26</a>   |  | 33 | 657  | 213 | 66  | 327           | 64 | 108 |  | cttcacctgaaaTCATATGAtcgattgcagt<br>cacaatagccagTCATGTGAatgtccccctc<br>attcaatttggTCATGTGAcacggccccgc<br>ctgaatgcctaTCATGTGAtggataaaggta      | 5'UTR?<br>intron1<br>intron1<br>intron1 |  |
| <i>Drosophila_ananassae</i>     | <a href="#">Dana\GF20699</a> |  | 33 | 638  | 213 | 58  | 327           | 70 | 108 |  | cttcacctgaaaTCATATGAtcgattgcagt<br>cacaatagccagTCATGTGAacgttccccct<br>attcatttggTCATGTGAcacggccccgc<br>ctgaatacacaTCATGTGAtggataatcga        | 5'UTR?<br>intron1<br>intron1<br>intron1 |  |
| <i>Drosophila_pseudoobscura</i> | <a href="#">Dpse\GA10614</a> |  | 33 | 590  | 213 | 67  | 327           | 64 | 108 |  | cacactgaaaaTCATATGAtcgattgcagt<br>aatgattcgaagTCATGTGAatttctcatggc<br>aattcgtgtggTCATGTGAcattgactccac                                        | 5'UTR?<br>intron1<br>intron1            |  |
| <i>Drosophila_persimilis</i>    | <a href="#">Dper\GL21540</a> |  | 33 | 591  | 213 | 67  | 327           | 64 | 108 |  | cacactgaaaaTCATATGAtcgattgcagt<br>aatgattcgaagTCATGTGAatttctcatggc<br>aattcgtgtggTCATGTGAcattgactccac                                        | 5'UTR?<br>intron1<br>intron1            |  |
| <i>Drosophila_miranda</i>       | <a href="#">Dmir\Vha26</a>   |  | 33 | 589  | 213 | 67  | 327           | 64 | 108 |  | cacactaaaaaTCATATGAtcgattgctgt<br>aatgattcgaagTCATGTGAatttctcatggc<br>aattcgtgtggTCATGTGAcattgactccac                                        | 5'UTR?<br>intron1<br>intron1            |  |
| <i>Drosophila_willistoni</i>    | <a href="#">Dwil\GK22511</a> |  | 33 | 652  | 213 | 76  | 435 (327+108) |    |     |  | attgtgggctcaTCATATGAtttggccagtga<br>aaattgcгааagTCATGTGAaattcattagcg<br>attcgtattggTCATGTGAcattgctcccca                                      | 5'UTR?<br>intron1<br>intron1            |  |
| <i>Drosophila_albomicans</i>    | <a href="#">Dalb\Vha26</a>   |  | 33 | >725 | 213 | 351 | 327           | 70 | 108 |  | acgaggtaaaaaTCATATGAtcgattgtggt<br>gcgagtgaааagTCATGTGAaattactcgca<br>aatacttattggTCATGTGAcacgcactacac                                       | 5'UTR?<br>intron1<br>intron1            |  |
| <i>Drosophila_mojavensis</i>    | <a href="#">Dmoj\GI23674</a> |  | 33 | 704  | 213 | 57  | 327           | 63 | 108 |  | acgaagtaaaaaTCATATGAtcgattagtcgt<br>ttctgccgtagTCATGTGAattttgcgtaca<br>aaagcttattggTCATGTGAcagatattacat<br>agataaagtaaTCATGTGAttagctttgagg   | 5'UTR?<br>intron1<br>intron1<br>intron1 |  |
| <i>Drosophila_virilis</i>       | <a href="#">Dvir\GJ23234</a> |  | 33 | 730  | 213 | 94  | 327           | 62 | 108 |  | cacgaagtaaaaaTCATATGAtcgattggagg<br>ttctcatcgtagTCATGTGAattttgcgtgca<br>aatgcttattggTCATGTGAcacgcactacac<br>ataggctcctaaTCATGTGAttagctttagg  | 5'UTR?<br>intron1<br>intron1<br>intron1 |  |
| <i>Drosophila_grimshawi</i>     | <a href="#">Dgri\GH14669</a> |  | 33 | 765  | 213 | 71  | 327           | 72 | 108 |  | cacgaagtaaaaaTCATATGAtcgattgtggt<br>ttctcccgtagTCATGTGAatttttagcatgc<br>attgcttattggTCATGTGAcacgcactagac<br>gagcaactaaaaTCATGTGAtttgcttaagag | 5'UTR?<br>intron1<br>intron1<br>intron1 |  |

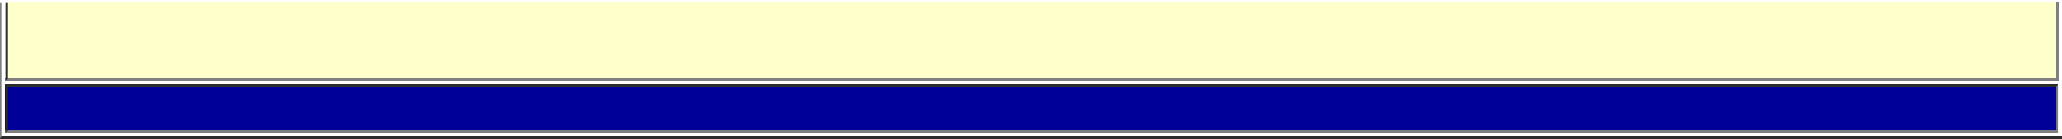

Supplement: s1 [file s1]
