# Supplementary material for: Structural and Comparative Analyses of Insects Suggest the Presence of an Ultra-Conserved Regulatory Element of the Genes Encoding Vacuolar-Type ATPase Subunits and Assembly Factors
Source: MDPI journal article supplement (doi:10.3390/biology12081127), 2023-08-13

| Gene Cluster ID                                                | Atp6v1C                                                                  |
|----------------------------------------------------------------|--------------------------------------------------------------------------|
| <b>Drosophila melanogaster gene</b>                            | <b>Vha44 (CG8048)</b>                                                    |
| FlyBase ID                                                     | <a href="#">FBgn0262511</a>                                              |
| <b>Predicted function</b>                                      | <b>ATPase, H<sup>+</sup> transporting, lysosomal 42kDa, V1 subunit C</b> |
| Protein size                                                   | 388 amino acids (PA)                                                     |
| Cytogenetic map                                                | 2R:53B5-53C1                                                             |
| Gene sequence location                                         | <a href="#">2R:12212318..12224142</a> [-]                                |
| <b>Dmel CLEAR sequence</b>                                     | <b>TCACGTGA; TCATGTGA</b>                                                |
| CLEAR sequence location                                        | 2R:12224183..12224190; 2R:12223570..12223577                             |
| <b>FlyBase gene model &amp; CLEAR element (red) positions:</b> |                                                                          |

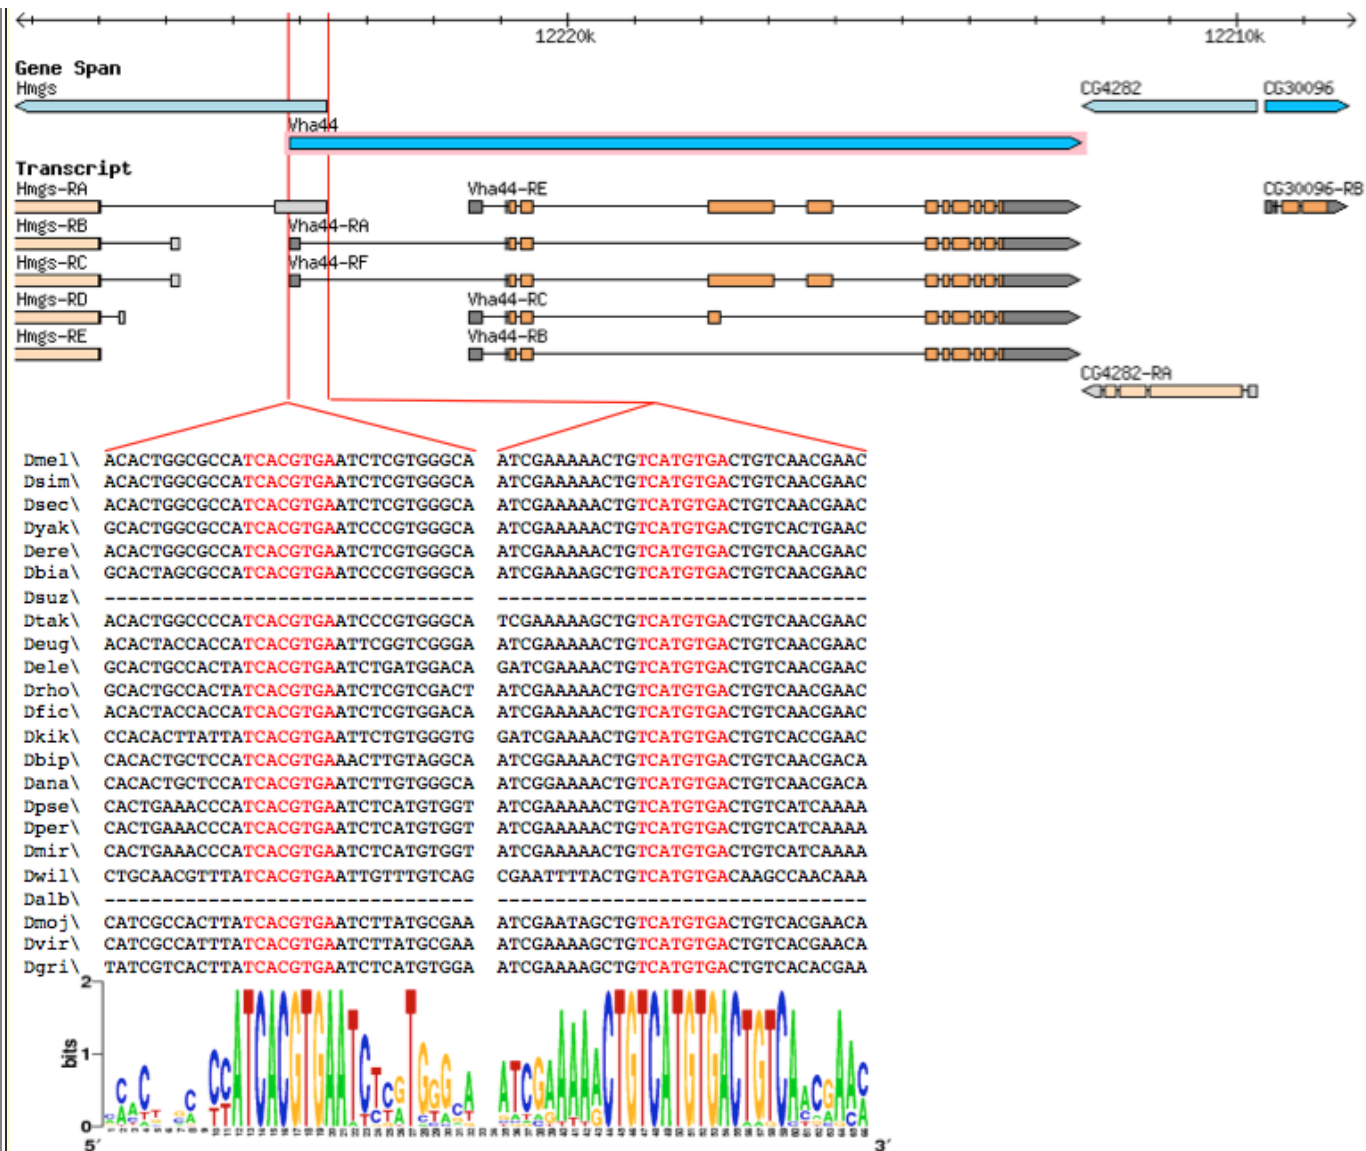

### Atp6v1C (Vha44-RA) gene structure comparison:

Key: **UTR region**, **CDS region**

| Species                 | Vha44-RA (Atp6v1C) orthologs | 5'exon | intron | exon | intron | exon3' | Extended CLEAR region | Position | bps from TSS |         |
|-------------------------|------------------------------|--------|--------|------|--------|------|--------|------|--------|------|--------|------|--------|------|--------|------|--------|--------|-----------------------|----------|--------------|---------|
| Drosophila_melanogaster | <a href="#">DmelVha44</a>    | 148    | 3069   | 8    | 135    | 90   | 154    | 5873 | 187    | 64   | 99     | 62   | 256    | 62   | 98     | 59   | 139    | 70     | 99                    | 1153     | 5' intron1   | -40 565 |

|                                 |                               |    |    |  |     |     |     |      |     |     |     |     |     |    |     |     |     |    |    |    |                                                                        |                |  |
|---------------------------------|-------------------------------|----|----|--|-----|-----|-----|------|-----|-----|-----|-----|-----|----|-----|-----|-----|----|----|----|------------------------------------------------------------------------|----------------|--|
| <i>Drosophila_simulans</i>      | <a href="#">Dsim\GD25545</a>  | ND | ND |  | 135 | 77  | 154 | 5099 | 187 | 58  | 99  | 63  | 256 | 62 | 98  | 59  | 139 | 67 | 99 | ND | acactggcgccaTCACGTGAatctctgtggga<br>atcgaaaaactgTCATGTGActgtcaacgaac   | 5'<br>intron1? |  |
| <i>Drosophila_sechellia</i>     | <a href="#">Dsec\GM20063</a>  | ND | ND |  | 135 | 85  | 154 | 4304 | 187 | 63  | 99  | 62  | 256 | 63 | 98  | 59  | 139 | 67 | 99 | ND | acactggcgccaTCACGTGAatctctgtggga<br>atcgaaaaactgTCATGTGActgtcaacgaac   | 5'<br>intron1? |  |
| <i>Drosophila_yakuba</i>        | <a href="#">Dyak\GE14069*</a> | ND | ND |  | 135 | 64  | 154 | 5734 | 187 | 64  | 99  | 62  | 256 | 62 | 98  | 62  | 139 | 67 | 99 | ND | gcactggcgccaTCACGTGAatccgtgtggga<br>atcgaaaaactgTCATGTGActgtcaacgaac   | 5'<br>intron1? |  |
| <i>Drosophila_erecta</i>        | <a href="#">Dere\GG22273</a>  | ND | ND |  | 135 | 86  | 154 | 5862 | 187 | 64  | 99  | 60  | 256 | 62 | 98  | 60  | 139 | 67 | 99 | ND | acactggcgccaTCACGTGAatctctgtggga<br>atcgaaaaactgTCATGTGActgtcaacgaac   | 5'<br>intron1? |  |
| <i>Drosophila_biarmipes</i>     | <a href="#">Dbia\Vha44</a>    | ND | ND |  | 135 | 75  | 154 | 5801 | 187 | 465 | 99  | 60  | 256 | 62 | 98  | 60  | 139 | 65 | 99 | ND | gcactagcgccaTCACGTGAatccgtgtggga<br>atcgaaaaactgTCATGTGActgtcaacgaac   | 5'<br>intron1? |  |
| <i>Drosophila_suzukii</i>       | <a href="#">Dsuz\Vha44</a>    | ND | ND |  | 135 | 118 | 154 | ND   | ND  | ND  | 99? | 60  | 256 | 61 | 98  | 63  | 139 | ND | 99 | ND | ND                                                                     |                |  |
| <i>Drosophila_takahashii</i>    | <a href="#">Dtak\Vha44</a>    | ND | ND |  | 135 | 344 | 154 | 5616 | 187 | 579 | 99  | 61  | 256 | 62 | 98  | 62  | 139 | 63 | 99 | ND | acactggccccaTCACGTGAatccgtgtggga<br>tcgaaaaactgTCATGTGActgtcaacgaac    | 5'<br>intron1? |  |
| <i>Drosophila_eugracilis</i>    | <a href="#">Deug\Vha44</a>    | ND | ND |  | 135 | 110 | 154 | 5912 | 187 | 60  | 99  | 59  | 256 | 62 | 98  | 61  | 139 | 67 | 99 | ND | acactaccaccaTCACGTGAatctgtgtggga<br>atcgaaaaactgTCATGTGActgtcaacgaac   | 5'<br>intron1? |  |
| <i>Drosophila_elegans</i>       | <a href="#">Dele\Vha44</a>    | ND | ND |  | 135 | 137 | 154 | 6020 | 187 | 77  | 99  | 74  | 256 | 70 | 98  | 68  | 139 | 70 | 99 | ND | gcactgccactaTCACGTGAatctgtatggaca<br>gatcgaaaaactgTCATGTGActgtcaacgaac | 5'<br>intron1? |  |
| <i>Drosophila_rhopaloea</i>     | <a href="#">Drho\Vha44</a>    | ND | ND |  | 135 | 181 | 154 | 5622 | 187 | 68  | 99  | 60  | 256 | 62 | 98  | 64  | 139 | 65 | 99 | ND | gcactgccactaTCACGTGAatctgtctgact<br>atcgaaaaactgTCATGTGActgtcaacgaac   | 5'<br>intron1? |  |
| <i>Drosophila_ficusphila</i>    | <a href="#">Dfic\Vha44</a>    | ND | ND |  | 135 | 134 | 154 | 5711 | 187 | 59  | 99  | 62  | 256 | 62 | 98  | 61  | 139 | 68 | 99 | ND | acactaccaccaTCACGTGAatctgtgtggaca<br>atcgaaaaactgTCATGTGActgtcaacgaac  | 5'<br>intron1? |  |
| <i>Drosophila_kikkawai</i>      | <a href="#">Dkik\Vha44</a>    | ND | ND |  | 135 | 57  | 154 | 5890 | 187 | 67  | 99  | 64  | 256 | 66 | 98  | 65  | 139 | 74 | 99 | ND | ccacacttattaTCACGTGAatctgtgtgtgtg<br>gatcgaaaaactgTCATGTGActgtcaccgaac | 5'<br>intron1? |  |
| <i>Drosophila_bipectinata</i>   | <a href="#">Dbip\Vha44</a>    | ND | ND |  | 135 | 131 | 154 | 5782 | 187 | 62  | 99  | 60  | 256 | 61 | 98  | 63  | 139 | 58 | 99 | ND | cacactgtctccaTCACGTGAaactgttaggaca<br>atcgaaaaactgTCATGTGActgtcaacgaca | 5'<br>intron1? |  |
| <i>Drosophila_ananassae</i>     | <a href="#">Dana\GF11269</a>  | ND | ND |  | 135 | 60  | 154 | 4919 | 187 | 61  | 99  | 65  | 256 | 59 | 98  | 61  | 139 | 63 | 99 | ND | cacactgtctccaTCACGTGAatctgtgtggga<br>atcgaaaaactgTCATGTGActgtcaacgaca  | 5'<br>intron1? |  |
| <i>Drosophila_pseudoobscura</i> | <a href="#">Dpse\GA20788</a>  | ND | ND |  | 135 | 61  | 154 | 5678 | 187 | 72  | 99  | 71  | 256 | 67 | 98  | 66  | 139 | 67 | 99 | ND | cactgaaaccaTCACGTGAatctcatgtgtg<br>atcgaaaaactgTCATGTGActgtcatcaaaa    | 5'<br>intron1? |  |
| <i>Drosophila_persimilis</i>    | <a href="#">Dper\GL11349</a>  | ND | ND |  | 135 | 61  | 154 | 6037 | 187 | 72  | 99  | 71  | 256 | 67 | 98  | 66  | 139 | 67 | 99 | ND | cactgaaaccaTCACGTGAatctcatgtgtg<br>atcgaaaaactgTCATGTGActgtcatcaaaa    | 5'<br>intron1? |  |
| <i>Drosophila_miranda</i>       | <a href="#">Dmir\Vha44</a>    | ND | ND |  | 135 | 61  | 154 | 5925 | 187 | 72  | 99  | 71  | 256 | 67 | 98  | 66  | 139 | 67 | 99 | ND | cactgaaaccaTCACGTGAatctcatgtgtg<br>atcgaaaaactgTCATGTGActgtcatcaaaa    | 5'<br>intron1? |  |
| <i>Drosophila_willistoni</i>    | <a href="#">Dwil\GK21692</a>  | ND | ND |  | 135 | 65  | 154 | 8442 | 187 | 76  | 99  | 58  | 256 | 75 | 237 |     |     | 70 | 99 | ND | ctgcaactgtttaTCACGTGAatgtttgtcag<br>cgaattttactgTCATGTGAcaagccaacaaa   | 5'<br>intron1? |  |
| <i>Drosophila_albomicans</i>    | <a href="#">Dalb\Vha44</a>    | ND | ND |  | 132 | 68  | 154 | 6951 | 187 | 97  | 99  | 71  | 256 | 71 | 98  | 85  | 139 | 65 | 99 | ND | ND                                                                     |                |  |
| <i>Drosophila_mojavensi</i>     | <a href="#">Dmoj\GI19629</a>  | ND | ND |  | 132 | 63  | 154 | 6772 | 187 | 77  | 99  | 77  | 256 | 63 | 98  | 268 | 139 | 58 | 99 | ND | catcgccactaTCACGTGAatcttatcgaa<br>atcgaatagctgTCATGTGActgtcacaacaa     | 5'<br>intron1? |  |
| <i>Drosophila_virilis</i>       | <a href="#">Dvir\GJ14996</a>  | ND | ND |  | 135 | 65  | 154 | 6765 | 187 | 63  | 99  | 137 | 256 | 62 | 98  | 62  | 139 | 56 | 99 | ND | catcgccatttaTCACGTGAatcttatcgaa<br>atcgaaaactgTCATGTGActgtcacaacaa     | 5'<br>intron1? |  |
| <i>Drosophila_grimshawi</i>     | <a href="#">Dgri\GH21923</a>  | ND | ND |  | 135 | 70  | 154 | 6549 | 187 | 84  | 99  | 103 | 256 | 75 | 98  | 61  | 142 | 63 | 99 | ND | tatgtcacttaTCACGTGAatctcatgtgga<br>atcgaaaactgTCATGTGActgtcacacgaa     | 5'<br>intron1? |  |

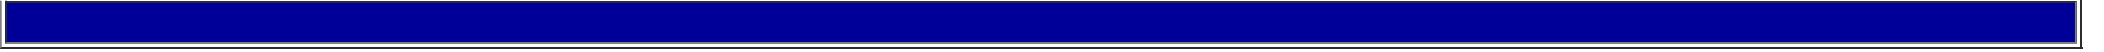

Supplement: s1 [file s1]
