# Supplementary material for: Structural and Comparative Analyses of Insects Suggest the Presence of an Ultra-Conserved Regulatory Element of the Genes Encoding Vacuolar-Type ATPase Subunits and Assembly Factors
Source: MDPI journal article supplement (doi:10.3390/biology12081127), 2023-08-13

| Gene Cluster ID                     | Atp6v1G                                                  |
|-------------------------------------|----------------------------------------------------------|
| <b>Drosophila melanogaster gene</b> | <b>Vha13 (CG6213)</b>                                    |
| FlyBase ID                          | <a href="#">FBgn0026753</a>                              |
| Predicted function                  | V-type ATPase, H <sup>+</sup> transporting, V1 subunit G |

#### Atp6v1G CLEAR element conservation:

|                | <u>5' / 5' UTR</u>                                            | <u>intron1</u>                                             |
|----------------|---------------------------------------------------------------|------------------------------------------------------------|
| Dmel\Vha13     | TGTG <b>T</b> GACTTCG <b>T</b> TCATATGACATTTTACAGT            | GTGTGTGTGGG <b>T</b> CACATGATGTGGTGGAAAA                   |
| Mdom\Atp6v1G   | TCCAAAGCAATG <b>T</b> TCATATGACATTTTTCGTTT                    | GCTATGGTGGGG <b>T</b> CACATGATAACCGAGCTTA                  |
| Ccap\Atp6v1G-1 | TAGGTGGTTTTT <b>T</b> CATG <b>T</b> GACTGCGTTTGTCA            | CAACCCATCGGG <b>T</b> CA <b>T</b> GT <b>G</b> TAAGCAAAAATT |
| Gmor\Atp6v1G   | TTTC <b>T</b> GTCTAT <b>G</b> TCATATGACATTTACAATCC            | AGTCCACAAGAG <b>T</b> CACATGATAAGATTATAGT                  |
| Llon\Atp6v1G   | CGAAGTTGGGAG <b>T</b> CACATGATTTCTCTTATCG                     | AAATACTGTGAG <b>T</b> CACATGACGATTGTAATAA                  |
| Ppap\Atp6v1G-1 | TTCAACGG <b>T</b> TGA <b>T</b> CACATGATTTCTCTTATCG            | GGGAATACTGAG <b>T</b> CACATGACGATGGTGATGA                  |
| Agam\Atp6v1G-1 | ACCCGGGGG <b>T</b> TGTCATATGATCAGCGAAGAAA                     | ACACCACTCCGGTCACATGACCCACCTGTTTG                           |
| Aara\Atp6v1G-1 | ACCCGGGGG <b>T</b> TGTCATATGATCAGCGAAGAAA                     | ACACCACTCCGGTCACATGACCCACCTGTTTG                           |
| Aqan\Atp6v1G-1 | ACCCGGGGG <b>T</b> TGTCATATGATCAGCGAAGAAA                     | ACACCACTCCGGTCACATGACCCACCTGTTTG                           |
| Achr\Atp6v1G-1 | AGTGGAGGG <b>T</b> TGTCATATGATCAACGATGAAA                     | ACTGACGGACGGTCACATGACCCACCTGTTGT                           |
| Aepi\Atp6v1G-1 | GGAAAGGGG <b>A</b> TTGT <b>C</b> ATATGATCAACGA <b>A</b> AAAA  | ACGCAGCTCCGGTCACATGACCAACCTGTTGT                           |
| Amin\Atp6v1G-1 | AAAAGGGGG <b>T</b> TGTCATATGATCAAA <b>G</b> AAAAA             | ACGTAACCTTGGTCACATGACCAACCTGTTGT                           |
| Afun\Atp6v1G-1 | AAAAGGGGG <b>T</b> TGTCATATGATCAAA <b>G</b> AAAAA             | ACGTAACCTTGGTCACATGACCAACCTGTTGT                           |
| Aste\Atp6v1G-1 | CAAAGTGGG <b>T</b> TGTCATATGATCAAT <b>G</b> AAAAA             | CGTAACCTTTGGTCACATGACCCACCTGTTGT                           |
| Adir\Atp6v1G-1 | AACGAGGGG <b>T</b> GGTCATATGATCTCG <b>G</b> AAAGAA            | CGTAACGCACGGTCACATGACCCACCTGTTGT                           |
| Anil\Atp6v1G-1 | TTGCAGGGTTT <b>G</b> TCATATGATCAAA <b>T</b> TTGAAA            | GTAACCACGGGGTCACATGACCCGCTGATGTG                           |
| Aalb\Atp6v1G-1 | GAAACATCG <b>T</b> AGTCATATGATTGAGGGGTCGG                     | GACTGTGGCTGGTCACATGACCCCTCTCTGCT                           |
| Adar\Atp6v1G-1 | TACGAGCG <b>T</b> AGGT <b>C</b> ATATGATTTGTGGGTCGG            | ACTGTGAATGGGT <b>C</b> ACATGACCCCTCTCTTCG                  |
| Aaeg\Atp6v1G-1 | CAACGATTTCAG <b>T</b> CATATGATCCGTCCTATAT                     | AGTGTACGGTAG <b>T</b> CACATGACCCATTGGACTA                  |
| Cqui\Atp6v1G-1 | CAAGTGT <b>C</b> AGAG <b>T</b> CATATGATGCTCGCG <b>C</b> ACA   | CGCGCACGGTAG <b>T</b> CACATGACTACTGCTGCT                   |
| Mdes\Atp6v1G-1 | ATTTT <b>T</b> TAT <b>T</b> GGAT <b>T</b> CATATGATCCGAAATGAAA | TATACAAAGCGG <b>T</b> CACATGACTACATGATTGG                  |
| Bmor\Atp6v1G   | TAACTAAT <b>T</b> AAA <b>T</b> CATATGACTTTCGTCACGA            | AATCCATGGTCG <b>T</b> CACATGATTTAATTCAAAT                  |
| Msex\Atp6v1G   | GAACTAATGTAA <b>T</b> CATATGACTTTCGTCACGA                     | GGTCTTTTATCA <b>T</b> CACATGATTGCTTTCATAT                  |
| Dple\Atp6v1G   | GAACTAAACCAA <b>T</b> CATATGACTATTTTCGTCA                     | -----                                                      |
| Hmel\Atp6v1G   | GAACTAAACCAA <b>T</b> CATATGACTTACTTTTCGT                     | TTACTTTTCTTA <b>T</b> CACATGATATATCTTAAGA                  |
| Pxyl\Atp6v1G   | GAGATAAACTAA <b>T</b> CATATGACTTTCGTCACAT                     |                                                            |
| Tcas\Atp6v1G-1 | CCCAACTAGCGA <b>T</b> CATATGACATTTGCCTCAA                     |                                                            |
| Dpon\Atp6v1G-1 | ATCGATTGGAAG <b>T</b> CATATGACTGTCACTGGGT                     |                                                            |
| Amel\Atp6v1G   | GAAACTCTAAAG <b>T</b> CATATGATCGATT <b>T</b> GCGAT            |                                                            |
| Aflo\Atp6v1G   | GAAACTCTAAAG <b>T</b> CATATGATCGATT <b>T</b> GCGAT            |                                                            |
| Bter\Atp6v1G   | AAAGTCATATGA <b>T</b> CATATGATCGATT <b>T</b> GCGAT            |                                                            |
| Bimp\Atp6v1G   | AAAGTCATATGA <b>T</b> CATATGATCGATT <b>T</b> GCGAT            |                                                            |
| Mrot\Atp6v1G   | GAAACTCCAAAG <b>T</b> CATATGATCGATT <b>T</b> GTAAT            |                                                            |

Aech\Atp6v1G    GAAGCTCCAAAGTCATATGATCGATTTCGTGAC  
 Acep\Atp6v1G    GAAGCTCCAAAGTCATATGATCGATTTCGTGAC  
 Pbar\Atp6v1G    GAAGCTCCAAAGTCATATGATCGATTTCGTGAC  
 Hsal\Atp6v1G    GAAGCTCCAAAGTCATATGATCGATTTCGTGAT  
 Cflo\Atp6v1G    GAAGCTCCAAAGTCATATGATCGATTTCGTGAT  
 Sinv\Atp6v1G    GAAGCTCTAAAGTCATATGATCGATTTCGTGAC  
 Lhum\Atp6v1G    GAAGCGCCAAAGTCATATGATCGATTTCATGAT  
 Ngir\Atp6v1G    GAGGTGCCTTGATCATATGATCGACTTTTCAG  
 Nlon\Atp6v1G    GAGGTGCCTTGATCATATGATCGATTTCAG  
 Nvit\Atp6v1G    GAGGTGCCTTGATCATATGATCGATTTCAG  
  
 Phum\Atp6v1G    TGCTTGTTACTGTCACGAGATCGATAAGAATT  
 Lful\Atp6v1G    TCCTGTGTCTTGTCATGTGATCGATCTGTAAC  
 Dpul\Atp6v1G    TGGCTCCAGCAGTCATATGACAGGAAGTCACA  
 Isca\Atp6v1G    GTAGGTCGCCGATCACCTGACTGCGGCAGTGT

## Atp6v1G gene structure comparison:

Key: UTR region, CDS region

| Order                      | Species                        | Atp6v1G orthologs                             | 5'exon |    | intron | exon | intron | exon            | intron | exon3' | Extended CLEAR region                                                                               | Position            | bps from TSS           |
|----------------------------|--------------------------------|-----------------------------------------------|--------|----|--------|------|--------|-----------------|--------|--------|-----------------------------------------------------------------------------------------------------|---------------------|------------------------|
| Diptera<br>(Drosophilidae) | <i>Drosophila_melanogaster</i> | <a href="#">Dmel\Vha13</a>                    | 117    | 82 | 367    | 101  | 59     | 171             |        | 250    | tgtgtgactcgTCATATGAcatttttacagt<br>gttggtgtgggTCACATGAtgtgtggaaaa                                   | 5'UTR<br>intron1    | 9<br>317               |
| Diptera<br>(Muscidae)      | <i>Musca_domestica</i>         | <a href="#">Mdom\Atp6v1G</a>                  |        | 82 | 259    | 101  | 3128   | 174             |        |        | tccaaagcaatgTCATATGAcatttttcgtt<br>gctatgtgtgggTCACATGAtaaccgagctta                                 | 5'UTR<br>intron1    | >-133<br>>259          |
| Diptera<br>( Tephritidae)  | <i>Ceratitis_capitata</i>      | <a href="#">Ccap\Atp6v1G-1</a>                |        | 82 | 173    | 101  | 110    | 171             |        |        | taggtgtgtttTCATGTGAActgcgtttgtca<br>caaccatcgggTCATGTGAtaagcaaaaatt                                 | 5'UTR?<br>intron1   | >-133<br>>166          |
|                            |                                | <a href="#">Ccap\Atp6v1G-2</a>                |        | 82 | 105    | 101  | 62     | 171             |        |        | ND                                                                                                  |                     |                        |
| Diptera<br>(Glossinidae)   | <i>Glossina_morsitans</i>      | <a href="#">Gmor\Atp6v1G<br/>TMP007097</a>    | 94     | 82 | 121    | 101  | 70     | 171             |        | 341    | ttctgtctatgTCATATGAcattacaatcc<br>agtccacaagagTCACATGAtaagattatagt                                  | 5'UTR<br>intron1    | 63<br>220              |
| Diptera<br>(Psychodidae)   | <i>Lutzomyia_longipalpis</i>   | <a href="#">Llon\Atp6v1G</a>                  |        | 82 | 113    | 278  |        |                 |        |        | cgaagtgtggagTCACATGAtttctctatcg<br>aaatactgtgagTCACATGAcgattgtaataa                                 | 5'UTR<br>intron1    | >-118<br>>155          |
|                            | <i>Phlebotomus_papatasi</i>    | <a href="#">Ppap\Atp6v1G-1</a>                |        | 82 | 109    | 278  |        |                 |        |        | ttcaacggttgaTCACATGAtttctgttatcg<br>gggaatactgagTCACATGAcgattgtgatga                                | 5'UTR<br>intron1    |                        |
|                            |                                | <a href="#">Ppap\Atp6v1G-2</a>                |        | 82 | 67     | 101  | 3682   | 171 (strand[-]) |        |        | ND                                                                                                  |                     |                        |
| Diptera<br>(Culicidae)     | <i>Anopheles_gambiae</i>       | <a href="#">Agam\Atp6v1G-1<br/>AGAP001823</a> | 132    | 82 | 204    | 101  | 82     | 168             |        | 457    | gcgctcttcaaTCACGTGAaccacgtgggg<br>accgggggttgTCATATGAtcagcgaagaaa<br>acaccactcggTCACATGAaccactgtttg | 5'<br>5'<br>intron1 | -73<br>-19<br>294      |
|                            | <i>Anopheles_arabiensis</i>    | <a href="#">Aara\Atp6v1G-1</a>                |        | 82 | 204    | 101  | 82     | 168             |        |        | gcgctcttcaaTCACGTGAaccacgtgggg<br>accgggggttgTCATATGAtcagcgaagaaa<br>acaccactcggTCACATGAaccactgtttg | 5'<br>5'<br>intron1 | >-205<br>>-152<br>>163 |

|                                  |                                                              |     |    |      |     |      |     |      |                                                                                                     |               |                        |
|----------------------------------|--------------------------------------------------------------|-----|----|------|-----|------|-----|------|-----------------------------------------------------------------------------------------------------|---------------|------------------------|
| <i>Anopheles_quadriannulatus</i> | <a href="#">Aqan\Atp6v1G-1</a>                               |     | 82 | 215  | 101 | 87   | 168 |      | acccgggggtgTCATATGAtcagcgaagaaa<br>acaccactcggTCACATGAccacctgtt                                     | 5'<br>intron1 | >-152<br>>163          |
| <i>Anopheles_christyi</i>        | <a href="#">Achr\Atp6v1G-1</a>                               |     | 82 | 214  | 101 | 82   | 168 |      | aaccgagtgcaaTACAGTGAacgtgcggacg<br>agtggagggtgTCATATGAtcaacgatgaaa<br>actgacggacggTCACATGAccacctgtt | 5'<br>intron1 | >-196<br>>-141<br>>173 |
| <i>Anopheles_epiroticus</i>      | <a href="#">Aepi\Atp6v1G-1</a>                               |     | 82 | 191  | 101 | 87   | 168 |      | cgatgtttgcaaTACAGTGAacccgtcgttg<br>ggaaggggattgTCATATGAtcaagaaaaaa<br>acgcagctcggTCACATGAccacctgtt  | 5'<br>intron1 | >-213<br>>-141<br>>158 |
| <i>Anopheles_minimus</i>         | <a href="#">Amin\Atp6v1G-1</a>                               |     | 82 | 199  | 101 | 69   | 168 |      | cactgtatgctaTACAGTGAaccaactaccg<br>aaaggggggtgTCATATGAtcaagaaaaaa<br>acgtaaccctgTCACATGAccacctgtt   | 5'<br>intron1 | >-196<br>>-139<br>>145 |
| <i>Anopheles_funestus</i>        | <a href="#">Afun\Atp6v1G-1</a>                               |     | 82 | 222  | 101 | 68   | 168 |      | aaaaggggggtgTCATATGAtcaagaaaaaa<br>acgtaaccctgTCACATGAccacctgtt                                     | 5'<br>intron1 | >-176<br>>151          |
| <i>Anopheles_stephensi</i>       | <a href="#">Aste\Atp6v1G-1</a>                               |     | 82 | 207  | 101 | 77   | 171 |      | caaagtgggtgTCATATGAtcaatgaaaaaa<br>cgttaacttggTCACATGAccacctgtt                                     | 5'<br>intron1 | >-145<br>>170          |
| <i>Anopheles_dirus</i>           | <a href="#">Adir\Atp6v1G-1</a>                               |     | 82 | 213  | 101 | 71   | 168 |      | cgccgaacgctaTACAGTGAagtggtgggtg<br>aacgaggggtgTCATATGAtctcggaaagaa<br>cgtaacgcacggTCACATGAccacctgtt | 5'<br>intron1 | >-213<br>>-162<br>>169 |
| <i>Anopheles_nili</i>            | <a href="#">Anil\Atp6v1G-1</a>                               |     | 82 | >126 | ND  | ND   | ND  |      | ctctgcacgagTACAGTGAgaagtgtttt<br>ttcgaggttTCATATGAtcaaatgaaa<br>gtaaccacggTCACATGAcccctgatgtg       | 5'<br>intron1 | >-160<br>>-130<br>>150 |
| <i>Anopheles_albimanus</i>       | <a href="#">Aalb\Atp6v1G-1</a>                               |     | 82 | 228  | 101 | 107  | 168 |      | gaaacatcgtagTCATATGAttgaggggtcgg<br>gactgtggctgTCACATGAccctctctgct                                  | 5'<br>intron1 | >-170<br>>146          |
| <i>Anopheles_darlingi</i>        | <a href="#">Adar\Atp6v1G-1</a>                               |     | 82 | 253  | 101 | 113  | 168 |      | tacgagcgtagTCATATGAttggtgggtcgg<br>actgtgaatggTCACATGAccctctctgct                                   | 5'<br>intron1 | >-176<br>>151          |
| <i>Aedes_aegypti</i>             | <a href="#">Aaeg\Atp6v1G-1</a><br><a href="#">AAEL012819</a> | 140 | 82 | 191  | 101 | 7661 | 168 | 381  | gcgctctgcaaTACAGTGAaccacgtgggg<br>caacgattcagTCATATGAtccgtctatat<br>agtgtacgtagTCACATGAcccattggacta | 5'<br>intron1 | -73<br>-20<br>295      |
| <i>Culex_pipiens_qui.</i>        | <a href="#">Cqui\Atp6v1G-1</a><br><a href="#">CPIJ006975</a> |     | 82 | 171  | 101 | 5527 | 168 |      | caagtgtcagagTCATATGAtgctcgcgcaca<br>cgcgcaggtgTCACATGActacctgctgct                                  | 5'<br>intron1 | >-253<br>>123          |
| <i>Anopheles_gambiae</i>         | <a href="#">Agam\Atp6v1G-2</a><br><a href="#">AGAP004867</a> | 126 | 82 | 239  | 101 | 75   | 174 | 1151 | ND                                                                                                  |               |                        |
| <i>Anopheles_arabiensis</i>      | <a href="#">Aara\Atp6v1G-2</a>                               |     | 82 | 238  | 101 | 75   | 174 |      | ND                                                                                                  |               |                        |
| <i>Anopheles_quadriannulatus</i> | <a href="#">Aqan\Atp6v1G-2</a>                               |     | 82 | 238  | 101 | 75   | 174 |      | ND                                                                                                  |               |                        |
| <i>Anopheles_christyi</i>        | <a href="#">Achr\Atp6v1G-2</a>                               |     | 82 | 212  | 101 | 74   | 174 |      | ND                                                                                                  |               |                        |
| <i>Anopheles_epiroticus</i>      | <a href="#">Aepi\Atp6v1G-2</a>                               |     | 82 | 223  | 101 | 73   | 174 |      | ND                                                                                                  |               |                        |
| <i>Anopheles_minimus</i>         | <a href="#">Amin\Atp6v1G-2</a>                               |     | 82 | 203  | 101 | 85   | 174 |      | ND                                                                                                  |               |                        |
| <i>Anopheles_funestus</i>        | <a href="#">Afun\Atp6v1G-2</a>                               |     | 82 | 219  | 101 | 81   | 174 |      | ND                                                                                                  |               |                        |
| <i>Anopheles_stephensi</i>       | <a href="#">Aste\Atp6v1G-2</a>                               |     | 82 | 208  | 101 | 89   | 174 |      | ND                                                                                                  |               |                        |

|                            |                                |                                               |     |     |      |              |       |     |      |    |     |                                                                                                          |                                                                                                       |                          |                       |
|----------------------------|--------------------------------|-----------------------------------------------|-----|-----|------|--------------|-------|-----|------|----|-----|----------------------------------------------------------------------------------------------------------|-------------------------------------------------------------------------------------------------------|--------------------------|-----------------------|
|                            | <i>Anopheles_dirus</i>         | <a href="#">Adir\Atp6v1G-2</a>                |     | 82  | 198  | 101          | 86    | 174 |      |    |     |                                                                                                          | ND                                                                                                    |                          |                       |
|                            | <i>Anopheles_nili</i>          | <a href="#">Anil\Atp6v1G-2</a>                |     | 82  | 184  | 101          | 73B   | 174 |      |    |     |                                                                                                          | ND                                                                                                    |                          |                       |
|                            | <i>Anopheles_albimanus</i>     | <a href="#">Aalb\Atp6v1G-2</a>                |     | 82  | 187  | 101          | 74    | 180 |      |    |     |                                                                                                          | ND                                                                                                    |                          |                       |
|                            | <i>Anopheles_darlingi</i>      | <a href="#">Adar\Atp6v1G-2</a>                |     | 82  | 182  | 101          | 71    | 180 |      |    |     |                                                                                                          | ND                                                                                                    |                          |                       |
|                            | <i>Aedes_aegypti</i>           | <a href="#">Aaeg\Atp6v1G-2<br/>AAEL007184</a> | 133 | 82  | 152  | 101          | 10739 | 180 |      |    | 755 |                                                                                                          | ND                                                                                                    |                          |                       |
|                            |                                | <a href="#">Aaeg\Atp6v1G-3<br/>AAEL013302</a> |     | 363 |      |              |       |     |      |    |     | ND                                                                                                       |                                                                                                       |                          |                       |
|                            | <i>Culex_pipiens_qui.</i>      | <a href="#">Cqui\Atp6v1G-2<br/>CPIJ013849</a> |     | 82  | 207  | 101          | 6688  | 180 |      |    |     |                                                                                                          | ND                                                                                                    |                          |                       |
|                            |                                |                                               |     |     |      |              |       |     |      |    |     |                                                                                                          |                                                                                                       |                          |                       |
| Diptera<br>(Cecidomyiidae) | <i>Mayetiola_destructor</i>    | <a href="#">Mdes\Atp6v1G-1</a>                |     | 82  | 296  | 101          | 76    | 174 |      |    |     |                                                                                                          | attttattggaTCATATGAtccgaaatgaaa<br>cataatgttcgaTCATGTGAgtttattgcct<br>tatacaagcggTCACATGActacatgattgg | 5'<br>intron1<br>intron1 | >-146<br>>170<br>>209 |
|                            |                                | <a href="#">Mdes\Atp6v1G-2</a>                |     | 82  | 782  | 101          | 95    | 183 |      |    |     |                                                                                                          | ND                                                                                                    |                          |                       |
| Lepidoptera                | <i>Bombyx_mori</i>             | <a href="#">Bmor\Atp6v1G<br/>LOC692985</a>    | 93  | 82  | 917  | 101          | ND    | 99  | 203  | 72 | 154 | taactaataaaTCATATGActttcgtcacga<br>aatccatggtcgTCACATGAttaattcaaat                                       | 5'<br>intron1                                                                                         | -2<br>342                |                       |
|                            | <i>Manduca sexta</i>           | <a href="#">Msex\Atp6v1G</a>                  |     | 82  | 562  | 101          | 1005  | 99  | 1133 | 72 |     | gaactaatgtaaTCATATGActttcgtcacga<br>ggctctttatcaTCACATGAttgctttcatat                                     | 5'<br>intron1                                                                                         | >-87<br>>253             |                       |
|                            | <i>Danaus_plexippus</i>        | <a href="#">Dple\Atp6v1G</a>                  |     | 82  | 560  | 101          | 503   | 99  | 84   | 72 |     | gaactaaaccaaTCATATGActattttcgtca                                                                         | 5'                                                                                                    | >-87                     |                       |
|                            | <i>Heliconius_melpomene</i>    | <a href="#">Hmel\Atp6v1G</a>                  |     | 82  | 1121 | 101          | 585   | 99  | 1216 | 72 |     | gaactaaaccaaTCATATGActtacttttcgt<br>ttacttttctaTCACATGAtatacttaaga                                       | 5'<br>intron1                                                                                         | >-85<br>>284             |                       |
|                            | <i>Plutella_xylostella</i>     | <a href="#">Pxyl\Atp6v1G</a>                  |     | 82  | 1024 | 101          | 1509  | 99  | 618  | 78 |     | gagataaactaaTCATATGActttcgtcacat                                                                         | 5'                                                                                                    | >-87                     |                       |
|                            |                                |                                               |     |     |      |              |       |     |      |    |     |                                                                                                          |                                                                                                       |                          |                       |
| Strepsiptera               | <i>Mengenilla_moldrzyki</i>    | <a href="#">Mmol\Atp6v1G</a>                  |     | 82  | 68   | 287          |       |     |      |    |     |                                                                                                          |                                                                                                       |                          |                       |
| Coleoptera                 | <i>Tribolium_castaneum</i>     | <a href="#">Tcas\Atp6v1G-1<br/>LOC662804</a>  | 37  | 82  | 86   | 200          |       |     | 50   | 69 | 253 | cccaactagcgaTCATATGAcatttgcctcaa                                                                         | 5'                                                                                                    | 21                       |                       |
|                            |                                | <a href="#">Tcas\Atp6v1G-2<br/>LOC658882</a>  |     | 82  | 157  | 200          |       |     | 98   | 90 |     | ND                                                                                                       |                                                                                                       |                          |                       |
|                            | <i>Dendroctonus_ponderosae</i> | <a href="#">Dpon\Atp6v1G-1</a>                |     | 82  | 215  | 200          |       |     | 945  | 69 |     | atcgattggaagTCATATGActgtcactgggt<br>tattcgttcagTCATGTGActctctgatcaa<br>gtgctggtttgcTCACATGAtgtacagggtgat | 5'<br>intron2<br>intron2                                                                              | >-97<br>>531<br>>679     |                       |
|                            |                                | <a href="#">Dpon\Atp6v1G-2</a>                |     | 85  | 206  | 200 (101+99) |       |     | 52   | 90 |     | ND                                                                                                       |                                                                                                       |                          |                       |
|                            |                                |                                               |     |     |      |              |       |     |      |    |     |                                                                                                          |                                                                                                       |                          |                       |
| Hymenoptera                | <i>Apis_mellifera</i>          | <a href="#">Amel\Atp6v1G<br/>GB13499</a>      | 76  | 82  | 412  | 101          | 117   | 99  | 79   | 75 | 741 | gaaactctaaagTCATATGAtcgatttgcgat                                                                         | 5'UTR                                                                                                 | 26                       |                       |

|                            |                                          |                               |     |     |     |     |     |    |     |    |  |                                  |                                  |        |       |
|----------------------------|------------------------------------------|-------------------------------|-----|-----|-----|-----|-----|----|-----|----|--|----------------------------------|----------------------------------|--------|-------|
|                            | <i>Apis_florea</i>                       | <a href="#">Aflo\Atp6v1G</a>  |     | 82  | 438 | 101 | 114 | 99 | 79  | 75 |  |                                  | gaaactctaaagTCATATGAtcgatttcgat  | 5'UTR? | >-42  |
|                            | <i>Bombus_terrestris</i>                 | <a href="#">Bter\Atp6v1G</a>  |     | 82  | 348 | 101 | 123 | 99 | 93  | 75 |  |                                  | aaagTCATATGATCATATGAtcgatttcgat  | 5'UTR? | >-48  |
|                            | <i>Bombus_impatiens</i>                  | <a href="#">Bimp\Atp6v1G</a>  |     | 82  | 348 | 101 | 123 | 99 | 90  | 75 |  |                                  | aaagTCATATGATCATATGAtcgatttcgat  | 5'UTR? | >-48  |
|                            | <i>Megachile_rotundata</i>               | <a href="#">Mrot\Atp6v1G</a>  |     | 82  | 353 | 101 | 93  | 99 | 77  | 75 |  |                                  | gaaactccaaagTCATATGAtcgatttgaat  | 5'UTR? | >-48  |
|                            | <i>Acromyrmex_echinatior</i>             | <a href="#">Aech\Atp6v1G</a>  |     | 82  | 560 | 101 | 95  | 99 | 86  | 75 |  |                                  | gaagctccaaagTCATATGAtcgattcgtgac | 5'UTR? | >-39  |
|                            | <i>Atta_cephalotes</i>                   | <a href="#">Acep\Atp6v1G</a>  |     | 82  | 466 | 101 | 92  | 99 | 84  | 75 |  |                                  | gaagctccaaagTCATATGAtcgattcgtgac | 5'UTR? | >-39  |
|                            | <i>Solenopsis_invicta</i>                | <a href="#">Sinv\Atp6v1G</a>  |     | 82  | 820 | 101 | 92  | 99 | 79  | 75 |  |                                  | gaagctctaaagTCATATGAtcgattcgtgac | 5'UTR? | >-39  |
|                            | <i>Pogonomyrmex_barbatus</i>             | <a href="#">Pbar\Atp6v1G*</a> |     | 82  | 576 | 101 | 94  | 99 | 81  | 75 |  |                                  | gaagctccaaagTCATATGAtcgattcgtgac | 5'UTR? | >-39  |
|                            | <i>Linepithema_humile</i>                | <a href="#">Lhum\Atp6v1G</a>  |     | 82  | 538 | 101 | 104 | 99 | 84  | 75 |  |                                  | gaagcgccaaagTCATATGAtcgattcatgat | 5'UTR? | >-44  |
|                            | <i>Harpegnathos_saltator</i>             | <a href="#">Hsal\Atp6v1G</a>  |     | 82  | 586 | 101 | 118 | 99 | 85  | 75 |  |                                  | gaagctccaaagTCATATGAtcgattcgtgat | 5'UTR? | >-44  |
|                            | <i>Camponotus_floridanus</i>             | <a href="#">Cflo\Atp6v1G</a>  |     | 82  | 561 | 101 | 107 | 99 | 122 | 75 |  |                                  | gaagctccaaagTCATATGAtcgattcgtgat | 5'UTR? | >-66  |
|                            | <i>Nasonia_giraulti</i>                  | <a href="#">Ngir\Atp6v1G</a>  |     | 360 |     |     |     |    |     |    |  |                                  | gaggtgccttgaTCATATGAtcgacttttcag | 5'UTR? | >-172 |
|                            | <i>Nasonia_longicornis</i>               | <a href="#">Nlon\Atp6v1G</a>  |     | 360 |     |     |     |    |     |    |  |                                  | gaggtgccttgaTCATATGAtcgatttttcag | 5'UTR? | >-172 |
| <i>Nasonia_vitripennis</i> | <a href="#">Nvit\Atp6v1G<br/>NV17706</a> | 23+91+37                      | 360 |     |     |     |     |    |     |    |  | gaggtgccttgaTCATATGAtcgatttttcag | 5'UTR?                           | -21    |       |

|              |                           |                                              |     |    |     |     |    |     |      |    |     |  |                                  |        |        |
|--------------|---------------------------|----------------------------------------------|-----|----|-----|-----|----|-----|------|----|-----|--|----------------------------------|--------|--------|
| Hemiptera    | <i>Acyrtosiphon_pisum</i> | <a href="#">Apis\Atp6v1G<br/>ACYPI000034</a> | 68  | 82 | 958 | 101 | 68 | 183 |      |    | 405 |  | ND                               |        |        |
|              | <i>Rhodnius_prolixus</i>  | <a href="#">Rpro\Atp6v1G</a>                 | 123 | 82 | 270 | 101 | 76 | 99  | 1773 | 72 | 187 |  | ND                               |        |        |
| Phthiraptera | <i>Pediculus_humanus</i>  | <a href="#">Phum\Atp6v1G</a>                 |     | 82 | ND  | 278 |    |     |      |    |     |  | ttcttactatTCAAATGAcatttatttg     | 5'?    | > -422 |
| Odonata      | <i>Ladona_fulva</i>       | <a href="#">Lful\Atp6v1G</a>                 |     | 82 | 125 | 101 | 74 | 99  | 79   | 87 |     |  | tcctgtgtcttgTCATGTGAtcgatctgtaac | 5'UTR? | >-49   |
| Crustacea    | <i>Daphnia_pulex</i>      | <a href="#">Dpul\Atp6v1G</a>                 | 79  | 82 | 425 | 101 | 62 | 171 |      |    | 161 |  | tggtccagcagTCATATGAcaggaagtcaca  | 5'     | -34    |
| Ixodida      | <i>Ixodes_scapularis</i>  | <a href="#">Isca\Atp6v1G</a>                 | 86  | 82 | 117 | 101 | ND | 168 |      |    | 95  |  | gtaggtcgccgaTCACCTGActgcggcagtg  | 5'UTR  | 18     |

|          |                               |                              |     |    |       |     |      |             |      |                                                                       |               |            |
|----------|-------------------------------|------------------------------|-----|----|-------|-----|------|-------------|------|-----------------------------------------------------------------------|---------------|------------|
|          | <i>Homo_sapiens</i>           | <a href="#">ATP6V1G1</a>     | 125 | 82 | 4631  | 101 | 4917 | 174         | 1129 | gttcaagagcggTCAGCTGAtgctactgctgtg<br>tacgctgtgctgTCACGTGAcaacgggggcga | 5'<br>5'UTR?  | -19<br>4   |
|          |                               | <a href="#">ATP6V1G2</a>     | 291 | 82 | 268   | 101 | 527  | 174         | 946  | ND                                                                    |               |            |
| Cnidaria | <i>Nematostella_vectensis</i> | <a href="#">v1g191954</a>    | 28  | 82 | 3361? | 101 | 591  | 171         | 606  | acgTCACGTGAccgagtaccaTCATGTGAtga<br>ttttgtatctTCATATGAttttgctactac    | 5'<br>intron1 | -12<br>285 |
| Placozoa | <i>Trichoplax_adhaerens</i>   | <a href="#">Tadh\Atp6v1G</a> | 39  | 82 | 287   | 101 | 776  | 171 (99+72) | 124  | tctgtcaagaggTCATATGAtgcgagatgtca                                      | 5'            | -638       |

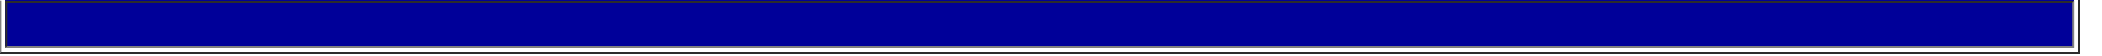

Supplement: s1 [file s1]
