# Supplementary material for: Structural and Comparative Analyses of Insects Suggest the Presence of an Ultra-Conserved Regulatory Element of the Genes Encoding Vacuolar-Type ATPase Subunits and Assembly Factors
Source: MDPI journal article supplement (doi:10.3390/biology12081127), 2023-08-13
Supplement: s1 [file s1]

|                                     |                                                                                                                                                                           |
|-------------------------------------|---------------------------------------------------------------------------------------------------------------------------------------------------------------------------|
| Gene Cluster ID                     | Atp6v0c                                                                                                                                                                   |
| <b>Drosophila melanogaster gene</b> | <b>Vha16-1 (CG3161)</b>                                                                                                                                                   |
| FlyBase ID                          | <a href="#">FBgn0262736</a>                                                                                                                                               |
| <b>Predicted function</b>           | <b>ATPase, H<sup>+</sup> transporting, V0 subunit c</b>                                                                                                                   |
| Protein size                        | 159 amino acids                                                                                                                                                           |
| Cytogenetic map                     | 2R:42B2-42B2                                                                                                                                                              |
| Gene sequence location              | <a href="#">2R:2512747..2520633</a> [-]                                                                                                                                   |
| <b>Dmel CLEAR sequence(s)</b>       | <b>TCACGTGA; TCATGTGA; TCACAAGA; TCACATGC;<br/>TCACATGG; TCACATGA; TCACATGA; TCATGTGA</b>                                                                                 |
| CLEAR sequence location(s)          | 2R:2520496..2520503; 2R:2520461..2520468; 2R:2518990..2518997; 2R:2518647..2518654;<br>2R:2518597..2518604; 2R:2518099..2518106; 2R:2516246..2516253; 2R:2515721..2515728 |
| Drosophila Atp6v0c paralogs         | <a href="#">Vha16-2</a> (CG32089); <a href="#">Vha16-3</a> (CG32090); <a href="#">Vha16-4</a> (CG9013); <a href="#">Vha16-5</a> (CG6737)                                  |

FlyBase Vha16-1 (CG3161) gene model & CLEAR element (red) positions:

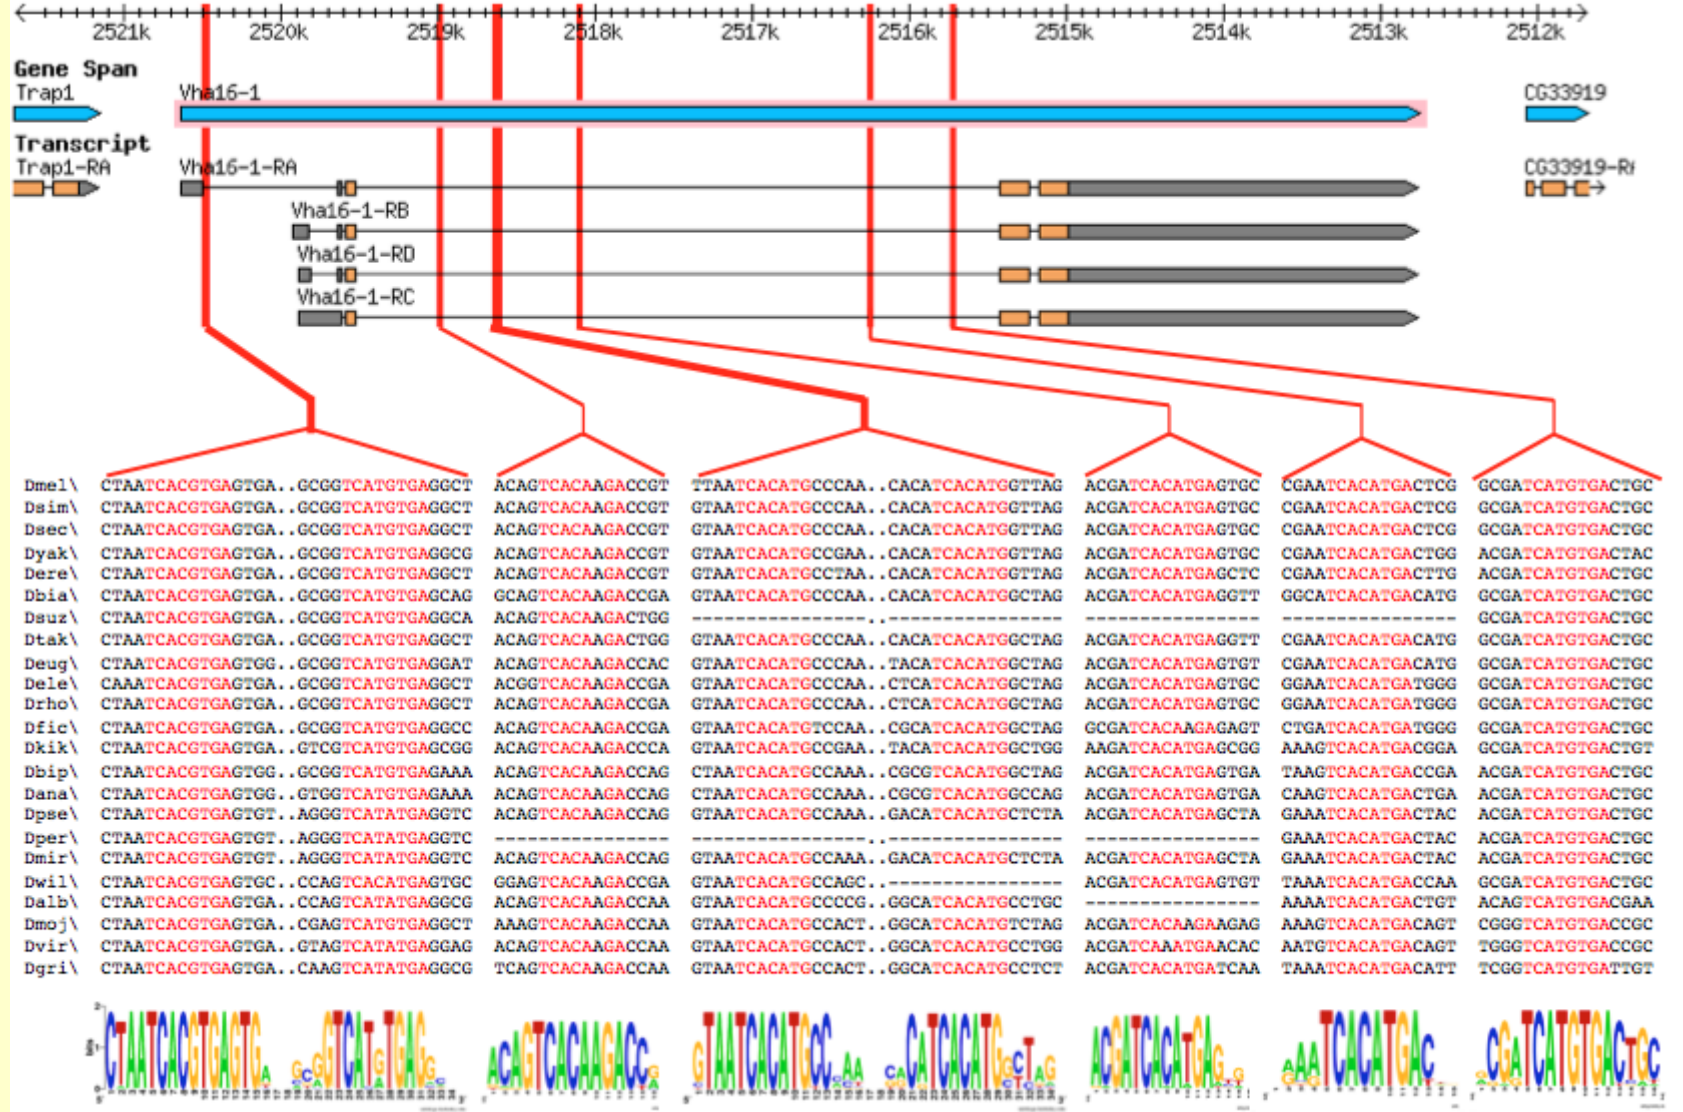

Atpv0c gene structure comparison:

Key: UTR region, CDS region

| Species | Atp6v0c orthologs | 5'exon | intron | exon | intron | exon3' | Extended CLEAR region | Position | bps from |
|---------|-------------------|--------|--------|------|--------|--------|-----------------------|----------|----------|
|---------|-------------------|--------|--------|------|--------|--------|-----------------------|----------|----------|

|                                 |                              |           |    |       |     |    |     |      |                                                                      |                      |           |
|---------------------------------|------------------------------|-----------|----|-------|-----|----|-----|------|----------------------------------------------------------------------|----------------------|-----------|
|                                 |                              |           |    |       |     |    |     |      |                                                                      |                      | TSS       |
| <i>Drosophila_melanogaster</i>  | <a href="#">Dmel\Vha16-1</a> | 96+854+29 | 85 | 4105  | 190 | 57 | 205 | 2228 | ttagatttctaaTCACGTGAgtgaaaaagcag<br>aaagataggcggTCATGTGAggctagccctgc | exon/int<br>intron1  | 93<br>128 |
| <i>Drosophila_simulans</i>      | <a href="#">Dsim\GD10321</a> |           | 85 | 4121  | 190 | 60 | 205 |      | ttagatttctaaTCACGTGAgtgaaaaagcag<br>aaagataggcggTCATGTGAggctagccctgc | exon/int?<br>intron1 |           |
| <i>Drosophila_sechellia</i>     | <a href="#">Dsec\GM20869</a> |           | 85 | 4106  | 190 | 60 | 205 |      | ttagatttctaaTCACGTGAgtgaaaaagcag<br>aaagataggcggTCATGTGAggctagccctgc | exon/int?<br>intron1 |           |
| <i>Drosophila_yakuba</i>        | <a href="#">Dyak\Vha16</a>   |           | 85 | 3891  | 190 | 61 | 205 |      | ttagatttctaaTCACGTGAgtgaaaaagcag<br>aaagataggcggTCATGTGAggctagccctgc | exon/int?<br>intron1 |           |
| <i>Drosophila_erecta</i>        | <a href="#">Dere\GG10820</a> |           | 85 | 4097  | 190 | 57 | 205 |      | ttagaattctaaTCACGTGAgtgaaaaagcag<br>aaagataggcggTCATGTGAggctagccctgc | exon/int?<br>intron1 |           |
| <i>Drosophila_biarmipes</i>     | <a href="#">Dbia\Vha16-1</a> |           | 85 | 4328  | 190 | 68 | 205 |      | ttagatttctaaTCACGTGAgtgaaaaagcaa<br>aaagataggcggTCATGTGAgcaggccagccc | exon/int?<br>intron1 |           |
| <i>Drosophila_suzukii</i>       | <a href="#">Dsuz\Vha16-1</a> |           | 85 | ND    | 190 | 60 | 205 |      | ttagatttctaaTCACGTGAgtgaaaaagcaa<br>aaagataggcggTCATGTGAggcaagccctgc | exon/int?<br>intron1 |           |
| <i>Drosophila_takahashii</i>    | <a href="#">Dtak\Vha16-1</a> |           | 85 | 4179  | 190 | 71 | 205 |      | ttagatttctaaTCACGTGAgtgaaaaagcca<br>aaagataggcggTCATGTGAggctagccctgc | exon/int?<br>intron1 |           |
| <i>Drosophila_eugracilis</i>    | <a href="#">Deug\Vha16-1</a> |           | 85 | 4018  | 190 | 57 | 205 |      | ttagatttctaaTCACGTGAgtggaaaagcat<br>gccgatcgccggTCATGTGAggatagcctgcc | exon/int?<br>intron1 |           |
| <i>Drosophila_elegans</i>       | <a href="#">Dele\Vha16-1</a> |           | 85 | 4592  | 190 | 57 | 205 |      | ttagatttcaaaTCACGTGAgtgaaaaaaga<br>aaagataggcggTCATGTGAggctcgcctgc   | exon/int?<br>intron1 |           |
| <i>Drosophila_rhopaloea</i>     | <a href="#">Drho\Vha16-1</a> |           | 85 | 4326  | 190 | 58 | 205 |      | ttagatttctaaTCACGTGAgtgaaaaagctaa<br>aaagattggcggTCATGTGAggctcgcctgc | exon/int?<br>intron1 |           |
| <i>Drosophila_ficusphila</i>    | <a href="#">Dfic\Vha16-1</a> |           | 85 | 4020  | 190 | 57 | 205 |      | ttagatttctaaTCACGTGAgtgaaaaagcag<br>aaagataggcggTCATGTGAggccagcggaa  | exon/int?<br>intron1 |           |
| <i>Drosophila_kikkawai</i>      | <a href="#">Dkik\Vha16-1</a> |           | 85 | 3795  | 190 | 70 | 205 |      | ttagatttctaaTCACGTGAgtgaagaagagt<br>catagttagtcgTCATGTGAgcggaagttt   | exon/int?<br>intron1 |           |
| <i>Drosophila_bipectinata</i>   | <a href="#">Dbip\Vha16-1</a> |           | 85 | 3476  | 190 | 68 | 205 |      | ttagatttctaaTCACGTGAgtggaaaaaac<br>gtaaataagcggTCATGTGAgaaaaagttct   | exon/int?<br>intron1 |           |
| <i>Drosophila_ananassae</i>     | <a href="#">Dana\GF13808</a> |           | 85 | 3429  | 190 | 70 | 205 |      | ttagatttctaaTCACGTGAgtggaaaaaca<br>gtaaataagtggTCATGTGAgaaaaagttct   | exon/int?<br>intron1 |           |
| <i>Drosophila_pseudoobscura</i> | <a href="#">Dpse\GA16335</a> |           | 85 | 4293  | 190 | 72 | 205 |      | ttagatttctaaTCACGTGAgtgtgaacaaat<br>acgaccagagggTCATATGAggtccaataaaa | exon/int?<br>intron1 |           |
| <i>Drosophila_persimilis</i>    | <a href="#">Dper\GL20293</a> |           | 85 | 3204? | 190 | 72 | 205 |      | ttagatttctaaTCACGTGAgtgtgaacaaat<br>acgaccagagggTCATATGAggtccaataaaa | exon/int?<br>intron1 |           |
| <i>Drosophila_miranda</i>       | <a href="#">Dmir\Vha16-1</a> |           | 85 | 3204? | 190 | 72 | 205 |      | ttagatttctaaTCACGTGAgtgtgaacaaat<br>acggccagagggTCATATGAggtccaataaaa | exon/int?<br>intron1 |           |
| <i>Drosophila_willistoni</i>    | <a href="#">Dwil\GK19648</a> |           | 85 | 5070  | 190 | 76 | 205 |      | ttaaatttctaaTCACGTGAgtgccgagatac<br>aaaactctccagTCACATGAgtcgaggtctt  | exon/int?<br>intron1 |           |
| <i>Drosophila_albomicans</i>    | <a href="#">Dalb\Vha16-1</a> |           | 85 | >5215 | 190 | 65 | 205 |      | ttagatttctaaTCACGTGAgtgaaaaaaaa<br>aaaaacaaccagTCATATGAggcgaatcaaa   | exon/int?<br>intron1 |           |

|                                 |                              |    |    |      |     |    |     |  |                                                                      |                      |  |
|---------------------------------|------------------------------|----|----|------|-----|----|-----|--|----------------------------------------------------------------------|----------------------|--|
| <i>Drosophila_mojavensis</i>    | <a href="#">Dmoj\GI21278</a> |    | 85 | 5825 | 190 | 71 | 205 |  | ttagatttctaaTCACGTGAgtgaaaaaaag<br>gaaacaatcgagTCATGTGAggctccatcgaa  | exon/int?<br>intron1 |  |
| <i>Drosophila_virilis</i>       | <a href="#">Dvir\GJ20880</a> |    | 82 | 5409 | 190 | 59 | 205 |  | ttagatttctaaTCACGTGAgtgaagaaaaaa<br>aaaaaacagtagTCATATGAggagcaatcgaa | exon/int?<br>intron1 |  |
| <i>Drosophila_grimshawi</i>     | <a href="#">Dgri\GH22892</a> |    | 91 | 5471 | 190 | 72 | 205 |  | ttagatttctaaTCACGTGAgtgaaaaaata<br>ttcaaatcaagTCATATGAggcgcaatcgta   | exon/int?<br>intron1 |  |
| Vha16-2 (CG32089)               |                              |    |    |      |     |    |     |  |                                                                      |                      |  |
| <i>Drosophila_melanogaster</i>  | <a href="#">Dmel\Vha16-2</a> | 40 |    |      | 477 |    | 78  |  |                                                                      |                      |  |
| <i>Drosophila_simulans</i>      | Dsim\Vha16-2                 |    |    |      | 477 |    |     |  |                                                                      |                      |  |
| <i>Drosophila_sechellia</i>     | <a href="#">Dsec\GM25274</a> |    |    |      | 477 |    |     |  |                                                                      |                      |  |
| <i>Drosophila_yakuba</i>        | <a href="#">Dyak\GE21813</a> |    |    |      | 477 |    |     |  |                                                                      |                      |  |
| <i>Drosophila_erecta</i>        | <a href="#">Dere\GG15505</a> |    |    |      | 477 |    |     |  |                                                                      |                      |  |
| <i>Drosophila_biarmipes</i>     | <a href="#">Dbia\Vha16-2</a> |    |    |      | 477 |    |     |  |                                                                      |                      |  |
| <i>Drosophila_suzukii</i>       | <a href="#">Dsuz\Vha16-2</a> |    |    |      | 477 |    |     |  |                                                                      |                      |  |
| <i>Drosophila_takahashii</i>    | <a href="#">Dtak\Vha16-2</a> |    |    |      | 477 |    |     |  |                                                                      |                      |  |
| <i>Drosophila_eugracilis</i>    | <a href="#">Deug\Vha16-2</a> |    |    |      | 480 |    |     |  |                                                                      |                      |  |
| <i>Drosophila_elegans</i>       | <a href="#">Dele\Vha16-2</a> |    |    |      | 480 |    |     |  |                                                                      |                      |  |
| <i>Drosophila_rhopaloea</i>     | <a href="#">Drho\Vha16-2</a> |    |    |      | 480 |    |     |  |                                                                      |                      |  |
| <i>Drosophila_ficusphila</i>    | <a href="#">Dfic\Vha16-2</a> |    |    |      | 477 |    |     |  |                                                                      |                      |  |
| <i>Drosophila_kikkawai</i>      | <a href="#">Dkik\Vha16-2</a> |    |    |      | 477 |    |     |  |                                                                      |                      |  |
| <i>Drosophila_bipectinata</i>   | <a href="#">Dbip\Vha16-2</a> |    |    |      | 480 |    |     |  |                                                                      |                      |  |
| <i>Drosophila_ananassae</i>     | <a href="#">Dana\GF25266</a> |    |    |      | 480 |    |     |  |                                                                      |                      |  |
| <i>Drosophila_pseudoobscura</i> | <a href="#">Dpse\GA26306</a> |    |    |      | 480 |    |     |  |                                                                      |                      |  |
| <i>Drosophila_persimilis</i>    | <a href="#">Dper\GL21512</a> |    |    |      | 480 |    |     |  |                                                                      |                      |  |
| <i>Drosophila_miranda</i>       |                              |    |    |      |     |    |     |  |                                                                      |                      |  |
| <i>Drosophila_willistoni</i>    | <a href="#">Dwil\GK17171</a> |    |    |      | 483 |    |     |  |                                                                      |                      |  |
| <i>Drosophila_albomicans</i>    | <a href="#">Dalb\Vha16-2</a> |    |    |      | 477 |    |     |  |                                                                      |                      |  |
| <i>Drosophila_mojavensis</i>    | <a href="#">Dmoj\GI11613</a> |    |    |      | 477 |    |     |  |                                                                      |                      |  |
| <i>Drosophila_virilis</i>       | <a href="#">Dvir\GJ11292</a> |    |    |      | 480 |    |     |  |                                                                      |                      |  |

|                                 |                              |    |     |    |  |  |  |
|---------------------------------|------------------------------|----|-----|----|--|--|--|
| <i>Drosophila_grimshawi</i>     | <a href="#">Dgri\GH16653</a> |    | 480 |    |  |  |  |
| Vha16-3 (CG32090)               |                              |    |     |    |  |  |  |
| <i>Drosophila_melanogaster</i>  | <a href="#">Dmel\Vha16-3</a> |    | 477 |    |  |  |  |
| <i>Drosophila_simulans</i>      | <a href="#">Dsim\GD14307</a> |    | 477 |    |  |  |  |
| <i>Drosophila_sechellia</i>     | <a href="#">Dsec\GM25273</a> |    | 477 |    |  |  |  |
| <i>Drosophila_yakuba</i>        | <a href="#">Dyak\GE21812</a> |    | 477 |    |  |  |  |
| <i>Drosophila_erecta</i>        | <a href="#">Dere\GG15504</a> |    | 477 |    |  |  |  |
| <i>Drosophila_biarmipes</i>     | <a href="#">Dbia\Vha16-3</a> |    | 477 |    |  |  |  |
| <i>Drosophila_suzukii</i>       | <a href="#">Dsuz\Vha16-3</a> |    | 477 |    |  |  |  |
| <i>Drosophila_takahashii</i>    | <a href="#">Dtak\Vha16-3</a> |    | 477 |    |  |  |  |
| <i>Drosophila_eugracilis</i>    | <a href="#">Deug\Vha16-3</a> |    | 477 |    |  |  |  |
| <i>Drosophila_elegans</i>       | <a href="#">Dele\Vha16-3</a> |    | 477 |    |  |  |  |
| <i>Drosophila_rhopaloea</i>     | <a href="#">Drho\Vha16-3</a> |    | 477 |    |  |  |  |
| <i>Drosophila_ficusphila</i>    | <a href="#">Dfic\Vha16-3</a> |    | 477 |    |  |  |  |
| <i>Drosophila_kikkawai</i>      | <a href="#">Dkik\Vha16-3</a> |    | 477 |    |  |  |  |
| <i>Drosophila_bipectinata</i>   | <a href="#">Dbip\Vha16-3</a> |    | 474 |    |  |  |  |
| <i>Drosophila_ananassae</i>     | <a href="#">Dana\GF25265</a> |    | 474 |    |  |  |  |
| <i>Drosophila_pseudoobscura</i> | <a href="#">Dpse\GA26304</a> |    | 489 |    |  |  |  |
| <i>Drosophila_persimilis</i>    | <a href="#">Dper\GL21511</a> |    | 489 |    |  |  |  |
| <i>Drosophila_miranda</i>       | <a href="#">Dmir\Vha16-3</a> |    | 489 |    |  |  |  |
| <i>Drosophila_willistoni</i>    | <a href="#">Dwil\GK17170</a> |    | 483 |    |  |  |  |
| <i>Drosophila_albomicans</i>    | <a href="#">Dalb\Vha16-3</a> |    | 486 |    |  |  |  |
| <i>Drosophila_mojavensis</i>    | <a href="#">Dmoj\GI11612</a> |    | 477 |    |  |  |  |
| <i>Drosophila_virilis</i>       | <a href="#">Dvir\GJ11291</a> |    | 480 |    |  |  |  |
| <i>Drosophila_grimshawi</i>     | <a href="#">Dgri\GH16652</a> |    | 486 |    |  |  |  |
| Vha16-4 (CG9013)                |                              |    |     |    |  |  |  |
| <i>Drosophila_melanogaster</i>  | <a href="#">Dmel\Vha16-4</a> | 46 | 468 | 53 |  |  |  |

|                                 |                               |  |     |  |  |  |  |
|---------------------------------|-------------------------------|--|-----|--|--|--|--|
| <i>Drosophila_simulans</i>      | <a href="#">Dsim\GD25509</a>  |  | 477 |  |  |  |  |
| <i>Drosophila_sechellia</i>     | <a href="#">Dsec\GM20023</a>  |  | 477 |  |  |  |  |
| <i>Drosophila_yakuba</i>        | <a href="#">Dyak\GE14233</a>  |  | 477 |  |  |  |  |
| <i>Drosophila_erecta</i>        | <a href="#">Dere\GG22236</a>  |  | 477 |  |  |  |  |
| <i>Drosophila_biarmipes</i>     | <a href="#">Dbia\Vha16-4</a>  |  | 468 |  |  |  |  |
| <i>Drosophila_suzukii</i>       | <a href="#">Dsuz\Vha16-4</a>  |  | 477 |  |  |  |  |
| <i>Drosophila_takahashii</i>    | <a href="#">Dtak\Vha16-4</a>  |  | 480 |  |  |  |  |
| <i>Drosophila_eugracilis</i>    | <a href="#">Deug\Vha16-4</a>  |  | 480 |  |  |  |  |
| <i>Drosophila_elegans</i>       | <a href="#">Dele\Vha16-4</a>  |  | 477 |  |  |  |  |
| <i>Drosophila_rhopaloea</i>     | <a href="#">Drho\Vha16-4</a>  |  | 477 |  |  |  |  |
| <i>Drosophila_ficusphila</i>    | <a href="#">Dfic\Vha16-4</a>  |  | 468 |  |  |  |  |
| <i>Drosophila_kikkawai</i>      | <a href="#">Dkik\Vha16-4</a>  |  | 471 |  |  |  |  |
| <i>Drosophila_bipectinata</i>   | <a href="#">Dbip\Vha16-4</a>  |  | 495 |  |  |  |  |
| <i>Drosophila_ananassae</i>     | <a href="#">Dana\GF13441*</a> |  | 495 |  |  |  |  |
| <i>Drosophila_pseudoobscura</i> | <a href="#">Dpse\GA21477</a>  |  | 498 |  |  |  |  |
| <i>Drosophila_persimilis</i>    | <a href="#">Dper\GL10498</a>  |  | 498 |  |  |  |  |
| <i>Drosophila_miranda</i>       | <a href="#">Dmir\Vha16-4</a>  |  | 498 |  |  |  |  |
| <i>Drosophila_willistoni</i>    | <a href="#">Dwil\GK22034</a>  |  | 483 |  |  |  |  |
| <i>Drosophila_albomicans</i>    | <a href="#">Dalb\Vha16-4</a>  |  | 483 |  |  |  |  |

#### Vha16-5 (CG6737)

|                                |                              |  |     |  |  |  |  |
|--------------------------------|------------------------------|--|-----|--|--|--|--|
| <i>Drosophila_melanogaster</i> | <a href="#">Dmel\Vha16-5</a> |  | 582 |  |  |  |  |
| <i>Drosophila_simulans</i>     | <a href="#">Dsim\GD22230</a> |  | 576 |  |  |  |  |
| <i>Drosophila_sechellia</i>    | <a href="#">Dsec\GM11483</a> |  | 576 |  |  |  |  |
| <i>Drosophila_yakuba</i>       | <a href="#">Dyak\GE13384</a> |  | 576 |  |  |  |  |
| <i>Drosophila_erecta</i>       | <a href="#">Dere\GG10362</a> |  | 576 |  |  |  |  |
| <i>Drosophila_biarmipes</i>    | <a href="#">Dbia\Vha16-5</a> |  | 579 |  |  |  |  |
| <i>Drosophila_suzukii</i>      | <a href="#">Dsuz\Vha16-5</a> |  | 576 |  |  |  |  |

|                                 |                              |  |     |  |  |  |  |
|---------------------------------|------------------------------|--|-----|--|--|--|--|
| <i>Drosophila_takahashii</i>    |                              |  |     |  |  |  |  |
| <i>Drosophila_eugracilis</i>    |                              |  |     |  |  |  |  |
| <i>Drosophila_elegans</i>       | <a href="#">Dele\Vha16-5</a> |  | 576 |  |  |  |  |
| <i>Drosophila_rhopaloea</i>     | <a href="#">Drho\Vha16-5</a> |  | 576 |  |  |  |  |
| <i>Drosophila_ficusphila</i>    | <a href="#">Dfic\Vha16-5</a> |  | 567 |  |  |  |  |
| <i>Drosophila_kikkawai</i>      | <a href="#">Dkik\Vha16-5</a> |  | 558 |  |  |  |  |
| <i>Drosophila_bipectinata</i>   | <a href="#">Dbip\Vha16-5</a> |  | 558 |  |  |  |  |
| <i>Drosophila_ananassae</i>     | <a href="#">Dana\GF19671</a> |  | 558 |  |  |  |  |
| <i>Drosophila_pseudoobscura</i> | <a href="#">Dpse\GA25245</a> |  | 549 |  |  |  |  |
| <i>Drosophila_persimilis</i>    | <a href="#">Dper\GL26032</a> |  | 549 |  |  |  |  |
| <i>Drosophila_miranda</i>       | <a href="#">Dmir\Vha16-5</a> |  | 549 |  |  |  |  |
| <i>Drosophila_willistoni</i>    | <a href="#">Dwil\GK18316</a> |  | 555 |  |  |  |  |
| <i>Drosophila_albomicans</i>    | <a href="#">Dalb\Vha16-5</a> |  | 510 |  |  |  |  |
| <i>Drosophila_mojavensis</i>    | <a href="#">Dmoj\GI13313</a> |  | 528 |  |  |  |  |
| <i>Drosophila_virilis</i>       | <a href="#">Dvir\GJ11943</a> |  | 540 |  |  |  |  |
| <i>Drosophila_grimshawi</i>     | <a href="#">Dgri\GH10920</a> |  | 522 |  |  |  |  |
