# Supplementary material for: Structural and Comparative Analyses of Insects Suggest the Presence of an Ultra-Conserved Regulatory Element of the Genes Encoding Vacuolar-Type ATPase Subunits and Assembly Factors
Source: MDPI journal article supplement (doi:10.3390/biology12081127), 2023-08-13
Supplement: s1 [file s1]

| Gene Cluster ID                                                                                                                                                                                                                                                                                                                                                                                                                                                                                                                                                                                                                                                                                                                                                                                                                                                                                                                                                                                                                                                                                                                                                                                                                                                                                                                                                                                                                                                                                                                                                                                                                                                                                                                                                                                                                                                                                                                                                                                                                                                                                                                                                                                                                                                                                                                                                                                                                                                                                                                                                                                                                                                                                                                                                                                                                                                                                                                                                                                                                                                                                                                                                                                                                                                                                                                                                                                                                                                                                                                                                                                                                                                                                                                                                                                                                                                                                                                                                                                                                                                                                                                                                                                                                                                                                                                                                                                                                                                                                                                                                                                                                                                                                                                                                                                                                                                                                                                                                                                                                                                                                                                                                                                                                                                                                                                                                                                                                                                                                                                                                                                                                                                                                                                                                                                                                                                                                                                                                                                                                                                                                                                                                                                                                                                                                                                                                                                                                                                                                                                                                                                                                                                                                                                                                                                                                                                                                                                                                                                                                                                                                                                                                                                                                                                                                                                                                                                                                                                                                                                                                                                                                                                                                                                                                                                                                                                                                                                                                                                                                                                                                                                                                                                                                                                                                                                                                                                                                                                                                                                                                                                                                                                                                                                                                                                                                                                                                                                                                                                                                                                                                                                                                                                                                                                                                                                                                                                                                                                                                                                                                                                                                                                                                                                                                                                                                                                                                                                                                                                                                                                                                                                                                                                                                                                                                                                                                                                                                                                                                                                                                                                                                                                                                                                                                                                                                                                                                                                                                                                                                                                                                                                                                                                                                                                                                                                                                                                                                                                                                                                                                                    | Atp6v0b                                                |
|------------------------------------------------------------------------------------------------------------------------------------------------------------------------------------------------------------------------------------------------------------------------------------------------------------------------------------------------------------------------------------------------------------------------------------------------------------------------------------------------------------------------------------------------------------------------------------------------------------------------------------------------------------------------------------------------------------------------------------------------------------------------------------------------------------------------------------------------------------------------------------------------------------------------------------------------------------------------------------------------------------------------------------------------------------------------------------------------------------------------------------------------------------------------------------------------------------------------------------------------------------------------------------------------------------------------------------------------------------------------------------------------------------------------------------------------------------------------------------------------------------------------------------------------------------------------------------------------------------------------------------------------------------------------------------------------------------------------------------------------------------------------------------------------------------------------------------------------------------------------------------------------------------------------------------------------------------------------------------------------------------------------------------------------------------------------------------------------------------------------------------------------------------------------------------------------------------------------------------------------------------------------------------------------------------------------------------------------------------------------------------------------------------------------------------------------------------------------------------------------------------------------------------------------------------------------------------------------------------------------------------------------------------------------------------------------------------------------------------------------------------------------------------------------------------------------------------------------------------------------------------------------------------------------------------------------------------------------------------------------------------------------------------------------------------------------------------------------------------------------------------------------------------------------------------------------------------------------------------------------------------------------------------------------------------------------------------------------------------------------------------------------------------------------------------------------------------------------------------------------------------------------------------------------------------------------------------------------------------------------------------------------------------------------------------------------------------------------------------------------------------------------------------------------------------------------------------------------------------------------------------------------------------------------------------------------------------------------------------------------------------------------------------------------------------------------------------------------------------------------------------------------------------------------------------------------------------------------------------------------------------------------------------------------------------------------------------------------------------------------------------------------------------------------------------------------------------------------------------------------------------------------------------------------------------------------------------------------------------------------------------------------------------------------------------------------------------------------------------------------------------------------------------------------------------------------------------------------------------------------------------------------------------------------------------------------------------------------------------------------------------------------------------------------------------------------------------------------------------------------------------------------------------------------------------------------------------------------------------------------------------------------------------------------------------------------------------------------------------------------------------------------------------------------------------------------------------------------------------------------------------------------------------------------------------------------------------------------------------------------------------------------------------------------------------------------------------------------------------------------------------------------------------------------------------------------------------------------------------------------------------------------------------------------------------------------------------------------------------------------------------------------------------------------------------------------------------------------------------------------------------------------------------------------------------------------------------------------------------------------------------------------------------------------------------------------------------------------------------------------------------------------------------------------------------------------------------------------------------------------------------------------------------------------------------------------------------------------------------------------------------------------------------------------------------------------------------------------------------------------------------------------------------------------------------------------------------------------------------------------------------------------------------------------------------------------------------------------------------------------------------------------------------------------------------------------------------------------------------------------------------------------------------------------------------------------------------------------------------------------------------------------------------------------------------------------------------------------------------------------------------------------------------------------------------------------------------------------------------------------------------------------------------------------------------------------------------------------------------------------------------------------------------------------------------------------------------------------------------------------------------------------------------------------------------------------------------------------------------------------------------------------------------------------------------------------------------------------------------------------------------------------------------------------------------------------------------------------------------------------------------------------------------------------------------------------------------------------------------------------------------------------------------------------------------------------------------------------------------------------------------------------------------------------------------------------------------------------------------------------------------------------------------------------------------------------------------------------------------------------------------------------------------------------------------------------------------------------------------------------------------------------------------------------------------------------------------------------------------------------------------------------------------------------------------------------------------------------------------------------------------------------------------------------------------------------------------------------------------------------------------------------------------------------------------------------------------------------------------------------------------------------------------------------------------------------------------------------------------------------------------------------------------------------------------------------------------------------------------------------------------------------------------------------------------------------------------------------------------------------------------------------------------------------------------------------------------------------------------------------------------------------------------------------------------------------------------------------------------------------------------------------------------------------------------------------------------------------------------------------------------------------------------------------------------------------------------------------------------------------------------------------------------------------------------------------------------------------------------------------------------------------------------------------------------------------------------------------------------------------------------------------------------------------------------------------------------------------------------------------------------------------------------------------------------------------------------------------------------------------------------------------------------------------------------------------------------------------------------------------------------------------------------------------------------------------------------------------------------------------------------------------------------------------------------------------------------------------------------------------------------------------------------------------------------------------------------------------------------------------------------------------------------------------------------------------------------------------------------------------------------------------------------------------------------------------------------------------------------------------------------------------------------------------------------------------------------------------------------------------------------------------------------------------------------------------------------|--------------------------------------------------------|
| Drosophila melanogaster gene                                                                                                                                                                                                                                                                                                                                                                                                                                                                                                                                                                                                                                                                                                                                                                                                                                                                                                                                                                                                                                                                                                                                                                                                                                                                                                                                                                                                                                                                                                                                                                                                                                                                                                                                                                                                                                                                                                                                                                                                                                                                                                                                                                                                                                                                                                                                                                                                                                                                                                                                                                                                                                                                                                                                                                                                                                                                                                                                                                                                                                                                                                                                                                                                                                                                                                                                                                                                                                                                                                                                                                                                                                                                                                                                                                                                                                                                                                                                                                                                                                                                                                                                                                                                                                                                                                                                                                                                                                                                                                                                                                                                                                                                                                                                                                                                                                                                                                                                                                                                                                                                                                                                                                                                                                                                                                                                                                                                                                                                                                                                                                                                                                                                                                                                                                                                                                                                                                                                                                                                                                                                                                                                                                                                                                                                                                                                                                                                                                                                                                                                                                                                                                                                                                                                                                                                                                                                                                                                                                                                                                                                                                                                                                                                                                                                                                                                                                                                                                                                                                                                                                                                                                                                                                                                                                                                                                                                                                                                                                                                                                                                                                                                                                                                                                                                                                                                                                                                                                                                                                                                                                                                                                                                                                                                                                                                                                                                                                                                                                                                                                                                                                                                                                                                                                                                                                                                                                                                                                                                                                                                                                                                                                                                                                                                                                                                                                                                                                                                                                                                                                                                                                                                                                                                                                                                                                                                                                                                                                                                                                                                                                                                                                                                                                                                                                                                                                                                                                                                                                                                                                                                                                                                                                                                                                                                                                                                                                                                                                                                                                                                                       | VhaPPA1-1 (CG7007)                                     |
| FlyBase ID                                                                                                                                                                                                                                                                                                                                                                                                                                                                                                                                                                                                                                                                                                                                                                                                                                                                                                                                                                                                                                                                                                                                                                                                                                                                                                                                                                                                                                                                                                                                                                                                                                                                                                                                                                                                                                                                                                                                                                                                                                                                                                                                                                                                                                                                                                                                                                                                                                                                                                                                                                                                                                                                                                                                                                                                                                                                                                                                                                                                                                                                                                                                                                                                                                                                                                                                                                                                                                                                                                                                                                                                                                                                                                                                                                                                                                                                                                                                                                                                                                                                                                                                                                                                                                                                                                                                                                                                                                                                                                                                                                                                                                                                                                                                                                                                                                                                                                                                                                                                                                                                                                                                                                                                                                                                                                                                                                                                                                                                                                                                                                                                                                                                                                                                                                                                                                                                                                                                                                                                                                                                                                                                                                                                                                                                                                                                                                                                                                                                                                                                                                                                                                                                                                                                                                                                                                                                                                                                                                                                                                                                                                                                                                                                                                                                                                                                                                                                                                                                                                                                                                                                                                                                                                                                                                                                                                                                                                                                                                                                                                                                                                                                                                                                                                                                                                                                                                                                                                                                                                                                                                                                                                                                                                                                                                                                                                                                                                                                                                                                                                                                                                                                                                                                                                                                                                                                                                                                                                                                                                                                                                                                                                                                                                                                                                                                                                                                                                                                                                                                                                                                                                                                                                                                                                                                                                                                                                                                                                                                                                                                                                                                                                                                                                                                                                                                                                                                                                                                                                                                                                                                                                                                                                                                                                                                                                                                                                                                                                                                                                                                                                         | <a href="#">FBgn0028662</a>                            |
| Predicted function                                                                                                                                                                                                                                                                                                                                                                                                                                                                                                                                                                                                                                                                                                                                                                                                                                                                                                                                                                                                                                                                                                                                                                                                                                                                                                                                                                                                                                                                                                                                                                                                                                                                                                                                                                                                                                                                                                                                                                                                                                                                                                                                                                                                                                                                                                                                                                                                                                                                                                                                                                                                                                                                                                                                                                                                                                                                                                                                                                                                                                                                                                                                                                                                                                                                                                                                                                                                                                                                                                                                                                                                                                                                                                                                                                                                                                                                                                                                                                                                                                                                                                                                                                                                                                                                                                                                                                                                                                                                                                                                                                                                                                                                                                                                                                                                                                                                                                                                                                                                                                                                                                                                                                                                                                                                                                                                                                                                                                                                                                                                                                                                                                                                                                                                                                                                                                                                                                                                                                                                                                                                                                                                                                                                                                                                                                                                                                                                                                                                                                                                                                                                                                                                                                                                                                                                                                                                                                                                                                                                                                                                                                                                                                                                                                                                                                                                                                                                                                                                                                                                                                                                                                                                                                                                                                                                                                                                                                                                                                                                                                                                                                                                                                                                                                                                                                                                                                                                                                                                                                                                                                                                                                                                                                                                                                                                                                                                                                                                                                                                                                                                                                                                                                                                                                                                                                                                                                                                                                                                                                                                                                                                                                                                                                                                                                                                                                                                                                                                                                                                                                                                                                                                                                                                                                                                                                                                                                                                                                                                                                                                                                                                                                                                                                                                                                                                                                                                                                                                                                                                                                                                                                                                                                                                                                                                                                                                                                                                                                                                                                                                                                 | ATPase, H+ transporting, lysosomal 21kDa, V0 subunit b |
| Atp6v0c CLEAR element conservation:                                                                                                                                                                                                                                                                                                                                                                                                                                                                                                                                                                                                                                                                                                                                                                                                                                                                                                                                                                                                                                                                                                                                                                                                                                                                                                                                                                                                                                                                                                                                                                                                                                                                                                                                                                                                                                                                                                                                                                                                                                                                                                                                                                                                                                                                                                                                                                                                                                                                                                                                                                                                                                                                                                                                                                                                                                                                                                                                                                                                                                                                                                                                                                                                                                                                                                                                                                                                                                                                                                                                                                                                                                                                                                                                                                                                                                                                                                                                                                                                                                                                                                                                                                                                                                                                                                                                                                                                                                                                                                                                                                                                                                                                                                                                                                                                                                                                                                                                                                                                                                                                                                                                                                                                                                                                                                                                                                                                                                                                                                                                                                                                                                                                                                                                                                                                                                                                                                                                                                                                                                                                                                                                                                                                                                                                                                                                                                                                                                                                                                                                                                                                                                                                                                                                                                                                                                                                                                                                                                                                                                                                                                                                                                                                                                                                                                                                                                                                                                                                                                                                                                                                                                                                                                                                                                                                                                                                                                                                                                                                                                                                                                                                                                                                                                                                                                                                                                                                                                                                                                                                                                                                                                                                                                                                                                                                                                                                                                                                                                                                                                                                                                                                                                                                                                                                                                                                                                                                                                                                                                                                                                                                                                                                                                                                                                                                                                                                                                                                                                                                                                                                                                                                                                                                                                                                                                                                                                                                                                                                                                                                                                                                                                                                                                                                                                                                                                                                                                                                                                                                                                                                                                                                                                                                                                                                                                                                                                                                                                                                                                                                                |                                                        |
| <div> <div>5' / 5' UTR</div> <div> <div>Mdom\</div> <div>AGCAGCACTTGA</div> <div>TCATGTGA</div> <div>TTAAGGCTGAAA</div> </div> </div> <div> <div>Ccap\</div> <div>GAAATTGTTTC</div> <div>ATCAGCTGA</div> <div>TGCAAGGC GAAT</div> </div> <div> <div>Ccap\</div> <div>GTTGTTTTTCTG</div> <div>TCATGTGA</div> <div>TGAGTAAAGTTT</div> </div> <div> <div>Gmor\</div> <div>TGCAACACTTC</div> <div>ATCATGTGA</div> <div>TTAAATGAAGAA</div> </div> <div> <div>Llon\</div> <div>GACTTCACACCA</div> <div>TCACGTGA</div> <div>AAAATTCTTCGAT</div> </div> <div> <div>Ppap\</div> <div>AGCTGACATCA</div> <div>ATCACGTGA</div> <div>AAAGTGGCCGTC</div> </div> <div> <div>Agam\</div> <div>T</div> <div>TC</div> <div>TT</div> <div>TG</div> <div>CT</div> <div>CGG</div> <div>TC</div> <div>AT</div> <div>TGA</div> <div>CG</div> <div>TC</div> <div>TT</div> <div>GAT</div> <div>C</div> <div>TT</div> </div> <div> <div>Aara\</div> <div>T</div> <div>TC</div> <div>TT</div> <div>TG</div> <div>CT</div> <div>CGG</div> <div>TC</div> <div>AT</div> <div>TGA</div> <div>CG</div> <div>TC</div> <div>TT</div> <div>GAT</div> <div>C</div> <div>TT</div> </div> <div> <div>Aqan\</div> <div>T</div> <div>TC</div> <div>TT</div> <div>TG</div> <div>CT</div> <div>CGG</div> <div>TC</div> <div>AT</div> <div>TGA</div> <div>CG</div> <div>TC</div> <div>TT</div> <div>GAT</div> <div>C</div> <div>TT</div> </div> <div> <div>Achr\</div> <div>T</div> <div>TC</div> <div>TT</div> <div>TCT</div> <div>CGG</div> <div>TC</div> <div>AT</div> <div>TGA</div> <div>CG</div> <div>TC</div> <div>TT</div> <div>GAT</div> <div>C</div> <div>TT</div> </div> <div> <div>Aepi\</div> <div>CT</div> <div>CT</div> <div>TTT</div> <div>CT</div> <div>TGG</div> <div>TC</div> <div>AT</div> <div>TGA</div> <div>CG</div> <div>TC</div> <div>TT</div> <div>GAT</div> <div>C</div> <div>TT</div> </div> <div> <div>Amin\</div> <div>CT</div> <div>CT</div> <div>TTT</div> <div>CT</div> <div>CGG</div> <div>TC</div> <div>AT</div> <div>TGA</div> <div>CG</div> <div>TC</div> <div>TT</div> <div>GAT</div> <div>C</div> <div>TT</div> </div> <div> <div>Afun\</div> <div>CT</div> <div>CT</div> <div>TTT</div> <div>CT</div> <div>CGG</div> <div>TC</div> <div>AT</div> <div>TGA</div> <div>CG</div> <div>TC</div> <div>TT</div> <div>GAT</div> <div>C</div> <div>TT</div> </div> <div> <div>Aste\</div> <div>CT</div> <div>CT</div> <div>TTT</div> <div>CT</div> <div>CGG</div> <div>TC</div> <div>AT</div> <div>TGA</div> <div>CG</div> <div>TC</div> <div>CA</div> <div>GAT</div> <div>C</div> <div>TT</div> </div> <div> <div>Adir\</div> <div>T</div> <div>CT</div> <div>C</div> <div>TTTT</div> <div>TC</div> <div>CGG</div> <div>TC</div> <div>AT</div> <div>TGA</div> <div>CA</div> <div>TC</div> <div>GAG</div> <div>AG</div> <div>AT</div> <div>C</div> </div> <div> <div>Anil\</div> <div>T</div> <div>A</div> <div>T</div> <div>C</div> <div>TTTT</div> <div>CT</div> <div>G</div> <div>TC</div> <div>AT</div> <div>TGA</div> <div>CA</div> <div>TC</div> <div>GGG</div> <div>A</div> <div>CA</div> <div>T</div> </div> <div> <div>Aalb\</div> <div>CT</div> <div>TC</div> <div>TTT</div> <div>GC</div> <div>GGG</div> <div>TC</div> <div>AT</div> <div>TGA</div> <div>CA</div> <div>TC</div> <div>GGG</div> <div>A</div> <div>TC</div> <div>TT</div> </div> <div> <div>Adar\</div> <div>CT</div> <div>TC</div> <div>TTT</div> <div>GC</div> <div>GGG</div> <div>TC</div> <div>AT</div> <div>TGA</div> <div>CA</div> <div>TC</div> <div>GGG</div> <div>A</div> <div>TC</div> <div>TT</div> </div> <div> <div>Aaeg\</div> <div>T</div> <div>CT</div> <div>C</div> <div>TG</div> <div>TGG</div> <div>TC</div> <div>AT</div> <div>TGA</div> <div>CA</div> <div>TC</div> <div>AA</div> <div>AG</div> <div>AT</div> <div>C</div> </div> <div> <div>Cqui\</div> <div>C</div> <div>AG</div> <div>T</div> <div>GAG</div> <div>G</div> <div>GG</div> <div>TC</div> <div>AT</div> <div>TGA</div> <div>T</div> <div>A</div> <div>C</div> <div>G</div> <div>GGG</div> <div>A</div> <div>T</div> </div> <div> <div>Mdes\</div> <div>T</div> <div>G</div> <div>C</div> <div>G</div> <div>CA</div> <div>A</div> <div>T</div> <div>C</div> <div>T</div> <div>C</div> <div>G</div> <div>TC</div> <div>CA</div> <div>T</div> <div>G</div> <div>A</div> </div> <div> <div>TT</div> <div>TC</div> <div>AT</div> <div>TC</div> <div>AT</div> </div> <div> <div>Bmor\</div> <div>G</div> <div>A</div> <div>C</div> <div>A</div> <div>T</div> <div>C</div> <div>T</div> <div>T</div> <div>G</div> <div>T</div> <div>G</div> <div>A</div> <div>T</div> <div>C</div> <div>A</div> <div>A</div> <div>G</div> </div> <div> <div>CC</div> <div>TC</div> <div>T</div> <div>C</div> <div>CG</div> <div>T</div> <div>TT</div> <div>T</div> </div> <div> <div>Msex\</div> <div>G</div> <div>A</div> <div>C</div> <div>A</div> <div>T</div> <div>C</div> <div>T</div> <div>T</div> <div>G</div> <div>T</div> <div>G</div> <div>A</div> <div>T</div> <div>C</div> <div>A</div> <div>A</div> <div>G</div> </div> <div> <div>CC</div> <div>TC</div> <div>T</div> <div>C</div> <div>CG</div> <div>T</div> <div>TT</div> <div>T</div> </div> <div> <div>Hmel\</div> <div>G</div> <div>A</div> <div>C</div> <div>A</div> <div>T</div> <div>C</div> <div>T</div> <div>T</div> <div>G</div> <div>T</div> <div>G</div> <div>A</div> <div>T</div> <div>C</div> <div>A</div> <div>A</div> <div>G</div> </div> <div> <div>CT</div> <div>TC</div> <div>C</div> <div>CG</div> <div>T</div> <div>TT</div> <div>T</div> </div> <div> <div>Dple\</div> <div>G</div> <div>A</div> <div>C</div> <div>G</div> <div>T</div> <div>C</div> <div>T</div> <div>T</div> <div>G</div> <div>T</div> <div>G</div> <div>A</div> <div>T</div> <div>C</div> <div>A</div> <div>A</div> <div>G</div> </div> <div> <div>CT</div> <div>TC</div> <div>C</div> <div>CG</div> <div>T</div> <div>TT</div> <div>T</div> </div> <div> <div>Pxyl\</div> <div>G</div> <div>A</div> <div>C</div> <div>A</div> <div>T</div> <div>C</div> <div>T</div> <div>T</div> <div>G</div> <div>T</div> <div>G</div> <div>A</div> <div>T</div> <div>C</div> <div>A</div> <div>A</div> <div>G</div> </div> <div> <div>CT</div> <div>TC</div> <div>C</div> <div>CG</div> <div>T</div> <div>TT</div> <div>T</div> </div> <div> <div>Tcas\</div> <div>g</div> <div>c</div> <div>a</div> <div>a</div> <div>g</div> <div>t</div> <div>t</div> <div>g</div> <div>t</div> <div>a</div> <div>c</div> <div>T</div> <div>C</div> <div>A</div> <div>G</div> <div>T</div> <div>G</div> </div> <div> <div>A</div> <div>g</div> <div>t</div> <div>c</div> <div>c</div> <div>a</div> <div>a</div> <div>t</div> <div>t</div> <div>a</div> <div>t</div> </div> <div> <div>Dpon\</div> <div>t</div> <div>t</div> <div>t</div> <div>g</div> <div>a</div> <div>c</div> <div>a</div> <div>t</div> <div>t</div> <div>a</div> <div>T</div> <div>C</div> <div>A</div> <div>T</div> <div>G</div> <div>T</div> <div>G</div> </div> <div> <div>A</div> <div>t</div> <div>a</div> <div>t</div> <div>t</div> <div>g</div> <div>t</div> <div>c</div> <div>a</div> <div>t</div> <div>c</div> <div>a</div> </div> <div> <div>Amel\</div> <div>T</div> <div>A</div> <div>A</div> <div>G</div> <div>A</div> <div>T</div> <div>A</div> <div>A</div> <div>C</div> <div>G</div> <div>T</div> <div>C</div> <div>A</div> <div>T</div> <div>G</div> <div>A</div> </div> <div> <div>T</div> <div>A</div> <div>A</div> <div>A</div> <div>C</div> <div>G</div> <div>G</div> <div>T</div> <div>G</div> </div> <div> <div>Aflo\</div> <div>T</div> <div>A</div> <div>A</div> <div>G</div> <div>A</div> <div>T</div> <div>A</div> <div>A</div> <div>C</div> <div>G</div> <div>T</div> <div>C</div> <div>A</div> <div>T</div> <div>G</div> <div>A</div> </div> <div> <div>T</div> <div>A</div> <div>A</div> <div>A</div> <div>C</div> <div>G</div> <div>G</div> <div>T</div> <div>G</div> </div> <div> <div>Bter\</div> <div>G</div> <div>A</div> <div>A</div> <div>T</div> <div>A</div> <div>A</div> <div>C</div> <div>G</div> <div>T</div> <div>C</div> <div>A</div> <div>T</div> <div>G</div> <div>A</div> </div> <div> <div>T</div> <div>A</div> <div>A</div> <div>A</div> <div>C</div> <div>G</div> <div>G</div> <div>T</div> <div>G</div> </div> <div> <div>Bimp\</div> <div>G</div> <div>A</div> <div>A</div> <div>T</div> <div>A</div> <div>A</div> <div>C</div> <div>G</div> <div>T</div> <div>C</div> <div>A</div> <div>T</div> <div>G</div> <div>A</div> </div> <div> <div>T</div> <div>A</div> <div>A</div> <div>A</div> <div>C</div> <div>G</div> <div>G</div> <div>T</div> <div>G</div> </div> <div> <div>Mrot\</div> <div>G</div> <div>A</div> <div>T</div> <div>T</div> <div>G</div> <div>C</div> <div>T</div> <div>A</div> <div>G</div> <div>C</div> <div>T</div> <div>A</div> <div>T</div> <div>G</div> </div> <div> <div>T</div> <div>A</div> <div>G</div> <div>A</div> <div>C</div> <div>G</div> <div>G</div> <div>T</div> <div>G</div> </div> <div> <div>Aech\</div> <div>T</div> <div>A</div> <div>C</div> <div>G</div> <div>A</div> <div>G</div> <div>C</div> <div>T</div> <div>C</div> <div>G</div> <div>T</div> <div>C</div> <div>A</div> <div>T</div> <div>G</div> </div> <div> <div>C</div> <div>A</div> <div>G</div> <div>C</div> <div>G</div> <div>G</div> <div>T</div> <div>G</div> </div> <div> <div>Pbar\</div> <div>C</div> <div>T</div> <div>C</div> <div>G</div> <div>A</div> <div>G</div> <div>C</div> <div>T</div> <div>C</div> <div>G</div> <div>T</div> <div>C</div> <div>A</div> <div>T</div> <div>G</div> </div> <div> <div>C</div> <div>A</div> <div>G</div> <div>C</div> <div>G</div> <div>G</div> <div>T</div> <div>G</div> </div> <div> <div>Cflo\</div> <div>A</div> <div>G</div> <div>C</div> <div>C</div> <div>A</div> <div>G</div> <div>C</div> <div>T</div> <div>C</div> <div>G</div> <div>T</div> <div>C</div> <div>A</div> <div>T</div> <div>G</div> </div> <div> <div>C</div> <div>G</div> <div>G</div> <div>C</div> <div>G</div> <div>G</div> <div>T</div> <div>G</div> </div> <div> <div>Lhum\</div> <div>C</div> <div>G</div> <div>C</div> <div>A</div> <div>T</div> <div>C</div> <div>A</div> <div>G</div> <div>T</div> <div>C</div> <div>G</div> <div>T</div> <div>C</div> <div>A</div> <div>T</div> </div> <div> <div>T</div> <div>A</div> <div>T</div> <div>C</div> <div>G</div> <div>A</div> <div>C</div> <div>G</div> <div>G</div> <div>T</div> <div>G</div> </div> <div> <div>Hsal\</div> <div>A</div> <div>G</div> <div>A</div> <div>C</div> <div>C</div> <div>T</div> <div>T</div> <div>G</div> <div>T</div> <div>G</div> <div>T</div> <div>C</div> <div>A</div> <div>T</div> <div>G</div> </div> <div> <div>T</div> <div>A</div> <div>C</div> <div>G</div> <div>A</div> <div>C</div> <div>G</div> <div>G</div> <div>T</div> <div>G</div> </div> <div> <div>Acep\</div> <div>G</div> <div>T</div> <div>G</div> <div>A</div> <div>C</div> <div>A</div> <div>T</div> <div>G</div> <div>C</div> <div>A</div> <div>T</div> <div>G</div> <div>A</div> </div> <div> <div>T</div> <div>T</div> <div>T</div> <div>A</div> <div>G</div> <div>A</div> <div>A</div> <div>G</div> <div>A</div> <div>G</div> </div> <div> <div>Sinv\</div> <div>C</div> <div>C</div> <div>G</div> <div>A</div> <div>G</div> <div>T</div> <div>G</div> <div>T</div> <div>C</div> <div>G</div> <div>T</div> <div>C</div> <div>A</div> <div>T</div> </div> <div> <div>C</div> <div>C</div> <div>A</div> <div>C</div> <div>A</div> <div>T</div> <div>G</div> <div>A</div> <div>C</div> <div>G</div> </div> |                                                        |

Ngir\ CAGAGATGGTCGTCACATGACAGCGACGGGTG  
 Nlon\ CAGAGATGGTCGTCACATGACAGCGACGGGTG  
 Nvit\ CAGAGATGGTCGTCACATGACAGCGACGGGTG  
  
 Lful\ caagtcttaaagTCACATGAttatttagagca  
 Phum\ ggttgctcgaagTCATATGActtctgcttaaa  
 Dpul\ gtgagacaaaaTCACATGAcagatcccttcc  
 Isca\ ggggtgacttgTCATGGGAcctcatctgtct

### Atp6v0b gene structure comparisons:

(Click on orthologs for genomic, mRNA and protein sequence informations)

Key: UTR region, CDS region

| Order                   | Species                          | Atp6v0b orthologs                             | 5' exon | intron | exon3' |     |           | Extended CLEAR region                                           | Position | bps from TSS |
|-------------------------|----------------------------------|-----------------------------------------------|---------|--------|--------|-----|-----------|-----------------------------------------------------------------|----------|--------------|
| Diptera (Drosophilidae) | <i>Drosophila_melanogaster</i>   | <a href="#">Dmel\VhaPPA1-1</a>                | 124     | 59     | 19     | 639 | 502       | agaaaatgtacgTCATGTGAttgtggattctt                                | 5'UTR    | 47           |
| Diptera (Muscidae)      | <i>Musca_domestica</i>           | <a href="#">Mdom\Atp6v0b</a>                  |         |        |        | 636 |           | agcagcacttgaTCATGTGAttaaggctgaaa                                | 5'UTR?   | >-190        |
| Diptera ( Tephritidae)  | <i>Ceratitis_capitata</i>        | <a href="#">Ccap\Atp6v0b</a>                  | 26      | 92     | 22     | 639 | 159       | gaaattgtttcaTCAGCTGAtgcaaggcgaatgttgttttctgTCATGTGAtgagtaaagttt | 5' 5'    | -507 -25     |
| Diptera (Glossinidae)   | <i>Glossina_morsitans</i>        | <a href="#">Gmor\ATP6V0b-1<br/>TMP003354*</a> |         |        | 113    | 636 | 21+70+160 | tgcaaacactcaTCATGTGAttaaatgaagaa                                | 5'       | 66           |
|                         |                                  | <a href="#">Gmor\ATP6V0b-2<br/>TMP003353</a>  |         |        |        | 648 |           | ND                                                              |          |              |
| Diptera (Psychodidae)   | <i>Lutzomyia_longipalpis</i>     | <a href="#">Llon\Atp6v0b</a>                  |         |        | 191    | 630 | 175       | gacttcacaccaTCACGTGAaaattcttcgat                                | 5'       | -8           |
|                         | <i>Phlebotomus_papatasi</i>      | <a href="#">Ppap\Atp6v0b</a>                  |         |        |        | 630 |           | agctgacatcaaTCACGTGAaaagtggccgtc                                | 5'       | >-256        |
|                         |                                  |                                               |         |        |        |     |           |                                                                 |          |              |
| Diptera (Culicidae)     | <i>Anopheles_gambiae</i>         | <a href="#">Agam\Atp6v0b<br/>AGAP009334</a>   | 77      | 83     | 12     | 627 | 151+75+47 | ttctttgctcggTCATATGAcgtcttgatctt                                | 5'       | -1           |
|                         | <i>Anopheles_arabiensis</i>      | <a href="#">Aara\Atp6v0b</a>                  |         |        |        | 627 |           | ttctttgctcggTCATATGAcgtcttgatctt                                | 5'       | >-173        |
|                         | <i>Anopheles_quadriannulatus</i> | <a href="#">Aqan\Atp6v0b</a>                  |         |        |        | 627 |           | ttctttgctcggTCATATGAcgtcttgatctt                                | 5'       | >-173        |
|                         | <i>Anopheles_christyi</i>        | <a href="#">Achr\Atp6v0b</a>                  |         |        |        | 627 |           | ttcttttctcggTCATATGAcgtcttgatctt                                | 5'       | >-163        |
|                         | <i>Anopheles_epiroticus</i>      | <a href="#">Aepi\Atp6v0b</a>                  |         |        |        | 627 |           | ctcttttcttggTCATATGAcgtcttgatctt                                | 5'       | >-157        |
|                         | <i>Anopheles_minimus</i>         | <a href="#">Amin\Atp6v0b</a>                  |         |        |        | 627 |           | ctcttttctcggTCATATGAcgtcttgatctt                                | 5'       | >-148        |
|                         | <i>Anopheles_funestus</i>        | <a href="#">Afun\Atp6v0b</a>                  |         |        |        | 627 |           | ctcttttctcggTCATATGAcgtcttgatctt                                | 5'       | >-147        |
|                         | <i>Anopheles_stephensi</i>       | <a href="#">Aste\Atp6v0b</a>                  |         |        | 10     | 627 |           | ctcttttctcggTCATATGAcgtccagatctt                                | 5'       | >-152        |
|                         | <i>Anopheles_dirus</i> A         | <a href="#">Adir\Atp6v0b</a>                  |         |        |        | 627 |           | tctctttttcggTCATATGAcatcgagagatc                                | 5'       | >-160        |
|                         | <i>Anopheles_nili</i>            | <a href="#">Anil\Atp6v0b</a>                  |         |        |        | 627 |           | tatctttttctggTCATATGAcatcgggaacat                               | 5'       | >-157        |
|                         | <i>Anopheles_albimanus</i>       | <a href="#">Aalb\Atp6v0b</a>                  |         |        |        | 627 |           | cttctttgcgggTCATATGAcatcgggatctt                                | 5'       | >-121        |

|                             |                                |                                               |                              |    |     |     |     |    |      |    |     |     |     |     |     |           |                                                                     |                                                                     |                                  |  |          |                   |
|-----------------------------|--------------------------------|-----------------------------------------------|------------------------------|----|-----|-----|-----|----|------|----|-----|-----|-----|-----|-----|-----------|---------------------------------------------------------------------|---------------------------------------------------------------------|----------------------------------|--|----------|-------------------|
|                             | <i>Anopheles_darlingi</i>      | <a href="#">Adar\Atp6v0b</a>                  |                              |    |     | 627 |     |    |      |    |     |     |     |     |     |           | cttctttgcgggTCATATGAcatcgggatctt                                    |                                                                     |                                  |  | 5'       | >-119             |
|                             | <i>Aedes_aegypti</i>           | <a href="#">Aaeg\Atp6v0b<br/>AAEL012113</a>   | 54                           | 77 | 15  | 627 |     |    |      |    |     |     |     |     |     | 55+62+179 | tctctctgtgggTCATATGAcatcaaaggatc                                    |                                                                     |                                  |  | 5'       | -16               |
|                             | <i>Culex_pipiens_qui.</i>      | <a href="#">Cqui\Atp6v0b<br/>CPI004794</a>    |                              |    |     | 627 |     |    |      |    |     |     |     |     |     | 59+67+441 | cagtgaggagggTCATATGAtacacgggggat                                    |                                                                     |                                  |  | 5'       | >-155             |
|                             |                                |                                               |                              |    |     |     |     |    |      |    |     |     |     |     |     |           |                                                                     |                                                                     |                                  |  |          |                   |
| Diptera<br>(Cecidomyiidae)  | <i>Mayetiola_destructor</i>    | <a href="#">Mdes\Atp6v0b</a>                  |                              |    |     | 624 |     |    |      |    |     |     |     |     |     |           | tgcgcaatctcgTCACATGAttttcatacat<br>attttgctgctgTCACATGAaataacatcaga |                                                                     |                                  |  | 5'<br>5' | >-241<br>>-211    |
|                             | Lepidoptera                    | <i>Bombyx_mori</i>                            | <a href="#">Bmor\Atp6v0b</a> |    |     | 132 | 618 |    |      |    |     |     |     |     |     |           |                                                                     | gacatcttgtaTCAACAAGAcctctccgtttt                                    |                                  |  |          | 5'UTR             |
| <i>Manduca sexta</i>        |                                | <a href="#">Msex\Atp6v0b</a>                  |                              |    |     | 618 |     |    |      |    |     |     |     |     |     |           | gacatcttgtaTCAACAAGAcctctccgtttt                                    |                                                                     |                                  |  | 5'       | >-110             |
| <i>Danaus_plexippus</i>     |                                | <a href="#">Dple\Atp6v0b</a>                  |                              |    |     | 618 |     |    |      |    |     |     |     |     |     |           | gacgtcttgtaTCAACAAGActctcgtttt                                      |                                                                     |                                  |  | 5'       | >-107             |
| <i>Heliconius_melpomene</i> |                                | <a href="#">HmeI\Atp6v0b</a>                  |                              |    |     | 618 |     |    |      |    |     |     |     |     |     |           | gacatcttgtaTCAACAAGActtctccgtttt                                    |                                                                     |                                  |  | 5'       | >-109             |
| <i>Plutella_xylostella</i>  |                                | <a href="#">Pxyl\Atp6v0b</a>                  |                              |    | 93  | 618 |     |    |      |    |     |     |     |     |     | 31        | gacatcttgtaTCAACAAGActtctctcta                                      |                                                                     |                                  |  | 5'       | >-14              |
|                             |                                |                                               |                              |    |     |     |     |    |      |    |     |     |     |     |     |           |                                                                     |                                                                     |                                  |  |          |                   |
| Strepsiptera                | <i>Mengenilla_moldrzyki</i>    | <a href="#">Mmol\Atp6v0b</a>                  |                              |    |     | 61  | 49  | 49 | 1722 | 84 | 50  | 148 | 52  | 243 |     | ND        |                                                                     | ND                                                                  |                                  |  |          |                   |
| Coleoptera                  | <i>Tribolium_castaneum</i>     | <a href="#">Tcas\Atp6v0b<br/>TC000524</a>     | 138                          | 54 | 11  | 630 |     |    |      |    |     |     |     |     |     |           | gcaaggtgtgacTCACGTGAgtcgaattatta                                    |                                                                     |                                  |  | 5'UTR    | 26                |
|                             | <i>Dendroctonus_ponderosae</i> | <a href="#">Dponl\Atp6v0b</a>                 |                              |    | 91  | 61  | 85  | 49 | 79   | 84 | 671 | 148 | 204 | 246 | 139 | 33        | 50                                                                  | ttttgacatttaTCATGTGAttattgcatca<br>cgtgatcaacagTCATATGAttccatttattt |                                  |  |          | 5'UTR<br>intron 1 |
|                             |                                |                                               |                              |    |     |     |     |    |      |    |     |     |     |     |     |           |                                                                     |                                                                     |                                  |  |          |                   |
| Hymenoptera                 | <i>Apis_mellifera</i>          | <a href="#">AmeI\Atp6vob<br/>GB17836</a>      |                              |    | 181 | 61  | 151 | 49 | 79   | 84 | 66  | 397 |     |     |     | 64        | 33                                                                  | 65                                                                  | taagagtaaacgTCACATGAtaaaacgggtg  |  | 5'UTR    | 7                 |
|                             | <i>Apis_florea</i>             | <a href="#">Aflo\Atp6v0b</a>                  |                              |    |     | 61  | 151 | 49 | 83   | 84 | 62  | 397 |     |     |     | 63        | 33                                                                  |                                                                     | taagagtaaacgTCACATGAtaaaacgggtg  |  | 5'UTR?   | >-170             |
|                             | <i>Bombus_terrestris</i>       | <a href="#">Bter\Atp6v0b<br/>LOC100646695</a> |                              |    |     | 61  | 200 | 49 | 109  | 84 | 81  | 394 |     |     |     | 64        | 33                                                                  |                                                                     | gaatactaaacgTCACATGAtaaaaacgggtg |  | 5'       | >-173             |
|                             | <i>Bombus_impatiens</i>        | <a href="#">Bimp\Atp6v0b</a>                  |                              |    |     | 61  | 201 | 49 | 117  | 84 | 97  | 394 |     |     |     | 64        | 33                                                                  |                                                                     | gaatactaaacgTCACATGAtaaaaacgggtg |  | 5'       | >-173             |
|                             | <i>Megachile_rotundata</i>     | <a href="#">Mrrot\Atp6v0b</a>                 |                              |    |     | 61  | 167 | 49 | 94   | 84 | 75  | 397 |     |     |     | 82        | 33                                                                  |                                                                     | gattgctagacgTCACATGAtagagacgggtg |  | 5'       | >-168             |
|                             | <i>Acromyrmex_echinator</i>    | <a href="#">Aech\Atp6v0b</a>                  |                              |    |     | 61  | 292 | 49 | 95   | 84 | 212 | 400 |     |     |     | 103       | 36                                                                  |                                                                     | tacgagcagtcgTCACATGAcagcgacgggtg |  | 5'       | >-182             |
|                             | <i>Atta_cephalotes</i>         | <a href="#">Acep\Atp6v0b</a>                  |                              |    |     | 61  | 246 | 49 | 95   | 84 | 220 | 400 |     |     |     | 100       | 36                                                                  |                                                                     | gtgacatgacagTCATATGAttttagaagg   |  | 5'       | >-181             |
|                             | <i>Solenopsis_invicta</i>      | <a href="#">Sinv\Atp6v0b</a>                  |                              |    | 132 | 73  | 192 | 49 | 89   | 84 | 65  | 400 |     |     |     | 151       | 36                                                                  |                                                                     | ccgaagtggctgTCATATGAccacacatgacg |  | 5'       | -47               |
|                             | <i>Pogonomyrmex_barbatus</i>   | <a href="#">Pbar\Atp6v0b</a>                  |                              |    |     | 61  | 267 | 49 | 93   | 84 | 80  | 400 |     |     |     | 130       | 33                                                                  |                                                                     | ctcgagcagtcgTCACATGAcagcgacgggtg |  | 5'       | >-152             |
|                             | <i>Camponotus_floridanus</i>   | <a href="#">Cflo\Atp6v0b</a>                  |                              |    |     | 61  | 216 | 49 | 101  | 84 | 79  | 400 |     |     |     | 676       | 33                                                                  |                                                                     | agccagcagtcgTCACATGAcggcgacgggtg |  | 5'       | >-159             |
|                             | <i>Linepithema_humile</i>      | <a href="#">Lhum\Atp6v0b</a>                  |                              |    |     | 61  | 173 | 49 | 100  | 84 | 77  | 400 |     |     |     | 322       | 33                                                                  |                                                                     | cgccatcagtcgTCACATGAtatcgacgggtg |  | 5'       | >-163             |
|                             | <i>Harpegnathos_saltator</i>   | <a href="#">Hsal\Atp6v0b</a>                  |                              |    |     | 61  | 163 | 49 | 90   | 84 | 74  | 403 |     |     |     | 89        | 30                                                                  |                                                                     | agaccttggttgTCACATGAtaacgacgggtg |  | 5'       | >-167             |
|                             | <i>Nasonia_vitripennis</i>     | <a href="#">Nvit\Atp6v0b<br/>NV12316</a>      |                              |    | 118 | 67  | 99  | 49 | 117  | 84 | 84  | 400 |     |     |     | 82        | 36                                                                  | 661                                                                 | cagagatggtcgTCACATGAcagcgacgggtg |  | 5'       | -52               |
|                             | <i>Nasonia_giraulti</i>        | <a href="#">Ngir\Atp6v0b</a>                  |                              |    |     | 67  | 99  | 49 | 115  | 84 | 84  | 400 |     |     |     | 82        | 36                                                                  |                                                                     | cagagatggtcgTCACATGAcagcgacgggtg |  | 5'       | >-170             |
|                             | <i>Nasonia_longicornis</i>     | <a href="#">Nlon\Atp6v0b</a>                  |                              |    |     | 67  | 99  | 49 | 115  | 84 | 84  | 400 |     |     |     | 82        | 36                                                                  |                                                                     | cagagatggtcgTCACATGAcagcgacgggtg |  | 5'       | >-172             |

|              |                               |                                              |  |  |     |     |     |    |     |     |      |               |      |     |      |                |      |                |                                  |     |      |                                  |                                                                      |          |                                |                                                                     |          |                |  |
|--------------|-------------------------------|----------------------------------------------|--|--|-----|-----|-----|----|-----|-----|------|---------------|------|-----|------|----------------|------|----------------|----------------------------------|-----|------|----------------------------------|----------------------------------------------------------------------|----------|--------------------------------|---------------------------------------------------------------------|----------|----------------|--|
|              |                               |                                              |  |  |     |     |     |    |     |     |      |               |      |     |      |                |      |                |                                  |     |      |                                  |                                                                      |          |                                |                                                                     |          |                |  |
| Hemiptera    | <i>Acyrtosiphon_pisum</i>     | <a href="#">Apis\Atp6v0b<br/>ACYPI006833</a> |  |  | 113 | 627 |     |    |     |     |      |               |      |     |      |                |      |                |                                  | 693 |      | ND                               |                                                                      |          |                                |                                                                     |          |                |  |
|              | <i>Rhodnius_prolixus</i>      | <a href="#">Rpro\Atp6v0b</a>                 |  |  |     | 633 |     |    |     |     |      |               |      |     |      |                |      |                |                                  |     |      | ND                               |                                                                      |          |                                |                                                                     |          |                |  |
| Phthiraptera | <i>Pediculus_humanus</i>      | <a href="#">Phum\Atp6v0b</a>                 |  |  |     | 211 |     |    |     | 114 | 410  |               |      |     |      |                |      |                | ggttgctcgaagTCATATGActtctgcttaaa | 5'  | >-78 |                                  |                                                                      |          |                                |                                                                     |          |                |  |
| Odonata      | <i>Ladona_fulva</i>           | <a href="#">Lful\Atp6v0b</a>                 |  |  |     | 61  | 995 | 49 | 87  | 84  | 1022 | 148           |      | 249 | 133? |                | 1182 | 116            |                                  | 101 | 30?  |                                  | aataagctctcaTCACGTGAAatgttctatga<br>caagtcctaaagTCACATGAttatttagagca | 5'<br>5' | >-394<br>>-72                  |                                                                     |          |                |  |
| Crustacea    | <i>Daphnia_pulex</i>          | <a href="#">Dpu\Atp6v0b</a>                  |  |  | 73  | 73  | 86  | 49 | 63  | 84  | 72   | 148(78+70)    |      | 64  | 130  |                | 64   | 116            |                                  | 68  | 30   | 220                              | gtgagacaaaaTCACATGAcagatcccttcc                                      | 5'       | -33                            |                                                                     |          |                |  |
| Ixodida      | <i>Ixodes_scapularis</i>      | <a href="#">Isca\Atp6v0b<br/>ISCW018464*</a> |  |  | 70  | 67  | 134 | 49 | ND  | 84  | 2804 | 203(78+70+55) |      |     | 113  | 191 (79+46+66) |      |                | 1876                             | 39  | 302  | gggtgtgacttgTCATGGGAcctcatctgtct | 5'                                                                   | 26       |                                |                                                                     |          |                |  |
|              |                               |                                              |  |  |     |     |     |    |     |     |      |               |      |     |      |                |      |                |                                  |     |      |                                  |                                                                      |          |                                |                                                                     |          |                |  |
|              | <i>Homo_sapiens</i>           | <a href="#">ATP6V0B</a>                      |  |  | 111 | 67  | 692 | 49 | 241 | 84  | 128  | 78            | 210  | 70  | 113  | 52             | 201  | 191 (79+46+66) |                                  |     |      | 764                              | 27                                                                   | 293      | ggTCACGTGGTaccggcgcaTCACGTGGgc |                                                                     |          |                |  |
| Cnidaria     | <i>Nematostella_vectensis</i> | <a href="#">_vlg200737</a>                   |  |  | 87  | 79  | 268 | 49 | 110 | 84  | 881  | 78            | 7205 | 70  | 329  | 58             | 244  | 79             | 2104                             | 46  | 169  | 66                               | 73                                                                   | 30       |                                | taagcacaagtgTCACATGAgcaaggaggagaaa                                  | 5'UTR    | 1              |  |
| Placozoa     | <i>Trichoplax_adhaerens</i>   | <a href="#">Tadh\Atp6v0b</a>                 |  |  |     | 70  | 229 | 49 | 879 | 84  | 412  | 78            | 112  | 70  | 87   | 52             | 109  | 79             | 111                              | 46  | 74   | 66                               | ND                                                                   | ND       |                                | acgctgtcatcgTCACATGAttgtactctgct<br>gaagcgtttctaTCATGTGAccttcacattt | 5'<br>5' | >-759<br>>-404 |  |
|              |                               |                                              |  |  |     |     |     |    |     |     |      |               |      |     |      |                |      |                |                                  |     |      |                                  |                                                                      |          |                                |                                                                     |          |                |  |
|              |                               |                                              |  |  |     |     |     |    |     |     |      |               |      |     |      |                |      |                |                                  |     |      |                                  |                                                                      |          |                                |                                                                     |          |                |  |
