# Supplementary material for: Structural and Comparative Analyses of Insects Suggest the Presence of an Ultra-Conserved Regulatory Element of the Genes Encoding Vacuolar-Type ATPase Subunits and Assembly Factors
Source: MDPI journal article supplement (doi:10.3390/biology12081127), 2023-08-13
Supplement: s1 [file s1]

| Gene Cluster ID              | Tmem199                                                                               |
|------------------------------|---------------------------------------------------------------------------------------|
| Drosophila melanogaster gene | CG7071                                                                                |
| FlyBase ID                   | <a href="#">FBgn0260467</a>                                                           |
| Predicted function           | ATPase, H+ transporting, vacuolar ER assembly factor, Vma12                           |
| Comment on Gene model        | comparative data suggest that this is a dicistronic gene. Gene with dicistronic mRNA. |

|                                     |                |           |               |  |  |  |  |  |  |  |  |  |  |  |
|-------------------------------------|----------------|-----------|---------------|--|--|--|--|--|--|--|--|--|--|--|
| Tmem199 CLEAR element conservation: |                |           |               |  |  |  |  |  |  |  |  |  |  |  |
| 5' / 5'UTR / intron                 |                |           |               |  |  |  |  |  |  |  |  |  |  |  |
| Dmel\                               | CGCTACGATTTC   | TCATGTGA  | CAGCTGTGGCG   |  |  |  |  |  |  |  |  |  |  |  |
| Mdom\                               | gcaaccctagta   | TCATGTGA  | caaccattgaca  |  |  |  |  |  |  |  |  |  |  |  |
| Ccap\                               | aaatgacaattc   | TCATGTGA  | caagaaaaatgt  |  |  |  |  |  |  |  |  |  |  |  |
| Gmor\                               | ttataaattttc   | TCACGTGA  | ctttcatctttt  |  |  |  |  |  |  |  |  |  |  |  |
| Llon\                               | tggagtgttaaa   | TCACGTGA  | agaatgacagct  |  |  |  |  |  |  |  |  |  |  |  |
| Ppap\                               | ggacgtcacaca   | TCACGTGA  | gcaatgacagct  |  |  |  |  |  |  |  |  |  |  |  |
| 5' / 5'UTR                          |                |           |               |  |  |  |  |  |  |  |  |  |  |  |
| Agam\                               | CCCCGCGAGTGGT  | CACATGA   | GCCCTGATATTA  |  |  |  |  |  |  |  |  |  |  |  |
| Aara\                               | CCCCGCGAGTGGT  | CACATGA   | GCCCTGATACTA  |  |  |  |  |  |  |  |  |  |  |  |
| Aqan\                               | CCTCGCTAGTGGT  | CACATGA   | GCCCTGATACTA  |  |  |  |  |  |  |  |  |  |  |  |
| Achr\                               | CTCCGCAAGTGGT  | CACATGA   | GCCCTTGCTACTT |  |  |  |  |  |  |  |  |  |  |  |
| Aepi\                               | TTTCCGAGTGGT   | CACATGA   | GCTTTGCTAGCT  |  |  |  |  |  |  |  |  |  |  |  |
| Amin\                               | CATCTGATCTGGT  | CACATGA   | GGTGGTGCACTT  |  |  |  |  |  |  |  |  |  |  |  |
| Afun\                               | CATCTGGTTTGGT  | CACATGA   | GGTGGTTCTTGT  |  |  |  |  |  |  |  |  |  |  |  |
| Aste\                               | TGTTGGTGTCTGGT | CACATGA   | GCCAGTGATATA  |  |  |  |  |  |  |  |  |  |  |  |
| Adir\                               | TCTGCATAGAGAT  | CACATGA   | GCCGAAACGCAT  |  |  |  |  |  |  |  |  |  |  |  |
| Aalb\                               | TCGTACGGTGGT   | CACATGA   | GCAACTGAGTCG  |  |  |  |  |  |  |  |  |  |  |  |
| Adar\                               | GTGGAACGAGG    | GTCAATGA  | GCAAAATTGATC  |  |  |  |  |  |  |  |  |  |  |  |
| Aaeg\                               | AAATTTTGACAA   | TCACATGA  | TACCCAAACAA   |  |  |  |  |  |  |  |  |  |  |  |
| Cqui\                               | AAACTTGACAAT   | TCACATGA  | TTGAAAATAATG  |  |  |  |  |  |  |  |  |  |  |  |
|                                     |                |           |               |  |  |  |  |  |  |  |  |  |  |  |
| Mdes\                               | aagcgtatttgg   | TCATGTGA  | tcatatgcta    |  |  |  |  |  |  |  |  |  |  |  |
| Pxyl\                               | cggggctacggg   | TCACATGA  | taaatgtcagat  |  |  |  |  |  |  |  |  |  |  |  |
| Tcas\                               | actacacccga    | TCATATGA  | tcaaaactgaaaa |  |  |  |  |  |  |  |  |  |  |  |
| Dpon\                               | actgtcacttag   | TCAGCTGA  | ctgtcatgtggc  |  |  |  |  |  |  |  |  |  |  |  |
|                                     |                |           |               |  |  |  |  |  |  |  |  |  |  |  |
| Aech\                               | TTGTACAGCCAGT  | CACGTGAC  | AGGTATGACAT   |  |  |  |  |  |  |  |  |  |  |  |
| Acep\                               | TAGTACAGCCAAT  | CACGTGAC  | AGGTATATTGG   |  |  |  |  |  |  |  |  |  |  |  |
| Sinv\                               | TAGTACAGTCGGT  | CACGTGAC  | GCACACCGTC    |  |  |  |  |  |  |  |  |  |  |  |
| Pbar\                               | TGATAAACCAGT   | CACGTGAC  | GACGATCGCT    |  |  |  |  |  |  |  |  |  |  |  |
| Lhum\                               | TGATAAACTTAT   | TCATGTGAC | AAAGTGTGCC    |  |  |  |  |  |  |  |  |  |  |  |
| Cflo\                               | GGCACAACCTAGT  | TCATGTGAC | GACGAAAGGAGT  |  |  |  |  |  |  |  |  |  |  |  |

Tmem199 gene structure comparisons:

(Click on Species for genomic, mRNA and protein sequence informations)

Key: UTR region, CDS region

| Order                   | Species                        | Tmem199 orthologs            |        |     | muted (CG34131) |     |     |     |     |        | Tmem199(CG7071) |        |     | Extended CLEAR region |                                  | Position | bps from TSS |
|-------------------------|--------------------------------|------------------------------|--------|-----|-----------------|-----|-----|-----|-----|--------|-----------------|--------|-----|-----------------------|----------------------------------|----------|--------------|
|                         |                                |                              | 5'exon | int | exon            |     | int | ex  |     | 5'exon | intron          | exon3' |     |                       |                                  |          |              |
| Diptera (Drosophilidae) | <i>Drosophila_melanogaster</i> | <a href="#">Dmel\CG7071</a>  | 28     | 22  | 60              | 281 |     | 66  | 171 | 5      | 598             | 69     | 311 | 77                    | cgctacgatttcTCATGTGAcagctgtggcg  | 5'UTR    | 6            |
| Diptera (Muscidae)      | <i>Musca_domestica</i>         | <a href="#">Mdom\Tmem199</a> |        | 19  | 77              | 272 |     | 59  | 168 | 24     | 574             | 461    | 302 |                       | gcaaccctagtaTCATGTGAcaaccattgaca | 5'UTR?   | >-33         |
| Diptera ( Tephritidae)  | <i>Ceratitis_capitata</i>      | <a href="#">Ccap\Tmem199</a> |        | 22  | 54              | 272 |     | 54  | 171 | 14     | 574             | 58     | 281 |                       | aaatgacaattcTCATGTGAcaagaaaaatgt | 5'UTR?   | >-9          |
| Diptera (Glossinidae)   | <i>Glossina_morsitans</i>      | <a href="#">Gmor\Tmem199</a> | 7      | 22  | 70              | 272 |     | 56  | 171 | 9      | 607             | 57     | 284 | 90                    | ttataaatttcTCACGTGActttcatctttt  | intron1  | 75           |
| Diptera (Psychodidae)   | <i>Lutzomyia_longipalpis</i>   | <a href="#">Llon\Tmem199</a> |        | 25  | 74              | 83  | 65  | 357 |     | 18     | 846             |        |     |                       | tggagtgttaaaTCACGTGAagaatgacagct | 5'       | >-4          |

|                            |                                  |                                                            |   |    |     |    |     |     |          |      |       |     |      |                                                                      |                                   |               |      |
|----------------------------|----------------------------------|------------------------------------------------------------|---|----|-----|----|-----|-----|----------|------|-------|-----|------|----------------------------------------------------------------------|-----------------------------------|---------------|------|
|                            | <i>Phlebotomus_papatasi</i>      | <a href="#">Ppap\Tmem199</a>                               |   | 25 | 62  | 83 | 70  | 357 | 4        | 565  | 65    | 296 |      | ggacgtcacacaTCACGTGAgcaatgacagct                                     | 5'                                | >-4           |      |
| Diptera<br>(Culicidae)     | <i>Anopheles_gambiae</i>         | <a href="#">AGAP013136</a>                                 |   |    |     |    |     |     | 63+66+29 | 634  | 69    | 296 | 75   | ccccgcgagtggTCACATGAgccctgatatta                                     | 5'UTR?                            | 224           |      |
|                            | <i>Anopheles_arabiensis</i>      | <a href="#">Aara\Tmem199</a>                               |   |    |     |    |     |     |          | 634  | 69    | 296 |      | ccccgcgagtggTCACATGAgccctgatacta                                     | 5'UTR?                            | >-130         |      |
|                            | <i>Anopheles_quadriannulatus</i> | <a href="#">Aqan\Tmem199</a>                               |   |    |     |    |     |     |          | 634  | 77    | 296 |      | cctcgtagtggTCACATGAgccctgatacta                                      | 5'UTR?                            | >-128         |      |
|                            | <i>Anopheles_christyi</i>        | <a href="#">Achr\Tmem199</a>                               |   |    |     |    |     |     |          | 634  | 67    | 293 |      | ctccgcaagtggTCACATGAgccttgetactt                                     | 5'UTR?                            | >-121         |      |
|                            | <i>Anopheles_epiroticus</i>      | <a href="#">Aepi\Tmem199</a>                               |   |    |     |    |     |     |          | 628  | 69    | 293 |      | ttccccgagtggTCACATGAgctttgctagct                                     | 5'UTR?                            | >-128         |      |
|                            | <i>Anopheles_minimus</i>         | <a href="#">Amin\Tmem199</a>                               |   |    |     |    |     |     |          | 622  | 69    | 323 |      | catctgatctggTCACATGAggtgggacact                                      | 5'UTR?                            | >-88          |      |
|                            | <i>Anopheles_funestus</i>        | <a href="#">Afun\Tmem199</a>                               |   |    |     |    |     |     |          | 622  | 69    | 329 |      | catctggttggTCACATGAggtgttctgt                                        | 5'UTR?                            | >-91          |      |
|                            | <i>Anopheles_stephensi</i>       | <a href="#">Aste\Tmem199</a>                               |   |    |     |    |     |     |          | 631  | 87    | 338 |      | tgttggtgtcggTCACATGAgccagtgatata                                     | 5'UTR?                            | >-69          |      |
|                            | <i>Anopheles_dirus</i>           | <a href="#">Adir\Tmem199</a>                               |   |    |     |    |     |     |          | 915  |       |     |      | tctgcatagagaTCACATGAgccgaaacgat                                      | 5'UTR?                            | >-72          |      |
|                            | <i>Anopheles_nili</i>            | <a href="#">Anil\Tmem199</a>                               |   |    |     |    |     |     |          | >146 | 74    |     |      |                                                                      |                                   |               |      |
|                            | <i>Anopheles_albimanus</i>       | <a href="#">Aalb\Tmem199</a>                               |   |    |     |    |     |     |          | 607  | 76    | 320 |      | tcgtacgtgggTCACATGAgcaactgagtcg                                      | 5'UTR?                            | >-15          |      |
|                            | <i>Anopheles_darlingi</i>        | <a href="#">Adar\Tmem199</a>                               |   |    |     |    |     |     |          | 598  | 68    | 320 |      | gtggaacgagggTCACATGAgcaaatgagtc                                      | 5'UTR?                            | >-16          |      |
|                            | <i>Culex_pipiens_qui.</i>        | <a href="#">CPII009433*</a>                                |   |    |     |    |     |     |          | 595  | 63    | 335 |      | acatcaaacctcTCATATGAcgaagataggtg<br>aaactctgacaaTCACATGAttgaaaataatg | 5'UTR?                            | >-202<br>>-82 |      |
|                            | <i>Aedes_aegypti</i>             | <a href="#">AAEL011748</a>                                 |   |    |     |    |     |     | 91+56+2  | 598  | 19614 | 326 |      | aatatttgacaaTCACATGAtaccccaacaa                                      | 5'UTR                             | -8            |      |
| Diptera<br>(Cecidomyiidae) | <i>Mayetiola_destructor</i>      | <a href="#">Mdes\Tmem199</a>                               |   | 22 | 158 | 83 | 86  | 189 | 82       | 168  | 74    | 688 | 77   | 287                                                                  | aagcgtatttggTCATGTGAtcatatgtaata  | intron2       | >278 |
| Lepidoptera                | <i>Bombyx_mori</i>               | <a href="#">Bmor\Tmem199</a>                               |   | 25 | 202 | 83 | 80  | 189 | ND       | 177  | 3     | 712 | 80   | 317                                                                  | ND                                |               |      |
|                            | <i>Manduca sexta</i>             | <a href="#">Msex\Tmem199</a>                               |   | 19 | 440 | 83 | 321 | 189 | 144      | 177  | 2     | 658 | 1693 | 311                                                                  | ND                                |               |      |
|                            | <i>Danaus_plexippus</i>          | <a href="#">Dple\Tmem199</a>                               |   | 19 | 205 | 83 | 138 | 189 | 307      | 177  | 2     | 652 | 68   | 308                                                                  | tcttgtaacttgTCAGGTGAttttcttttaa   | intron1       | >92  |
|                            | <i>Heliconius_melpomene</i>      | <a href="#">Hmel\Tmem199</a>                               |   | 19 | 213 | 83 | 209 | 189 | 392      | 177  | 3     | 661 | 531  | 290                                                                  | ND                                |               |      |
|                            | <i>Plutella_xylostella</i>       | <a href="#">Pxyl\Tmem199</a>                               |   | 19 | 292 | 83 | 116 | 189 | 392      | 174  | 6     | 685 | 279  | 338                                                                  | cggggcctacgggTCACATGAtaaatgtcagat | 5'            | >-56 |
| Strepsiptera               | <i>Mengenilla_moldrzyki</i>      | <a href="#">Mmol\Tmem199</a>                               |   |    |     |    |     |     |          |      | 801   |     |      |                                                                      | ND                                |               |      |
| Coleoptera                 | <i>Dendroctonus_ponderosae</i>   | <a href="#">Dpon\Tmem199</a>                               |   |    |     |    |     |     |          | 112  | 813   |     |      | 151                                                                  | actgtcacttagTCAGCTGActgtcatgtgcc  | 5'            | -7   |
|                            | <i>Tribolium_castaneum</i>       | <a href="#">Tcas\Tmem199</a><br><a href="#">LOC656791*</a> |   | 19 | 55  | 83 | 56  | 189 | ND       | ND   | ND    | 550 | 47   | 254                                                                  | actacacccgaTCATATGAtcaaaactgaaaa  | 5'UTR?        | >-11 |
| Hymenoptera                | <i>Apis_florea</i>               | <a href="#">Aflo\Tmem199</a>                               |   | 19 | 95  | 83 | 190 | 189 | 92       | 168  | 179   | 418 | ND   | 254                                                                  | ND                                |               |      |
|                            | <i>Apis_mellifera</i>            | <a href="#">Amei\Tmem199</a>                               | 7 | 19 | 103 | 83 | 199 | 189 | 90       | 168  | 183   | 418 | 116  | 254                                                                  | 196                               | ND            |      |
|                            | <i>Bombus_impatiens</i>          | <a href="#">Bimp\Tmem199</a>                               |   | 19 | 103 | 83 | 169 | 189 | 87       | 168  | 151   | 418 | 65   | 254                                                                  |                                   | ND            |      |
|                            | <i>Bombus_terrestris</i>         | <a href="#">Bter\Tmem199</a>                               |   | 19 | 103 | 83 | 169 | 189 | 87       | 168  | 150   | 418 | 65   | 254                                                                  |                                   | ND            |      |
|                            | <i>Megachile_rotundata</i>       | <a href="#">Mrot\Tmem199</a>                               |   | 19 | 238 | 83 | 238 | 189 | 77       | 168  | 123   | 418 | 64   | 251                                                                  | atatltgtagttTCATGTAAgaaaaataata   | intron2       | >242 |
|                            | <i>Acromyrmex_echinatior</i>     | <a href="#">Aech\Tmem199</a>                               |   | 19 | 128 | 83 | 684 | 189 | 77       | 168  | 106   | 430 | 93   | 245                                                                  | ttgtacagccagTCACGTGAcaggtatgacat  | 5'            | >-60 |
|                            | <i>Atta_cephalotes</i>           | <a href="#">Acep\Tmem199</a>                               |   | 19 | 128 | 83 | 680 | 189 | 76       | 168  | 109   | 430 | 93   | 245                                                                  | tagtacagccaaTCACGTGAcaggtatatagg  | 5'            | >-66 |
|                            | <i>Solenopsis_invicta</i>        | <a href="#">Sinv\Tmem199</a>                               |   | 19 | 119 | 83 | 453 | 189 | 84       | 168  | 137   | 427 | 283  | 245                                                                  | tagtacagtcggTCACGTGAcggcacacgcgc  | 5'            | >-67 |
|                            | <i>Pogonomyrmex_barbatus</i>     | <a href="#">Pbar\Tmem199</a>                               |   | 19 | 115 | 83 | 430 | 189 | 82       | 168  | 118   | 427 | 102  | 242                                                                  | tgataaaacagTCACGTGAcgacgcatgcct   | 5'            | >-50 |
|                            | <i>Harpegnathos_saltator</i>     | <a href="#">Hsal\Tmem199</a>                               |   | ND | ND  | 83 | 113 | 189 | 249      | 168  | 101   | 424 | 90   | 251                                                                  | ND                                |               |      |
|                            | <i>Linepithema_humile</i>        | <a href="#">Lhum\Tmem199</a>                               |   | 19 | 114 | 83 | 380 | 189 | 87       | 168  | 129   | 427 | 91   | 245                                                                  | tgatataacttaTCATGTGAcaaagttgtgcc  | 5'            | >-46 |

[illegible]
