# Supplementary material for: Structural and Comparative Analyses of Insects Suggest the Presence of an Ultra-Conserved Regulatory Element of the Genes Encoding Vacuolar-Type ATPase Subunits and Assembly Factors
Source: MDPI journal article supplement (doi:10.3390/biology12081127), 2023-08-13
Supplement: s1 [file s1]

| Gene Cluster ID                        | Atp6v1H                                         |                                  |
|----------------------------------------|-------------------------------------------------|----------------------------------|
| Drosophila melanogaster gene           | VhaSFD (CG17332)                                |                                  |
| FlyBase ID                             | FBgn0027779                                     |                                  |
| Predicted function                     | V-type ATPase, H+ transporting, V1 subunit H    |                                  |
| Atp6v1H CLEAR element(s) conservation: |                                                 |                                  |
|                                        | <div>5' / 5' UTR</div>                          | <div>intron1</div>               |
| Dmel\                                  | GCTGCAGAAAAGTCACAAGACCA---GTCAGCTGAATTCGGTGTCTG |                                  |
| Gmor\                                  | GAAGCGAAAAGTCACAAGACTC---GTCAGCTGAATCTTCCATTA   |                                  |
| Mdom\                                  | TTACATCACAAGTCACAAGACCTTCTGTCAGCTGAATTCAGAGTAAA |                                  |
| Ccap\                                  | TTTCTGGGTCTTTGTGAC-TTTTGTCACTGAATTTGTTTCATCG    | GGTAAGTGTGTGTACATGACACATTTTGTGCG |
| Llon\                                  | CAATCGTATTGTTCAGCTGAAGTCAGAAACT                 |                                  |
| Ppap\                                  | CCCTCCATTCTGTCACTGAATTCGAAGGAGC                 |                                  |
| Agam\                                  | GTTCACTTCAGGTCATATGATCACAATATTT                 | GAGCAAATTCATCACGTGATGTTGTTTCTTT  |
| Aara\                                  | GTTCACTTCAGGTCATATGATCACAATATTT                 | AGCTAAATTCATCACGTGATGTTGTTTCTTT  |
| Aqan\                                  | GTTCACTTCAGGTCATATGATCACAATATTT                 | AGCTAAATTCATCACGTGATGTTGTTTCTTT  |
| Achr\                                  | ATTCACCTTTGGTCATATGATCACAATATTT                 | AGTTGAATTTAATCACGTGATGTTGTTTCTTT |
| Aepi\                                  | ATTCACCTTTGGTCATATGATCACAATATTT                 | AGTTAAATATCATCACGTGATGTTGTTTCTTT |
| Amin\                                  | ATGCACCTTTGGTCATATGATCACAATATTT                 | ATTTAATTTCCATCACGTGATGGTATTCTTT  |
| Afun\                                  | CTACACCTTTAGGTCATATGATCACAATATTT                | ATTTAATTTTCATCACGTGATGATGTTTCTTT |
| Aste\                                  | CACCCCTTTAGGTCATATGATCACAATATTT                 | CTTTACTTTTCATCACGTGATGGTATTTCGTT |
| Adir\                                  | AAGAAGAAGAGGTCATATGATCACAATTTT                  | CCATCACTTCTATCACGTGATGAGTTTCGTT  |
| Anil\                                  | AAGAAGAAGAGGTCATATGATCACAATATTT                 | AATCTACTTCCATCACGTGACTTACTTTT    |
| Aalb\                                  | TTATCAGCGCAGTCATATGATTTGATTTTCA                 | CTTCTTCGTTCTCACGTGACGTTCTACGCTT  |
| Adar\                                  | TATTCAGCGCAGTCATATGATGCCGAGAGT                  | GTTCCTCGCTCATCACGTGACGTTCTACGTT  |
| Cqui\                                  | CTTTACCCCAAGTCATATGACATTCAGCTGAG                | GAAATTTTGGAAATCACGTGACCTTTTCTCTC |
| Aaeg\                                  | ACCCCATGCAAGTCATATGACATTCAGCTGCG                | AGAAATTTGGAATCACGTGATGCTTTTGTGTC |
| Mdes\                                  | CCGATGGAAAAGTCACAAGAC-TCTCAGCTGAGGTTTTTCTTC     |                                  |
| Bmor\                                  | CATTTCTTACAGTCACAAGACCTCTCAGCTGAGCAGTGTGCGAT    |                                  |
| Msex\                                  | CACCTTTTCATAGTCACAAGACCACTCAGCTGAGGCTGTGTTCTGA  |                                  |
| Dple\                                  | CACGTCGAGTAGTCACAAGACCTCTCAGCTGAGTTCACGTCTGC    |                                  |
| Hmel\                                  | CACATCGAATAGTCACAAGACCTCTCAGCTGAGGTATCTGTCTA    |                                  |
| Pxyl\                                  | CACCTTCAATAGTCACAAGACCTCTCAGCTGAGGTTGTGTTGGT    |                                  |
| Tcas\                                  | GCGTGTCAATAATCACAAGACTTGTGAGGTGT                | GGCTGAGCACACTCACGTGACACTTGAGTATC |
| Dpon\                                  | tcaaaagattggTCATATGAtcaatctgccag                | taatgaaactatTCACGTGAcattggtcaagt |
| Dpon                                   | aatctgccagtgTCAGCTGAttgagactacgt                |                                  |
| Aflo\                                  | GTTATACATCGATCTTGTGATCCAACATATGA                |                                  |
| Amel\                                  | GTTATACATCGATCTTGTGATCCAACATATGA                |                                  |
| Bimp\                                  | GTAATATATCAGTCTTGTGATCCAAGTGTGA                 |                                  |
| Bter\                                  | GTAATATATCAGTCTTGTGATCCAAGTGTGA                 |                                  |
| Mrot\                                  | TATGTACATTGGTCTTGTGATTTTAAACAGCTG               |                                  |
| Aech\                                  | ATATTCGTGTGGTCTTGTGATCGAACAGCTGA                |                                  |
| Acep\                                  | GTATTCGCGTGATCTTGTGATCGAAGAAGCTG                |                                  |
| Sinv\                                  | GTATTCGCATGGTCTTGTGATCGAACAGCTGA                |                                  |
| Pbar\                                  | GTATTTGCGTGGTCTTGTGATCGAACAGCTGA                |                                  |
| Cflo\                                  | GTATCTGCACGGTCTTGTGATCGAACAGCTGA                |                                  |
| Lhum\                                  | GTAGTTGATTGGTCTTGTGATCGAACAGCTGA                |                                  |
| Hsal\                                  | GTACCCCAAGTGGTCTTGTGATCGAACAGCTGA               |                                  |
| Ngir\                                  | ACGCTACTCCAACTCTGTGACCTGACTTGTGA                |                                  |
| Nlon\                                  | ACGCTACTCCAACTCTGTGACCTGACTTGTGA                |                                  |
| Nvit\                                  | ACGCTACACCAA TCTCTGTGACCTGACTTGTGA              |                                  |
| Phum\                                  | CCCCATAGTTAATCACGTGAAAAATCGTAGGA                |                                  |
| Lful\                                  | gatcatggaatgTCACGAGAcaggcgagacgg                |                                  |
| Dpul\                                  | TTGGAGGGCCAGTCACATGACACAACCTGACAA               |                                  |
| Isca\                                  | GTGTCCTCTCACTCACGTGACGTCTGCTGCTG                |                                  |
| Atp6v1H gene structure comparison:     |                                                 |                                  |

| Key: UTR region         |                                  | CDS region                               | INTRON |     |      |              |     |     |      |      |       |      |                   |      |     |     |     |      |        |                       |                                                                 |                                                                      |                                                                                                       |                    |                        |
|-------------------------|----------------------------------|------------------------------------------|--------|-----|------|--------------|-----|-----|------|------|-------|------|-------------------|------|-----|-----|-----|------|--------|-----------------------|-----------------------------------------------------------------|----------------------------------------------------------------------|-------------------------------------------------------------------------------------------------------|--------------------|------------------------|
| Order                   | Species                          | Atp6v1H orthologs                        | 5'ex   | int | exon |              |     |     | int  | ex   | int   | exon |                   |      |     | int | ex  | int  | exon3' | Extended CLEAR region | Position                                                        | bps from TSS                                                         |                                                                                                       |                    |                        |
| Diptera (Drosophilidae) | <i>Drosophila_melanogaster</i>   | <a href="#">Dmel\VhaSFD-RA (CG17332)</a> | 159    | 37  | 141  | 479          |     |     |      | 2016 | 135   | 64   | 563 (126+437)     |      |     |     | 60  | 114  | 160    | 79 681                | gaaaagTCACAAGAccagTCAGCTGAatttcg                                | 5'UTR                                                                | 36                                                                                                    |                    |                        |
| Diptera (Muscidae)      | <i>Musca_domestica</i>           | <a href="#">Mdom\Atp6v1H</a>             |        | 46  | 136  | 479          |     |     |      | 1191 | 135   | 58   | 126               | 64   | 437 |     |     |      | 66     | 114                   | 69                                                              | 79                                                                   | ttacatcacagTCACAAGAccttcgTCAGCTGAattcagagtaaa                                                         | 5'UTR?             | >-100                  |
| Diptera (Tephritidae)   | <i>Ceratitis_capitata</i>        | <a href="#">Ccap\Atp6v1H</a>             |        | 46  | 106  | 479          |     |     |      | 3452 | 135   | 86   | 126               | 72   | 437 |     |     |      | 56     | 114                   | 249                                                             | 85                                                                   | ttgtgactttgTCAGCTGAattgttcacg<br>ggtaagtgtgtgTCACATGAacattttgtgcg                                     | 5'UTR? intron      | >-117<br>>58           |
| Diptera (Glossinidae)   | <i>Glossina_morsitans</i>        | <a href="#">Gmor\Atp6v1H</a>             | 149    | 46  | 85   | 479          |     |     |      | 2729 | 135   | 84   | 126               | 62   | 437 |     |     |      | 57     | 114                   | 171                                                             | 79 115                                                               | aaaagTCACAAGActcgTCAGCTGAattctccaata                                                                  | 5'UTR              | 9                      |
| Diptera (Psychodidae)   | <i>Lutzomyia_longipalpis</i>     | <a href="#">Llon\Atp6v1H</a>             | 130    | 52  | 104  | 82           | 75  | 400 |      |      |       | 2509 | 698 (135+126+437) |      |     |     | 72  | 205  |        |                       | caatcgtattgtTCACGTGAatcgagaaaa                                  | 5'UTR                                                                | 33                                                                                                    |                    |                        |
|                         | <i>Phlebotomus_papatasi</i>      | <a href="#">Ppap\Atp6v1H</a>             |        | 52  | 127  | 82           | 64  | 400 |      |      |       | ND   | 698 (135+126+437) |      |     |     | 364 | 202  |        |                       | ccctccattctgTCACGTGAattcgaaggagc                                | 5'UTR?                                                               | >-86                                                                                                  |                    |                        |
|                         |                                  |                                          |        |     |      |              |     |     |      |      |       |      |                   |      |     |     |     |      |        |                       |                                                                 |                                                                      |                                                                                                       |                    |                        |
| Diptera (Culicidae)     | <i>Anopheles_gambiae</i>         | <a href="#">Agam\Atp6v1H AGAP009486*</a> |        | 49  | 299  | 82           | 106 | 406 |      |      |       | 1237 | 135               | 78   | 563 |     |     |      | 69     | 114                   | 89                                                              | 79 99                                                                | gttcacttcaggTCATATGAtcacaaatatt<br>gagcaaatccaTCACGTGAgtgtgtttcttt                                    | 5'UTR? intron1     | 6 433                  |
|                         | <i>Anopheles_arabiensis</i>      | <a href="#">Aara\Atp6v1H</a>             |        | 49  | 308  | 82           | 100 | 406 |      |      |       | 1208 | 135               | 78   | 563 |     |     |      | 69     | 114                   | 85                                                              | 79                                                                   | gttcacttcaggTCATATGAtcacaaatatt<br>agctaaattccaTCACGTGAgtgtgtttcttt                                   | 5' intron1         | >-121<br>>327          |
|                         | <i>Anopheles_quadriannulatus</i> | <a href="#">Aqan\Atp6v1H</a>             |        | 49  | 315  | 82           | 100 | 406 |      |      |       | 1221 | 135               | 75   | 563 |     |     |      | 68     | 114                   | 88                                                              | 79                                                                   | gttcacttcaggTCATATGAtcacaaatatt<br>agctaaattccaTCACGTGAgtgtgtttcttt                                   | 5' intron1         | >-121<br>>334          |
|                         | <i>Anopheles_christyi</i>        | <a href="#">Achr\Atp6v1H</a>             |        | 49  | 316  | 82           | 64  | 406 |      |      |       | 1087 | 135               | 78   | 563 |     |     |      | 63     | 114                   | 76                                                              | 79                                                                   | attcactttggTCATATGAtcacaaatatt<br>agttgaatttaaTCACGTGAgtgtgttttttc<br>caagggaatcTCACGTGAacctaacggttag | 5' intron1 intron3 | >-117<br>>336<br>>1651 |
|                         | <i>Anopheles_epiroticus</i>      | <a href="#">Aepi\Atp6v1H</a>             |        | 49  | 294  | 82           | 95  | 406 |      |      |       | 1121 | 135               | 62   | 563 |     |     |      | 69     | 114                   | 64                                                              | 79                                                                   | attcactttggTCATATGAtcacaaatatt<br>agttaaatccaTCACGTGAgtgtgtttcttt                                     | 5' intron1         | >-129<br>>313          |
|                         | <i>Anopheles_minimus</i>         | <a href="#">Amin\Atp6v1H</a>             |        | 49  | 294  | 82           | 70  | 406 |      |      |       | 974  | 135               | 68   | 563 |     |     |      | 65     | 114                   | 67                                                              | 79                                                                   | atgcactttggTCATATGAtcacaaatatt<br>atttaattccaTCACGTGAgtgtattctttt                                     | 5' intron1         | >-115<br>>316          |
|                         | <i>Anopheles_funestus</i>        | <a href="#">Afun\Atp6v1H</a>             |        | 49  | 285  | 82           | 70  | 406 |      |      |       | 988  | 135               | 70   | 563 |     |     |      | 83     | 114                   | 67                                                              | 79                                                                   | ctacactttaggTCATATGAtcacaaatatt<br>atttaattccaTCACGTGAgtgatgtctttt                                    | 5' intron1         | >-115<br>>307          |
|                         | <i>Anopheles_stephensi</i>       | <a href="#">Aste\Atp6v1H</a>             |        | 49  | 302  | 82           | 76  | 406 |      |      |       | 1045 | 135               | 80   | 563 |     |     |      | ND     | 114                   | 72                                                              | 79                                                                   | caccctttaggTCATATGAtcacaaatatt<br>ctttactttccaTCACGTGAgtgtattcgtt                                     | 5' intron1         | >-117<br>>323          |
|                         | <i>Anopheles_dirus</i>           | <a href="#">Adir\Atp6v1H</a>             |        | 49  | 273  | 82           | 62  | 406 |      |      |       | 1013 | 135               | 68   | 563 |     |     |      | 67     | 114                   | 71                                                              | 79                                                                   | aagaagaaggTCATATGAtcacaaattttt<br>ccatcactictaTCACGTGAgtgatgtcgttt<br>gaagggaatcTCACGTGAaccttacggttag | 5' intron1 intron3 | >-133<br>>286<br>>1538 |
|                         | <i>Anopheles_nili</i>            | <a href="#">Anil\Atp6v1H</a>             |        | 49  | 273  | 82           | 59  | 406 |      |      |       | ND   | 135               | 70   | 563 |     |     |      | 78     | 114                   | 69                                                              | 79                                                                   | aagaagaaggTCATATGAtcacaaatatt<br>aatcacttccaTCACGTGAacttatttttt                                       | 5' intron1         | >-118<br>>289          |
|                         | <i>Anopheles_albimanus</i>       | <a href="#">Aalb\Atp6v1H</a>             |        | 49  | 270  | 82           | 72  | 394 |      |      |       | 1032 | 135               | 71   | 563 |     |     |      | 70     | 114                   | 69                                                              | 79                                                                   | ttatcagcgagTCACCTGAgttgattttcca<br>cttcttcgttcTCACGTGAacttctacgctt                                    | 5' intron1         | >-106<br>>284          |
|                         | <i>Anopheles_darlingi</i>        | <a href="#">Adar\Atp6v1H</a>             |        | 49  | 261  | 82           | 74  | 394 |      |      |       | 1026 | 135               | 87   | 563 |     |     |      | 70     | 114                   | 67                                                              | 79                                                                   | tattcagcgagTCACCTGAgttcccagagat<br>gttctcgtctcaTCACGTGAacttctacggtt                                   | 5' intron1         | >-115<br>>274          |
|                         | <i>Culex_pipiens_qui.</i>        | <a href="#">Cqui\Atp6v1H CPJ002428</a>   |        | 46  | 232  | 82           | 64  | 406 |      |      |       | 936  | 135               | 2950 | 563 |     |     |      | 56     | 114                   | 59                                                              | 79                                                                   | ctttaccccaagTCATATGAacatTCAGCTGA<br>gaaatttggaaTCACGTGAaccttttcttc                                    | 5'UTR? intron1     | >-135<br>>245          |
|                         | <i>Aedes_aegypti</i>             | <a href="#">Aaeg\Atp6v1H AAEL006516</a>  | 169    | 49  | 246  | 488 (82+406) |     |     |      | 4353 | 135   | 59   | 563 (374+189)     |      |     |     | 404 | 114  | 76     | 79                    | acctcatcagTCATATGAacttacetgag<br>agaaatttggaaTCACGTGAgtttttgtgc | 5'UTR intron1                                                        | 5 435                                                                                                 |                    |                        |
| Diptera (Cecidomyiidae) | <i>Mayetiola_destructor</i>      | <a href="#">Mdes\Atp6v1H</a>             |        | 52  | 414  | 482 (82+400) |     |     |      | 1809 | 135   | 86   | 374 (186+188)     |      |     | 68  | 189 | 68   | 114    | 76                    | 94                                                              | gaaaagTCACAAGActcTCAGCTGAgttttttcttc<br>gcgataaagtTCATTGAacttggttgta | 5' 5'                                                                                                 | >-153<br>>-61      |                        |
|                         |                                  |                                          |        |     |      |              |     |     |      |      |       |      |                   |      |     |     |     |      |        |                       |                                                                 |                                                                      |                                                                                                       |                    |                        |
| Lepidoptera             | <i>Bombyx_mori</i>               | <a href="#">Bmor\Atp6v1H LOC733031</a>   | 116    | 64  | 76   | 82           | 69  | 181 | 636  | 213  | 2275  | 135  | 321               | 186  | 480 | 188 | 440 | 189  | 256    | 114                   | 352                                                             | 76 143                                                               | catttctcatagTCACAAGAcctcTCACCTGAgcagtgctggat                                                          | 5'UTR              | 16                     |
|                         | <i>Manduca sexta</i>             | <a href="#">Msex\Atp6v1H</a>             |        | 64  | 74   | 82           | 81  | 181 | 1136 | 213  | 2509  | 135  | 495               | 186  | 115 | 188 | 501 | 189  | 691    | 114                   | 557                                                             | 76                                                                   | cactttcatagTCACAAGAccaTCAGCTGAgtcgtgtgtcga                                                            | 5'                 | >-95                   |
|                         | <i>Danaus_plexippus</i>          | <a href="#">Dple\Atp6v1H</a>             |        | 52  | 94   | 82           | 67  | 181 | 358  | 210  | 2006? | 135  | 303               | 186  | 108 | 188 | 256 | 189  | 486    | 114                   | 361                                                             | 79                                                                   | cacgtcgagtagTCACAAGAcctcTCAGCTGAgttcactgtcgc                                                          | 5'                 | >-98                   |
|                         | <i>Heliconius_melpomene</i>      | <a href="#">Hmel\Atp6v1H</a>             |        | 64  | 89   | 82           | 81  | 181 | 119  | 210  | 2506  | 135  | 675               | 186  | 524 | 188 | 595 | 189  | 252    | 114                   | 241                                                             | 79                                                                   | cacatcgaaagTCACAAGAcctcTCAGCTGAgttatctgtcta                                                           | 5'                 | >-95                   |
|                         | <i>Plutella_xylostella</i>       | <a href="#">Pxyi\Atp6v1H</a>             |        | 64  | 93   | 82           | 255 | 181 | 728  | 204  | 2035  | 135  | 437               | 186  | 596 | 188 | 716 | 189  | 1043   | 114                   | 474                                                             | 76                                                                   | cactttcaatagTCACAAGAcctcTCAGCTGAgttgtgtgtgt                                                           | 5'                 | >-93                   |
|                         |                                  |                                          |        |     |      |              |     |     |      |      |       |      |                   |      |     |     |     |      |        |                       |                                                                 |                                                                      |                                                                                                       |                    |                        |
| Strepsiptera            | <i>Mengenilla_moldrzyki</i>      | <a href="#">Mmol\Atp6v1H</a>             |        | ND  | ND   | 82           | 58  | 190 | 237  | 219  | ND    | 360  |                   |      | ND  | 335 | 59  | 184? |        |                       |                                                                 | ND                                                                   |                                                                                                       |                    |                        |

|              |                                |                                                                  |     |     |      |    |     |     |      |               |       |                       |           |     |      |               |                      |     |     |               |      |     |     |                                                                   |                                                                                                       |                                 |                                |                                                             |       |                                |    |     |
|--------------|--------------------------------|------------------------------------------------------------------|-----|-----|------|----|-----|-----|------|---------------|-------|-----------------------|-----------|-----|------|---------------|----------------------|-----|-----|---------------|------|-----|-----|-------------------------------------------------------------------|-------------------------------------------------------------------------------------------------------|---------------------------------|--------------------------------|-------------------------------------------------------------|-------|--------------------------------|----|-----|
| Coleoptera   | <i>Tribolium_castaneum</i>     | <a href="#">Tcas\Atp6v1H</a><br><a href="#">LOC657235*</a>       | 83  | 79  | 232  | 82 | 49  | 190 | 4486 | 219           | 4351  | 695 (135+186+188+186) |           |     |      |               |                      | 48  | 199 |               |      |     |     | gcgtgtcaataaTCACAAGAcctgtcagggtg<br>ggctgagcacTCACGTGAacctgtgagtc | 5'UTR?<br>intron1                                                                                     | 1<br>291                        |                                |                                                             |       |                                |    |     |
|              | <i>Dendroctonus_ponderosae</i> | <a href="#">Dpon\Atp6v1H</a>                                     | 101 | 73  | 2654 | 82 | 59  | 190 | 4486 | 219           | 4351  | 135                   | 55        | 225 | 60   | 135           | ND                   |     | 200 | 150           | 198  | 63  | 55  | 40+125                                                            | tcaaaagattggTCATATGAtcaatgtccag<br>aatgtccaggtTCAGCTGAttgagactagt<br>taatgaactatTCACGTGAacctgttcaagt  | 5'UTR?<br>5'UTR<br>intron1      | -21<br>2<br>365                |                                                             |       |                                |    |     |
|              |                                |                                                                  |     |     |      |    |     |     |      |               |       |                       |           |     |      |               |                      |     |     |               |      |     |     |                                                                   |                                                                                                       |                                 |                                |                                                             |       |                                |    |     |
| Hymenoptera  | <i>Apis_florea</i>             | <a href="#">Aflo\Atp6v1H</a>                                     |     | 58  | 440  | 82 | 94  | 190 | 616  | 219           | 1125  | 206                   | 78        | 85  | 107  | 407           |                      |     |     | 63            | 114  | 111 | 94  |                                                                   | gttatcatcgaTCTTGTGAtccaactatga                                                                        | 5'UTR?                          | >-99                           |                                                             |       |                                |    |     |
|              | <i>Apis_mellifera</i>          | <a href="#">Ame\Atp6v1H</a><br><a href="#">GB17480</a>           | 119 | 58  | 452  | 82 | 102 | 190 | 583  | 219           | 1023  | 206                   | 87        | 85  | 99   | 407           |                      |     |     | 63            | 114  | 122 | 94  | 439                                                               | gttatcatcgaTCTTGTGAtccaactatga                                                                        | 5'UTR                           | 14                             |                                                             |       |                                |    |     |
|              | <i>Bombus_impatiens</i>        | <a href="#">Bimp\Atp6v1H</a>                                     |     | 58  | 491  | 82 | 838 | 190 | 378  | 219           | 1203  | 206                   | 85        | 85  | 875  | 407           |                      |     |     | 73            | 114  | 102 | 91  |                                                                   | gtaatatcacgTCTTGTGAtccaagtgtga                                                                        | 5'UTR?                          | >-102                          |                                                             |       |                                |    |     |
|              | <i>Bombus_terrestris</i>       | <a href="#">Bter\Atp6v1H</a><br><a href="#">LOC100648051</a>     |     | 58  | 506  | 82 | 936 | 190 | 372  | 219           | 1204  | 206                   | 85        | 85  | 856  | 407           |                      |     |     | 73            | 114  | 102 | 91  |                                                                   | gtaatatcacgTCTTGTGAtccaagtgtga                                                                        | 5'UTR?                          | >-102                          |                                                             |       |                                |    |     |
|              | <i>Megachile_rotundata</i>     | <a href="#">Mrot\Atp6v1H</a>                                     |     | 58  | 603  | 82 | 78  | 190 | 78   | 219           | 991   | 206                   | 78        | 85  | 67   | 407           |                      |     |     | 80            | 114  | 78  | 94  |                                                                   | tatgtacattggTCTTGTGAtttaacagctg                                                                       | 5'UTR?                          | >-104                          |                                                             |       |                                |    |     |
|              | <i>Acromyrmex_echinator</i>    | <a href="#">Aech\Atp6v1H</a><br><a href="#">AECH24129*</a>       |     | 61  | 200  | 82 | 196 | 190 | 455  | 219           | ND    | 206                   | 95        | 85  | 87   | 407           |                      |     |     | 79            | 114  | 164 | 94  |                                                                   | afattcgtgtggTCTTGTGAtcgaacagctga                                                                      | 5'                              | >-99                           |                                                             |       |                                |    |     |
|              | <i>Atta_cephalotes</i>         | <a href="#">Acep\Atp6v1H</a><br><a href="#">ACEP26838*</a>       |     | 61  | 196  | 82 | 176 | 190 | 487  | 219           | 19366 | 206                   | 97        | 85  | 77   | 407           |                      |     |     | 75            | 114  | 163 | 94  |                                                                   | gtattcgcgtgaTCTTGTGAtcgaagaagctg                                                                      | 5'                              | >-102                          |                                                             |       |                                |    |     |
|              | <i>Solenopsis_invicta</i>      | <a href="#">Sinv\Atp6v1H</a><br><a href="#">SINV11121*</a>       |     | 58  | 195  | 82 | 168 | 190 | 775  | 219           | ND    | 206                   | 84        | 85  | 82   | 407           |                      |     |     | 77            | 114  | 171 | 94  |                                                                   | gtattcgcagtgTCTTGTGAtcgaacagctga                                                                      | 5'                              | >-102                          |                                                             |       |                                |    |     |
|              | <i>Pogonomyrmex_barbatus</i>   | <a href="#">Pbar\Atp6v1H</a><br><a href="#">PB18819*</a>         |     | 58  | 191  | 82 | 73  | 190 | 112  | 219           | ND    | 206                   | 91        | 85  | 92   | 407           |                      |     |     | 119           | 114  | 188 | 88  |                                                                   | gtatttgcgtggTCTTGTGAtcgaacagctga                                                                      | 5'                              |                                |                                                             |       |                                |    |     |
|              | <i>Harpegnathos_saltator</i>   | <a href="#">Hsal\Atp6v1H</a><br><a href="#">HSAL13159*</a>       |     | 58  | 189  | 82 | 225 | 190 | 164  | 219           | 1499  | 206                   | 69        | 85  | 82   | 407           |                      |     |     | 82            | 114  | 137 | 94  |                                                                   | gtaccaagtgTCTTGTGAtcgaacagctga                                                                        | 5'                              | >-102                          |                                                             |       |                                |    |     |
|              | <i>Linepithema_humile</i>      | <a href="#">Lhum\Atp6v1H</a><br><a href="#">LH13415*</a>         |     | 58  | 191  | 82 | 122 | 190 | 118  | 219           | 1639  | 206                   | 97        | 85  | 77   | 407           |                      |     |     | 107           | 114  | 86  | 94  |                                                                   | gtagtgattggTCTTGTGAtcgaacagctga                                                                       | 5'                              | >-101                          |                                                             |       |                                |    |     |
|              | <i>Camponotus_floridanus</i>   | <a href="#">Cflo\Atp6v1H</a><br><a href="#">CFL015154*</a>       |     | 58  | 190  | 82 | 159 | 190 | 121  | 219           | 1525  | 206                   | 104       | 85  | 96   | 407           |                      |     |     | 117           | 114  | 208 | 94  |                                                                   | gtatctgcacggTCTTGTGAtcgaacagctga                                                                      | 5'                              |                                |                                                             |       |                                |    |     |
|              | <i>Nasonia_giraulti</i>        | <a href="#">Ngir\Atp6v1H</a>                                     |     | 58  | 144  | 82 | 76  | 190 | 68   | 219           | 1032  | 291                   |           |     | 72   | 407           |                      |     |     | 72            | 114  | 81  | 94  |                                                                   | tctgtgggagtaTCAGCTGAtcaatcacgct<br>aacatgcgcgTCATCTGAcgtactgacac<br>acgtactccaaTCTCTGTGAcctgactgtga   | 5'UTR?                          | >-222<br>>-190<br>>-136        |                                                             |       |                                |    |     |
|              | <i>Nasonia_longicornis</i>     | <a href="#">Nlon\Atp6v1H</a>                                     |     | 58  | 144  | 82 | 82  | 190 | 68   | 219           | 1020  | 291                   |           |     | 79   | 407           |                      |     |     | 72            | 114  | 81  | 94  |                                                                   | tctgtgggagtaTCAGCTGAtcaatcacgct<br>aacgtcgcgcgTCATCTGAcgtactgacac<br>acgtactccaaTCTCTGTGAcctgactgtga  | 5'UTR?                          | >-222<br>>-190<br>>-136        |                                                             |       |                                |    |     |
|              | <i>Nasonia_vitripennis</i>     | <a href="#">Nvit\Atp6v1H</a><br><a href="#">NV13458</a>          | 37  | 58  | 144  | 82 | 82  | 190 | 68   | 219           | 1053  | 291 (206+85)          |           |     | 79   | 407 (179+228) |                      |     |     | 72            | 114  | 81  | 94  |                                                                   | tctgtgggagtaTCAGCTGAtcaatcacgct<br>aacgtcgcgcgTCATCTGAcgtactgacac<br>acgtactaccaaTCTCTGTGAcctgactgtga | 5'UTR?                          | >-186<br>>-154<br>>-99         |                                                             |       |                                |    |     |
|              |                                |                                                                  |     |     |      |    |     |     |      |               |       |                       |           |     |      |               |                      |     |     |               |      |     |     |                                                                   |                                                                                                       |                                 |                                |                                                             |       |                                |    |     |
| Hemiptera    | <i>Acyrtosiphon_pisum</i>      | <a href="#">Apis\Atp6v1H</a><br><a href="#">LOC100161058*</a>    | 122 | 58  | 98   | 82 | 71  | 184 | 104  | 219           | 414   | 206                   | 68        | 85  | 58   | 179           | 74                   | 228 | 85  | 114           | 2505 | 79  | 330 |                                                                   | ND                                                                                                    |                                 |                                |                                                             |       |                                |    |     |
|              | <i>Rhodnius_prolixus</i>       | <a href="#">Rpro\Atp6v1H</a>                                     |     | 58  | 76   | 82 | 69  | 190 | 169  | 219           | 73    | 206                   | 71        | 85  | 66   | 179           | 87                   | 228 | 157 | 114           | 1010 | 88  |     |                                                                   | ND                                                                                                    |                                 |                                |                                                             |       |                                |    |     |
|              |                                |                                                                  |     |     |      |    |     |     |      |               |       |                       |           |     |      |               |                      |     |     |               |      |     |     |                                                                   |                                                                                                       |                                 |                                |                                                             |       |                                |    |     |
| Phthiraptera | <i>Pediculus_humanus</i>       | <a href="#">Phum\Atp6v1H</a><br><a href="#">PHUM375970</a>       |     | 61  | 333  | 82 | 203 | 190 | 89   | 219           | 148   | 206 (98+108)          |           |     | 472  | 264 (85+179)  |                      |     | 132 | 228           | 107  | 114 | 556 | 82                                                                |                                                                                                       | ccccatagttaaTCACGTGAaaatcgtagga | 5'                             | >-789                                                       |       |                                |    |     |
| Odonata      | <i>Ladona_fulva</i>            | <a href="#">Lful\Atp6v1H</a>                                     |     | 52  | 228  | 82 | ND  | 190 | 1262 | 219 (114+105) |       | ND                    | 108+ND+98 |     |      | 655           | 85                   | ND  | ND  | 228 (126+102) |      | ND  | 114 | ND                                                                | 94                                                                                                    |                                 | gatcatggaatTCACGAGAcaggcacaggg | 5'                                                          | >-126 |                                |    |     |
| Crustacea    | <i>Daphnia_pulex</i>           | <a href="#">Dpul\Atp6v1H</a>                                     | 142 | 61  | 72   | 82 | 190 | 190 | 73   | 354           |       |                       |           | 64  | 71   | 67            | 492 (85+179+126+102) |     |     |               | 74   | 114 | 68  | 76                                                                | 75                                                                                                    | ttagaggccagTCACATGAacaaactgacaa | 5'UTR                          | 1                                                           |       |                                |    |     |
| Ixodida      | <i>Ixodes_scapularis</i>       | <a href="#">Iscs\Atp6v1H</a><br><a href="#">ISCW013948*</a>      | 24  | 64  | ND   | 82 | ND  | 190 | ND   | 114           | 444   | 105                   | 1960      | 98  | 1396 | 108           | 94                   | 85  | 939 | 179           | 1483 | 126 | 642 | 102                                                               | ND                                                                                                    | 114                             | ND                             | 73                                                          | 45    | gtgtctctcacTCACGTGAcgtgtgtgtgt | 5' | -11 |
|              |                                |                                                                  |     |     |      |    |     |     |      |               |       |                       |           |     |      |               |                      |     |     |               |      |     |     |                                                                   |                                                                                                       |                                 |                                |                                                             |       |                                |    |     |
|              | <i>Homo_sapiens</i>            | <a href="#">ATP6V1H</a>                                          | 422 | 113 |      |    |     | 103 | 90   | 114           |       |                       | 105       |     | 98   |               | 193                  |     | 179 |               | 126  |     | 102 |                                                                   | 114                                                                                                   |                                 | 61                             | atcattcaagTCATATGAaaccattgac<br>ctaaacctTCACGTGAaactcaaaagc | 5'    | -596<br>-139                   |    |     |
| Cnidaria     | <i>Nematostella_vectensis</i>  | <a href="#">Nvec\Atp6v1H</a><br><a href="#">v1g164874</a>        | 8   | 95  |      |    |     | 100 | 90   | 44            | 70    |                       | 105       |     | 98   |               | 111                  | 88  | 72  | 48            | 53   | 79  | 47  |                                                                   | 102                                                                                                   | 114                             | 34                             | tgcttcgttaTCACGTGAacagaagtcac                               | 5'    | -108                           |    |     |
| Placozoa     | <i>Trichoplax_adhaerens</i>    | <a href="#">Tadh\Atp6v1H</a><br><a href="#">TRIADDRAFT_36227</a> | ND  | 56  |      |    |     | 106 | 90   | 44            | 73    |                       | 105       |     | 98   |               | 108                  | 85  | 72  | 48            | 53   | 79  | 47  |                                                                   | 102                                                                                                   | 114                             | 64                             | ND                                                          |       |                                |    |     |
