# Supplementary material for: Structural and Comparative Analyses of Insects Suggest the Presence of an Ultra-Conserved Regulatory Element of the Genes Encoding Vacuolar-Type ATPase Subunits and Assembly Factors
Source: MDPI journal article supplement (doi:10.3390/biology12081127), 2023-08-13
Supplement: s1 [file s1]

|                                     |                                                                                                              |
|-------------------------------------|--------------------------------------------------------------------------------------------------------------|
| Gene Cluster ID                     | Atp6v0e                                                                                                      |
| <b>Drosophila melanogaster gene</b> | <b>VhaM9.7-b (CG7625)</b>                                                                                    |
| FlyBase ID                          | <a href="#">FBgn0028663</a>                                                                                  |
| <b>Predicted function</b>           | <b>ATPase, H<sup>+</sup> transporting, lysosomal 9kDa, V0 subunit e</b>                                      |
| Protein size                        | 89 amino acids                                                                                               |
| Cytogenetic map                     | 3L: <a href="#">78D5-78D5</a>                                                                                |
| Gene sequence location              | <a href="#">3L:21532946..21533798</a> [+]                                                                    |
| <b>Dmel CLEAR sequence</b>          | <b>TCATGTGA</b>                                                                                              |
| CLEAR sequence location             | 3L:21532984..21532991                                                                                        |
| Drosophila Atp6v0e paralogs         | <a href="#">VhaM9.7-a</a> (CG1268); <a href="#">VhaM9.7-c</a> (CG11589); <a href="#">VhaM9.7-d</a> (CG14909) |

FlyBaseVhaM9.7-b (CG7625) gene model & CLEAR element (red) position:

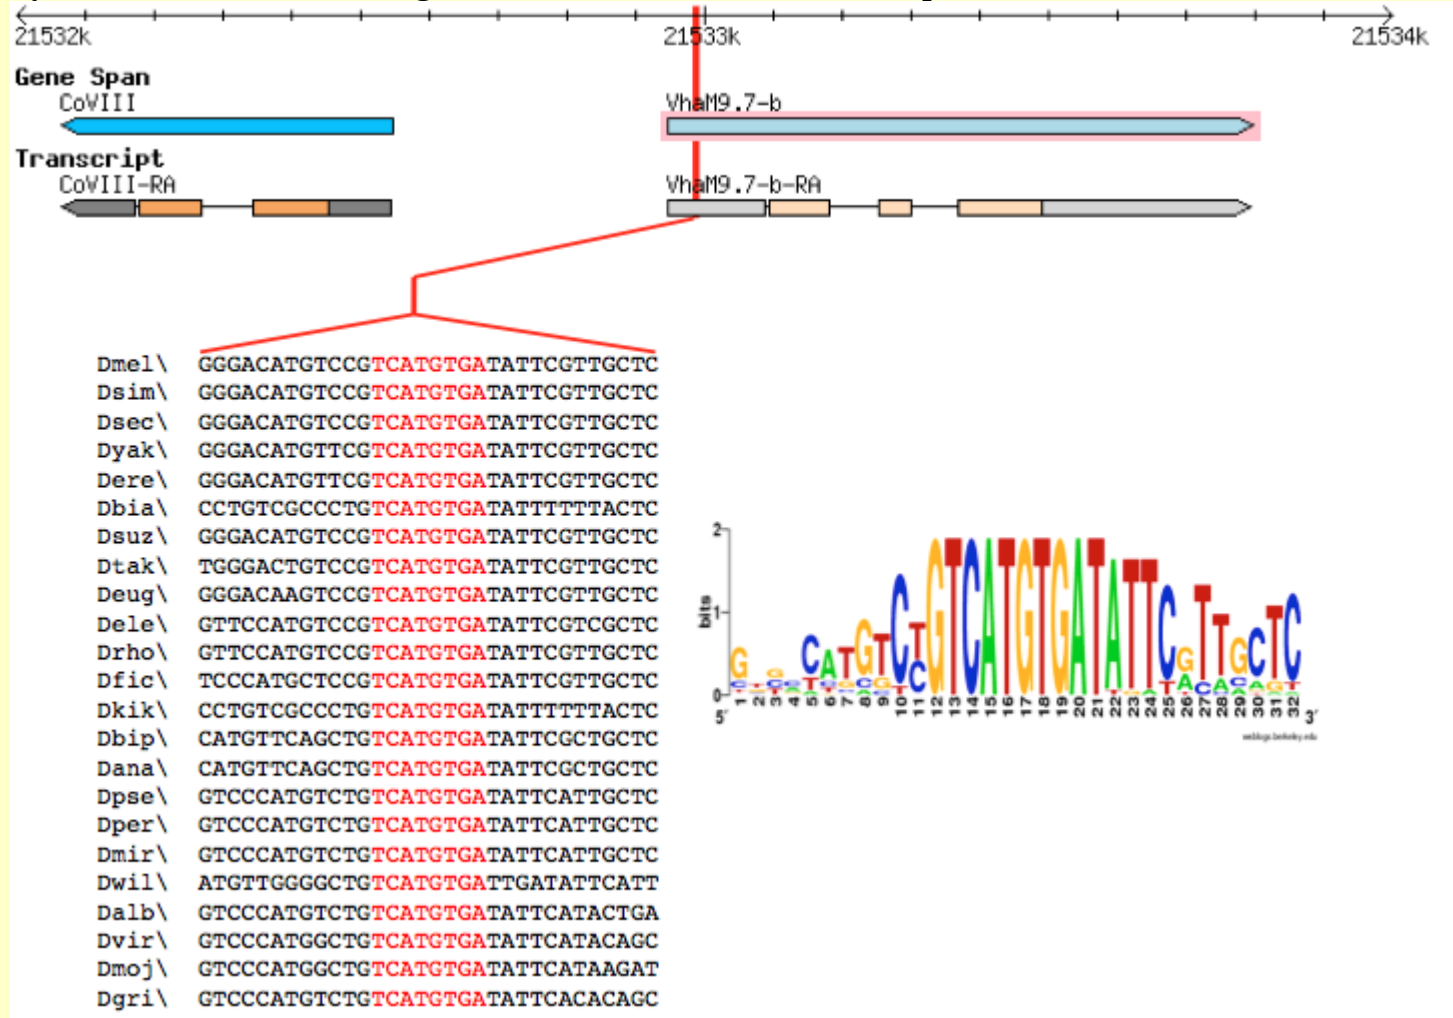

Atp6v0e gene structure comparison:

Key: UTR region, CDS region

| Species                 | Atp6v0e orthologs             | 5'exon |    | intron | exon | intron | exon3' |     | Extended CLEAR region           | Position | bps from TSS |
|-------------------------|-------------------------------|--------|----|--------|------|--------|--------|-----|---------------------------------|----------|--------------|
|                         |                               |        |    |        |      |        |        |     |                                 |          |              |
| Drosophila_melanogaster | <a href="#">DmelVhaM9.7-b</a> | 142    | 95 | 70     | 48   | 68     | 127    | 303 | gggacatgtccgTCATGTGAtattcgttctc | 5'UTR    | 38           |

|                                 |                                 |  |     |    |    |     |     |  |                                  |        |  |
|---------------------------------|---------------------------------|--|-----|----|----|-----|-----|--|----------------------------------|--------|--|
| <i>Drosophila_simulans</i>      | <a href="#">Dsim\GD14971</a>    |  | 95  | 70 | 48 | 105 | 127 |  | gggacatgtccgTCATGTGAtattcggtgctc | 5'UTR? |  |
| <i>Drosophila_sechellia</i>     | <a href="#">Dsec\GM22381</a>    |  | 95  | 70 | 48 | 105 | 127 |  | gggacatgtccgTCATGTGAtattcggtgctc | 5'UTR? |  |
| <i>Drosophila_yakuba</i>        | <a href="#">Dyak\GE19768</a>    |  | 95  | 63 | 48 | 101 | 127 |  | gggacatgttcgTCATGTGAtattcggtgctc | 5'UTR? |  |
| <i>Drosophila_erecta</i>        | <a href="#">Dere\GG16199</a>    |  | 95  | 58 | 48 | 100 | 127 |  | gggacatgttcgTCATGTGAtattcggtgctc | 5'UTR? |  |
| <i>Drosophila_biarmipes</i>     | <a href="#">Dbia\VhaM9.7-b</a>  |  | 95  | 53 | 48 | 111 | 127 |  | gggacatgtccgTCATGTGAtattcggtgctc | 5'UTR? |  |
| <i>Drosophila_suzukii</i>       | <a href="#">Dsuz\VhaM9.7-b</a>  |  | 95  | 51 | 48 | 106 | 127 |  | gggacatgtccgTCATGTGAtattcggtgctc | 5'UTR? |  |
| <i>Drosophila_takahashii</i>    | <a href="#">Dtak\VhaM9.7-b</a>  |  | 95  | 70 | 48 | 102 | 127 |  | tgggactgtccgTCATGTGAtattcggtgctc | 5'UTR? |  |
| <i>Drosophila_eugracilis</i>    | <a href="#">Deug\VhaM9.7-b</a>  |  | 95  | 52 | 48 | 59  | 127 |  | gggacaagtccgTCATGTGAtattcggtgctc | 5'UTR? |  |
| <i>Drosophila_elegans</i>       | <a href="#">Dele\VhaM9.7-b</a>  |  | 95  | 56 | 48 | 84  | 127 |  | gttccatgtccgTCATGTGAtattcggtgctc | 5'UTR? |  |
| <i>Drosophila_rhopaloea</i>     | <a href="#">Drho\VhaM9.7-b</a>  |  | 95  | 56 | 48 | 78  | 127 |  | gttccatgtccgTCATGTGAtattcggtgctc | 5'UTR? |  |
| <i>Drosophila_ficusphila</i>    | <a href="#">Dfic\VhaM9.7-b</a>  |  | 95  | 56 | 48 | 78  | 127 |  | tcccatgtccgTCATGTGAtattcggtgctc  | 5'UTR? |  |
| <i>Drosophila_kikkawai</i>      | <a href="#">Dkik\VhaM9.7-b</a>  |  | 95  | 54 | 48 | 72  | 127 |  | cctgtgcacctgTCATGTGAtatttttactc  | 5'UTR? |  |
| <i>Drosophila_bipectinata</i>   | <a href="#">Dbip\VhaM9.7-b</a>  |  | 95  | 59 | 48 | 92  | 127 |  | catgttcagctgTCATGTGAtattcggtgctc | 5'UTR? |  |
|                                 | <a href="#">Dbip\VhaM9.7-b2</a> |  | 270 |    |    |     |     |  |                                  |        |  |
| <i>Drosophila_ananassae</i>     | <a href="#">Dana\GF23725</a>    |  | 95  | 59 | 48 | 92  | 127 |  | catgttcagctgTCATGTGAtattcggtgctc | 5'UTR? |  |
| <i>Drosophila_pseudoobscura</i> | <a href="#">Dpse\GA20488</a>    |  | 98  | 54 | 48 | 105 | 127 |  | gtcccatgtctgTCATGTGAtattcattgctc | 5'UTR? |  |
| <i>Drosophila_persimilis</i>    | <a href="#">Dper\GL11891</a>    |  | 98  | 54 | 48 | 105 | 127 |  | gtcccatgtctgTCATGTGAtattcattgctc | 5'UTR? |  |
| <i>Drosophila_miranda</i>       | <a href="#">Dmir\VhaM9.7-b</a>  |  | 98  | 54 | 48 | 105 | 127 |  | gtcccatgtctgTCATGTGAtattcattgctc | 5'UTR? |  |
| <i>Drosophila_willistoni</i>    | <a href="#">Dwil\GK17834</a>    |  | 95  | 81 | 48 | 348 | 127 |  | atgttggggctgTCATGTGAttgatattcatt | 5'UTR? |  |
| <i>Drosophila_albomicans</i>    | <a href="#">Dalb\VhaM9.7-b</a>  |  | 95  | 65 | 48 | 102 | 127 |  | gtcccatgtctgTCATGTGAtattcatactga | 5'UTR? |  |
| <i>Drosophila_mojavensis</i>    | <a href="#">Dmoj\Tes122</a>     |  | 95  | 75 | 48 | 118 | 127 |  | gtcccatggctgTCATGTGAtattcataagat | 5'UTR? |  |
| <i>Drosophila_virilis</i>       | <a href="#">Dvir\GJ13542</a>    |  | 95  | 58 | 48 | 123 | 127 |  | gtcccatggctgTCATGTGAtattcatacagc | 5'UTR? |  |

|                                 |                                |    |     |    |    |     |     |  |                                 |        |  |
|---------------------------------|--------------------------------|----|-----|----|----|-----|-----|--|---------------------------------|--------|--|
| <i>Drosophila_grimshawi</i>     | <a href="#">Dgri\GH14789</a>   |    | 95  | 71 | 48 | 114 | 127 |  | gtcccatgtctgTCATGTGAtattcacacgc | 5'UTR? |  |
| Paralog:VhaM9.7-a (CG1268)      |                                |    |     |    |    |     |     |  |                                 |        |  |
| <i>Drosophila_melanogaster</i>  | <a href="#">Dmel\VhaM9.7-a</a> | 20 | 258 |    |    |     | 162 |  |                                 |        |  |
| <i>Drosophila_simulans</i>      | <a href="#">Dsim\VhaM9.7-a</a> |    | 258 |    |    |     |     |  |                                 |        |  |
| <i>Drosophila_sechellia</i>     | <a href="#">Dsec\GM14641</a>   |    | 258 |    |    |     |     |  |                                 |        |  |
| <i>Drosophila_yakuba</i>        | <a href="#">Dyak\GE21432</a>   |    | 258 |    |    |     |     |  |                                 |        |  |
| <i>Drosophila_erecta</i>        | <a href="#">Dere\GG15212</a>   |    | 258 |    |    |     |     |  |                                 |        |  |
| <i>Drosophila_biarmipes</i>     | <a href="#">Dbia\VhaM9.7-a</a> |    | 258 |    |    |     |     |  |                                 |        |  |
| <i>Drosophila_suzukii</i>       | <a href="#">Dsuz\VhaM9.7-a</a> |    | 258 |    |    |     |     |  |                                 |        |  |
| <i>Drosophila_takahashii</i>    | <a href="#">Dtak\VhaM9.7-a</a> |    | 258 |    |    |     |     |  |                                 |        |  |
| <i>Drosophila_eugracilis</i>    | <a href="#">Deug\VhaM9.7-a</a> |    | 258 |    |    |     |     |  |                                 |        |  |
| <i>Drosophila_elegans</i>       | <a href="#">Dele\VhaM9.7-a</a> |    | 258 |    |    |     |     |  |                                 |        |  |
| <i>Drosophila_rhopaloea</i>     | <a href="#">Drho\VhaM9.7-a</a> |    | 258 |    |    |     |     |  |                                 |        |  |
| <i>Drosophila_ficusphila</i>    | <a href="#">Dfic\VhaM9.7-a</a> |    | 258 |    |    |     |     |  |                                 |        |  |
| <i>Drosophila_kikkawai</i>      | <a href="#">Dkik\VhaM9.7-a</a> |    | 258 |    |    |     |     |  |                                 |        |  |
| <i>Drosophila_bipectinata</i>   | <a href="#">Dbip\VhaM9.7-a</a> |    | 258 |    |    |     |     |  |                                 |        |  |
| <i>Drosophila_ananassae</i>     | <a href="#">Dana\GF20098</a>   |    | 258 |    |    |     |     |  |                                 |        |  |
| <i>Drosophila_pseudoobscura</i> | <a href="#">Dpse\GA11753</a>   |    | 258 |    |    |     |     |  |                                 |        |  |
| <i>Drosophila_persimilis</i>    | <a href="#">Dper\GL12843</a>   |    | 258 |    |    |     |     |  |                                 |        |  |
| <i>Drosophila_miranda</i>       | <a href="#">Dmir\VhaM9.7-a</a> |    | 258 |    |    |     |     |  |                                 |        |  |
| <i>Drosophila_willistoni</i>    | <a href="#">Dwil\GK19005</a>   |    | 258 |    |    |     |     |  |                                 |        |  |
| <i>Drosophila_albomicans</i>    | <a href="#">Dalb\VhaM9.7-a</a> |    | 261 |    |    |     |     |  |                                 |        |  |

|                                 |                                     |  |     |  |  |  |
|---------------------------------|-------------------------------------|--|-----|--|--|--|
| <i>Drosophila_mojavensis</i>    | <a href="#">Dmoj\GI16589</a>        |  | 258 |  |  |  |
| <i>Drosophila_virilis</i>       | <a href="#">Dvir\GI12841</a>        |  | 258 |  |  |  |
| <i>Drosophila_grimshawi</i>     | <a href="#">Dgri\GH15937</a>        |  | 258 |  |  |  |
| Paralog: VhaM9.7-c (CG11589)    |                                     |  |     |  |  |  |
| <i>Drosophila_melanogaster</i>  | <a href="#">Dmel\VhaM9.7-<br/>c</a> |  | 255 |  |  |  |
| <i>Drosophila_simulans</i>      | <a href="#">Dsim\GD13283</a>        |  | 255 |  |  |  |
| <i>Drosophila_sechellia</i>     | <a href="#">Dsec\GM14003</a>        |  | 255 |  |  |  |
| <i>Drosophila_yakuba</i>        | <a href="#">Dyak\GE20639</a>        |  | 255 |  |  |  |
| <i>Drosophila_erecta</i>        | <a href="#">Dere\GG14211</a>        |  | 255 |  |  |  |
| <i>Drosophila_biarmipes</i>     | <a href="#">Dbia\VhaM9.7-<br/>c</a> |  | 255 |  |  |  |
| <i>Drosophila_suzukii</i>       | <a href="#">Dsuz\VhaM9.7-<br/>c</a> |  | 255 |  |  |  |
| <i>Drosophila_takahashii</i>    | <a href="#">Dtak\VhaM9.7-<br/>c</a> |  | 255 |  |  |  |
| <i>Drosophila_eugracilis</i>    | <a href="#">Deug\VhaM9.7-<br/>c</a> |  | 255 |  |  |  |
| <i>Drosophila_elegans</i>       | <a href="#">Dele\VhaM9.7-<br/>c</a> |  | 255 |  |  |  |
| <i>Drosophila_rhopaloea</i>     | <a href="#">Drho\VhaM9.7-<br/>c</a> |  | 255 |  |  |  |
| <i>Drosophila_ficusphila</i>    | <a href="#">Dfic\VhaM9.7-c</a>      |  | 255 |  |  |  |
| <i>Drosophila_kikkawai</i>      | <a href="#">Dkik\VhaM9.7-<br/>c</a> |  | 255 |  |  |  |
| <i>Drosophila_bipectinata</i>   | <a href="#">Dbjp\VhaM9.7-<br/>c</a> |  | 252 |  |  |  |
| <i>Drosophila_ananassae</i>     | <a href="#">Dana\GF20059</a>        |  | 252 |  |  |  |
| <i>Drosophila_pseudoobscura</i> | <a href="#">Dpse\GA11084</a>        |  | 255 |  |  |  |
| <i>Drosophila_persimilis</i>    | <a href="#">Dper\GL12731</a>        |  | 255 |  |  |  |
| <i>Drosophila_miranda</i>       | <a href="#">Dmir\VhaM9.7-<br/>c</a> |  | 255 |  |  |  |
| <i>Drosophila_willistoni</i>    |                                     |  |     |  |  |  |

|                                 |                                |    |     |     |  |  |
|---------------------------------|--------------------------------|----|-----|-----|--|--|
| <i>Drosophila_albomicans</i>    | <a href="#">Dalb\VhaM9.7-c</a> |    | 258 |     |  |  |
| <i>Drosophila_mojavensis</i>    | <a href="#">Dmoj\GI16823</a>   |    | 258 |     |  |  |
| <i>Drosophila_virilis</i>       | <a href="#">Dvir\GI12571</a>   |    | 258 |     |  |  |
| <i>Drosophila_grimshawi</i>     | <a href="#">Dgri\GH15548</a>   |    | 279 |     |  |  |
| Paralog: VhaM9.7-d (CG14909)    |                                |    |     |     |  |  |
| <i>Drosophila_melanogaster</i>  | <a href="#">Dmel\VhaM9.7-d</a> | 14 | 267 | 213 |  |  |
| <i>Drosophila_simulans</i>      | <a href="#">Dsim\GD19123</a>   |    | 267 |     |  |  |
| <i>Drosophila_sechellia</i>     | <a href="#">Dsec\GM15188</a>   |    | 267 |     |  |  |
| <i>Drosophila_yakuba</i>        | <a href="#">Dyak\GE24594</a>   |    | 267 |     |  |  |
| <i>Drosophila_erecta</i>        | <a href="#">Dere\GG21840</a>   |    | 267 |     |  |  |
| <i>Drosophila_biarmipes</i>     | <a href="#">Dbia\VhaM9.7-d</a> |    | 267 |     |  |  |
| <i>Drosophila_suzukii</i>       | <a href="#">Dsuz\VhaM9.7-d</a> |    | 267 |     |  |  |
| <i>Drosophila_takahashii</i>    | <a href="#">Dtak\VhaM9.7-d</a> |    | 267 |     |  |  |
| <i>Drosophila_eugracilis</i>    | <a href="#">Deug\VhaM9.7-d</a> |    | 267 |     |  |  |
| <i>Drosophila_elegans</i>       | <a href="#">Dele\VhaM9.7-d</a> |    | 267 |     |  |  |
| <i>Drosophila_rhopaloea</i>     | <a href="#">Drho\VhaM9.7-d</a> |    | 267 |     |  |  |
| <i>Drosophila_ficusphila</i>    | <a href="#">Dfic\VhaM9.7-d</a> |    | 267 |     |  |  |
| <i>Drosophila_kikkawai</i>      | <a href="#">Dkik\VhaM9.7-d</a> |    | 267 |     |  |  |
| <i>Drosophila_bipectinata</i>   | <a href="#">Dbip\VhaM9.7-d</a> |    | 267 |     |  |  |
| <i>Drosophila_ananassae</i>     | <a href="#">Dana\GF17072</a>   |    | 267 |     |  |  |
| <i>Drosophila_pseudoobscura</i> | <a href="#">Dpse\GA13345</a>   |    | 267 |     |  |  |
| <i>Drosophila_persimilis</i>    | <a href="#">Dper\GL24534</a>   |    | 267 |     |  |  |

|                              |                                |  |     |  |  |  |  |
|------------------------------|--------------------------------|--|-----|--|--|--|--|
| <i>Drosophila_miranda</i>    | <a href="#">Dmir\VhaM9.7-d</a> |  | 267 |  |  |  |  |
| <i>Drosophila_willistoni</i> | <a href="#">Dwi\GK18963</a>    |  | 267 |  |  |  |  |
| <i>Drosophila_albomicans</i> |                                |  |     |  |  |  |  |
| <i>Drosophila_mojavensis</i> | <a href="#">Dmoj\GI23846</a>   |  | 267 |  |  |  |  |
| <i>Drosophila_virilis</i>    | <a href="#">Dvir\GJ10560</a>   |  | 267 |  |  |  |  |
| <i>Drosophila_grimshawi</i>  | <a href="#">Dgr\GH19550</a>    |  | 267 |  |  |  |  |
