# Supplementary material for: Structural and Comparative Analyses of Insects Suggest the Presence of an Ultra-Conserved Regulatory Element of the Genes Encoding Vacuolar-Type ATPase Subunits and Assembly Factors
Source: MDPI journal article supplement (doi:10.3390/biology12081127), 2023-08-13
Supplement: s1 [file s1]

Supplementary Figure S1. DNA Logo and DNA Positional Matrix describing the dCLEAR motif in Drosophilidae species. The sequences used to build the matrix are reported.

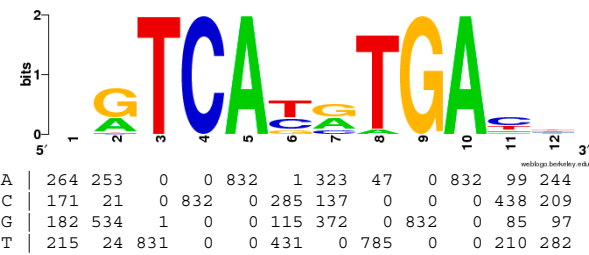

>Dmel\Atp6v0a2  
TATCATGTGATC  
>Dsim\Atp6v0a2  
TATCATGTGATC  
>Dsec\Atp6v0a2  
TATCATGTGATC  
>Dyak\Atp6v0a2  
CATCATGTGATC  
>Dere\Atp6v0a2  
CATCATGTGATC  
>Dbia\Atp6v0a2  
TATCATGTGATC  
>Dtak\Atp6v0a2  
TATCATGTGATC  
>Deug\Atp6v0a2  
TATCATGTGATC  
>Dele\Atp6v0a2  
TATCATGTGATC  
>Drho\Atp6v0a2  
TATCATGTGATC  
>Dfic\Atp6v0a2  
TATCATGTGATC  
>Dkik\Atp6v0a2  
TATCATGTGATC  
>Dbip\Atp6v0a2  
TATCATGTGATC  
>Dana\Atp6v0a2  
TATCATGTGATA  
>Dpse\Atp6v0a2  
TATCATGTGATC  
>Dper\Atp6v0a2  
TATCATGTGATC  
>Dwil\Atp6v0a2  
CGTCATGTGATC  
>Dmoj\Atp6v0a2  
TATCATGTGACC  
>Dvir\Atp6v0a2  
TATCATGTGACC  
>Dgri\Atp6v0a2  
CATCATGTGATC

>Dmel\Atp6v0b  
CGTCATGTGATT  
>Dsim\Atp6v0b  
CGTCATGTGATT  
>Dsec\Atp6v0b

CGTCATGTGATT  
>Dyak\Atp6v0b  
CGTCATGTGATT  
>Dere\Atp6v0b  
CGTCATGTGATT  
>Dbia\Atp6v0b  
CGTCATGTGATT  
>Dsuz\Atp6v0b  
CGTCATGTGATT  
>Dtak\Atp6v0b  
CGTCATGTGATT  
>Deug\Atp6v0b  
CGTCATGTGATT  
>Dele\Atp6v0b  
CGTCATGTGATT  
>Drho\Atp6v0b  
CGTCATGTGATT  
>Dfic\Atp6v0b  
CGTCATGTGATT  
>Dkik\Atp6v0b  
CGTCATGTGATT  
>Dana\Atp6v0b  
CGTCATGTGATT  
>Dbip\Atp6v0b  
CGTCATGTGATT  
>Dpse\Atp6v0b  
CGTCATGTGATT  
>Dper\Atp6v0b  
CGTCATGTGATT  
>Dmir\Atp6v0b  
CGTCATGTGATT  
>Dwil\Atp6v0b  
AATCATGTGATT  
>Dalb\Atp6v0b  
CGTCATGTGATT  
>Dmoj\Atp6v0b  
CGTCATGTGATT  
>Dvir\Atp6v0b  
CGTCATGTGATT  
>Dgri\Atp6v0b  
CGTCATGTGATT

>Dmel\Atp6v0c1  
AATCACGTGAGT  
>Dmel\Atp6v0c2  
GGTCATGTGAGG  
>Dmel\Atp6v0c3  
AGTCACAAGACC  
>Dmel\Atp6v0c6  
GATCACATGAGT  
>Dmel\Atp6v0c7  
AATCACATGACT  
>Dmel\Atp6v0c8  
CGTCACATGAAA  
>Dmel\Atp6v0c9  
GATCATGTGACT  
>Dsim\Atp6v0c1  
AATCACGTGAGT  
>Dsim\Atp6v0c2  
GGTCATGTGAGG  
>Dsim\Atp6v0c3  
AGTCACAAGACC  
>Dsim\Atp6v0c6

GATCACATGAGT  
>Dsim\Atp6v0c7  
AATCACATGACT  
>Dsim\Atp6v0c8  
CGTCACATGAAA  
>Dsim\Atp6v0c9  
GATCATGTGACT  
>Dsec\Atp6v0c1  
AATCACGTGAGT  
>Dsec\Atp6v0c2  
GGTCATGTGAGG  
>Dsec\Atp6v0c3  
AGTCACAAGACC  
>Dsec\Atp6v0c6  
GATCACATGAGT  
>Dsec\Atp6v0c7  
AATCACATGACT  
>Dsec\Atp6v0c8  
CGTCACATGAAA  
>Dsec\Atp6v0c9  
GATCATGTGACT  
>Dyak\Atp6v0c1  
AATCACGTGAGT  
>Dyak\Atp6v0c2  
GGTCATGTGAGG  
>Dyak\Atp6v0c3  
AGTCACAAGACC  
>Dyak\Atp6v0c5  
GATCACATGAGT  
>Dyak\Atp6v0c6  
AATCACATGACT  
>Dyak\Atp6v0c7  
CGTCATATGAAA  
>Dyak\Atp6v0c8  
GATCATGTGACT  
>Dere\Atp6v0c1  
AATCACGTGAGT  
>Dere\Atp6v0c2  
GGTCATGTGAGG  
>Dere\Atp6v0c3  
AGTCACAAGACC  
>Dere\Atp6v0c4  
GATCACATGAGC  
>Dere\Atp6v0c5  
AATCACATGACT  
>Dere\Atp6v0c6  
CGTCATATGAAA  
>Dere\Atp6v0c7  
GATCATGTGACT  
>Dbia\Atp6v0c1  
AATCACGTGAGT  
>Dbia\Atp6v0c2  
GGTCATGTGAGC  
>Dbia\Atp6v0c3  
AGTCACAAGACC  
>Dbia\Atp6v0c4  
GATCACATGAGG  
>Dbia\Atp6v0c5  
CATCACATGACA  
>Dbia\Atp6v0c6  
GATCATGTGACT  
>Dsuz\Atp6v0c1  
AATCACGTGAGT

>Dsuz\Atp6v0c2  
GGTCATGTGAGG  
>Dsuz\Atp6v0c3  
AGTCACAAGACT  
>Dsuz\Atp6v0c4  
GATCATGTGACT  
>Dtak\Atp6v0c1  
AATCACGTGAGT  
>Dtak\Atp6v0c2  
GGTCATGTGAGG  
>Dtak\Atp6v0c3  
AGTCACAAGACT  
>Dtak\Atp6v0c4  
GATCACATGAGG  
>Dtak\Atp6v0c5  
AATCACATGACA  
>Dtak\Atp6v0c6  
GATCATGTGACT  
>Deug\Atp6v0c1  
AATCACGTGAGT  
>Deug\Atp6v0c2  
GGTCATGTGAGG  
>Deug\Atp6v0c3  
AGTCACAAGACC  
>Deug\Atp6v0c4  
GATCACATGAGT  
>Deug\Atp6v0c5  
AATCACATGACA  
>Deug\Atp6v0c6  
GATCATGTGACT  
>Dele\Atp6v0c1  
AATCACGTGAGT  
>Dele\Atp6v0c2  
GGTCATGTGAGG  
>Dele\Atp6v0c3  
GGTCACAAGACC  
>Dele\Atp6v0c4  
GATCACATGAGT  
>Dele\Atp6v0c5  
AATCACATGATG  
>Dele\Atp6v0c6  
GATCATGTGACT  
>Drho\Atp6v0c1  
AATCACGTGAGT  
>Drho\Atp6v0c2  
GGTCATGTGAGG  
>Drho\Atp6v0c3  
AGTCACAAGACC  
>Drho\Atp6v0c4  
GATCACATGAGT  
>Drho\Atp6v0c5  
AATCACATGATG  
>Drho\Atp6v0c6  
GATCATGTGACT  
>Dfic\Atp6v0c1  
AATCACGTGAGT  
>Dfic\Atp6v0c2  
GGTCATGTGAGG  
>Dfic\Atp6v0c3  
AGTCACAAGACC  
>Dfic\Atp6v0c4  
GATCACAAAGAGA  
>Dfic\Atp6v0c5

GATCACATGATG  
>Dfic\Atp6v0c6  
GATCATGTGACT  
>Dkik\Atp6v0c1  
AATCACGTGAGT  
>Dkik\Atp6v0c2  
CGTCATGTGAGC  
>Dkik\Atp6v0c3  
AGTCACAAGACC  
>Dkik\Atp6v0c4  
GATCACATGAGC  
>Dkik\Atp6v0c5  
AGTCACATGACG  
>Dkik\Atp6v0c6  
GATCATGTGACT  
>Dbip\Atp6v0c1  
AATCACGTGAGT  
>Dbip\Atp6v0c2  
GGTCATGTGAGA  
>Dbip\Atp6v0c3  
AGTCACAAGACC  
>Dbip\Atp6v0c4  
GATCACATGAGT  
>Dbip\Atp6v0c5  
AGTCACATGACC  
>Dbip\Atp6v0c6  
GATCATGTGACT  
>Dana\Atp6v0c1  
AATCACGTGAGT  
>Dana\Atp6v0c2  
GGTCATGTGAGA  
>Dana\Atp6v0c3  
AGTCACAAGACC  
>Dana\Atp6v0c4  
GATCACATGAGT  
>Dana\Atp6v0c5  
AGTCACATGACT  
>Dana\Atp6v0c6  
GATCATGTGACT  
>Dpse\Atp6v0c1  
AATCACGTGAGT  
>Dpse\Atp6v0c2  
GGTCATATGAGG  
>Dpse\Atp6v0c3  
AGTCACAAGACC  
>Dpse\Atp6v0c4  
GATCACATGAGC  
>Dpse\Atp6v0c5  
AATCACATGACT  
>Dpse\Atp6v0c6  
GATCATGTGACT  
>Dper\Atp6v0c1  
AATCACGTGAGT  
>Dper\Atp6v0c2  
GGTCATATGAGG  
>Dper\Atp6v0c5  
AATCACATGACT  
>Dper\Atp6v0c6  
GATCATGTGACT  
>Dmir\Atp6v0c1  
AATCACGTGAGT  
>Dmir\Atp6v0c2  
GGTCATATGAGG

>Dmir\Atp6v0c3  
AGTCACAAGACC  
>Dmir\Atp6v0c4  
GATCACATGAGC  
>Dmir\Atp6v0c5  
AATCACATGACT  
>Dmir\Atp6v0c6  
GATCATGTGACT  
>Dwil\Atp6v0c1  
AATCACGTGAGT  
>Dwil\Atp6v0c2  
AGTCACATGAGT  
>Dwil\Atp6v0c3  
AGTCACAAGACC  
>Dwil\Atp6v0c4  
GATCACATGAGT  
>Dwil\Atp6v0c5  
AATCACATGACC  
>Dwil\Atp6v0c6  
GATCATGTGACT  
>Dalb\Atp6v0c1  
AATCACGTGAGT  
>Dalb\Atp6v0c2  
AGTCATATGAGG  
>Dalb\Atp6v0c3  
AGTCACAAGACC  
>Dalb\Atp6v0c5  
AATCACATGACT  
>Dalb\Atp6v0c6  
AGTCATGTGACG  
>Dmoj\Atp6v0c1  
AATCACGTGAGT  
>Dmoj\Atp6v0c2  
AGTCATGTGAGG  
>Dmoj\Atp6v0c3  
AGTCACAAGACC  
>Dmoj\Atp6v0c4  
GATCACAAGAAG  
>Dmoj\Atp6v0c5  
AGTCACATGACA  
>Dmoj\Atp6v0c6  
GGTCATATGAAA  
>Dmoj\Atp6v0c7  
GGTCATGTGACC  
>Dvir\Atp6v0c1  
AATCACGTGAGT  
>Dvir\Atp6v0c2  
AGTCATATGAGG  
>Dvir\Atp6v0c3  
AGTCACAAGACC  
>Dvir\Atp6v0c4  
GATCAAATGAAC  
>Dvir\Atp6v0c5  
TGTCACATGACA  
>Dvir\Atp6v0c6  
CGTCATATGAAA  
>Dvir\Atp6v0c7  
GGTCATGTGACC  
>Dgri\Atp6v0c1  
AATCACGTGAGT  
>Dgri\Atp6v0c2  
AGTCATATGAGG  
>Dgri\Atp6v0c3

AGTCACAAGACC  
>Dgri\Atp6v0c4  
GATCACATGATC  
>Dgri\Atp6v0c5  
AATCACATGACA  
>Dgri\Atp6v0c6  
CGTCATATGAAA  
>Dgri\Atp6v0c7  
GGTCATGTGATT

>Dmel\Atp6v0d1  
AATCATATGACT  
>Dmel\Atp6v0d2  
GGTCACATGACC  
>Dsim\Atp6v0d1  
AATCATATGACT  
>Dsim\Atp6v0d2  
GGTCACATGACC  
>Dsec\Atp6v0d1  
AATCATATGACT  
>Dsec\Atp6v0d2  
GGTCACATGACC  
>Dyak\Atp6v0d1  
AATCATATGACT  
>Dyak\Atp6v0d2  
GGTCACATGACC  
>Dere\Atp6v0d1  
AATCATATGACT  
>Dere\Atp6v0d2  
GGTCACATGACC  
>Dbia\Atp6v0d1  
AATCATATGACT  
>Dbia\Atp6v0d2  
GGTCACATGACC  
>Dsuz\Atp6v0d1  
AATCATATGACT  
>Dsuz\Atp6v0d2  
GGTCACATGACC  
>Dtak\Atp6v0d1  
AATCATATGACT  
>Dtak\Atp6v0d2  
GGTCACATGACC  
>Deug\Atp6v0d1  
AATCATATGACT  
>Deug\Atp6v0d2  
GGTCACATGACC  
>Dele\Atp6v0d1  
AATCATATGACT  
>Dele\Atp6v0d2  
GGTCACATGACC  
>Drho\Atp6v0d1  
AATCATATGACT  
>Drho\Atp6v0d2  
GGTCACATGACC  
>Dfic\Atp6v0d1  
AATCATATGACT  
>Dfic\Atp6v0d2  
GGTCACATGACC  
>Dkik\Atp6v0d1  
AATCATATGACT

>Dkik\Atp6v0d2  
GGTCACATGACC  
>Dbip\Atp6v0d1  
AATCATATGACT  
>Dbip\Atp6v0d2  
AATCACATGACC  
>Dana\Atp6v0d1  
AATCATATGACT  
>Dana\Atp6v0d2  
CCTCACATGACC  
>Dpse\Atp6v0d1  
AATCATATGACT  
>Dpse\Atp6v0d2  
TGTTCATGTGACC  
>Dper\Atp6v0d1  
AATCATATGACT  
>Dper\Atp6v0d2  
TGTTCATGTGACC  
>Dmir\Atp6v0d1  
AATCATATGACT  
>Dmir\Atp6v0d2  
TGTTCATGTGACC  
>Dwil\Atp6v0d1  
AGTCATATGACT  
>Dwil\Atp6v0d2  
AGTCATGTGACG  
>Dalb\Atp6v0d1  
AATCATATGACT  
>Dalb\Atp6v0d2  
AGTCACATGACG  
>Dmoj\Atp6v0d1  
AATCATATGACT  
>Dmoj\Atp6v0d2  
AGTCACATGACG  
>Dvir\Atp6v0d1  
AATCATATGACT  
>Dvir\Atp6v0d2  
GGTCACATGACT  
>Dgri\Atp6v0d1  
AATCATATGACT  
>Dgri\Atp6v0d2  
AGTCACATGACA

>Dmel\Atp6v0e  
CGTCATGTGATA  
>Dsim\Atp6v0e  
CGTCATGTGATA  
>Dsec\Atp6v0e  
CGTCATGTGATA  
>Dyak\Atp6v0e  
CGTCATGTGATA  
>Dere\Atp6v0e  
CGTCATGTGATA  
>Dbia\Atp6v0e  
TGTTCATGTGATA  
>Dsuz\Atp6v0e  
CGTCATGTGATA  
>Dtak\Atp6v0e  
CGTCATGTGATA  
>Deug\Atp6v0e  
CGTCATGTGATA  
>Dele\Atp6v0e  
CGTCATGTGATA



>Drho\Atp6v0e  
CGTCATGTGATA  
>Dfic\Atp6v0e  
CGTCATGTGATA  
>Dkik\Atp6v0e  
TGTCATGTGATA  
>Dbip\Atp6v0e  
TGTCATGTGATA  
>Dana\Atp6v0e  
TGTCATGTGATA  
>Dpse\Atp6v0e  
TGTCATGTGATA  
>Dper\Atp6v0e  
TGTCATGTGATA  
>Dmir\Atp6v0e  
TGTCATGTGATA  
>Dwil\Atp6v0e  
TGTCATGTGATT  
>Dalb\Atp6v0e  
TGTCATGTGATA  
>Dvir\Atp6v0e  
TGTCATGTGATA  
>Dmoj\Atp6v0e  
TGTCATGTGATA  
>Dgri\Atp6v0e  
TGTCATGTGATA

>Dmel\Atp6v1A1  
TGTCAGCTGACC  
>Dmel\Atp6v1A2  
TGTCAGCTGACG  
>Dmel\Atp6v1A3  
TGTCACGTGAAA  
>Dmel\Atp6v1A4  
TGTCAGCTGACA  
>Dsim\Atp6v1A1  
TGTCAGCTGACC  
>Dsim\Atp6v1A2  
TGTCAGCTGACG  
>Dsim\Atp6v1A3  
TGTCACGTGAAA  
>Dsim\Atp6v1A4  
TGTCAGCTGACA  
>Dsec\Atp6v1A1  
TGTCAGCTGACC  
>Dsec\Atp6v1A2  
TGTCAGCTGACG  
>Dsec\Atp6v1A3  
TGTCACGTGAAA  
>Dsec\Atp6v1A4  
TGTCAGCTGACA  
>Dyak\Atp6v1A1  
TGTCAGCTGACC  
>Dyak\Atp6v1A2  
TGTCAGCTGACG  
>Dyak\Atp6v1A3  
TGTCACGTGAAG  
>Dyak\Atp6v1A4  
TGTCAGCTGACA  
>Dere\Atp6v1A1  
TGTCAGCTGACC  
>Dere\Atp6v1A2  
TGTCAGCTGACG

>Dere\Atp6v1A3  
CGTCACGTGAAA  
>Dere\Atp6v1A4  
TGTTCAGCTGACA  
>Dbia\Atp6v1A1  
TGTTCAGCTGACC  
>Dbia\Atp6v1A2  
TGTTCAGCTGACG  
>Dbia\Atp6v1A3  
TGTTCACGTGAAC  
>Dbia\Atp6v1A4  
CGTCAGCTGACG  
>Dtak\Atp6v1A1  
TGTTCAGCTGACC  
>Dtak\Atp6v1A2  
TGTTCAGCTGACG  
>Dtak\Atp6v1A3  
TGTTCACGTGAAA  
>Dtak\Atp6v1A4  
TGTTCAGCTGACA  
>Deug\Atp6v1A1  
TGTTCAGCTGACC  
>Deug\Atp6v1A2  
TGTTCAGCTGACG  
>Deug\Atp6v1A3  
TGTTCACGTGAAA  
>Deug\Atp6v1A4  
TGTTCAGCTGACA  
>Dele\Atp6v1A1  
TGTTCAGCTGACC  
>Dele\Atp6v1A2  
TGTTCAGCTGACG  
>Dele\Atp6v1A3  
TGTTCACGTGAAA  
>Dele\Atp6v1A4  
TGTTCAGCTGACA  
>Drho\Atp6v1A1  
TGTTCAGCTGACC  
>Drho\Atp6v1A2  
TGTTCAGCTGACG  
>Drho\Atp6v1A3  
TGTTCACGTGAAA  
>Drho\Atp6v1A4  
TGTTCAGCTGACA  
>Dfic\Atp6v1A1  
TGTTCAGCTGACC  
>Dfic\Atp6v1A2  
CGTCAGCTGACG  
>Dfic\Atp6v1A3  
TGTTCACGTGAAA  
>Dfic\Atp6v1A4  
TGTTCAGCTGACA  
>Dkik\Atp6v1A1  
TGTTCAGCTGACC  
>Dkik\Atp6v1A2  
TGTTCAGCTGACG  
>Dkik\Atp6v1A3  
TGTTCACGTGAAA  
>Dkik\Atp6v1A4  
TGTTCAGCTGACA  
>Dbip\Atp6v1A1  
TGTTCAGCTGACC  
>Dbip\Atp6v1A2

TGTCAGCTGACA  
>Dbip\Atp6v1A3  
TGTCACGTGAAC  
>Dbip\Atp6v1A4  
CGTCAGCTGACA  
>Dana\Atp6v1A1  
TGTCAGCTGACC  
>Dana\Atp6v1A2  
TGTCAGCTGACA  
>Dana\Atp6v1A3  
TGTCACGTGAAC  
>Dana\Atp6v1A4  
CGTCAGCTGACA  
>Dpse\Atp6v1A1  
TGTCAGCTGACC  
>Dpse\Atp6v1A2  
TGTCAGCTGACG  
>Dpse\Atp6v1A3  
TGTCACGTGAAA  
>Dpse\Atp6v1A4  
TGTCAGCTGACA  
>Dper\Atp6v1A1  
TGTCAGCTGACC  
>Dper\Atp6v1A2  
TGTCAGCTGACG  
>Dper\Atp6v1A3  
TGTCACGTGAAA  
>Dper\Atp6v1A4  
TGTCAGCTGACA  
>Dmir\Atp6v1A1  
TGTCAGCTGACC  
>Dmir\Atp6v1A2  
TGTCAGCTGACG  
>Dmir\Atp6v1A3  
TGTCACGTGAAA  
>Dmir\Atp6v1A4  
TGTCAGCTGACA  
>Dwil\Atp6v1A1  
TGTCAGCTGACC  
>Dwil\Atp6v1A2  
TGTCAGCTGACA  
>Dwil\Atp6v1A3  
TGTCACGTGAAA  
>Dalb\Atp6v1A1  
AGTCAGCTGACC  
>Dalb\Atp6v1A2  
TGTCAGCTGACA  
>Dalb\Atp6v1A4  
TGTCAGCTGACA  
>Dmoj\Atp6v1A1  
AGTCAGCTGACC  
>Dmoj\Atp6v1A2  
TGTCAGCTGACA  
>Dmoj\Atp6v1A3  
TGTCACGTGAAA  
>Dmoj\Atp6v1A4  
TGTCAGCTGACA  
>Dvir\Atp6v1A1  
AGTCAGCTGACC  
>Dvir\Atp6v1A2  
CGTCAGCTGACA  
>Dvir\Atp6v1A3  
TGTCACGTGAAA

>Dvir\Atp6v1A4  
TGTTCAGCTGACA  
>Dgri\Atp6v1A1  
AGTTCAGCTGACC  
>Dgri\Atp6v1A2  
TGTTCAGCTGACA  
>Dgri\Atp6v1A3  
TGTTCACGTGAAA  
>Dgri\Atp6v1A4  
TGTTCAGCTGACA

>Dmel\Atp6v1B1  
GGTCATGTGACG  
>Dmel\Atp6v1B2  
CGTCACATGACC  
>Dmel\Atp6v1B3  
AGTTCAGCTGACA  
>Dmel\Atp6v1B4  
TTTCATGTGAGC  
>Dsim\Atp6v1B1  
GGTCATGTGACG  
>Dsim\Atp6v1B2  
CGTCACATGACC  
>Dsim\Atp6v1B3  
AGTTCAGCTGACA  
>Dsim\Atp6v1B4  
TTTCATGTGAGC  
>Dsec\Atp6v1B1  
GGTCATGTGACG  
>Dsec\Atp6v1B2  
CGTCACATGACC  
>Dsec\Atp6v1B3  
AGTTCAGCTGACA  
>Dsec\Atp6v1B4  
TTTCATGTGAGC  
>Dyak\Atp6v1B1  
GGTCATGTGACG  
>Dyak\Atp6v1B2  
CGTCACATGACC  
>Dyak\Atp6v1B3  
AGTTCAGCTGACA  
>Dyak\Atp6v1B4  
TTTCATGTGAGC  
>Dere\Atp6v1B1  
GGTCATGTGACG  
>Dere\Atp6v1B2  
CGTCACATGACC  
>Dere\Atp6v1B3  
AGTTCAGCTGACA  
>Dere\Atp6v1B4  
TTTCATGTGAGC  
>Dbia\Atp6v1B1  
GGTCATGTGATG  
>Dbia\Atp6v1B2  
CGTCACATGACC  
>Dbia\Atp6v1B3  
AGTTCAGCTGACA  
>Dbia\Atp6v1B4  
TTTCATGTGAGC  
>Dsuz\Atp6v1B1  
GGTCATGTGATG  
>Dsuz\Atp6v1B2  
CGTCACATGACC

>Dsuz\Atp6v1B3  
AGTCAGCTGACA  
>Dsuz\Atp6v1B4  
TTTCATGTGAGC  
>Dtak\Atp6v1B1  
GGTCATGTGATG  
>Dtak\Atp6v1B2  
CGTCACATGACC  
>Dtak\Atp6v1B3  
AGTCAGCTGACA  
>Dtak\Atp6v1B4  
TTTCATGTGAGC  
>Deug\Atp6v1B1  
GGTCATGTGACG  
>Deug\Atp6v1B2  
CGTCACATGACC  
>Deug\Atp6v1B3  
AGTCAGCTGACA  
>Deug\Atp6v1B4  
TTTCATGTGAGC  
>Dele\Atp6v1B1  
GGTCATGTGACG  
>Dele\Atp6v1B2  
CGTCACATGACC  
>Dele\Atp6v1B3  
AGTCAGCTGACA  
>Dele\Atp6v1B4  
TTTCATGTGAGC  
>Drho\Atp6v1B1  
GGTCATGTGACG  
>Drho\Atp6v1B2  
CGTCACATGACC  
>Drho\Atp6v1B3  
AGTCAGCTGACA  
>Drho\Atp6v1B4  
TTTCATGTGAGC  
>Dfic\Atp6v1B1  
GGTCATGTGACG  
>Dfic\Atp6v1B2  
CGTCACATGACC  
>Dfic\Atp6v1B3  
AGTCAGCTGACA  
>Dfic\Atp6v1B4  
TTTCATGTGAGC  
>Dkik\Atp6v1B1  
AGTCATGTGACG  
>Dkik\Atp6v1B2  
CGTCACATGACC  
>Dkik\Atp6v1B3  
AGTCAGCTGACA  
>Dkik\Atp6v1B4  
TTTCATGTGAGC  
>Dbip\Atp6v1B1  
TGTCATGTGACG  
>Dbip\Atp6v1B2  
CGTCACATGACC  
>Dbip\Atp6v1B3  
AGTCAGCTGACA  
>Dbip\Atp6v1B4  
TTTCATGTGAGC  
>Dana\Atp6v1B1  
TGTCATGTGACG  
>Dana\Atp6v1B2

CGTCACATGACC  
>Dana\Atp6v1B3  
AGTCAGCTGACA  
>Dana\Atp6v1B4  
TTTCATGTGAGC  
>Dpse\Atp6v1B1  
AGTCATGTGATG  
>Dpse\Atp6v1B2  
CGTCACATGACT  
>Dpse\Atp6v1B3  
AGTCAGCTGACA  
>Dpse\Atp6v1B4  
GTTCATGTGAGC  
>Dper\Atp6v1B1  
AGTCATGTGATG  
>Dper\Atp6v1B2  
CGTCACATGACT  
>Dper\Atp6v1B3  
AGTCAGCTGACA  
>Dper\Atp6v1B4  
GTTCATGTGAGC  
>Dmir\Atp6v1B1  
AGTCATGTGATG  
>Dmir\Atp6v1B2  
CGTCACATGACT  
>Dmir\Atp6v1B3  
AGTCAGCTGACA  
>Dmir\Atp6v1B4  
GTTCATGTGAGC  
>Dwil\Atp6v1B1  
GGTCATGTGATG  
>Dwil\Atp6v1B2  
TGTCACATGACT  
>Dwil\Atp6v1B3  
AGTCAGCTGACA  
>Dwil\Atp6v1B4  
TTTCATGTGAGC  
>Dalb\Atp6v1B1  
AGTCATGTGATG  
>Dalb\Atp6v1B2  
TGTCACATGACT  
>Dalb\Atp6v1B3  
AGTCAGCTGACT  
>Dalb\Atp6v1B4  
TTTCATGTGAGC  
>Dmoj\Atp6v1B1  
AGTCATGTGACG  
>Dmoj\Atp6v1B2  
TGTCACATGACT  
>Dmoj\Atp6v1B3  
TGTCAGCTGACT  
>Dmoj\Atp6v1B4  
ATTTCATGTGAAG  
>Dvir\Atp6v1B1  
AGTCATGTGACG  
>Dvir\Atp6v1B2  
TGTCACATGACT  
>Dvir\Atp6v1B3  
AGTCAGCTGACT  
>Dvir\Atp6v1B4  
ATTTCATGTGAGC  
>Dgri\Atp6v1B1  
AGTCATGTGACG

>Dgri\Atp6v1B2  
TGTTCACATGACT  
>Dgri\Atp6v1B3  
AGTCAGCTGACT  
>Dgri\Atp6v1B4  
GTGCATGTGAGC

>Dmel\Atp6v1C1  
CATTCACGTGAAT  
>Dmel\Atp6v1C2  
TGTTCATGTGACT  
>Dsim\Atp6v1C1  
CATTCACGTGAAT  
>Dsim\Atp6v1C2  
TGTTCATGTGACT  
>Dsec\Atp6v1C1  
CATTCACGTGAAT  
>Dsec\Atp6v1C2  
TGTTCATGTGACT  
>Dyak\Atp6v1C1  
CATTCACGTGAAT  
>Dyak\Atp6v1C2  
TGTTCATGTGACT  
>Dere\Atp6v1C1  
CATTCACGTGAAT  
>Dere\Atp6v1C2  
TGTTCATGTGACT  
>Dbia\Atp6v1C1  
CATTCACGTGAAT  
>Dbia\Atp6v1C2  
TGTTCATGTGACT  
>Dtak\Atp6v1C1  
CATTCACGTGAAT  
>Dtak\Atp6v1C2  
TGTTCATGTGACT  
>Deug\Atp6v1C1  
CATTCACGTGAAT  
>Deug\Atp6v1C2  
TGTTCATGTGACT  
>Dele\Atp6v1C1  
TATTCACGTGAAT  
>Dele\Atp6v1C2  
TGTTCATGTGACT  
>Drho\Atp6v1C1  
TATTCACGTGAAT  
>Drho\Atp6v1C2  
TGTTCATGTGACT  
>Dfic\Atp6v1C1  
CATTCACGTGAAT  
>Dfic\Atp6v1C2  
TGTTCATGTGACT  
>Dkik\Atp6v1C1  
TATTCACGTGAAT  
>Dkik\Atp6v1C2  
TGTTCATGTGACT  
>Dbip\Atp6v1C1  
CATTCACGTGAAA  
>Dbip\Atp6v1C2  
TGTTCATGTGACT  
>Dana\Atp6v1C1  
CATTCACGTGAAT  
>Dana\Atp6v1C2  
TGTTCATGTGACT

>Dpse\Atp6v1C1  
CA**TCACGTGA**AT  
>Dpse\Atp6v1C2  
TG**TCATGTGA**CT  
>Dper\Atp6v1C1  
CA**TCACGTGA**AT  
>Dper\Atp6v1C2  
TG**TCATGTGA**CT  
>Dmir\Atp6v1C1  
CA**TCACGTGA**AT  
>Dmir\Atp6v1C2  
TG**TCATGTGA**CT  
>Dwil\Atp6v1C1  
TA**TCACGTGA**AT  
>Dwil\Atp6v1C2  
TG**TCATGTGA**CA  
>Dmoj\Atp6v1C1  
TA**TCACGTGA**AT  
>Dmoj\Atp6v1C2  
TG**TCATGTGA**CT  
>Dvir\Atp6v1C1  
TA**TCACGTGA**AT  
>Dvir\Atp6v1C2  
TG**TCATGTGA**CT  
>Dgri\Atp6v1C1  
TA**TCACGTGA**AT  
>Dgri\Atp6v1C2  
TG**TCATGTGA**CT

>Dmel\Atp6v1D1  
GG**TCATCTGA**CT  
>Dmel\Atp6v1D2  
AG**TCACATGA**CA  
>Dsim\Atp6v1D1  
GG**TCATCTGA**CT  
>Dsim\Atp6v1D2  
AG**TCACATGA**CA  
>Dsec\Atp6v1D1  
GG**TCATCTGA**CT  
>Dsec\Atp6v1D2  
AG**TCACATGA**CA  
>Dyak\Atp6v1D1  
GG**TCATCTGA**CT  
>Dyak\Atp6v1D2  
AG**TCACATGA**CA  
>Dere\Atp6v1D1  
GG**TCATCTGA**CT  
>Dere\Atp6v1D2  
AG**TCACATGA**CA  
>Dbia\Atp6v1D1  
GG**TCATCTGA**CT  
>Dbia\Atp6v1D2  
GG**TCACATGA**CA  
>Dtak\Atp6v1D1  
GG**TCATCTGA**CT  
>Dtak\Atp6v1D2  
GG**TCACATGA**CA  
>Deug\Atp6v1D1  
GG**TCATCTGA**CT  
>Deug\Atp6v1D2  
AG**TCACATGA**CA  
>Dele\Atp6v1D1  
GG**TCATCTGA**CT



>Dele\Atp6v1D2  
AGTCACATGACA  
>Drho\Atp6v1D1  
GGTCATCTGACT  
>Drho\Atp6v1D2  
GGTCACATGACA  
>Dfic\Atp6v1D1  
GGTCATCTGACT  
>Dfic\Atp6v1D2  
AGTCACATGACA  
>Dkik\Atp6v1D1  
GGTCATCTGACT  
>Dkik\Atp6v1D2  
AGTCACATGACA  
>Dbip\Atp6v1D1  
GGTCATCTGACT  
>Dbip\Atp6v1D2  
GGTCACATGACA  
>Dana\Atp6v1D1  
GGTCATCTGACT  
>Dana\Atp6v1D2  
GGTCACATGACA  
>Dpse\Atp6v1D1  
AGTCATCTGACT  
>Dpse\Atp6v1D2  
GGTCACATGACT  
>Dper\Atp6v1D1  
AGTCATCTGACT  
>Dper\Atp6v1D2  
GGTCACATGACT  
>Dmir\Atp6v1D1  
AGTCATCTGACT  
>Dmir\Atp6v1D2  
GGTCACATGACT  
>Dwil\Atp6v1D1  
GGTCATCTGACT  
>Dwil\Atp6v1D2  
AATCACATGACT  
>Dalb\Atp6v1D1  
GGTCATCTGACT  
>Dalb\Atp6v1D2  
AGTCATGTGACA  
>Dmoj\Atp6v1D1  
GGTCATCTGACT  
>Dmoj\Atp6v1D2  
AGTCATGTGACA  
>Dvir\Atp6v1D1  
GGTCATCTGACT  
>Dvir\Atp6v1D2  
AGTCATGTGACA  
>Dgri\Atp6v1D1  
GGTCATCTGACT  
>Dgri\Atp6v1D2  
AGTCATGTGACA  
  
>Dmel\Atp6v1E1  
AATCATATGATC  
>Dmel\Atp6v1E2  
GGTCATGTGAAC  
>Dmel\Atp6v1E3  
GGTCATGTGACA  
>Dmel\Atp6v1E4  
TATCATGTGACA

>Dsim\Atp6v1E1  
AATCATATGATC  
>Dsim\Atp6v1E2  
GGTCATGTGAAC  
>Dsim\Atp6v1E3  
GGTCATGTGACA  
>Dsim\Atp6v1E4  
TATCATGTGACA  
>Dsec\Atp6v1E1  
AATCATATGATC  
>Dsec\Atp6v1E2  
GGTCATGTGAAC  
>Dsec\Atp6v1E3  
GGTCATGTGACA  
>Dsec\Atp6v1E4  
TATCATGTGACA  
>Dyak\Atp6v1E1  
AATCATATGATC  
>Dyak\Atp6v1E2  
GGTCATGTGAAC  
>Dyak\Atp6v1E3  
GGTCATGTGACA  
>Dyak\Atp6v1E4  
TATCATGTGACA  
>Dere\Atp6v1E1  
AATCATATGATC  
>Dere\Atp6v1E2  
GGTCATGTGAAC  
>Dere\Atp6v1E3  
GGTCATGTGACA  
>Dere\Atp6v1E4  
TATCATGTGACA  
>Dbia\Atp6v1E1  
AATCATATGATC  
>Dbia\Atp6v1E2  
GGTCATGTGAAC  
>Dbia\Atp6v1E3  
GGTCATGTGACA  
>Dbia\Atp6v1E4  
TATCATGTGACG  
>Dsuz\Atp6v1E1  
AATCATATGATC  
>Dsuz\Atp6v1E2  
AGTCATGTGAAC  
>Dsuz\Atp6v1E3  
GGTCATGTGACA  
>Dsuz\Atp6v1E4  
TATCATGTGACG  
>Dtak\Atp6v1E1  
AATCATATGATC  
>Dtak\Atp6v1E2  
AGTCATGTGAAC  
>Dtak\Atp6v1E3  
GGTCATGTGACA  
>Dtak\Atp6v1E4  
TATCATGTGACG  
>Deug\Atp6v1E1  
AATCATATGATC  
>Deug\Atp6v1E2  
AGTCATGTGAAC  
>Deug\Atp6v1E3  
GGTCATGTGACA  
>Deug\Atp6v1E4

AA~~TCATGTG~~ACA  
>Dele\Atp6v1E1  
AA~~TCATATG~~ATC  
>Dele\Atp6v1E2  
AG~~TCATGTG~~AAC  
>Dele\Atp6v1E3  
GG~~TCATGTG~~ACA  
>Dele\Atp6v1E4  
TA~~TCATGTG~~ACA  
>Drho\Atp6v1E1  
AA~~TCATATG~~ATC  
>Drho\Atp6v1E2  
AG~~TCATGTG~~AAC  
>Drho\Atp6v1E3  
GG~~TCATGTG~~ACA  
>Drho\Atp6v1E4  
TA~~TCATGTG~~ACG  
>Dfic\Atp6v1E1  
AA~~TCATATG~~ATC  
>Dfic\Atp6v1E2  
AG~~TCATGTG~~AAC  
>Dfic\Atp6v1E3  
AG~~TCATGTG~~ACA  
>Dfic\Atp6v1E4  
AA~~TCATGTG~~ACA  
>Dkik\Atp6v1E1  
AA~~TCATATG~~ATC  
>Dkik\Atp6v1E2  
AG~~TCATGTG~~AAC  
>Dkik\Atp6v1E3  
GG~~TCATGTG~~ACA  
>Dkik\Atp6v1E4  
AG~~TCATGTG~~ACG  
>Dbip\Atp6v1E1  
AA~~TCATATG~~ATC  
>Dbip\Atp6v1E2  
AG~~TCATGTG~~AAT  
>Dbip\Atp6v1E3  
GG~~TCATGTG~~ACA  
>Dbip\Atp6v1E4  
TA~~TCATGTG~~ATG  
>Dana\Atp6v1E1  
AA~~TCATATG~~ATC  
>Dana\Atp6v1E2  
AG~~TCATGTG~~AAC  
>Dana\Atp6v1E3  
GG~~TCATGTG~~ACA  
>Dana\Atp6v1E4  
AA~~TCATGTG~~ATG  
>Dpse\Atp6v1E1  
AA~~TCATATG~~ATC  
>Dpse\Atp6v1E2  
AG~~TCATGTG~~AAT  
>Dpse\Atp6v1E3  
GG~~TCATGTG~~ACA  
>Dper\Atp6v1E1  
AA~~TCATATG~~ATC  
>Dper\Atp6v1E2  
AG~~TCATGTG~~AAT  
>Dper\Atp6v1E3  
GG~~TCATGTG~~ACA  
>Dmir\Atp6v1E1  
AA~~TCATATG~~ATC

>Dmir\Atp6v1E2  
AGTCATGTGAAT  
>Dmir\Atp6v1E3  
GGTCATGTGACA  
>Dwil\Atp6v1E1  
CATCATATGATT  
>Dwil\Atp6v1E2  
AGTCATGTGATA  
>Dwil\Atp6v1E3  
GGTCATGTGACA  
>Dalb\Atp6v1E1  
AATCATATGATC  
>Dalb\Atp6v1E2  
AGTCATGTGAAT  
>Dalb\Atp6v1E3  
GGTCATGTGACA  
>Dmoj\Atp6v1E1  
AATCATATGATC  
>Dmoj\Atp6v1E2  
AGTCATGTGAAT  
>Dmoj\Atp6v1E3  
GGTCATGTGACA  
>Dmoj\Atp6v1E4  
AATCATGTGATT  
>Dvir\Atp6v1E1  
AATCATATGATC  
>Dvir\Atp6v1E2  
AGTCATGTGAAT  
>Dvir\Atp6v1E3  
GGTCATGTGACA  
>Dvir\Atp6v1E4  
AATCATGTGATT  
>Dgri\Atp6v1E1  
AATCATATGATC  
>Dgri\Atp6v1E2  
AGTCATGTGAAT  
>Dgri\Atp6v1E3  
GGTCATGTGACA  
>Dgri\Atp6v1E4  
AATCATGTGATT  
  
>Dmel\Atp6v1F  
TGTCATGTGATA  
>Dsim\Atp6v1F  
TGTCATGTGATA  
>Dsec\Atp6v1F  
TGTCATGTGATA  
>Dyak\Atp6v1F  
TGTCATGTGATA  
>Dere\Atp6v1F  
TGTCATGTGATA  
>Dbia\Atp6v1F  
GGTCATGTGATA  
>Dsuz\Atp6v1F  
GGTCATGTGATA  
>Dtak\Atp6v1F  
GGTCATGTGACA  
>Deug\Atp6v1F  
GGTCATGTGATA  
>Dele\Atp6v1F  
GGTCATGTGATA  
>Drho\Atp6v1F  
GGTCATGTGATA

>Dfic\Atp6v1F  
GGTCATGTGATA  
>Dkik\Atp6v1F  
GTTCATGTGAAG  
>Dbip\Atp6v1F  
TGTCATGTGATA  
>Dana\Atp6v1F  
TGTCATGTGATA  
>Dpse\Atp6v1F  
GGTCATGTGATA  
>Dper\Atp6v1F  
GGTCATGTGATA  
>Dmir\Atp6v1F  
GGTCATGTGATA  
>Dwil\Atp6v1F  
TGTCAGCTGACC  
>Dmoj\Atp6v1F  
CGTCAGCTGACA  
>Dvir\Atp6v1F  
CGTCAGCTGACA  
>Dgri\Atp6v1F  
AGTCAGCTGACA

>Dmel\Atp6v1G1  
CGTCATATGACA  
>Dmel\Atp6v1G2  
GGTCACATGATG  
>Dsim\Atp6v1G1  
CGTCATATGACA  
>Dsim\Atp6v1G2  
GGTCACATGATG  
>Dsec\Atp6v1G1  
CGTCATATGACA  
>Dsec\Atp6v1G2  
GGTCACATGATG  
>Dyak\Atp6v1G1  
CGTCATATGACA  
>Dyak\Atp6v1G2  
GGTCACATGATG  
>Dere\Atp6v1G1  
CGTCATATGACA  
>Dere\Atp6v1G2  
GGTCACATGATG  
>Dbia\Atp6v1G1  
CGTCATATGACA  
>Dbia\Atp6v1G2  
GGTCACATGATG  
>Dsuz\Atp6v1G1  
CGTCATATGACA  
>Dsuz\Atp6v1G2  
GGTCACATGATG  
>Dtak\Atp6v1G1  
CGTCATATGACA  
>Dtak\Atp6v1G2  
GGTCACATGATG  
>Deug\Atp6v1G1  
CGTCATATGACA  
>Deug\Atp6v1G2  
GGTCACATGATG  
>Dele\Atp6v1G1  
CGTCATATGACA  
>Dele\Atp6v1G2  
GGTCACATGATG

>Drho\Atp6v1G1  
CGTCATATGACA  
>Drho\Atp6v1G2  
GGTCACATGATG  
>Dfic\Atp6v1G1  
CGTCATATGACA  
>Dfic\Atp6v1G2  
GGTCACATGATG  
>Dkik\Atp6v1G1  
CGTCATATGACA  
>Dkik\Atp6v1G2  
GGTCACATGATG  
>Dbip\Atp6v1G1  
CGTCATATGACA  
>Dbip\Atp6v1G2  
GGTCACATGATG  
>Dana\Atp6v1G1  
CGTCATATGACA  
>Dana\Atp6v1G2  
GGTCACATGATG  
>Dpse\Atp6v1G1  
AGTCATATGACA  
>Dpse\Atp6v1G2  
GGTCACATGACT  
>Dper\Atp6v1G1  
AGTCATATGACA  
>Dper\Atp6v1G2  
GGTCACATGACT  
>Dmir\Atp6v1G1  
AGTCATATGACA  
>Dmir\Atp6v1G2  
GGTCACATGACT  
>Dwil\Atp6v1G1  
TGTCACATGATA  
>Dwil\Atp6v1G2  
AGTCACATGATT  
>Dalb\Atp6v1G1  
CGTCATATGACA  
>Dalb\Atp6v1G2  
AGTCACATGATG  
>Dmoj\Atp6v1G1  
CGTCATATGACA  
>Dmoj\Atp6v1G2  
AGTCACATGATT  
>Dvir\Atp6v1G1  
CGTCATATGACA  
>Dvir\Atp6v1G2  
AGTCACATGATT  
>Dgri\Atp6v1G1  
CGTCATATGACA  
>Dgri\Atp6v1G2  
AGTCACATGATG  
  
>Dmel\Atp6v1H1  
AGTCACAAGACC  
>Dmel\Atp6v1H2  
AGTCAGCTGAAT  
>Dsim\Atp6v1H1  
AGTCACAAGACC  
>Dsim\Atp6v1H2  
AGTCAGCTGAAT  
>Dsec\Atp6v1H1  
AGTCACAAGACC

>Dsec\Atp6v1H2  
AGTCAGCTGAAT  
>Dyak\Atp6v1H1  
AGTCACAAGACC  
>Dyak\Atp6v1H2  
AGTCAGCTGAAT  
>Dere\Atp6v1H1  
AGTCACAAGACC  
>Dere\Atp6v1H2  
AGTCAGCTGAAT  
>Dbia\Atp6v1H1  
AGTCACAAGACC  
>Dbia\Atp6v1H2  
AGTCAGCTGAAT  
>Dsuz\Atp6v1H1  
AGTCACAAGACC  
>Dsuz\Atp6v1H2  
AGTCAGCTGAAT  
>Dtak\Atp6v1H1  
AGTCACAAGACC  
>Dtak\Atp6v1H2  
AGTCAGCTGAAT  
>Deug\Atp6v1H1  
AATCACAAGACC  
>Deug\Atp6v1H2  
AGTCAGCTGAAT  
>Dele\Atp6v1H1  
AGTCACAAGACC  
>Dele\Atp6v1H2  
AGTCAGCTGAAT  
>Drho\Atp6v1H1  
AGTCACAAGACC  
>Drho\Atp6v1H2  
AGTCAGCTGAAT  
>Dfic\Atp6v1H1  
AGTCACAAGACC  
>Dfic\Atp6v1H2  
AGTCAGCTGAAT  
>Dkik\Atp6v1H1  
AGTCACAAGACC  
>Dkik\Atp6v1H2  
AGTCAGCTGAAT  
>Dbip\Atp6v1H1  
AGTCACAAGACC  
>Dbip\Atp6v1H2  
AGTCAGCTGAAT  
>Dana\Atp6v1H1  
AGTCACAAGACC  
>Dana\Atp6v1H2  
AGTCAGCTGAAT  
>Dper\Atp6v1H1  
AGTCACAAGACC  
>Dper\Atp6v1H2  
AGTCAGCTGAAT  
>Dper\Atp6v1H1  
AGTCACAAGACC  
>Dper\Atp6v1H2  
AGTCAGCTGAAT  
>Dmir\Atp6v1H1  
AGTCACAAGACC  
>Dmir\Atp6v1H2  
AGTCAGCTGAAT  
>Dwil\Atp6v1H1

AGTCACAAGACC  
>Dwil\Atp6v1H2  
AGTCAGCTGAAT  
>Dalb\Atp6v1H1  
AGTCACAAGACC  
>Dalb\Atp6v1H2  
AGTCAGCTGAAT  
>Dmoj\Atp6v1H1  
AGTCACAAGACC  
>Dmoj\Atp6v1H2  
AGTCAGCTGAAT  
>Dvir\Atp6v1H1  
AATCACAAGACC  
>Dvir\Atp6v1H2  
AGTCAGCTGAAT  
>Dgri\Atp6v1H1  
AGTCACAAGACC  
>Dgri\Atp6v1H2  
AGTCAGCTGAAT

>Dmel\Atp6ap1  
CATCACATGACC  
>Dsim\Atp6ap1  
CATCACATGACC  
>Dsec\Atp6ap1  
CATCACATGACC  
>Dyak\Atp6ap1  
CATCACATGACC  
>Dere\Atp6ap1  
CATCACATGACC  
>Dbia\Atp6ap1  
CATCACATGACC  
>Dsuz\Atp6ap1  
CATCACATGACC  
>Dtak\Atp6ap1  
CATCACATGACC  
>Deug\Atp6ap1  
CATCACATGACC  
>Dele\Atp6ap1  
CATCACATGACC  
>Drho\Atp6ap1  
CATCACATGACC  
>Dfic\Atp6ap1  
CATCACATGACC  
>Dkik\Atp6ap1  
CATCACATGACC  
>Dbip\Atp6ap1  
CATCACATGACC  
>Dana\Atp6ap1  
CATCACATGACC  
>Dpse\Atp6ap1  
GATCACATGATT  
>Dper\Atp6ap1  
GATCACATGATT  
>Dmir\Atp6ap1  
GATCACATGATT  
>Dwil\Atp6ap1  
AATCACATGACC  
>Dmoj\Atp6ap1  
CATCACATGACC  
>Dvir\Atp6ap1  
CATCACATGACC



>Dgri\Atp6ap1  
CATCACATGACA

>Dmel\Atp6ap2a  
CATCACATGATA

>Dmel\Atp6ap2b  
CGTCATATGATT

>Dsim\Atp6ap2a  
CATCACATGATA

>Dsim\Atp6ap2b  
CGTCATATGATT

>Dsec\Atp6ap2a  
CATCACATGATA

>Dsec\Atp6ap2b  
CGTCATATGATT

>Dyak\Atp6ap2a  
CATCACATGATA

>Dyak\Atp6ap2b  
CGTCATATGATT

>Dere\Atp6ap2a  
CATCACATGATA

>Dere\Atp6ap2b  
CGTCATATGATT

>Dbia\Atp6ap2a  
CATCACATGATA

>Dbia\Atp6ap2b  
CGTCATATGATT

>Dsuz\Atp6ap2a  
CATCACATGATA

>Dsuz\Atp6ap2b  
CGTCATATGATT

>Dtak\Atp6ap2a  
CATCACATGATA

>Dtak\Atp6ap2b  
CGTCATATGATT

>Deug\Atp6ap2a  
CATCACATGATA

>Deug\Atp6ap2b  
CGTCATATGATT

>Dele\Atp6ap2a  
CATCACATGATA

>Dele\Atp6ap2b  
CGTCATATGATT

>Drho\Atp6ap2a  
CATCACATGATA

>Drho\Atp6ap2b  
CGTCATATGATT

>Dfic\Atp6ap2a  
CATCACATGATA

>Dfic\Atp6ap2b  
CGTCATATGATT

>Dkik\Atp6ap2a  
CATCACATGATA

>Dkik\Atp6ap2b  
TGTTCATATGATT

>Dbip\Atp6ap2a  
CATCACATGATA

>Dbip\Atp6ap2b  
CGTCATATGATT

>Dana\Atp6ap2a  
CATCACATGATA

>Dana\Atp6ap2b  
CGTCATATGATT

>Dpse\Atp6ap2a  
CA**TCACATG**ATA  
>Dpse\Atp6ap2b  
CG**TCATATG**ATT  
>Dper\Atp6ap2a  
CA**TCACATG**ATA  
>Dper\Atp6ap2b  
CG**TCATATG**ATT  
>Dmir\Atp6ap2a  
CA**TCACATG**ATA  
>Dmir\Atp6ap2b  
CG**TCATATG**ATT  
>Dwil\Atp6ap2a  
TG**TCACATG**ACA  
>Dwil\Atp6ap2b  
TG**TCATATG**ATT  
>Dalb\Atp6ap2a  
CA**TCACATG**ACA  
>Dalb\Atp6ap2b  
CG**TCATATG**ATT  
>Dmoj\Atp6ap2a  
CA**TCACATG**ACA  
>Dmoj\Atp6ap2b  
CG**TCATATG**ATT  
>Dvir\Atp6ap2a  
CA**TCACATG**ACA  
>Dvir\Atp6ap2b  
CG**TCATATG**ATT  
>Dgri\Atp6ap2a  
CA**TCACATG**ACA  
>Dgri\Atp6ap2b  
CG**TCATATG**ATT

>Dmel\Tmem199  
TC**TCATGTG**ACA  
>Dsec\Tmem199  
TC**TCATGTG**ACA  
>Dsim\Tmem199  
TC**TCATGTG**ACA  
>Dyak\Tmem199  
TC**TCATGTG**ACA  
>Dere\Tmem199  
TC**TCATGTG**ACA  
>Dbia\Tmem199  
TC**TCATGTG**ACA  
>Dsuz\Tmem199  
TC**TCATGTG**ACA  
>Dtak\Tmem199  
TC**TCATGTG**ACA  
>Deug\Tmem199  
TC**TCATGTG**ACA  
>Dele\Tmem199  
CC**TCATGTG**ACA  
>Drho\Tmem199  
GC**TCATGTG**ACA  
>Dfic\Tmem199  
CC**TCATGTG**ACA  
>Dkik\Tmem199  
AC**TCATGTG**ACA  
>Dbip\Tmem199  
AC**TCATGTG**ACA  
>Dana\Tmem199

ACTCATGTGACA  
>Dpse\Tmem199  
ACTCATGTGACA  
>Dper\Tmem199  
ACTCATGTGACA  
>Dmir\Tmem199  
ACTCATGTGACA  
>Dwil\Tmem199  
GCTCATGTGATG  
>Dalb\Tmem199  
ACTCACATGACG  
>Dmoj\Tmem199  
ACTCATGTGACA  
>Dvir\Tmem199  
ACTCATGTGACA  
>Dgri\Tmem199  
ACTCATGTGACA  
>Dmel\Vma21  
TATCATGTGATT  
>Dsim\Vma21  
TATCATGTGATT  
>Dsec\Vma21  
TATCATGTGATT  
>Dyak\Vma21  
TATCATGTGATT  
>Dere\Vma21  
TATCATGTGATT  
>Dbia\Vma21  
TATCATGTGATT  
>Dsuz\Vma21  
TATCATGTGATT  
>Dtak\Vma21  
TATCATGTGATT  
>Dfic\Vma21  
TATCATGTGATT  
>Deug\Vma21  
TATCATGTGATT  
>Dele\Vma21  
TATCATGTGACT  
>Drho\Vma21  
TATCATGTGATT  
>Dkik\Vma21  
TATCATGTGATT  
>Dbip\Vma21  
TATCATGTGATT  
>Dana\Vma21  
TATCATGTGATT  
>Dpse\Vma21  
TATCATGTGATT  
>Dper\Vma21  
TATCATGTGATT  
>Dmir\Vma21  
TATCATGTGATT  
>Dwil\Vma21  
CATCATGTGATT  
>Dalb\Vma21  
TATCATGTGATT  
>Dmoj\Vma21  
TATCATGTGATT  
>Dvir\Vma21  
TATCATGTGATT  
>Dgri\Vma21  
TATCATGTGATT
