# Supplementary material for: Structural and Comparative Analyses of Insects Suggest the Presence of an Ultra-Conserved Regulatory Element of the Genes Encoding Vacuolar-Type ATPase Subunits and Assembly Factors
Source: MDPI journal article supplement (doi:10.3390/biology12081127), 2023-08-13
Supplement: s1 [file s1]

| Gene Cluster ID                          | Tmem199                                                     |
|------------------------------------------|-------------------------------------------------------------|
| Drosophila melanogaster dicistronic gene | CG7071                                                      |
| FlyBase ID                               | <a href="#">FBgn0260467</a>                                 |
| Predicted function                       | ATPase, H+ transporting, vacuolar ER assembly factor, Vma12 |
| Protein size                             | 302 amino acids                                             |
| Cytogenetic map                          | 3R:94A6-94A6                                                |
| Gene sequence location                   | <a href="#">3R:18188619..18190306</a> [+]                   |
| Dmel CLEAR sequence                      | TCATGTGA                                                    |
| CLEAR sequence location                  | 3R:18188617..18188624                                       |

**NOTE: Dicistronic gene with dicistronic transcript.**

**FlyBase gene model & CLEAR element (red) position:**

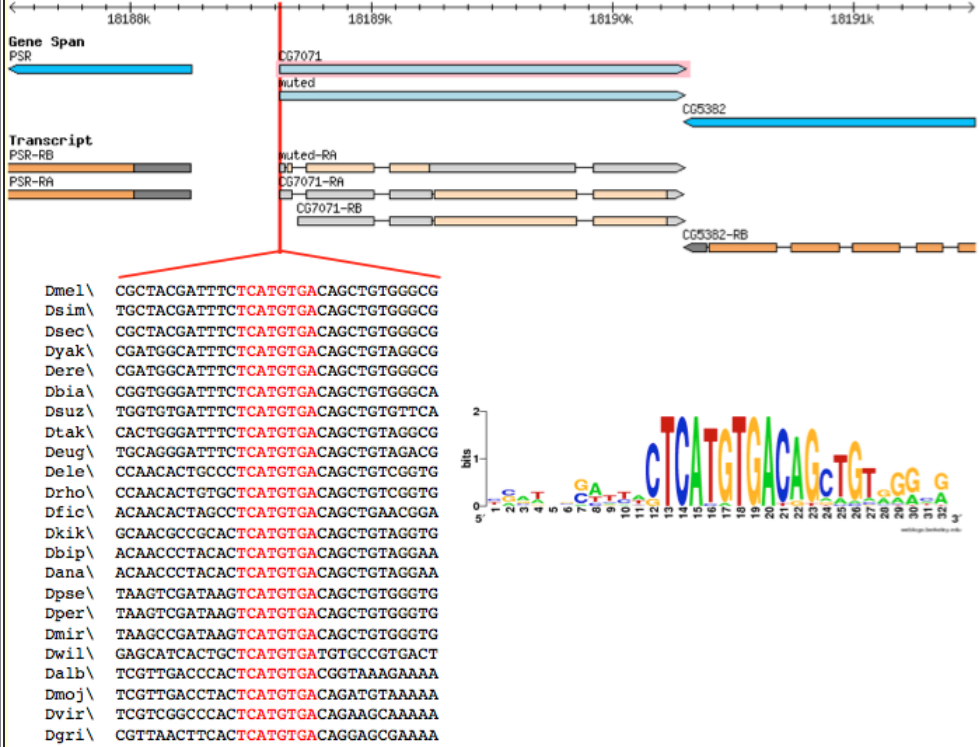

**muted/Tmem199 (CG7071) gene structure comparison:**

Key: UTR region, CDS region

| Species                        | CG7071<br>Tmem199<br>orthologs | muted (CG34131) |        |      |        |        | CG7071 |        |        |    | Extended CLEAR region | Position | bps<br>from<br>TSS             |        |   |
|--------------------------------|--------------------------------|-----------------|--------|------|--------|--------|--------|--------|--------|----|-----------------------|----------|--------------------------------|--------|---|
|                                |                                | 5'exon          | intron | exon | intron | exon3' | 5'exon | intron | exon3' |    |                       |          |                                |        |   |
| <i>Drosophila_melanogaster</i> | <a href="#">Dmel\CG7071</a>    | 28              | 22     | 60   | 281    | 66     | 171    | 5      | 598    | 69 | 311                   | 77       | cgtcagatttcTCATGTGAcagctgtggcg | 5'UTR  | 6 |
| <i>Drosophila_simulans</i>     | <a href="#">Dsim\GD20938</a>   |                 | 22     | 60   | 281    | 66     | 171    | 5      | 598    | 68 | 311                   |          | tgtcagatttcTCATGTGAcagctgtggcg | 5'UTR? |   |
| <i>Drosophila_sechellia</i>    | <a href="#">Dsec\GM26419</a>   |                 | 22     | 60   | 281    | 66     | 171    | 5      | 598    | 58 | 311                   |          | cgtcagatttcTCATGTGAcagctgtggcg | 5'UTR? |   |

|                                 |                              |    |     |     |    |     |    |     |    |     |  |                                  |        |  |
|---------------------------------|------------------------------|----|-----|-----|----|-----|----|-----|----|-----|--|----------------------------------|--------|--|
| <i>Drosophila_yakuba</i>        | <a href="#">Dyak\GE10288</a> | 22 | 60  | 281 | 66 | 171 | 5  | 604 | 60 | 323 |  | cgatggcatttcTCATGTGAcagctgtaggcg | 5'UTR? |  |
| <i>Drosophila_erecta</i>        | <a href="#">Dere\GG11121</a> | 22 | 60  | 287 | 66 | 171 | 5  | 568 | 61 | 320 |  | cgatggcatttcTCATGTGAcagctgtggcg  | 5'UTR? |  |
| <i>Drosophila_biarmipes</i>     | <a href="#">Dbia\CG7071</a>  | 22 | 63  | 272 | 69 | 171 | 5  | 601 | 60 | 323 |  | cggteggatttcTCATGTGAcagctgtggcca | 5'UTR? |  |
| <i>Drosophila_suzukii</i>       | <a href="#">Dsuz\CG7071</a>  | 22 | 65  | 272 | 69 | 171 | 5  | 598 | 60 | 323 |  | tggtgtgatttcTCATGTGAcagctgtgtca  | 5'UTR? |  |
| <i>Drosophila_takahashii</i>    | <a href="#">Dtak\CG7071</a>  | 22 | 63  | 272 | 66 | 171 | 5  | 583 | 60 | 326 |  | cactgggatttcTCATGTGAcagctgtaggcg | 5'UTR? |  |
| <i>Drosophila_eugracilis</i>    | <a href="#">Deug\CG7071</a>  | 22 | 60  | 272 | 64 | 171 | 5  | 592 | 60 | 323 |  | tgccaggatttcTCATGTGAcagctgtagacg | 5'UTR? |  |
| <i>Drosophila_elegans</i>       | <a href="#">Dele\CG7071</a>  | 22 | 59  | 272 | 64 | 171 | 5  | 589 | 63 | 323 |  | ccaacactgcccTCATGTGAcagctgtcgttg | 5'UTR? |  |
| <i>Drosophila_rhopaloea</i>     | <a href="#">Drho\CG7071</a>  | 22 | 61  | 272 | 65 | 171 | 4  | 592 | 68 | 323 |  | ccaacactgtgcTCATGTGAcagctgtcgttg | 5'UTR? |  |
| <i>Drosophila_ficusphila</i>    | <a href="#">Dfie\CG7071</a>  | 22 | 61  | 272 | 62 | 165 | 5  | 592 | 57 | 323 |  | acaacactagccTCATGTGAcagctgaacgga | 5'UTR? |  |
| <i>Drosophila_kikkawai</i>      | <a href="#">Dkik\CG7071</a>  | 22 | 61  | 272 | 65 | 171 | 8  | 604 | 68 | 317 |  | gcaacgccgcacTCATGTGAcagctgtaggtg | 5'UTR? |  |
| <i>Drosophila_bipectinata</i>   | <a href="#">Dbip\CG7071</a>  | 22 | 63  | 272 | 60 | 171 | 6  | 583 | 63 | 314 |  | acaacctacacTCATGTGAcagctgtaggaa  | 5'UTR? |  |
| <i>Drosophila_ananassae</i>     | <a href="#">Dana\GF18081</a> | 22 | 63  | 272 | 72 | 171 | 6  | 583 | 60 | 314 |  | acaacctacacTCATGTGAcagctgtaggaa  | 5'UTR? |  |
| <i>Drosophila_pseudoobscura</i> | <a href="#">Dpse\GA20078</a> | 22 | 61  | 272 | 72 | 171 | 13 | 625 | 63 | 317 |  | taatcgataagTCATGTGAcagctgtgggtg  | 5'UTR? |  |
| <i>Drosophila_persimilis</i>    | <a href="#">Dper\GL23377</a> | 22 | 61  | 272 | 72 | 171 | 13 | 625 | 63 | 317 |  | taatcgataagTCATGTGAcagctgtgggtg  | 5'UTR? |  |
| <i>Drosophila_miranda</i>       | <a href="#">Dmir\CG7071</a>  | 22 | 61  | 272 | 72 | 171 | 14 | 625 | 63 | 317 |  | taagccgataagTCATGTGAcagctgtgggtg | 5'UTR? |  |
| <i>Drosophila_willistoni</i>    | <a href="#">Dwil\GK12992</a> | 22 | 61  | 272 | 58 | 171 | 14 | 613 | 61 | 299 |  | gagcatcactgcTCATGTGAtgtgccgtgact | 5'UTR? |  |
| <i>Drosophila_albomicans</i>    | <a href="#">Dalb\CG7071</a>  | 22 | 177 | ND  | ND | 171 | 27 | 589 | 62 | 290 |  | tcgttgaccacTCACATGAcggtaaagaaaa  | 5'UTR? |  |
| <i>Drosophila_mojavensis</i>    | <a href="#">Dmoj\GI10478</a> | 22 | 60  | 272 | 59 | 171 | 13 | 586 | 73 | 290 |  | tcgttgactacTCATGTGAcagatgtaaaaa  | 5'UTR? |  |
| <i>Drosophila_virilis</i>       | <a href="#">Dvir\GJ23158</a> | 22 | 58  | 272 | 68 | 171 | 13 | 577 | 64 | 287 |  | tcgtgcgccacTCATGTGAcagaagcaaaaa  | 5'UTR? |  |
| <i>Drosophila_grimshawi</i>     | <a href="#">Dgrn\GH21152</a> | 22 | 62  | 272 | 69 | 171 | 23 | 589 | 54 | 287 |  | cgttaacttacTCATGTGAcaggagcagaaa  | 5'UTR? |  |
