# Supplementary material for: Structural and Comparative Analyses of Insects Suggest the Presence of an Ultra-Conserved Regulatory Element of the Genes Encoding Vacuolar-Type ATPase Subunits and Assembly Factors
Source: MDPI journal article supplement (doi:10.3390/biology12081127), 2023-08-13
Supplement: s1 [file s1]

| Gene Cluster ID              | Vma21                                                                |
|------------------------------|----------------------------------------------------------------------|
| Drosophila melanogaster gene | CG5969                                                               |
| FlyBase ID                   | <a href="#">FBgn0036998</a>                                          |
| Predicted function           | Vacuolar ATPase assembly integral membrane protein VMA21-like domain |
| Protein size                 | 105 amino acids                                                      |
| Cytogenetic map              | 3L:77C4-77C4                                                         |
| Gene sequence location       | 3L:20466897..20467891[+]                                             |
| Dmel CLEAR sequence          | TCATGTGA[+]                                                          |
| CLEAR sequence location      | 3L:20466879..20466886                                                |

FlyBase CG5969 gene model & CLEAR element (red) position:

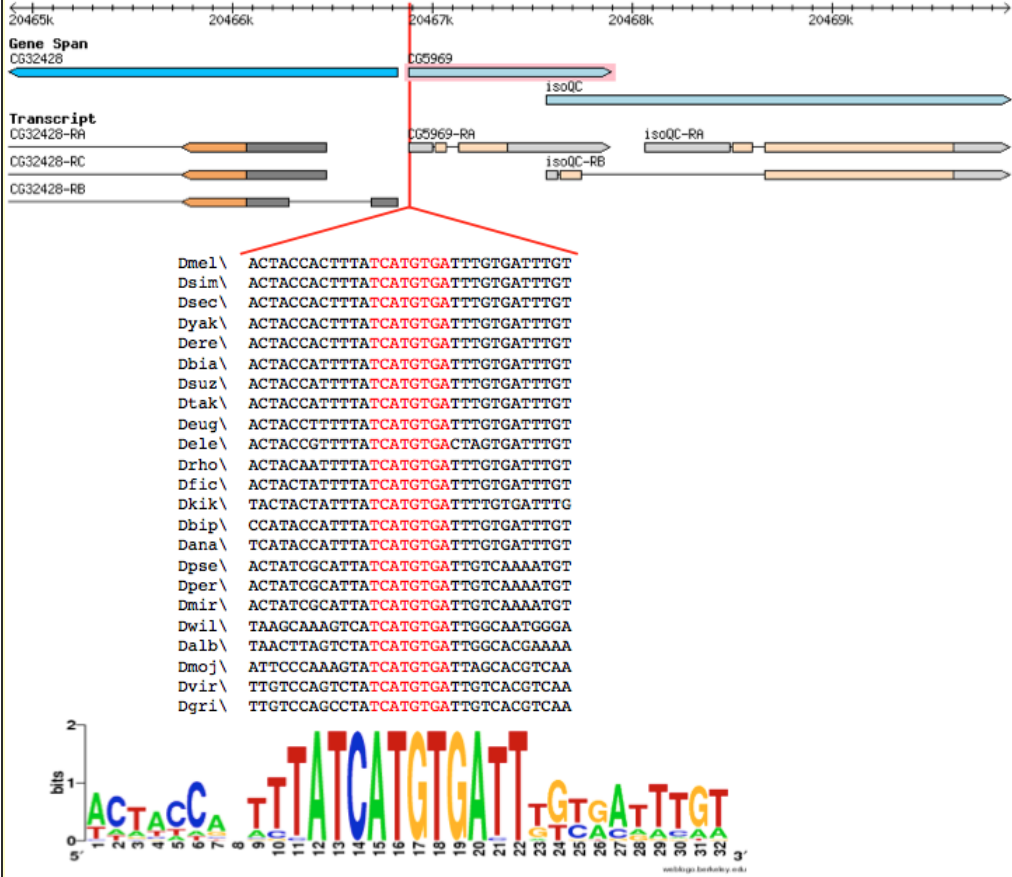

Vma21(CG5969) gene structure comparison in Drosophila species:

Key: UTR region, CDS region

| Species | Vma21 orthologs | 5'exon | intron | exon3' | Extended CLEAR region | Position | bps from TSS |
|---------|-----------------|--------|--------|--------|-----------------------|----------|--------------|
|---------|-----------------|--------|--------|--------|-----------------------|----------|--------------|

|                                 |                              |     |    |    |     |     |                                   |    |     |
|---------------------------------|------------------------------|-----|----|----|-----|-----|-----------------------------------|----|-----|
| <i>Drosophila_melanogaster</i>  | <a href="#">Dmel\CG5969</a>  | 101 | 72 | 62 | 246 | 517 | actaccactttaTCATGTGAttgtgatttgt   | 5' | -11 |
| <i>Drosophila_simulans</i>      | <a href="#">Dsim\GD14890</a> |     | 72 | 62 | 246 |     | actaccactttaTCATGTGAttgtgatttgt   | 5' |     |
| <i>Drosophila_sechellia</i>     | <a href="#">Dsec\GM22297</a> |     | 72 | 63 | 246 |     | actaccactttaTCATGTGAttgtgatttgt   | 5' |     |
| <i>Drosophila_yakuba</i>        | <a href="#">Dyak\GE19686</a> |     | 72 | 63 | 246 |     | actaccactttaTCATGTGAttgtgatttgt   | 5' |     |
| <i>Drosophila_erecta</i>        | <a href="#">Dere\GG16118</a> |     | 72 | 62 | 246 |     | actaccactttaTCATGTGAttgtgatttgt   | 5' |     |
| <i>Drosophila_biarmipes</i>     | <a href="#">Dbia\CG5969</a>  |     | 72 | 62 | 246 |     | actaccattttaTCATGTGAttgtgatttgt   | 5' |     |
| <i>Drosophila_suzukii</i>       | <a href="#">Dsuz\CG5969</a>  |     | 72 | 62 | 246 |     | actaccattttaTCATGTGAttgtgatttgt   | 5' |     |
| <i>Drosophila_takahashii</i>    | <a href="#">Dtak\CG5969</a>  |     | 72 | 63 | 246 |     | actaccattttaTCATGTGAttgtgatttgt   | 5' |     |
| <i>Drosophila_ficusphila</i>    | <a href="#">Dfic\CG5969</a>  |     | 72 | 63 | 246 |     | actactattttaTCATGTGAttgtgatttgt   | 5' |     |
| <i>Drosophila_eugracilis</i>    | <a href="#">Deug\CG5969</a>  |     | 69 | 65 | 246 |     | actaccattttaTCATGTGAttgtgatttgt   | 5' |     |
| <i>Drosophila_elegans</i>       | <a href="#">Dele\CG5969</a>  |     | 72 | 70 | 246 |     | actaccgttttaTCATGTGActagtatttgt   | 5' |     |
| <i>Drosophila_rhopaloo</i>      | <a href="#">Drho\CG5969</a>  |     | 72 | 62 | 246 |     | actacaattttaTCATGTGAttgtgatttgt   | 5' |     |
| <i>Drosophila_kikkawai</i>      | <a href="#">Dkik\CG5969</a>  |     | 81 | 63 | 246 |     | tactactattttaTCATGTGAttgtgatttg   | 5' |     |
| <i>Drosophila_bipectinata</i>   | <a href="#">Dbip\CG5969</a>  |     | 75 | 56 | 246 |     | ccataccattttaTCATGTGAttgtgatttgt  | 5' |     |
| <i>Drosophila_ananassae</i>     | <a href="#">Dana\GF10347</a> |     | 75 | 57 | 246 |     | tcataccattttaTCATGTGAttgtgatttgt  | 5' |     |
| <i>Drosophila_pseudoobscura</i> | <a href="#">Dpse\GA19267</a> |     | 81 | 63 | 246 |     | actatcgcatthaTCATGTGAttgtcaaaatgt | 5' |     |
| <i>Drosophila_persimilis</i>    | <a href="#">Dper\GL12791</a> |     | 81 | 63 | 246 |     | actatcgcatthaTCATGTGAttgtcaaaatgt | 5' |     |
| <i>Drosophila_miranda</i>       | <a href="#">Dmir\CG5969</a>  |     | 81 | 64 | 246 |     | actatcgcatthaTCATGTGAttgtcaaaatgt | 5' |     |
| <i>Drosophila_willistoni</i>    | <a href="#">Dwi\GK12294</a>  |     | 87 | 62 | 246 |     | taagcaaaagtcTCATGTGAttggcaatggga  | 5' |     |
| <i>Drosophila_albomicans</i>    | <a href="#">Dalb\CG5969</a>  |     | 72 | 90 | 252 |     | taacttagtctaTCATGTGAttggcacgaaaa  | 5' |     |
| <i>Drosophila_mojavensis</i>    | <a href="#">Dmoj\GH13399</a> |     | 78 | 65 | 240 |     | attcccaagtaTCATGTGAttgacacgtcaa   | 5' |     |
| <i>Drosophila_virilis</i>       | <a href="#">Dvir\GJ11524</a> |     | 78 | 65 | 246 |     | ttgtccagtctaTCATGTGAttgtcaegtcaa  | 5' |     |
| <i>Drosophila_grimshawi</i>     | <a href="#">Dgr\GH14552</a>  |     | 78 | 85 | 243 |     | ttgtccagectaTCATGTGAttgtcaegtcaa  | 5' |     |
