# Supplementary material for: Structural and Comparative Analyses of Insects Suggest the Presence of an Ultra-Conserved Regulatory Element of the Genes Encoding Vacuolar-Type ATPase Subunits and Assembly Factors
Source: MDPI journal article supplement (doi:10.3390/biology12081127), 2023-08-13
Supplement: s1 [file s1]

| Gene Cluster ID                     | Atp6v0c                                                                                                                                                                                                                                                                                                                                                                   |
|-------------------------------------|---------------------------------------------------------------------------------------------------------------------------------------------------------------------------------------------------------------------------------------------------------------------------------------------------------------------------------------------------------------------------|
| Drosophila melanogaster gene        | Vha16-1 (CG3161)                                                                                                                                                                                                                                                                                                                                                          |
| FlyBase ID                          | FBgn0262736                                                                                                                                                                                                                                                                                                                                                               |
| Predicted function                  | ATPase, H <sup>+</sup> transporting, lysosomal 16kDa, V0 subunit c                                                                                                                                                                                                                                                                                                        |
| Atp6v0c CLEAR element conservation: |                                                                                                                                                                                                                                                                                                                                                                           |
| Ccap\                               | <div>5'</div> <div>TGCTTCACGTGAGCTG</div> <div>5'</div> <div>ATTTTCATATGAATCT</div> <div>5'</div> <div>TTGGTCATATGACCAA</div> <div>intron</div> <div>CCAGTCACATGAGTAA</div> <div>intron</div> <div>CGTGTACACGTGACATT</div> <div>intron</div> <div>GAAATCACATGACTGT</div> <div>intron</div> <div>CTTGTTCATGTGATTAA</div>                                                   |
| Mdom\                               | <div>5'/5'UTR</div> <div>TAAATCATATGACTTT</div> <div>intron</div> <div>AGTTTCATGTGAAGCTC</div> <div>intron</div> <div>TTAAATCATGTGACTGA</div> <div>intron</div> <div>AGTATCATGTGACCAG</div>                                                                                                                                                                               |
| Gmor\                               | <div>5'/5'UTR</div> <div>-----</div> <div>intron</div> <div>TAAGTCATATGACCAA</div> <div>intron</div> <div>-----</div> <div>intron</div> <div>-----</div>                                                                                                                                                                                                                  |
| Llon\                               | <div>5'/5'UTR</div> <div>GTTGGTCATGTGACGAA</div> <div>intron</div> <div>TCTGTTCATATGACTTC</div> <div>intron</div> <div>CGAATTCATGTGACTCC</div> <div>intron</div> <div>GAATTTCATGTGATTTT</div>                                                                                                                                                                             |
| Ppap\                               | <div>5'/5'UTR</div> <div>ATGGTCATGTGACAGC</div> <div>intron</div> <div>TCTGTTCATATGACCTT</div> <div>intron</div> <div>GCAATTCATGTGACTCC</div> <div>intron</div> <div>AAATTTCATGTGATTTT</div>                                                                                                                                                                              |
| Agam\                               | <div>5'/5'UTR</div> <div>CTGGTCATATGATGAT</div> <div>intron</div> <div>CGTGTTCATGTGAGCCC</div> <div>intron</div> <div>GCTGTTCACATGATCGA</div> <div>intron</div> <div>TGTGTTCATATGACCGA</div> <div>intron</div> <div>TTGATTCATGTGACGG</div> <div>intron</div> <div>ATCTTCACGTGATCGC</div> <div>intron</div> <div>GTCGTTCATGTGACCGC</div>                                   |
| Aara\                               | <div>5'/5'UTR</div> <div>CTGGTCATATGATGGT</div> <div>intron</div> <div>CGTGTTCATGTGAGCCC</div> <div>intron</div> <div>GCTGTTCACATGATCGA</div> <div>intron</div> <div>CGTGTTCATATGACCGA</div> <div>intron</div> <div>TTGATTCATGTGACGG</div> <div>intron</div> <div>ATCTTCACGTGATCGC</div> <div>intron</div> <div>GTCGTTCATGTGACCGC</div>                                   |
| Aqan\                               | <div>5'/5'UTR</div> <div>CTGGTCATATGATGGT</div> <div>intron</div> <div>CGTGTTCATGTGAGCCC</div> <div>intron</div> <div>GCTGTTCACATGATCGA</div> <div>intron</div> <div>TGTGTTCATATGACCGA</div> <div>intron</div> <div>TTGATTCATGTGACGG</div> <div>intron</div> <div>ATCTTCACGTGATCGC</div> <div>intron</div> <div>GTCGTTCATGTGACCGC</div>                                   |
| Achr\                               | <div>5'/5'UTR</div> <div>CAGGTTCATATGACGGT</div> <div>intron</div> <div>CGTGTTCATGTGAGCCC</div> <div>intron</div> <div>GCTGTTCACATGATCGA</div> <div>intron</div> <div>GGAGTCATATGACCGC</div> <div>intron</div> <div>ATGATTCATGTGACGC</div> <div>intron</div> <div>ATCTTCACGTGATCGC</div> <div>intron</div> <div>GTCGTTCATGTGACCGC</div>                                   |
| Aepi\                               | <div>5'/5'UTR</div> <div>CAGGTTCATATGATGGC</div> <div>intron</div> <div>CGTGTTCATGTGAGCCC</div> <div>intron</div> <div>GCTGTTCACATGATCGG</div> <div>intron</div> <div>GGAGTCATATGACCGC</div> <div>intron</div> <div>TTGATTCATGTGAGAAC</div> <div>intron</div> <div>ATCTTCACGTGATCGC</div> <div>intron</div> <div>GTCGTTCATGTGACTAC</div>                                  |
| Amin\                               | <div>5'/5'UTR</div> <div>CAGGTTCATATGATGCC</div> <div>intron</div> <div>CGTGTTCATGTGAGCCC</div> <div>intron</div> <div>TCTGTTCACATGATCGG</div> <div>intron</div> <div>GGAGTCATATGACCGA</div> <div>intron</div> <div>ATGATTCATGTGACGC</div> <div>intron</div> <div>ATCTTCACGTGATCGT</div> <div>intron</div> <div>GTCGTTCATGTGACCCC</div>                                   |
| Afun\                               | <div>5'/5'UTR</div> <div>CAGGTTCATATGATGGT</div> <div>intron</div> <div>CGTGTTCATGTGAGCCC</div> <div>intron</div> <div>TCTGTTCACATGATCGG</div> <div>intron</div> <div>TCAGTCATATGACCGA</div> <div>intron</div> <div>ATGATTCATGTGACGC</div> <div>intron</div> <div>ATCTTCACGTGATCGC</div> <div>intron</div> <div>GTCGTTCATGTGACCCC</div>                                   |
| Aste\                               | <div>5'/5'UTR</div> <div>CAGGTTCATATGATGGT</div> <div>intron</div> <div>CGTGTTCATGTGAGCCC</div> <div>intron</div> <div>TCTGTTCACATGATCGG</div> <div>intron</div> <div>GAAGTCATATGACCGA</div> <div>intron</div> <div>ATGATTCATGTGACGC</div> <div>intron</div> <div>ATCTTCACGTGATCGC</div> <div>intron</div> <div>GTCGTTCATGTGACCCC</div>                                   |
| Adir\                               | <div>5'/5'UTR</div> <div>CAGGTTCATATGATAGC</div> <div>intron</div> <div>GGTGTTCATGTGAGCCC</div> <div>intron</div> <div>TCTGTTCACATGATCGA</div> <div>intron</div> <div>ACCATTCATCTGACCAC</div> <div>intron</div> <div>GTGATTCATGTGACGC</div> <div>intron</div> <div>ATCTTCACGTGATCGG</div> <div>intron</div> <div>GTCGTTCATGTGACCTG</div>                                  |
| Anil\                               | <div>5'/5'UTR</div> <div>CAGGTTCATATGATGGT</div> <div>intron</div> <div>ACTGTTCATGTGAGCGC</div> <div>intron</div> <div>TCTGTTCACATGACCCA</div> <div>intron</div> <div>AAAAATCATATGACCGA</div> <div>intron</div> <div>GATATTCATGTGACGAG</div> <div>intron</div> <div>ATCTTCACGTGATCGC</div> <div>intron</div> <div>GCCATTCATGTGACCCCT</div>                                |
| Aalb\                               | <div>5'/5'UTR</div> <div>CTGGTCATATGACGCT</div> <div>intron</div> <div>ATCGTTCATGTGACGCC</div> <div>intron</div> <div>TGGGTTCACATGATGAT</div> <div>intron</div> <div>ATCCTTCACGTGAGGTC</div> <div>intron</div> <div>GTGATTCATGTGACGC</div> <div>intron</div> <div>ATCTTCACGTGATACT</div> <div>intron</div> <div>ACCGTTCATGTGACACA</div>                                   |
| Adar\                               | <div>5'/5'UTR</div> <div>-----</div> <div>intron</div> <div>ATCGTTCATGTGAGCGC</div> <div>intron</div> <div>TGGGTTCACATGATGAT</div> <div>intron</div> <div>-----</div> <div>intron</div> <div>GTGATTCATGTGACGC</div> <div>intron</div> <div>ATCTTCACGTGATACT</div> <div>intron</div> <div>ATCATTCATGTGACACA</div>                                                          |
| Aaeg\                               | <div>5'/5'UTR</div> <div>ACAGTCATGTGATTAC</div> <div>intron</div> <div>-----</div> <div>intron</div> <div>CGAATTCATGTGACGTC</div> <div>intron</div> <div>GTGTTCATGTGACATA</div> <div>intron</div> <div>GCTTTTCACATGACAA</div> <div>intron</div> <div>AGAGTCATGTGAGCGT</div> <div>intron</div> <div>-----</div>                                                            |
| Cqui\                               | <div>5'/5'UTR</div> <div>CAAGTCATGTGACAG</div> <div>intron</div> <div>AACGTTCATATGATCAC</div> <div>intron</div> <div>TCAGTCATGTGACGTC</div> <div>intron</div> <div>AAATTCACATGAGACA</div> <div>intron</div> <div>CAAGTCATATGACTTG</div> <div>intron</div> <div>CTGGTCATGTGAGAGT</div> <div>intron</div> <div>CAAGTCATGTGATACG</div>                                       |
| Mdes\                               | <div>5'/5'UTR</div> <div>TGTGTTCATATGACCAT</div> <div>intron</div> <div>ACAAATCATATGAATGA</div> <div>intron</div> <div>AACGTTCACATGATTA</div> <div>intron</div> <div>ATGCTTCATGTGATTGA</div> <div>intron</div> <div>-----</div> <div>intron</div> <div>AGATTCATGTGATCAT</div> <div>intron</div> <div>ATATTCACGTGAGATA</div> <div>intron</div> <div>TCTGTTCATGTGAAGA</div> |
| Bmor\                               | <div>5'/5'UTR</div> <div>CAACATCTCTCGTCATATGACCCATTCTGTG</div> <div>intron</div> <div>ATTGTTCATGTGATAGA</div> <div>intron</div> <div>ATTGTTCACATGA-CAT-TACT--TGTAATCATGTGACTTG</div> <div>intron</div> <div>ataaTCATGTGAttct</div> <div>intron</div> <div>caagTCACATGAttgt</div> <div>intron</div> <div>-----</div>                                                       |
| Msex\                               | <div>5'/5'UTR</div> <div>GAACATCAATCGTCATATGACCCATTCTATCG</div> <div>intron</div> <div>GGAGTCATGTGATTGA</div> <div>intron</div> <div>TTAGTCACATGA-CAG-TACA----ATCATGTGACCAA</div> <div>intron</div> <div>taggTCACATGAtttt</div> <div>intron</div> <div>gctgTCACATGAcAAA</div> <div>intron</div> <div>tacaTCACATGAttt</div>                                                |
| Hmel\                               | <div>5'/5'UTR</div> <div>GAACATCAATCGTCATATGACCCATTCTACCG</div> <div>intron</div> <div>TCAATCATGTGATTGA</div> <div>intron</div> <div>AAAAATCATGTGA-CT--TCAC--TTAATTCATGTGATGAA</div> <div>intron</div> <div>-----</div> <div>intron</div> <div>-----</div>                                                                                                                |
| Dple\                               | <div>5'/5'UTR</div> <div>GAACATCAATCGTCATATGACCCATTCTATTG</div> <div>intron</div> <div>GATATTCATGTGATTGA</div> <div>intron</div> <div>ATCAATCATATGA-CTGATAAT--TTGGTCATGTGATTAA</div>                                                                                                                                                                                      |

Sinv\

GCTCGTCACTCA

TCACATGA

CCCGCGCCACTG

CTTGTGCGATTG

TCATGTGA

CTGC-----CAACGTGAGAA

TCATGTGACTGCAATT

TCCA

Cflo\

GCTCGTCACTCA

TCACATGA

CCCGCGCCACCG

GGGACTTGATTG

TCATGTGA

CTGC-----CAACGTGAGAA

TCATGTGACTGCGACT

TCCA

Pbar\

ACTCGTCACTCA

TCACATGA

CCCGCGCCACTG

CTTGTACGATTG

TCATGTGACTGC-----CAACGTGAGAA

TCATGTGACTGCGATT

TACCA

Lhum\

GCTCGTCACTCA

TCACATGA

CCCGCGCCACAG

CTTGACGATTG

TCATGTGA

CTGC-----CAACGTGAGAA

TCATGTGACTGTAATT

TCCA

Hsal\

GCTCGTCACTCA

TCACATGA

CCCGTGCCCGTG

CTTGACGATTG

TCATGTGA

CTGC-----CAACGTGAGAA

TCATGTGACTGCGATC

TCCA

Ngir\

CAGCTCGGCTCG

TCACATGA

CCGCGCGCAGCC

TACATGCGATTG

TCATGTGACTCGTGAGCG

CAACGTGAGAGTCATGTGACTGGCTGT

GGGG

Nlon\

CAGCTCGGCTCG

TCACATGA

CCGCGCGCAGCC

TACATGCGATTG

TCATGTGACTCGTGAGCG

CAACGTGAGAGTCATGTGACTGGCTGT

GGGG

Nvit\

CAGCTCGGCTCG

TCACATGA

CCGCGCGCAGCC

TACATGCGATTG

TCATGTGACTCGAGAGCG

CAACGTGAGAGTCATGTGACTGGCTGT

GGGG

Lful\

AATCTTCTCACA

TCACATGA

CCCTCTCTCACA

Rpro\

gctaaccctcaa

TCACATGA

tcatatctacct

Phum\

aatttcgattca

TCACATGA

ccctctgtact

Dpul\

agggtccttcgg

TCACGTGA

accacgagtcacg

Isca\

aaaacgctccca

TCACGTGA

tataaaaataaa

cgggtcgtgcaa

TCATGTGA

ctgagattccgc

aatggggtgttt

TCACATGA

cgtcgatctgcc

### Atpv0c gene structure comparisons:

(Click on orthologs for genomic, mRNA and protein sequence informations)

Key: UTR region, CDS region

| Order                   | Species                          | Atp6v0c orthologs                       | 5' exon | intron | exon  | intron | exon | intron | exon3'  | Extended CLEAR region                              | Position         | bps from TSS |
|-------------------------|----------------------------------|-----------------------------------------|---------|--------|-------|--------|------|--------|---------|----------------------------------------------------|------------------|--------------|
| Diptera (Drosophilidae) | <i>Drosophila_melanogaster</i>   | <a href="#">Dmel\Vha16-1</a>            | 134     |        | 2985  | 4105   | 190  | 57     | 2052228 | ttagatttctaaTCACGTGAgtgaaaagcag (8 CLEAR elements) | exon/int intron1 | 130          |
| Diptera (Muscidae)      | <i>Musca_domestica</i>           | <a href="#">Mdom\Atp6v0c</a>            |         |        | 76    | 2950   | 190  | 102    | 205     | atatgacttaaTCATATGActtgactgcaa (4 CLEAR elements)  | 5' intron1       | >-1056       |
| Diptera ( Tephritidae)  | <i>Ceratitis_capitata</i>        | <a href="#">Ccap\Atp6v0c</a>            | 99      | 1115   | 4382  | 6761   | 190  | 125    | 205278  | tacaacctgctTCACGTGAgtgtcaataaa (7 CLEAR elements)  | 5' intron        | -681         |
| Diptera (Glossinidae)   | <i>Glossina_morsitans</i>        | <a href="#">Gmor\Atp6v0c</a>            | 94      | 750    | 12482 | 1722   | 190  | 68     | 205180  | aacttttgaagTCATATGAccaaatgaaaaa                    | 5'               | -168         |
| Diptera (Psychodidae)   | <i>Lutzomyia_longipalpis</i>     | <a href="#">Llon\Atp6v0c</a>            |         |        | 79    | 8538   | 190  | 88     | 205180  | ctgtttttctgTCATATGActtgtaaaatt (7 CLEAR elements)  | 5'               | >-289        |
|                         | <i>Phlebotomus_papatasi</i>      | <a href="#">Ppap\Atp6v0c</a>            |         |        | 79    | 5505?  | 190  | ND     | 205     | ctgagctttctgTCATATGAccctgtccaag (5 CLEAR elements) | 5'               | >-296        |
| Diptera (Culicidae)     | <i>Anopheles_gambiae</i>         | <a href="#">Agam\atp6v0c AGAP028154</a> |         |        | 19579 | 4335   | 190  | 1143   | 205470  | accgttcgctggTCATATGAtgataaccgcta (7 CLEAR elemnts) | 5' intron1       | 1080         |
|                         | <i>Anopheles_arabiensis</i>      | <a href="#">Aara\Atp6v0c</a>            |         |        | 79    | 4377   | 190  | 1167   | 205     | accgttcgctggTCATATGAtgtaaccgcta (7 CLEAR elemnts)  | 5' intron1       | >-1273       |
|                         | <i>Anopheles_quadriannulatus</i> | <a href="#">Aqan\Atp6v0c</a>            |         |        | 79    | 4346   | 190  | 1144   | 205     | accgttcgctggTCATATGAtgtaaccgcta (7 CLEAR elemnts)  | 5' intron1       | >-1272       |
|                         | <i>Anopheles_christyi</i>        | <a href="#">Achr\Atp6v0c</a>            |         |        | 79    | 3957?  | 190  | >483   | 205     | acaatttcaggTCATATGAcggtagccgcta (7 CLEAR elemnts)  | 5' intron1       | >-1127       |
|                         | <i>Anopheles_epirocticus</i>     | <a href="#">Aepi\Atp6v0c</a>            |         |        | 79    | 3936   | 190  | 740    | 205     | caaacacgaggTCATATGAtggccagcaaac (7 CLEAR elemnts)  | 5' intron1       | >-1267       |
|                         | <i>Anopheles_minimus</i>         | <a href="#">Amin\Atp6v0c</a>            |         |        | 79    | 3587   | 190  | 572    | 205     | acaatttcaggTCATATGAtgccaagctaa (8 CLEAR elemnts)   | 5' intron1       | >-1052       |
|                         | <i>Anopheles_funestus</i>        | <a href="#">Afun\Atp6v0c</a>            |         |        | 79    | 3832   | 190  | 575    | 205     | acaatttcaggTCATATGAtgtaaaagctaa (7 CLEAR elemnts)  | 5' intron1       | >-1114       |

|                            |                                |                                                            |  |  |  |     |      |       |      |      |     |                                                        |                                                        |               |             |
|----------------------------|--------------------------------|------------------------------------------------------------|--|--|--|-----|------|-------|------|------|-----|--------------------------------------------------------|--------------------------------------------------------|---------------|-------------|
|                            | <i>Anopheles_stephensi</i>     | <a href="#">Aste\Atp6v0c</a>                               |  |  |  | 79  | 3944 | 190   | 673  | 205  |     | gcgatacgcaggTCATATGAtggtgaggctag<br>(9 CLEAR elemnts)  | 5'<br>intron1                                          | >-1269        |             |
|                            | <i>Anopheles_dirus</i>         | <a href="#">Adir\Atp6v0c</a>                               |  |  |  | 79  | 4584 | 190   | 901  | 205  |     | gtgctgagcaggTCATGTGAtagcggtgcaaa<br>(6 CLEAR elemnts)  | 5'<br>intron1                                          | >-1081        |             |
|                            | <i>Anopheles_nili</i>          | <a href="#">Anil\Atp6v0c</a>                               |  |  |  | 79  | 3459 | 190   | 843  | 205  |     | tcggtacgcaggTCATATGAtggtaaagctaa<br>(7 CLEAR elemnts)  | 5'<br>intron1                                          | >-1422        |             |
|                            | <i>Anopheles_albimanus</i>     | <a href="#">Aalb\Atp6v0c</a>                               |  |  |  | 79  | 3308 | 190   | 444  | 205  |     | ggacaggggctggTCATATGAcgtagctactg<br>(7 CLEAR elemnts)  | intron1                                                | >-956         |             |
|                            | <i>Anopheles_darlingi</i>      | <a href="#">Adar\Atp6v0c</a>                               |  |  |  | 79  | 3187 | 190   | 480  | 205  | 421 | aaatcgTCATGTGAaatcgTCATGTGAgcgcaa<br>(7 CLEAR elemnts) | intron1                                                | >-270         |             |
|                            | <i>Aedes_aegypti</i>           | <a href="#">Aaeg\Atp6v0c</a><br><a href="#">AAEL000291</a> |  |  |  | 176 | 79   | 14503 | 7422 | 205  | 421 | tttgccagacagTCATGTGAttacattcgtgt<br>(5 CLEAR elements) | 5'                                                     | -260          |             |
|                            | <i>Culex_pipiens_qui.</i>      | <a href="#">Cqui\Atp6v0c</a><br><a href="#">CPIJ011018</a> |  |  |  | 139 | 79   | 9830  | 190  | 3506 | 205 | 100                                                    | ccacacgcaagTCATGTGAaccgaactcgtg<br>(7 CLEAR elemnts)   | 5'<br>intron1 | -164<br>370 |
|                            |                                |                                                            |  |  |  |     |      |       |      |      |     |                                                        |                                                        |               |             |
| Diptera<br>(Cecidomyiidae) | <i>Mayetiola_destructor</i>    | <a href="#">Mdes\Atp6v0c</a>                               |  |  |  | 88  | 4932 | 190   | 79   | 205  |     | catagccgtgtgTCATATGAaccattttatac<br>(7 CLEAR elements) | 5'<br>intron1                                          | >-471         |             |
| Lepidoptera                | <i>Bombyx_mori</i>             | <a href="#">Bmor\Atp6v0c</a>                               |  |  |  | 73  | 1501 | 190   | 1221 | 205  | 275 | caacattcttgTCATATGAaccattctgttg<br>(4 CLEAR elements)  | 5'<br>intron1                                          | >-130         |             |
|                            | <i>Manduca sexta</i>           | <a href="#">Msex\Atp6v0c</a>                               |  |  |  | 70  | 2514 | 187   | 1163 | 208  |     | gaacatcaatcgTCATATGAaccattctatcg<br>(6 CLEAR elements) | 5'<br>intron1                                          | >-129         |             |
|                            | <i>Danaus_plexippus</i>        | <a href="#">Dple\Atp6v0c</a>                               |  |  |  | 73  | 1511 | 190   | 221  | 211  |     | gaacatcaatcgTCATATGAaccattctattg<br>(5 CLEAR elements) | 5'<br>intron1                                          | >-130         |             |
|                            | <i>Heliconius_melpomene</i>    | <a href="#">Hmel\Atp6v0c</a>                               |  |  |  | 73  | 1931 | 190   | 991  | 211  |     | gaacatcaatcgTCATATGAaccattctaccg<br>(7 CLEAR elements) | 5'<br>intron1                                          | >-135         |             |
|                            | <i>Plutella_xylostella</i>     | <a href="#">Pxy\Atp6v0c</a>                                |  |  |  | 66  | 73   | 1933  | 779  | 208  | 255 | gaacatcaatcgTCATATGAaccattctaccg<br>(5 CLEAR elements) | 5'<br>intron1                                          | >-135         |             |
|                            |                                |                                                            |  |  |  |     |      |       |      |      |     |                                                        |                                                        |               |             |
| Strepsiptera               | <i>Mengenilla_moldrzyki</i>    | <a href="#">Mmol\Atp6v0c</a>                               |  |  |  | 477 |      |       |      |      |     | ND                                                     |                                                        |               |             |
| Coleoptera                 | <i>Tribolium_castaneum</i>     | <a href="#">Tcas\Atp6v0c</a><br><a href="#">LOC656327</a>  |  |  |  | 99  | 82   | 2459  | 193  | ND   | 205 | 273                                                    | aatttctaategTCATATGAaccattctgct<br>(8 CLEAR elements)  | 5'            | -16         |
|                            | <i>Dendroctonus_ponderosae</i> | <a href="#">Dpon\Atp6v0c</a>                               |  |  |  | 120 | 85   | ND    | 193  | 678  | 208 | 217                                                    | attttctatcgTCATATGAaccattctgct<br>(7 CLEAR elements)   | 5'            | -4          |
|                            |                                |                                                            |  |  |  |     |      |       |      |      |     |                                                        |                                                        |               |             |
| Hymenoptera                | <i>Apis_mellifera</i>          | <a href="#">Ame\Atp6v0c</a><br><a href="#">GB19405</a>     |  |  |  | 58  | 76   | 1840  | 190  | 556  | 205 | 53                                                     | actcgtcaactgTCACATGAaccgcactcctg<br>(3 CLEAR elements) | 5'<br>intron1 | -91         |
|                            | <i>Apis_florea</i>             | <a href="#">Aflo\Atp6v0c</a>                               |  |  |  |     | 76   | 1810  | 190  | 588  | 205 |                                                        | actcgtcaactgTCACATGAaccgcactcctg<br>(3 CLEAR elements) | 5'<br>intron1 | >-149       |
|                            | <i>Bombus_terrestris</i>       | <a href="#">Bter\Atp6v0c</a>                               |  |  |  |     | 85   | 2086  | 190  | 539  | 205 |                                                        | actcgtcaactgTCACATGAaccgcactcctg<br>(3 CLEAR elements) | 5'<br>intron1 | >-150       |
|                            | <i>Bombus_impatiens</i>        | <a href="#">Bimp\Atp6v0c</a>                               |  |  |  |     | 85   | 2091  | 190  | 538  | 205 |                                                        | actcgtcaactgTCACATGAaccgcactcctg<br>(3 CLEAR elements) | 5'<br>intron1 | >-150       |
|                            | <i>Megachile_rotundata</i>     | <a href="#">Mrot\Atp6v0c</a>                               |  |  |  |     | 76   | 2472  | 190  | 787  | 205 |                                                        | ggcctgcaactgTCACATGAaccgcactcctg<br>(3 CLEAR elements) | 5'<br>intron1 | >-150       |
|                            | <i>Acromyrmex_echinatior</i>   | <a href="#">Aech\Atp6a0c</a>                               |  |  |  |     | 79   | 3543  | 190  | 186  | 205 |                                                        | gctcgtcaactcaTCACATGAaccgcgcactg<br>(3 CLEAR elements) | 5'<br>intron1 | >-180       |
|                            | <i>Atta_cephalotes</i>         | <a href="#">Acep\Atp6v0c</a>                               |  |  |  |     | 76   | 3488  | 190  | 182  | 205 |                                                        | gctcgtcaactcaTCACATGAaccgcgcactg<br>(3 CLEAR elements) | 5'<br>intron1 | >-182       |

|              |                               |                                               |  |  |     |     |      |     |      |     |      |                                                        |               |       |
|--------------|-------------------------------|-----------------------------------------------|--|--|-----|-----|------|-----|------|-----|------|--------------------------------------------------------|---------------|-------|
|              | <i>Solenopsis_invicta</i>     | <a href="#">Sinv\Atp6v0c</a>                  |  |  |     | 79  | 3010 | 190 | 191  | 205 |      | gctcgtcactcaTCACATGAccecgccactg<br>(3 CLEAR elements)  | 5'<br>intron1 | >-177 |
|              | <i>Pogonomyrmex_barbatus</i>  | <a href="#">Pbar\Atp6v0c</a>                  |  |  |     | 76  | 2937 | 187 | 256  | 208 |      | actcgtcactcaTCACATGAccecgccactg<br>(3 CLEAR elements)  | 5'<br>intron1 | >-173 |
|              | <i>Camponotus_floridanus</i>  | <a href="#">Cflo\Atp6v0c</a>                  |  |  |     | 82  | 2659 | 190 | 224  | 205 |      | gctcgtcactcaTCACATGAccecgccaccg<br>(3 CLEAR elements)  | 5'<br>intron1 | >-176 |
|              | <i>Linepithema_humile</i>     | <a href="#">Lhum\Atp6v0c</a>                  |  |  |     | 79  | 2561 | 190 | 166  | 205 |      | gctcgtcactcaTCACATGAccecgccacag<br>(3 CLEAR elements)  | 5'<br>intron1 | >-173 |
|              | <i>Harpegnathos_saltator</i>  | <a href="#">Hsal\Atp6v0c</a>                  |  |  |     | 82  | 2639 | 187 | 446  | 205 |      | gctcgtcactcaTCACATGAccegtgccctg<br>(3 CLEAR elements)  | 5'<br>intron1 | >-174 |
|              | <i>Nasonia_vitripennis</i>    | <a href="#">Nvit\Atp6v0c</a>                  |  |  | 254 | 88  | 2051 | 190 | 88   | 211 | 447  | cagctcggctcgTCACATGAccecgccagcc<br>(3 CLEAR elements)  | 5'<br>intron1 | -64   |
|              | <i>Nasonia_giraulti</i>       | <a href="#">Ngir\Atp6v0c</a>                  |  |  |     | 88  | ND   | 190 | 88   | 211 |      | cagctcggctcgTCACATGAccecgccagcc<br>(3 CLEAR elements)  | 5'<br>intron1 | >-334 |
|              | <i>Nasonia_longicornis</i>    | <a href="#">Nlon\Atp6v0c</a>                  |  |  |     | 88  | ND   | 190 | 88   | 211 |      | cagctcggctcgTCACATGAccecgccagcc<br>(3 CLEAR elements)  | 5'<br>intron1 | >-331 |
|              |                               |                                               |  |  |     |     |      |     |      |     |      |                                                        |               |       |
| Hemiptera    | <i>Acyrtosiphon_pisum</i>     | <a href="#">Apis\Atp6v0c</a>                  |  |  | 376 | 82  | 2440 | 190 | 109  | 205 |      | ND                                                     |               |       |
|              | <i>Rhodnius_prolixus</i>      | <a href="#">Rpro\Atp6a0c</a>                  |  |  |     | 79  | 2505 | 190 | 1608 | 205 |      | getaaccctcaaTCACATGAtcatatcact                         | 5'            | >-152 |
| Phthiraptera | <i>Pediculus_humanus</i>      | <a href="#">Phum\Atp6a0c</a>                  |  |  |     | ND  | ND   | 184 | 105  | 205 |      | aatttcgattcaTCACATGAcctctgctact                        | 5'            | >-139 |
| Odonata      | <i>Ladona_fulva</i>           | <a href="#">Lful\Atp6v0c</a>                  |  |  |     | 82  | 372  | 190 | 1279 | 205 |      | aatctctcacaTCACATGAcctctctcaca                         | 5'            | >-116 |
| Crustacea    | <i>Daphnia_pulex</i>          | <a href="#">Dpu\Atp6a0c</a>                   |  |  | 72  | 91  | 332  | 190 | 59   | 205 | 181  | agggtccttcggTCACGTGAcccaggtcacg                        | 5'            | -79   |
| Ixodida      | <i>Ixodes_scapularis</i>      | <a href="#">Isca\Atp6v0c-1<br/>ISCW018346</a> |  |  | 152 | 76  | 2174 | 184 | 1782 | 208 | 1126 | aaaacgtccccaTCACGTGAtataaaaaataa<br>(3 CLEAR elements) | 5'<br>intron1 | -26   |
|              |                               | <a href="#">Isca\Atp6v0c-2<br/>ISCW012283</a> |  |  |     | 471 |      |     |      |     |      | ND                                                     |               |       |
|              |                               |                                               |  |  |     |     |      |     |      |     |      |                                                        |               |       |
|              | <i>Homo_sapiens</i>           | <a href="#">ATP6V0C</a>                       |  |  | 234 | 79  | 5035 | 184 | 139  | 205 | 478  | gcggggccccaggTCATGTGAcggcgccgcggc                      | 5'UTR         | 53    |
| Cnidaria     | <i>Nematostella_vectensis</i> | <a href="#">v1g162114</a>                     |  |  | 92  | 76  | 74   | 159 | 1262 | 25  | 612  | 211                                                    | 826           | ND    |
| Placozoa     | <i>Trichoplax_adhaerens</i>   | <a href="#">Tadh\Atp6v0c</a>                  |  |  | 98  | 79  | 211  | 159 | 141  | 28  | 904  | 211                                                    | 47            | ND    |
|              |                               |                                               |  |  |     |     |      |     |      |     |      |                                                        |               |       |
