# Supplementary material for: Structural and Comparative Analyses of Insects Suggest the Presence of an Ultra-Conserved Regulatory Element of the Genes Encoding Vacuolar-Type ATPase Subunits and Assembly Factors
Source: MDPI journal article supplement (doi:10.3390/biology12081127), 2023-08-13
Supplement: s1 [file s1]

| Gene Cluster ID                                                       | Atp6v1D                                                 |
|-----------------------------------------------------------------------|---------------------------------------------------------|
| <b>Drosophila melanogaster gene</b>                                   | <b>Vha36-1 (CG8186)</b>                                 |
| FlyBase ID                                                            | <a href="#">FBgn0022097</a>                             |
| <b>Predicted function</b>                                             | <b>ATPase, H<sup>+</sup> transporting, V1 subunit D</b> |
| Protein size                                                          | 246 amino acids                                         |
| Cytogenetic map                                                       | <a href="#">2R:52A10-52A10</a>                          |
| Gene sequence location                                                | <a href="#">2R:11428922..11430003</a> [+]               |
| <b>Dmel CLEAR sequence</b>                                            | <b>TCATCTGA; TCATATGA</b>                               |
| CLEAR sequence location                                               | 2R:11430063..11430070; 2R:11430114..11430121            |
| Drosophila ATP6v1D paralogs                                           | <a href="#">Vha36-2</a> ; <a href="#">Vha36-3</a>       |
| <b>FlyBase Vha36-1 gene model &amp; CLEAR element (red) position:</b> |                                                         |
|                                                                       |                                                         |

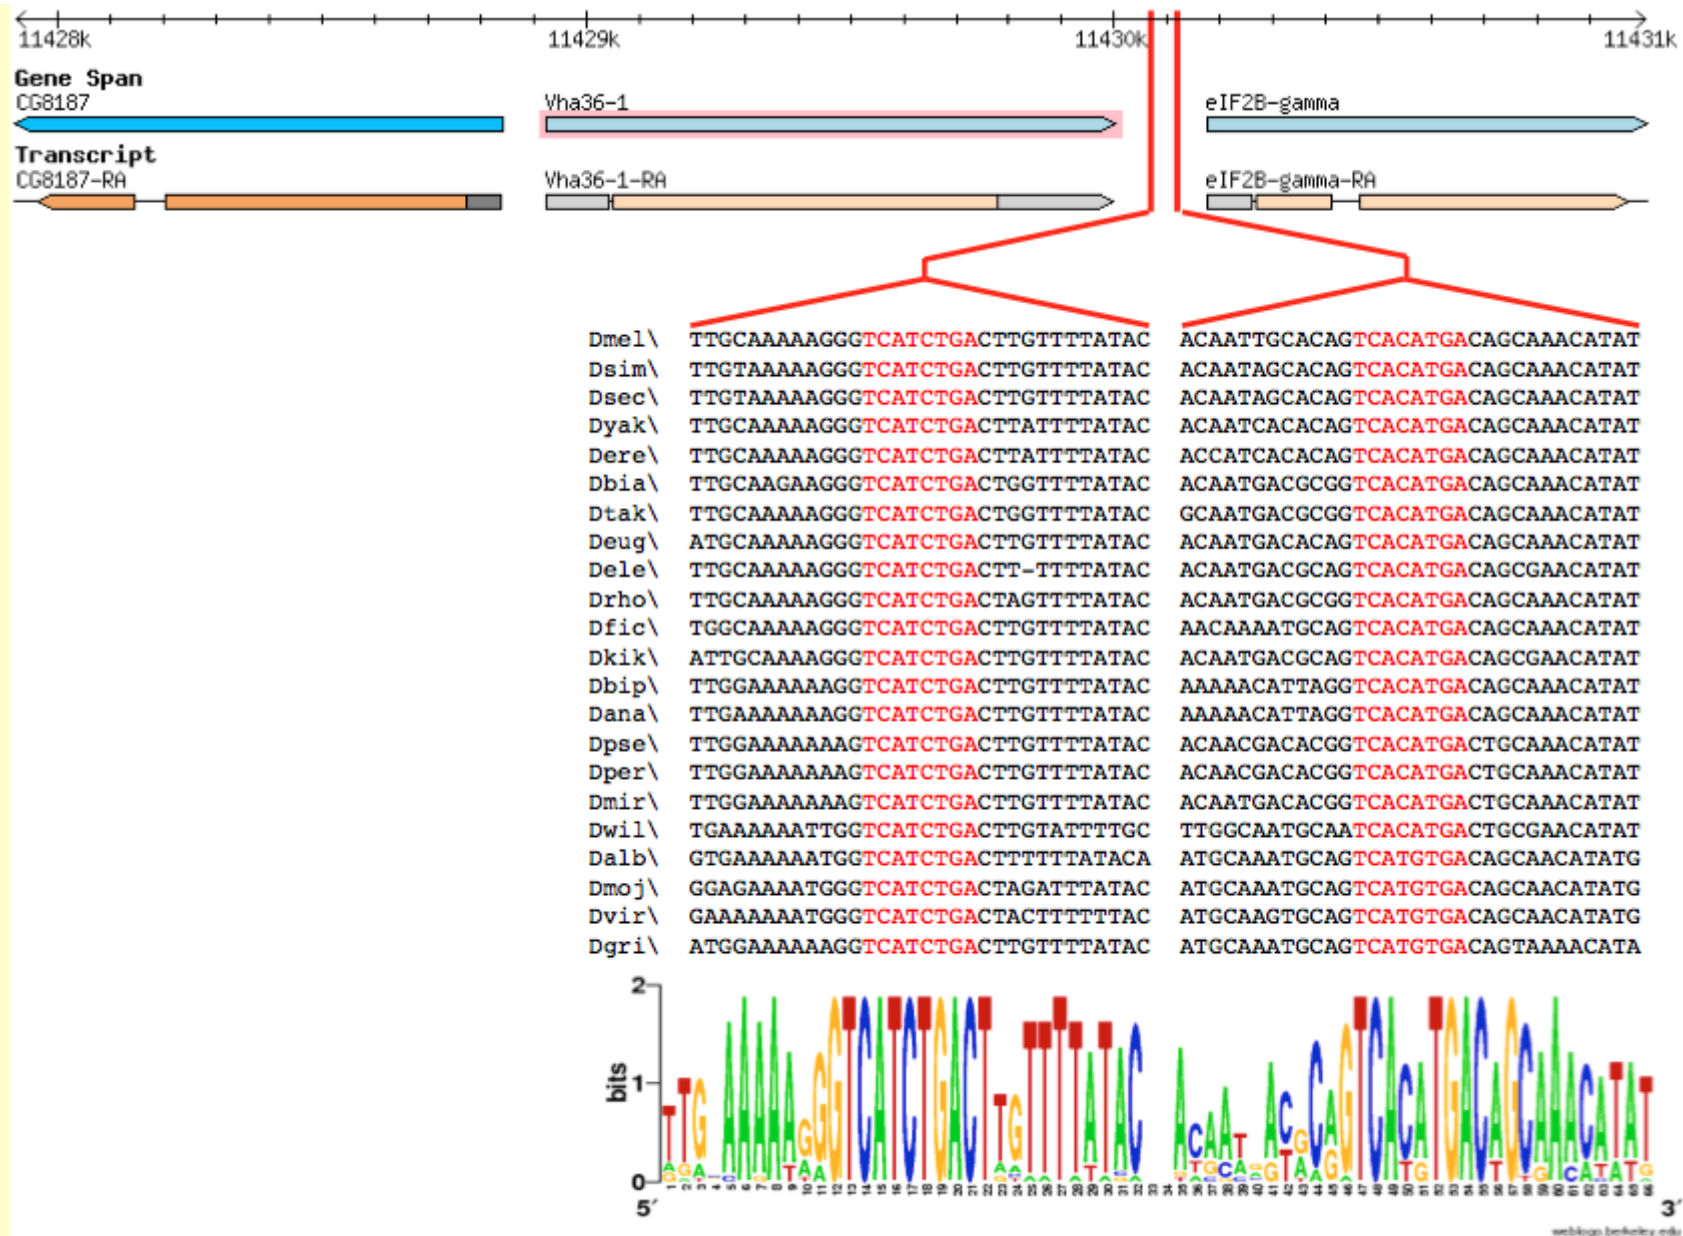

Atp6v1D gene structure comparison:

Key: UTR region, CDS region

| Species                         | Atp6v1D orthologs             | 5'exon3' |     | Extended CLEAR region | Position                                                             | bps from TSS               |
|---------------------------------|-------------------------------|----------|-----|-----------------------|----------------------------------------------------------------------|----------------------------|
| <i>Drosophila_melanogaster</i>  | <a href="#">Dmel\Vha36-1</a>  | 120      | 741 | 221                   | ttgcaaaaagggTCATCTGActgttttatac<br>acaattgcacagTCACATGAcagcaaacatat  | 3'<br>3'<br>1142<br>1193   |
| <i>Drosophila_simulans</i>      | <a href="#">Dsim\GD11125*</a> | 99       | 741 | 180                   | ttgtaaaaagggTCATCTGActgttttatac<br>acaatagcacagTCACATGAcagcaaacatat  | 3'<br>3'<br>1122<br>1173   |
| <i>Drosophila_sechellia</i>     | <a href="#">Dsec\GM21623*</a> | 97       | 741 | 178                   | ttgtaaaaagggTCATCTGActgttttatac<br>acaatagcacagTCACATGAcagcaaacatat  | 3'<br>3'<br>1119<br>1170   |
| <i>Drosophila_yakuba</i>        | <a href="#">Dyak\GE11717</a>  |          | 741 |                       | ttgcaaaaagggTCATCTGActtattttatac<br>acaatcacacagTCACATGAcagcaaacatat | 3'<br>3'<br>>1023<br>>1073 |
| <i>Drosophila_erecta</i>        | <a href="#">Dere\GG20533</a>  |          | 741 |                       | ttgcaaaaagggTCATCTGActtattttatac<br>accatcacacagTCACATGAcagcaaacatat | 3'<br>3'<br>>1022<br>>1073 |
| <i>Drosophila_biarmipes</i>     | <a href="#">Dbia\Vha36-1</a>  |          | 741 |                       | ttgcaagaagggTCATCTGActgttttatac<br>acaatgacgaggTCACATGAcagcaaacatat  | 3'<br>3'<br>>1050<br>>1101 |
| <i>Drosophila_suzukii</i>       | <a href="#">Dsuz\Vha36-1</a>  |          | 741 |                       | ttgcaaaaagggTCATCTGActgttttatac<br>acaatgacgaggTCACATGAcagcaaacatat  | 3'<br>3'<br>>1037<br>>1088 |
| <i>Drosophila_takahashii</i>    | <a href="#">Dtak\Vha36-1</a>  |          | 741 |                       | ttgcaaaaagggTCATCTGActgttttatac<br>gcaatgacgaggTCACATGAcagcaaacatat  | 3'<br>3'<br>>1039<br>>1090 |
| <i>Drosophila_eugracilis</i>    | <a href="#">Deug\Vha36-1</a>  |          | 741 |                       | atgcaaaaagggTCATCTGActgttttatac<br>acaatgacacagTCACATGAcagcaaacatat  | 3'<br>3'<br>>1027<br>>1078 |
| <i>Drosophila_elegans</i>       | <a href="#">Dele\Vha36-1</a>  |          | 741 |                       | ttgcaaaaagggTCATCTGActttttatac<br>acaatgacgaggTCACATGAcagcgaacatat   | 3'<br>3'<br>>1023<br>>1073 |
| <i>Drosophila_rhopaloea</i>     | <a href="#">Drho\Vha36-1</a>  |          | 741 |                       | ttgcaaaaagggTCATCTGActgttttatac<br>acaatgacgaggTCACATGAcagcaaacatat  | 3'<br>3'<br>>1021<br>>1072 |
| <i>Drosophila_ficusphila</i>    | <a href="#">Dfic\Vha36-1</a>  |          | 741 |                       | tggcaaaaagggTCATCTGActgttttatac<br>aacaataatgcagTCACATGAcagcaaacatat | 3'<br>3'<br>>1022<br>>1071 |
| <i>Drosophila_kikkawai</i>      | <a href="#">Dkik\Vha36-1</a>  |          | 741 |                       | attgcaaaaagggTCATCTGActgttttatac<br>acaatgacgaggTCACATGAcagcgaacatat | 3'<br>3'<br>>1027<br>>1078 |
| <i>Drosophila_bipectinata</i>   | <a href="#">Dbip\Vha36-1</a>  |          | 741 |                       | ttggaaaaaaggTCATCTGActgttttatac<br>aaaaacattaggTCACATGAcagcaaacatat  | 3'<br>3'<br>>1030<br>>1070 |
| <i>Drosophila_ananassae</i>     | <a href="#">Dana\GF11142</a>  | 87       | 741 |                       | ttgaaaaaaaggTCATCTGActgttttatac<br>aaaaacattaggTCACATGAcagcaaacatat  | 3'<br>3'<br>1116<br>1157   |
| <i>Drosophila_pseudoobscura</i> | <a href="#">Dpse\GA20878</a>  | 81       | 741 |                       | ttggaaaaaaggTCATCTGActgttttatac<br>acaacgacacaggTCACATGActgcaaacatat | 3'<br>3'<br>1078<br>1128   |
| <i>Drosophila_persimilis</i>    | <a href="#">Dper\GL20077</a>  |          | 741 |                       | ttggaaaaaaggTCATCTGActgttttatac<br>acaacgacacaggTCACATGActgcaaacatat | 3'<br>3'<br>>999<br>>1048  |
| <i>Drosophila_miranda</i>       | <a href="#">Dmir\Vha36-1</a>  |          | 741 |                       | ttggaaaaaaggTCATCTGActgttttatac<br>acaatgacacaggTCACATGActgcaaacatat | 3'<br>3'<br>>999<br>1048   |
| <i>Drosophila_willistoni</i>    | <a href="#">Dwil\GK23028</a>  | 93       | 744 | 148                   | tgaaaaaattggTCATCTGActgtattttgc<br>ttggcaatgcaaTCACATGActgcgaacatat  | 3'<br>3'<br>1147<br>1180   |

|                              |                              |    |     |  |                                                                      |          |                |
|------------------------------|------------------------------|----|-----|--|----------------------------------------------------------------------|----------|----------------|
| <i>Drosophila_albomicans</i> | <a href="#">Dalb\Vha36-1</a> |    | 741 |  | gtgaaaaatggTCATCTGActttttataca<br>atgcaaatgcagTCATGTGAcagcaacatatg   | 3'<br>3' | >1055<br>>1099 |
| <i>Drosophila_mojavensis</i> | <a href="#">Dmoj\GI20255</a> | 65 | 741 |  | ggagaaaatgggTCATCTGActagatttatac<br>atgcaaatgcagTCATGTGAcagcaacatatg | 3'<br>3' | 1132<br>1177   |
| <i>Drosophila_virilis</i>    | <a href="#">Dvir\GJ20208</a> | 84 | 747 |  | gaaaaaaatgggTCATCTGActacttttttac<br>atgcaagtgcagTCATGTGAcagcaacatatg | 3'<br>3' | 1156<br>1201   |
| <i>Drosophila_grimshawii</i> | <a href="#">Dgri\GH19969</a> | 76 | 741 |  | atggaaaaaaggTCATCTGActtggttttatac<br>atgcaaatgcagTCATGTGAcagtaaacata | 3'<br>3' | 1134<br>1179   |

Paralogs: Vha36-2 (CG13167)

| Species                         | Vha36-2 orthologs            |    | 5'exon | intron | exon3' |     |
|---------------------------------|------------------------------|----|--------|--------|--------|-----|
| <i>Drosophila_melanogaster</i>  | <a href="#">Dmel\Vha36-2</a> | 73 | 525    | 75     | 597    | 101 |
| <i>Drosophila_simulans</i>      | <a href="#">Dsim\GD10848</a> |    | 525    | 53     | 558    |     |
| <i>Drosophila_sechellia</i>     | <a href="#">Dsec\GM21350</a> |    | 525    | 53     | 558    |     |
| <i>Drosophila_yakuba</i>        | <a href="#">Dyak\GE12423</a> |    | 525    | 55     | 594    |     |
| <i>Drosophila_erecta</i>        | <a href="#">Dere\GG20264</a> |    | 525    | 63     | 621    |     |
| <i>Drosophila_biarmipes</i>     | <a href="#">Dbia\Vha36-2</a> |    | 525    | 443    | 597    |     |
| <i>Drosophila_suzukii</i>       | <a href="#">Dsuz\Vha36-2</a> |    | 525    | 333    | 660    |     |
| <i>Drosophila_takahashii</i>    | <a href="#">Dtak\Vha36-2</a> |    | 525    | 440    | 594    |     |
| <i>Drosophila_eugracilis</i>    | <a href="#">Deug\Vha36-2</a> |    | 525    | 63     | 558    |     |
| <i>Drosophila_elegans</i>       | <a href="#">Dele\Vha36-2</a> |    | 525    | 1706   | 564    |     |
| <i>Drosophila_rhopaloea</i>     | <a href="#">Drho\Vha36-2</a> |    | 525    | 284    | 555    |     |
| <i>Drosophila_ficusphila</i>    | <a href="#">Dfic\Vha36-2</a> |    | 525    | 233    | 465    |     |
| <i>Drosophila_kikkawai</i>      | <a href="#">Dkik\Vha36-2</a> |    | 531    | 64     | 441    |     |
| <i>Drosophila_bipectinata</i>   | <a href="#">Dbip\Vha36-2</a> |    | 1059   |        |        |     |
| <i>Drosophila_ananassae</i>     | <a href="#">Dana\GF12834</a> |    | 1047   |        |        |     |
| <i>Drosophila_pseudoobscura</i> | <a href="#">Dpse\GA12092</a> |    | 1020   |        |        |     |
| <i>Drosophila_persimilis</i>    | <a href="#">Dper\GL10813</a> |    | 1020   |        |        |     |
| <i>Drosophila_miranda</i>       | <a href="#">Dmir\Vha36-2</a> |    | 1020   |        |        |     |
| <i>Drosophila_willistoni</i>    | <a href="#">Dwil\GK22115</a> |    | 1077   |        |        |     |
| <i>Drosophila_albomicans</i>    | <a href="#">Dalb\Vha36-2</a> |    | 1002   |        |        |     |
| <i>Drosophila_mojavensis</i>    | <a href="#">Dmoj\GI18533</a> |    | 975    |        |        |     |
| <i>Drosophila_virilis</i>       | <a href="#">Dvir\GJ21402</a> |    | 999    |        |        |     |

| <i>Drosophila_grimshawi</i>     | <a href="#">Dgri\GH22755</a> |        | 1023   |      |        |      |        |        |     |    |
|---------------------------------|------------------------------|--------|--------|------|--------|------|--------|--------|-----|----|
| Paralogs: Vha36-3 (CG8310)      |                              |        |        |      |        |      |        |        |     |    |
| Species                         | Vha36-3 orthologs            | 5'exon | intron | exon | intron | exon | intron | exon3' |     |    |
| <i>Drosophila_melanogaster</i>  | <a href="#">Dmel\Vha36-3</a> | 83     | 41     | 60   | 118    | 55   | 364    | 61     | 227 | 45 |
| <i>Drosophila_simulans</i>      | Dsim\Vha36-3                 |        | 41     | 60   | 118    | 64   | 364    | 58     | 227 |    |
| <i>Drosophila_sechellia</i>     | Dsec\Vha36-3                 |        | ND     | ND   | 118    | 64   | 364    | 56     | 227 |    |
| <i>Drosophila_yakuba</i>        | Dyak\Vha36-3                 |        | 41     | 65   | 118    | 65   | >266   | ND     | ND  |    |
| <i>Drosophila_erecta</i>        | <a href="#">Dere\GG12609</a> |        | 41     | 72   | 118    | 61   | 364    | 68     | 227 |    |
| <i>Drosophila_biarmipes</i>     | <a href="#">Dbia\Vha36-3</a> |        | 41     | 76   | 118    | 66   | 364    | 119    | 227 |    |
| <i>Drosophila_suzukii</i>       | <a href="#">Dsuz\Vha36-3</a> |        | 41     | 68   | 118    | 64   | 364    | 147    | 227 |    |
| <i>Drosophila_takahashii</i>    | <a href="#">Dtak\Vha36-3</a> |        | 41     | 63   | 118    | 58   | 364    | 299    | 230 |    |
| <i>Drosophila_eugracilis</i>    | <a href="#">Deug\Vha36-3</a> |        | 41     | 59   | 118    | 56   | 364    | 52     | 227 |    |
| <i>Drosophila_elegans</i>       | <a href="#">Dele\Vha36-3</a> |        | 41     | 58   | 118    | 56   | 364    | 492    | 227 |    |
| <i>Drosophila_rhopaloea</i>     | <a href="#">Drho\Vha36-3</a> |        | 41     | 65   | 118    | 59   | 364    | 316    | 227 |    |
| <i>Drosophila_ficusphila</i>    | <a href="#">Dfic\Vha36-3</a> |        | 41     | 62   | 118    | 56   | 364    | 59     | 227 |    |
| <i>Drosophila_kikkawai</i>      | <a href="#">Dkik\Vha36-3</a> |        | 41     | 66   | 118    | 58   | 364    | 74     | 230 |    |
| <i>Drosophila_bipectinata</i>   | <a href="#">Dbip\Vha36-3</a> |        | 41     | 53   | 118    | 62   | 364    | 61     | 227 |    |
| <i>Drosophila_ananassae</i>     | <a href="#">Dana\GF21946</a> |        | 41     | 58   | 118    | 57   | 364    | 57     | 227 |    |
| <i>Drosophila_pseudoobscura</i> | <a href="#">Dpse\GA20975</a> |        | 41     | 59   | 118    | 54   | 364    | 58     | 227 |    |
| <i>Drosophila_persimilis</i>    | <a href="#">Dper\GL14446</a> |        | 41     | 59   | 118    | 54   | 364    | 58     | 227 |    |
| <i>Drosophila_miranda</i>       | <a href="#">Dmir\Vha36-3</a> |        | 41     | 59   | 118    | 54   | 364    | 58     | 227 |    |
| <i>Drosophila_willistoni</i>    | <a href="#">Dwi\GK24913</a>  |        | 41     | 59   | 118    | 72   | 364    | 83     | 230 |    |
| <i>Drosophila_albomicans</i>    | <a href="#">Dalb\Vha36-3</a> |        | 41     | 68   | 118    | 89   | 364    | 69     | 230 |    |
| <i>Drosophila_mojavensis</i>    | <a href="#">Dmoj\GI15892</a> |        | 41     | 78   | 118    | 85   | 364    | 57     | 230 |    |
| <i>Drosophila_virilis</i>       | <a href="#">Dvir\GJ16639</a> |        | 41     | 74   | 118    | 63   | 364    | 105    | 230 |    |
| <i>Drosophila_grimshawi</i>     | <a href="#">Dgri\GH12748</a> |        | 41     | 129  | 118    | 71   | 364    | 95     | 230 |    |
