# Supplementary material for: Structural and Comparative Analyses of Insects Suggest the Presence of an Ultra-Conserved Regulatory Element of the Genes Encoding Vacuolar-Type ATPase Subunits and Assembly Factors
Source: MDPI journal article supplement (doi:10.3390/biology12081127), 2023-08-13
Supplement: s1 [file s1]

| Gene Cluster ID                     | Atp6v0d                                                |                                            |                                           |
|-------------------------------------|--------------------------------------------------------|--------------------------------------------|-------------------------------------------|
| Drosophila melanogaster gene        | VhaAC39-1 (CG2934)                                     |                                            |                                           |
| FlyBase ID                          | FBgn0028665                                            |                                            |                                           |
| Predicted function                  | ATPase, H+ transporting, lysosomal 38kDa, V0 subunit d |                                            |                                           |
| Atp6v0d CLEAR element conservation: |                                                        |                                            |                                           |
|                                     | <u>5' / 5' UTR</u>                                     | <u>intron1</u>                             | <u>intron1</u>                            |
| Dmel\                               | AAGAGTTGAAAA <b>TCATATGA</b> CTTGTCGATCGA              | CACGCCCTGGG <b>TCACATGA</b> CCAGCGATAACA   |                                           |
| Mdom\                               | CAACTGCTATA <b>GTCAATGA</b> CAGTCGATAAAG               | TACAGGGGCAAG <b>TCATGTGA</b> CATTTGTATGTG  |                                           |
| Ccap\                               | TACCAATGACAG <b>TCATGTGA</b> TGACTTATGACA              | GGGTGGTGTGG <b>TCATGTGA</b> CACACCATTAAA   |                                           |
| Gmor\                               | ACTCTGAGAGAG <b>TCATATGA</b> CAGTAAGAATGA              | ACAAGGGCCTGG <b>TCATGTGA</b> TGCGTACTATGT  | TAGTAATAATTT <b>TCATATGA</b> ATGTATGTATGA |
| Ppap\                               | CTCAACTACGG <b>TCATATGA</b> CATTTTGATAAT               | TTGAGAAATTAT <b>TCACGTGA</b> TCTTGATTAAAC  | -----                                     |
| Llon\                               | -----                                                  | TTTTTGATTAT <b>TCACATGA</b> TTACAGGTTTC    | AAACTCTTGGAAT <b>TCATATGA</b> CCACGGAAATT |
|                                     |                                                        |                                            |                                           |
| Agam\                               | AAAAGTAGGTAGTCATATGATGCGTTTTTGCC                       | GTGTAAAGGCGGT <b>TCATATGACC</b> AGCCTTCAGC |                                           |
| Aara\                               | AAAAGTAGGTAGTCATATGATGCGTTTTTGCC                       | GTGTAAAGGCGGT <b>TCATATGACC</b> AGCCATCAGC |                                           |
| Aqan\                               | AAAAGTAGGCAGTCATATGATGCGTTTTTGCC                       | GTGTAAAGGCGGT <b>TCATATGACC</b> AGCCATCAGC |                                           |
| Achr\                               | AAAAATAGGTAGTCATATGATGCGTTTTTGCC                       | AGTAAAGGCGGGT <b>TCATATGACC</b> TGCCCTCAAA |                                           |
| Aepi\                               | GCAAAATTGTAGTCATATGATGCGTTTTTGCC                       | GGTATTGACGGGT <b>TCATATGACC</b> TGCCCTCGGT |                                           |
| Amin\                               | ACACAATTGTAGTCATATGATGCGTTTAGCT                        | ACGGCAGGCGGT <b>TCATATGACC</b> TGCTCAATAC  |                                           |
| Afun\                               | CAAAAATTGTAGTCATATGATGCGTTTACCT                        | ACGGCAGGCAGGT <b>TCATATGACC</b> TGCTCAACAC |                                           |
| Aste\                               | ACAAAATTGTAGTCATATGATACATTTTGCCC                       | CGGGTAGGCGGT <b>TCATATGACC</b> TACTCAACCG  |                                           |
| Adir\                               |                                                        | ACATAAGGCAGGT <b>TCATGTGACC</b> CCTTTGCATG |                                           |
| Aalb\                               | AAGACTGAGTAGTCATATGATGCACATTCTGC                       | TCACCCACCGGGT <b>TCATATGACC</b> GATCTTTTCA |                                           |
| Adar\                               | AGTCAGGGGTAGTCATATGATGCGCTTTCAGC                       | TCACATACTGGGT <b>TCATATGACC</b> CGCTTTTCA  |                                           |
| Aaeg\                               | TCCGAGTTCGAGTCATATGACACTTTTCAGAG                       | CATCTTGGTTGAT <b>TCATATGACC</b> TATCACACG  |                                           |
| Cqui\                               | CCCATGCGCGAGTCATATGACACTTTTCAGAG                       | CGATTTGGTTGAT <b>TCATATGACC</b> TATCATATA  |                                           |
|                                     |                                                        |                                            |                                           |
| Mdes\                               | TTCGCATTGTTA <b>TCACATGA</b> ATTGTCAATGTT              | TGTTGTTGTTAT <b>TCATATGA</b> TGAAAAGTGAC   |                                           |
|                                     |                                                        |                                            |                                           |
| Bmor\                               | TCTATGTTACAT <b>TCATATGATCAAT</b> TTTCTTT              |                                            |                                           |
| Msex\                               | TCTATGATCGCAT <b>TCATATGATCAAT</b> GCAACTC             |                                            |                                           |
| Dple\                               | TCTATGGAGCTAT <b>TCATATGATCAAT</b> GATCTAC             |                                            |                                           |
| Hmel\                               | TCTATGGAGTTAT <b>TCATATGATCAAT</b> GATCTAT             |                                            |                                           |
| Pxyl\                               | TCTATGGTCAA <b>TCATATGATCAAT</b> GAATGAT               |                                            |                                           |
|                                     |                                                        |                                            |                                           |
| Tcas\                               | ctg <b>TCACATGA</b> ttgtcactaa <b>TCATATGA</b> caa     |                                            |                                           |
| Dpon\                               | caa <b>TCACATGA</b> t..gtcaaaa <b>TCATATGA</b> cgc     |                                            |                                           |
|                                     |                                                        |                                            |                                           |
| Amel\                               | CTCACAAGATAG <b>TCATATGATCGAC</b> ACGAAAA              |                                            |                                           |
| Aflo\                               | CTCATAAGATAG <b>TCATATGATCGAC</b> ACGAAAA              |                                            |                                           |
| Bter\                               | CTCGCTAGATGG <b>TCATATGATCGAC</b> ACGAAAA              |                                            |                                           |
| Bimp\                               | CTCGCTAGATGG <b>TCATATGATCGAC</b> ACGAAAA              |                                            |                                           |
| Mrot\                               | CTCACTGTACGG <b>TCATATGATCGAC</b> ACGAAAA              |                                            |                                           |
| Ngir\                               | GTTAGACTTTAG <b>TCATATGATCGACT</b> CCTGAC              |                                            |                                           |
| Nvit\                               | GTTAGACTTTAG <b>TCATATGATCGACT</b> CCTGAC              |                                            |                                           |
| Nlon\                               | GTTAGACTTTAG <b>TCATATGATCGACT</b> CCTGAC              |                                            |                                           |
| Aech\                               | ATGACATGACAG <b>TCATATGATTTT</b> TAGAAGAGG             |                                            |                                           |
| Acep\                               | GTGACATGACAG <b>TCATATGATTTT</b> TAGAAGAGG             |                                            |                                           |
| Sinv\                               | CGGCTAGCTCG <b>TCATATGATTTT</b> TGTGAAAA               |                                            |                                           |

Pbar\ CTGCTCGTTAGTCATATGATTTTGAGAAAGG  
 Cflo\ AGTCCATATGGTCATATGATTTTCACGAAAGG  
 Lhum\ GGTTCATATGCTGTCATATGATCTTCGTGAAAA  
 Hsal\ CCGTGCGCTCGGTCATATGATCTCGGTGAAA  
 Lful\ CACATCCTCGAGTCATATGATCTGCTATCCCT

Rpro\ cagactgaattgTCATATGAatacacccctgcc  
 Phum\ tcattaatgtatTCATATGAatcattaataaat  
 Phum\ cactcttctctgTCATATGAcaacagattggg  
 Dpul\ ccgtcccaagtGTCATGTGAttctgatccgtc  
 Isca\ taactgccggagTCATATGAcaataacggccc  
 Hsap\ gcccccttatggTCACGTGAaggcgttgcgcg  
 Nvec\ ttctctgcgcggTCATGTGAttcttacatgta  
 Tadh\ gtatctcgttgcTCACATGAtcctcttgtgag

### Atp6v0d gene structure comparisons:

(Click on orthologs for genomic, mRNA and protein sequence informations)

Key: UTR region, CDS region

| Order                   | Species                          | Atp6v0d orthologs                           | 5'exon |     | intron | exon          |  | intron | exon3' |  |     | Extended CLEAR region                                                                                     |     | Position                                                             | bps from TSS           |               |              |
|-------------------------|----------------------------------|---------------------------------------------|--------|-----|--------|---------------|--|--------|--------|--|-----|-----------------------------------------------------------------------------------------------------------|-----|----------------------------------------------------------------------|------------------------|---------------|--------------|
| Diptera (Drosophilidae) | <i>Drosophila_melanogaster</i>   | <a href="#">Dmel\Vha39-1</a>                | 249    | 127 | 338    | 509           |  | 90     | 417    |  | 502 | aagagttgaaaaTCATATGActgtcgcacga<br>cacgccccctgggTCACATGAccagcgataaca                                      |     | 5'UTR<br>intron1                                                     | 47<br>437              |               |              |
| Diptera (Muscidae)      | <i>Musca_domestica</i>           | <a href="#">Mdom\Vha39-1</a>                |        | 127 | 357    | 509           |  | 948    | 417    |  |     | caactgctatagTCATATGAcagtcgataaag<br>tacaggggcaagTCATGTGAcattgtatgtg                                       |     | 5'UTR?<br>intron1                                                    | >-213<br>>223          |               |              |
| Diptera ( Tephritidae)  | <i>Ceratitis_capitata</i>        | <a href="#">Ccap\Vha39-1</a>                | 197    | 124 | 292    | 509           |  | 70     | 417    |  | 138 | taccaatgacagTCATGTGAtgacttatgaca<br>gggtggtgttggTCATGTGAcacaccattaaa                                      |     | 5'UTR?<br>intron1                                                    | -33<br>425             |               |              |
| Diptera (Glossinidae)   | <i>Glossina_morsitans</i>        | <a href="#">Gmor\Vha39-1</a>                | 199    | 127 | 213    | 509           |  | 58     | 417    |  | 158 | actctgagagagTCATATGAcagtaagaatga<br>acaagggcctggTCATGTGAtgcgtactatgt<br>tagtaataattTCATATGAatgtatgtatga   |     | 5'UTR<br>intron1<br>intron1                                          | 39<br>382<br>419       |               |              |
| Diptera (Psychodidae)   | <i>Lutzomyia_longipalpis</i>     | <a href="#">Llon\Atp6v0d</a>                | 94     | 121 | 418    | 764 (509+255) |  |        |        |  | 67  | 162                                                                                                       | 333 | tttttgatttatTCACATGAttcacaggtttc<br>aaactctggaaTCATATGAccacggaaaatt  |                        | 5'<br>5'UTR   | -617<br>12   |
|                         | <i>Phlebotomus_papatasi</i>      | <a href="#">Ppap\Atp6v0d</a>                |        | 121 | 3295   | 764 (509+255) |  |        |        |  | ND  | 162                                                                                                       |     | ctcaactacgggTCATATGAcattttgataat<br>ttgagaaattatTCACGTGAtcttgattaacc |                        | 5'<br>intron1 | >-93<br>>552 |
| -                       |                                  |                                             |        |     |        |               |  |        |        |  |     |                                                                                                           |     |                                                                      |                        |               |              |
| Diptera (Culicidae)     | <i>Anopheles_gambiae</i>         | <a href="#">Agam\Atp6v0d<br/>AGAP000721</a> | 370    | 121 | 517    | 509           |  | 1037   | 417    |  | 219 | aaaactaggtagTCATATGAtgcgtttttgcc<br>gtgtaaaggcggTCATATGAccagccttcagc<br>gcaaaatgTCATGTGAaTCACGTGAtatgcacc |     | 5'UTR<br>intron1<br>intron2                                          | 5<br>799<br>2033       |               |              |
|                         | <i>Anopheles_arabiensis</i>      | <a href="#">Aara\Atp6v0d-1</a>              |        | 121 | 500    | 509           |  | 1314   | 417    |  |     | aaaactaggtagTCATATGAtgcgtttttgcc<br>gtgtaaaggcggTCATATGAccagccatcagc<br>gcgaaatgTCATGTGAaTCACGTGAtaatcacc |     | 5'UTR?<br>intron1<br>intron2                                         | >-368<br>>438<br>>1603 |               |              |
|                         | <i>Anopheles_quadriannulatus</i> | <a href="#">Aqan\Atp6v0d-1</a>              |        | 121 | 511    | 509           |  | 1305   | 417    |  |     | aaaactaggcagTCATATGAtgcgtttttgcc<br>gtgtaaaggcggTCATATGAccagccatcagc<br>gcaaaatgTCATGTGAaTCACGTGAtaatcacc |     | 5'UTR<br>intron1<br>intron2                                          | >-368<br>>451<br>>1617 |               |              |
|                         | <i>Anopheles_christyi</i>        | <a href="#">Achr\Atp6v0d-1</a>              |        | 121 | 495    | 509           |  | 450    | 417    |  |     | aaaaataggtagTCATATGAtgcgtttttgcc<br>agtaaaggcgggTCATATGAcctgccttcaaa                                      |     | 5'UTR<br>intron1                                                     | >-317<br>>421          |               |              |
|                         | <i>Anopheles_epiroticus</i>      | <a href="#">Aepi\Atp6v0d-1</a>              |        | 121 | 1287   | 509           |  | 792    | 417    |  |     | gcaaaattgtagTCATATGAtgcgtttttgcc<br>ggtattgacgggTCATATGAcctgccttcggt                                      |     | 5'UTR<br>intron1                                                     | >-326<br>>445          |               |              |

|                                  |                                               |     |      |     |               |     |                 |     |                                                                      |                   |               |
|----------------------------------|-----------------------------------------------|-----|------|-----|---------------|-----|-----------------|-----|----------------------------------------------------------------------|-------------------|---------------|
| <i>Anopheles_minimus</i>         | <a href="#">Amin\Atp6v0d-1</a>                |     | 121  | 365 | 509           | 72  | 417             |     | acacaattgtagTCATATGAtgcgttttagct<br>acggcaggcgggTCATATGAcctgctcaatac | 5'UTR<br>intron1  | >-370<br>>309 |
| <i>Anopheles_funestus</i>        | <a href="#">Afun\Atp6v0d-1</a>                |     | 121  | 418 | 509           | 77  | 417             |     | caaaaattgtagTCATATGAtgcgttttacct<br>acggcaggcaggTCATATGAcctgctcaacac | 5'UTR<br>intron1  | >-378<br>>304 |
| <i>Anopheles_stephensi</i>       | <a href="#">Aste\Atp6v0d-1</a>                |     | 121  | 413 | 509           | 79  | >392            |     | acaaaattgtagTCATATGAtacatttggccc<br>cgggtaggcgggTCATATGAcctactcaaccg | 5'UTR<br>intron1  | >-436<br>>372 |
| <i>Anopheles_dirus</i>           | <a href="#">Adir\Atp6v0d-1</a>                |     | 121  | 314 | 509           | 62  | 417             |     | acataaggcaggTCATGTGAcccttttgcattg                                    | 5'UTR?<br>intron1 | >293          |
| <i>Anopheles_nili</i>            | Anil\Atp6v0d-1                                |     |      |     |               |     |                 |     |                                                                      |                   |               |
| <i>Anopheles_albimanus</i>       | <a href="#">Aalb\Atp6v0d-1</a>                |     | 121  | 467 | 509           | 73  | 417             |     | aagactgagtagTCATATGAtgcacattctgc<br>tcaccaccgggTCATATGAccgatcttttca  | 5'UTR?<br>intron1 | >-254<br>>385 |
| <i>Anopheles_darlingi</i>        | <a href="#">Adar\Atp6v0d-1</a>                |     | 121  | 633 | 509           | 92  | 417             | 421 | agtcaggggtagTCATATGAtgcgtttcagc<br>tcacatactgggTCATATGAccgtcttttca   | 5'UTR?<br>intron1 | >-244<br>>450 |
| <i>Aedes_aegypti</i>             | <a href="#">Aaeg\Atp6v0d<br/>AAEL011025*</a>  | 143 | 121  | ND  | 509           | 337 | 417 (255 + 162) | 445 | tccgagtgcgagTCATATGAcacttttcagag<br>catcttggttgaTCATATGAccttatcacacg | 5'<br>intron1     | -20<br>409    |
| <i>Culex_pipiens_qui.</i>        | <a href="#">Cqui\Atp6v0d<br/>CPU009947</a>    |     | 121  | ND  | 926 (509+417) |     |                 | 110 | cccatgcgcgagTCATATGAcacttttcagag<br>cgatttggttgaTCATATGAccttatcatata | 5'<br>intron1     | >-154<br>>255 |
| <i>Anopheles_gambiae</i>         | <a href="#">Agam\Atp6v0d-2<br/>AGAP013199</a> |     | 1044 |     |               |     |                 |     | ND                                                                   |                   |               |
| <i>Anopheles_arabiensis</i>      | <a href="#">Aara\Atp6v0d-2</a>                |     | 1044 |     |               |     |                 |     | ND                                                                   |                   |               |
| <i>Anopheles_quadriannulatus</i> | <a href="#">Aqan\Atp6v0d-2</a>                |     | 1044 |     |               |     |                 |     | ND                                                                   |                   |               |
| <i>Anopheles_christyi</i>        | <a href="#">Achr\Atp6v0d-2</a>                |     | 1044 |     |               |     |                 |     | ND                                                                   |                   |               |
| <i>Anopheles_epiroticus</i>      | <a href="#">Aepi\Atp6v0d-2</a>                |     | 1044 |     |               |     |                 |     | ND                                                                   |                   |               |
| <i>Anopheles_minimus</i>         | <a href="#">Amin\Atp6v0d-2</a>                |     | 1044 |     |               |     |                 |     | ND                                                                   |                   |               |
| <i>Anopheles_funestus</i>        | <a href="#">Afun\Atp6v0d-2</a>                |     | 1044 |     |               |     |                 |     | ND                                                                   |                   |               |
| <i>Anopheles_stephensi</i>       | <a href="#">Aste\Atp6v0d-2</a>                |     | 1044 |     |               |     |                 |     | ND                                                                   |                   |               |
| <i>Anopheles_dirus</i>           | <a href="#">Adir\Atp6v0d-2</a>                |     | 1044 |     |               |     |                 |     | ND                                                                   |                   |               |
| <i>Anopheles_nili</i>            | <a href="#">Anil\Atp6v0d-2</a>                |     | 1044 |     |               |     |                 |     | ND                                                                   |                   |               |
| <i>Anopheles_albimanus</i>       | <a href="#">Aalb\Atp6v0d-2</a>                |     | 1068 |     |               |     |                 |     | ND                                                                   |                   |               |
| <i>Anopheles_darlingi</i>        | <a href="#">Adar\Atp6v0d-2</a>                |     | 1071 |     |               |     |                 |     | ND                                                                   |                   |               |

Diptera  
(Cecidomyiidae)

|                             |                              |     |     |     |     |     |     |     |     |    |                                                                   |               |               |
|-----------------------------|------------------------------|-----|-----|-----|-----|-----|-----|-----|-----|----|-------------------------------------------------------------------|---------------|---------------|
| <i>Mayetiola destructor</i> | <a href="#">Mdes\Atp6v0d</a> |     | 121 | 332 | 509 | 76  | 255 | 81  | 162 |    | ttegcattgtagTCACATGAattgcaatggt<br>tggttggttagTCATATGAtgaaaaagtgc | 5'<br>intron1 | >-171<br>>310 |
| <i>Bombyx mori</i>          | <a href="#">Bmor\Atp6v0d</a> |     | 121 | 786 | 509 | 213 | 255 | 262 | 162 |    | tctatgttcacaTCATATGAtcaattttctt                                   | 5'            | >-117         |
| <i>Manduca sexta</i>        | <a href="#">Msex\Atp6v0d</a> |     | 121 | 272 | 509 | 75  | 255 | 335 | 162 |    | tctatgatcgcaTCATATGAtcaatgcaactc                                  | 5'            | >-126         |
| <i>Danaus plexippus</i>     | <a href="#">Dple\Atp6v0d</a> | 110 | 121 | 176 | 509 | 86  | 255 | 82  | 162 | 59 | tctatggagctaTCATATGAtcaatgatctac                                  | 5'UTR         | 5             |
| <i>Heliconius melpomene</i> | <a href="#">Hmel\Atp6v0d</a> |     | 121 | 157 | 509 | 408 | 255 | 332 | 162 |    | tctatggagttagTCATATGAtcaatgatctat                                 | 5'            | >-97          |

|              |                                |                                              |        |     |     |                          |      |                 |     |              |      |              |      |     |      |      |     |                                                                     |             |               |
|--------------|--------------------------------|----------------------------------------------|--------|-----|-----|--------------------------|------|-----------------|-----|--------------|------|--------------|------|-----|------|------|-----|---------------------------------------------------------------------|-------------|---------------|
|              | <i>Plutella_xylostella</i>     | <a href="#">Pxy\Atp6v0d</a>                  | 129    | 121 | 102 | 509                      |      |                 |     |              | 78   | 255          |      |     | 141  | 162  | 334 | tctatggtcaaaTCATATGAtcaatgaatgat                                    | 5'UTR       | 26            |
| Strepsiptera | <i>Mengenilla_moldrzyki</i>    | <a href="#">Mmol\Atp6v0d</a>                 |        | 121 | ND  | 509?                     |      |                 |     |              | ND   | 408          |      |     |      |      |     | ND                                                                  |             |               |
| Coleoptera   | <i>Tribolium_castaneum</i>     | <a href="#">Tcas\Atp6v0d<br/>LOC663777</a>   | 73     | 121 | 50  | 509 (351+158)            |      |                 |     |              | 43   | 255(177+178) |      |     | 54   | 162  | 192 | TCACATGAttgactactaaTCATATGAcatttagttg                               | 5'/5'UTR    | -4/6          |
|              | <i>Dendroctonus_ponderosae</i> | <a href="#">Dpon\Atp6v0d</a>                 | 73     | 121 | 801 | 926 (351+158+177+78+162) |      |                 |     |              |      |              |      |     |      |      | 267 | tgcacatgacaaTCACATGAtctccaaggat<br>ggattgtcaaaaTCATATGAcgtcgggcggag | 5'<br>5'UTR | -9<br>13      |
| Hymenoptera  | <i>Apis_mellifera</i>          | <a href="#">Amel\Atp6v0d<br/>GB12698</a>     | 112    | 121 | 121 | 351                      | 125  | 158             | 94  | 177          | 155  | 78           | 102  | 162 | 411  |      |     | ctcacaagatagTCATATGAtcgacacgaaaa                                    | 5'UTR       | 20            |
|              | <i>Apis_florea</i>             | <a href="#">Aflo\Atp6v0d</a>                 |        | 121 | 126 | 351                      | 119  | 158             | 115 | 177          | 133  | 78           | 97   | 162 |      |      |     | ctcataagatagTCATATGAtcgacacgaaaa                                    | 5'          | >-84          |
|              | <i>Bombus_terrestris</i>       | <a href="#">Bter\Atp6v0d</a>                 |        | 121 | 126 | 351                      | 129  | 158             | 209 | 177          | 118  | 78           | 76   | 162 |      |      |     | ctcgctagatggTCATATGAtcgacacgaaaa                                    | 5'          | >-84          |
|              | <i>Bombus_impatiens</i>        | <a href="#">Bimp\Atp6v0d</a>                 |        | 121 | 126 | 351                      | 142  | 158             | 209 | 177          | 118  | 78           | 77   | 162 |      |      |     | ctcgctagatggTCATATGAtcgacacgaaaa                                    | 5'          | >-84          |
|              | <i>Megachile_rotundata</i>     | <a href="#">Mrot\Atp6v0d</a>                 |        | 121 | 90  | 351                      | 123  | 158             | 77  | 177          | 79   | 78           | 77   | 162 |      |      |     | ctcactgtacggTCATATGAtcgacacgaaaa                                    | 5'          | >-92          |
|              | <i>Acromyrmex_echinator</i>    | <a href="#">Aech\Atp6v0d</a>                 |        | 121 | 258 | 351                      | 145  | 158             | 76  | 177          | 1075 | 78           | 190  | 162 |      |      |     | atgacatgacagTCATATGAttttagaagagg                                    | 5'          | >-81          |
|              | <i>Atta_cephalotes</i>         | <a href="#">Acep\Atp6v0d</a>                 |        | 121 | 249 | 351                      | 132  | 158             | 73  | 177          | 1121 | 78           | ND   | 162 |      |      |     | gtgacatgacagTCATATGAttttagaagagg                                    | 5'          | >-81          |
|              | <i>Solenopsis_invicta</i>      | <a href="#">Sinv\Atp6v0d</a>                 | 76     | 121 | 389 | 351                      | 2226 | 158             | 281 | 177          | ND   | 78           | 136  | 162 |      |      |     | cggctagctcggTCATATGAttttgggaaaa                                     | 5'          | >-86          |
|              | <i>Camponotus_floridanus</i>   | <a href="#">Cflo\Atp6v0d</a>                 |        | 121 | 789 | 351                      | 524  | 158             | 86  | 177          | 141  | 78           | 140  | 162 |      |      |     | agtccattattgTCATATGAttttcacgaagg                                    | 5'          | >-105         |
|              | <i>Harpegnathos_saltator</i>   | <a href="#">Hsal\Atp6v0d</a>                 |        | 121 | 242 | 351                      | 310  | 158             | 76  | 177          | 119  | 78           | 110  | 162 |      |      |     | ccgtgcgctcggTCATATGAtctcggtgaaaa                                    | 5'          | >-95          |
|              | <i>Pogonomyrmex_barbatus</i>   | <a href="#">Pbar\Atp6v0d</a>                 |        | 121 | 263 | 351                      | 117  | 158             | 67  | 177          | 135  | 78           | 163  | 162 |      |      |     | ctgctcgtttagTCATATGAttttgagaaagg                                    | 5'          | >-84          |
|              | <i>Linepithema_humile</i>      | <a href="#">Lhum\Atp6v0d</a>                 |        | 121 | 239 | 351                      | 102  | 158             | 102 | 255(177+178) |      |              | 110  | 162 |      |      |     | ggtcatatcgtcTCATATGAtcttcgtgaaaa                                    | 5'          | >-81          |
|              | <i>Nasonia_vitripennis</i>     | <a href="#">Nvit\Atp6v0d<br/>NV13431</a>     |        | 121 | 82  | 351                      | 90   | 158             | 80  | 177          | 89   | 78           | 89   | 162 | 433  |      |     | gttagacttttagTCATATGAtcgactcctgac                                   | 5'UTR?      | >-151         |
|              | <i>Nasonia_giraulti</i>        | <a href="#">Ngir\Atp6v0d</a>                 |        | 121 | 82  | 351                      | 90   | 158             | 88  | 177          | 88   | 78           | 89   | 162 |      |      |     | gttagacttttagTCATATGAtcgactcctgac                                   | 5'UTR?      | >-151         |
|              | <i>Nasonia_longicornis</i>     | <a href="#">Nlon\Atp6v0d</a>                 |        | 121 | 82  | 351(172+179)             | 90   | 158             | 80  | 177          | 88   | 78           | 89   | 162 |      |      |     | gttagacttttagTCATATGAtcgactcctgac                                   | 5'UTR?      | >-151         |
| Hemiptera    | <i>Acyrtosiphon_pisum</i>      | <a href="#">Apis\Atp6v0d<br/>ACYPI003170</a> | 197+16 | 786 |     |                          |      |                 |     |              | 85   | 270          |      |     |      |      |     | ND                                                                  |             |               |
|              | <i>Rhodnius_prolixus</i>       | <a href="#">Rpro\Atp6v0d</a>                 |        | 121 | 116 | 172                      | 1506 | 179             | 81  | 158          | 143  | 177          | 520  | 78  | 233  | 162  |     | cagactgaattgTCATATGAatacacctgcc                                     | 5'          | >-740         |
| Phthiraptera | <i>Pediculus_humanus</i>       | <a href="#">Phum\Atp6v0d<br/>PHUM410380</a>  |        | 121 | 100 | 172                      | 67   | 179             | 177 | 158          | 90   | 177          | 80   | 78  | 86   | >144 |     | tcattaatgtatTCATATGAatcattaaaaat<br>cactcttctagTCATATGAcaacagattggg | 5'<br>5'    | >-228<br>>-71 |
| Odonata      | <i>Ladona_fulva</i>            | <a href="#">Lful\Atp6v0d</a>                 |        | 121 | 72  | 172                      | 79   | 179             | 111 | 158          | 477  | 177          | 1429 | 78  | 84   | 162  |     | cacatcctcgagTCATATGAtctgctatccct                                    | 5'          | >-95          |
| Crustacea    | <i>Daphnia_pulex</i>           | <a href="#">Dpul\Atp6v0d</a>                 |        | 121 | 64  | 172                      | 76   | 337 (179 + 158) |     |              | 65   | 177          | 59   | 78  | 60   | 162  | 167 | ccgtccaagtgtTCATGTGAttctgatccgtc                                    | 5'          | >-108         |
| Ixodida      | <i>Ixodes_scapularis</i>       | <a href="#">Iscap\Atp6v0d<br/>ISCW002101</a> | 53     | 121 | ND  | 172                      | 3991 | 179             | 127 | 158(80+78)   | 814  | 177          | 74   | 78  | 1886 | 162  |     | taactgccggagTCATATGAtcaatagcgccc                                    | 5'UTR       | 29            |

|          |                               |                                  |     |     |       |     |      |     |      |    |      |    |     |     |      |    |     |     |     |                                  |    |       |
|----------|-------------------------------|----------------------------------|-----|-----|-------|-----|------|-----|------|----|------|----|-----|-----|------|----|-----|-----|-----|----------------------------------|----|-------|
|          | <i>Homo_sapiens</i>           | <a href="#">ATP6V0D1</a>         | 100 | 130 | 27241 | 172 | 8837 | 179 | 1349 | 80 | 3747 | 78 | 126 | 177 | 100  | 78 | 103 | 162 |     | gcccccttatggTCACGTGAggcgttgcgcg  | 5' | -23   |
| Cnidaria | <i>Nematostella_vectensis</i> | v1g128006                        |     | 130 | 2206  | 172 | 456  | 179 | 880  | 80 | 357  | 78 | 513 | 177 | 1100 | 78 | 385 | 162 |     | ttctcgccggTCATGTGAttcctacatgta   | 5' | >-81  |
| Placozoa | <i>Trichoplax_adhaerens</i>   | <a href="#">TRIADDRAFT_37067</a> |     | 127 | 287   | 172 | 126  | 179 | 122  | 80 | 211  | 78 | 144 | 177 | 79   | 78 | 79  | 162 | 712 | atctcgttgcTCACATGAtcctcttgtgagtc | 5' | >-324 |
|          |                               |                                  |     |     |       |     |      |     |      |    |      |    |     |     |      |    |     |     |     |                                  |    |       |
|          |                               |                                  |     |     |       |     |      |     |      |    |      |    |     |     |      |    |     |     |     |                                  |    |       |
|          |                               |                                  |     |     |       |     |      |     |      |    |      |    |     |     |      |    |     |     |     |                                  |    |       |
