# Supplementary material for: Structural and Comparative Analyses of Insects Suggest the Presence of an Ultra-Conserved Regulatory Element of the Genes Encoding Vacuolar-Type ATPase Subunits and Assembly Factors
Source: MDPI journal article supplement (doi:10.3390/biology12081127), 2023-08-13
Supplement: s1 [file s1]

|                                     |                                                               |
|-------------------------------------|---------------------------------------------------------------|
| Gene Cluster ID                     | Atp6v0d                                                       |
| <b>Drosophila melanogaster gene</b> | <b>VhaAC39-1 (CG2934)</b>                                     |
| FlyBase ID                          | <a href="#">FBgn0028665</a>                                   |
| <b>Predicted function</b>           | <b>ATPase, H+ transporting, lysosomal 38kDa, V0 subunit d</b> |
| Protein size                        | 350 amino acids                                               |
| Cytogenetic map                     | X:3F4-3F4                                                     |
| Gene sequence location              | <a href="#">X:3774773..3777004</a> [+]                        |
| <b>Dmel CLEAR sequence</b>          | <b>TCATATGA; TCACATGA</b>                                     |
| CLEAR sequence locations            | X:3774820..3774827; X:3775210..3775217                        |
| Drosophila Atp6v0d paralog          | <a href="#">VhaAC39-2</a>                                     |

FlyBase Vha39-1 (CG2934) gene model & CLEAR element (red) positions:

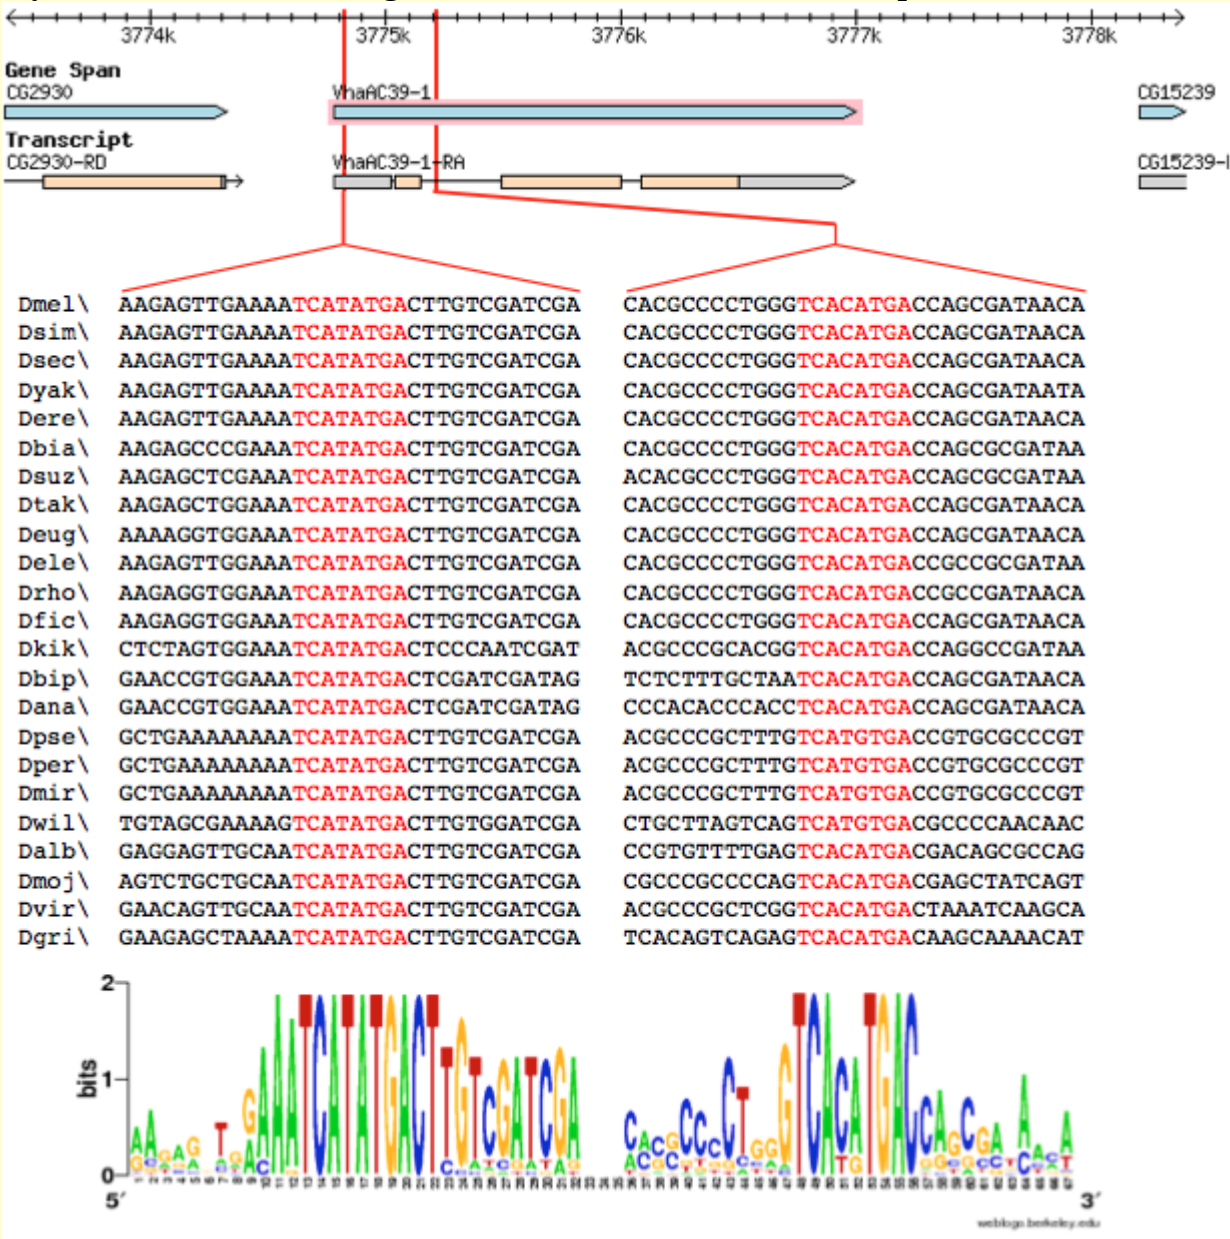

Drosophila Atp6v0d gene structure comparison:

Key: UTR region, CDS region

| Species                         | Atp6v0d orthologs              | 5'exon |     | intron | exon | intron | exon3' |     | Extended CLEAR region                                                 | Position          | bps from TSS |
|---------------------------------|--------------------------------|--------|-----|--------|------|--------|--------|-----|-----------------------------------------------------------------------|-------------------|--------------|
| <i>Drosophila_melanogaster</i>  | <a href="#">Dmel\VhaAC39-1</a> | 249    | 127 | 338    | 509  | 90     | 417    | 502 | aagagttgaaaaTCATATGActtgatcgacga<br>cacgcccctgggTCACATGAccagcgataaca  | 5'UTR<br>intron1  | 47<br>437    |
| <i>Drosophila_simulans</i>      | <a href="#">Dsim\GD16660*</a>  |        | 127 | 348    | 509  | 90     | 417    |     | aagagttgaaaaTCATATGActtgatcgacga<br>cacgcccctgggTCACATGAccagcgataaca  | 5'UTR?<br>intron1 |              |
| <i>Drosophila_sechellia</i>     | <a href="#">Dsec\GM12314</a>   |        | 127 | 348    | 509  | 90     | 417    |     | aagagttgaaaaTCATATGActtgatcgacga<br>cacgcccctgggTCACATGAccagcgataaca  | 5'UTR?<br>intron1 |              |
| <i>Drosophila_yakuba</i>        | <a href="#">Dyak\GE16319</a>   |        | 127 | 384    | 509  | 70     | 417    |     | aagagttgaaaaTCATATGActtgatcgacga<br>cacgcccctgggTCACATGAccagcgataata  | 5'UTR?<br>intron1 |              |
| <i>Drosophila_erecta</i>        | <a href="#">Dere\GG18679</a>   |        | 127 | 369    | 509  | 90     | 417    |     | aagagttgaaaaTCATATGActtgatcgacga<br>cacgcccctgggTCACATGAccagcgataaca  | 5'UTR?<br>intron1 |              |
| <i>Drosophila_biarmipes</i>     | <a href="#">Dbia\VhaAC39-1</a> |        | 127 | 658    | 509  | 357    | 417    |     | aagagcccgaTCATATGActtgatcgacga<br>cacgcccctgggTCACATGAccagcgataaa     | 5'UTR?<br>intron1 |              |
| <i>Drosophila_suzukii</i>       | <a href="#">Dsuz\VhaAC39-1</a> |        | 127 | 671    | 509? | ND     | 417?   |     | aagagctcgaaaTCATATGActtgatcgacga<br>acagcccctgggTCACATGAccagcgataaa   | 5'UTR?<br>intron1 |              |
| <i>Drosophila_takahashii</i>    | <a href="#">Dtak\VhaAC39-1</a> |        | 127 | 660    | 509  | 357    | 417    |     | aagagctggaaaTCATATGActtgatcgacga<br>cacgcccctgggTCACATGAccagcgataaca  | 5'UTR?<br>intron1 |              |
| <i>Drosophila_eugracilis</i>    | <a href="#">Deug\VhaAC39-1</a> |        | 127 | 536    | 509  | 162    | 417    |     | aaaaggtgaaaTCATATGActtgatcgacga<br>cacgcccctgggTCACATGAccagcgataaca   | 5'UTR?<br>intron1 |              |
| <i>Drosophila_elegans</i>       | <a href="#">Dele\VhaAC39-1</a> |        | 127 | 899    | 509  | 731    | 417    |     | aagagttgaaaTCATATGActtgatcgacga<br>cacgcccctgggTCACATGAccgcccataaa    | 5'UTR?<br>intron1 |              |
| <i>Drosophila_rhopaloea</i>     | <a href="#">Drho\VhaAC39-1</a> |        | 127 | 734    | 509  | 350    | 417    |     | aagaggtgaaaTCATATGActtgatcgacga<br>cacgcccctgggTCACATGAccgcccataaca   | 5'UTR?<br>intron1 |              |
| <i>Drosophila_ficusphila</i>    | <a href="#">Dfic\VhaAC39-1</a> |        | 127 | 579    | 509  | 279    | 417    |     | aagaggtgaaaTCATATGActtgatcgacga<br>cacgcccctgggTCACATGAccagcgataaca   | 5'UTR?<br>intron1 |              |
| <i>Drosophila_kikkawai</i>      | <a href="#">Dkik\VhaAC39-1</a> |        | 127 | 539    | 509  | 76     | 417    |     | ctctagtggaaaTCATATGActcccaatcgat<br>acgcccgcacggTCACATGAccagggcgataaa | 5'UTR?<br>intron1 |              |
| <i>Drosophila_bipectinata</i>   | <a href="#">Dbip\VhaAC39-1</a> |        | 127 | 431    | 509  | 60     | 417    |     | gaaccgtggaaaTCATATGActcgatcgatag<br>tctcttgctaaTCACATGAccagcgataaca   | 5'UTR?<br>intron1 |              |
| <i>Drosophila_ananassae</i>     | <a href="#">Dana\GF21182</a>   |        | 127 | 471    | 509  | 81     | 417    |     | gaaccgtggaaaTCATATGActcgatcgatag<br>cccacaccaccTCACATGAccagcgataaca   | 5'UTR?<br>intron1 |              |
| <i>Drosophila_pseudoobscura</i> | <a href="#">Dpse\GA15530</a>   |        | 127 | 237    | 509  | 68     | 417    |     | gctgaaaaaaaaTCATATGActtgatcgacga<br>acgcccgtttgTCATGTGAccgtgcccgt     | 5'UTR?<br>intron1 |              |
| <i>Drosophila_persimilis</i>    | <a href="#">Dper\GL14761</a>   |        | 127 | 237    | 509  | 68     | 417    |     | gctgaaaaaaaaTCATATGActtgatcgacga<br>acgcccgtttgTCATGTGAccgtgcccgt     | 5'UTR?<br>intron1 |              |
| <i>Drosophila_miranda</i>       | <a href="#">Dmir\Vha39-1</a>   |        | 127 | 235    | 509  | 68     | 417    |     | gctgaaaaaaaaTCATATGActtgatcgacga<br>acgcccgtttgTCATGTGAccgtgcccgt     | 5'UTR?<br>intron1 |              |

|                              |                              |  |     |     |     |     |     |  |                                                                      |                   |  |
|------------------------------|------------------------------|--|-----|-----|-----|-----|-----|--|----------------------------------------------------------------------|-------------------|--|
| <i>Drosophila_willistoni</i> | <a href="#">Dwil\GK10228</a> |  | 127 | 409 | 509 | 71  | 417 |  | tgtagcgaaaagTCATATGActtgatcgacga<br>ctgcttagtcagTCATGTGAcgccccacaac  | 5'UTR?<br>intron1 |  |
| <i>Drosophila_albomicans</i> | <a href="#">Dalb\Vha39-1</a> |  | 127 | 409 | 509 | 71  | 417 |  | gaggagttgcaaTCATATGActtgatcgacga<br>ccgtgttttgagTCACATGAcgacagcgccag | 5'UTR?<br>intron1 |  |
| <i>Drosophila_mojavensis</i> | <a href="#">Dmoj\GI16480</a> |  | 127 | 733 | 509 | 61  | 417 |  | agtctgctgcaaTCATATGActtgatcgacga<br>cgccccccagTCACATGAcgagctatcagt   | 5'UTR?<br>intron1 |  |
| <i>Drosophila_virilis</i>    | <a href="#">Dvir\GJ16024</a> |  | 127 | 244 | 509 | 190 | 417 |  | gaacagttgcaaTCATATGActtgatcgacga<br>acgcccgcctggTCACATGActaatcaagca  | 5'UTR'<br>intron1 |  |
| <i>Drosophila_grimshawi</i>  | <a href="#">Dgri\GH17612</a> |  | 127 | 811 | 509 | 63  | 423 |  | gaagagctaaaaTCATATGActtgatcgacga<br>tcacagtcagagTCACATGAcaagcaaacat  | 5'UTR?<br>intron1 |  |

Paralogs: VhaAC39-2 (CG4624)

|                                |                                     |    |     |     |     |     |  |  |
|--------------------------------|-------------------------------------|----|-----|-----|-----|-----|--|--|
| <i>Drosophila_melanogaster</i> | <a href="#">Dmel\VhaAC39-<br/>2</a> | 77 | 686 | 67  | 367 | 103 |  |  |
| <i>Drosophila_simulans</i>     | <a href="#">Dsim\GD18401</a>        |    | 686 | 59  | ND  |     |  |  |
| <i>Drosophila_sechellia</i>    | <a href="#">Dsec\GM23587</a>        |    | 686 | 59  | 367 |     |  |  |
| <i>Drosophila_yakuba</i>       | <a href="#">Dyak\GE23978</a>        |    | 686 | 58  | 367 |     |  |  |
| <i>Drosophila_erecta</i>       | <a href="#">Dere\GG12455</a>        |    | 686 | 66  | 367 |     |  |  |
| <i>Drosophila_biarmipes</i>    | <a href="#">Dbia\VhaAC39-<br/>2</a> |    | 686 | 57  | 367 |     |  |  |
| <i>Drosophila_takahashii</i>   | <a href="#">Dtak\VhaAC39-<br/>2</a> |    | 686 | 192 | 367 |     |  |  |
| <i>Drosophila_suzukii</i>      | <a href="#">Dsuz\VhaAC39-<br/>2</a> |    | 686 | 60  | 367 |     |  |  |
| <i>Drosophila_eugracilis</i>   | <a href="#">Deug\VhaAC39-<br/>2</a> |    | 686 | 57  | 367 |     |  |  |
| <i>Drosophila_ficusphila</i>   | <a href="#">Dfic\VhaAC39-2</a>      |    | 686 | 59  | 367 |     |  |  |
| <i>Drosophila_elegans</i>      | <a href="#">Dele\VhaAC39-<br/>2</a> |    | 686 | 84  | 367 |     |  |  |
| <i>Drosophila_rhopaloea</i>    | <a href="#">Drho\VhaAC39-<br/>2</a> |    | 686 | 121 | 367 |     |  |  |
| <i>Drosophila_kikkawai</i>     | <a href="#">Dkik\VhaAC39-<br/>2</a> |    | 686 | 57  | 370 |     |  |  |
| <i>Drosophila_bipectinata</i>  | <a href="#">Dbip\VhaAC39-<br/>2</a> |    | 683 | 62  | 370 |     |  |  |
| <i>Drosophila_ananassae</i>    | <a href="#">Dana\GF18027</a>        |    | 683 | 51  | 370 |     |  |  |

|                                 |                                |  |      |  |  |
|---------------------------------|--------------------------------|--|------|--|--|
| <i>Drosophila_pseudoobscura</i> | <a href="#">Dpse\GA18311</a>   |  | 1047 |  |  |
| <i>Drosophila_persimilis</i>    | <a href="#">Dper\GL23045</a>   |  | 1047 |  |  |
| <i>Drosophila_miranda</i>       | <a href="#">Dmir\VhaAC39-2</a> |  | 1047 |  |  |
| <i>Drosophila_willistoni</i>    | <a href="#">Dwil\GK22588</a>   |  | 1062 |  |  |
| <i>Drosophila_albomicans</i>    | Dalb\VhaAC39-2                 |  | ND   |  |  |
| <i>Drosophila_mojavensis</i>    | <a href="#">Dmoj\GI10510</a>   |  | 1056 |  |  |
| <i>Drosophila_virilis</i>       | <a href="#">Dvir\GJ23190</a>   |  | 1059 |  |  |
| <i>Drosophila_grimshawi</i>     | <a href="#">Dgri\GH21449</a>   |  | 1056 |  |  |
| Key: UTR region, CDS region     |                                |  |      |  |  |
|                                 |                                |  |      |  |  |
|                                 |                                |  |      |  |  |
