# Supplementary material for: Structural and Comparative Analyses of Insects Suggest the Presence of an Ultra-Conserved Regulatory Element of the Genes Encoding Vacuolar-Type ATPase Subunits and Assembly Factors
Source: MDPI journal article supplement (doi:10.3390/biology12081127), 2023-08-13
Supplement: s1 [file s1]

| Gene Cluster ID              | Atp6v1C                                                |
|------------------------------|--------------------------------------------------------|
| Drosophila melanogaster gene | Vha44 (CG8048)                                         |
| Predicted function           | ATPase, H+ transporting, lysosomal 42kDa, V1 subunit C |

Atp6v1C CLEAR element conservation:

|       | 5'                                                         | 5' / intron1                                                              |
|-------|------------------------------------------------------------|---------------------------------------------------------------------------|
| Dmel\ | ACACTGGCGCCA <b>TCACGTGA</b> ATCTCGTGGGCA                  | ATCGAAAAACTG <b>TCATGTGA</b> CTGTCAACGAAC                                 |
| Mdom\ | CTGTGTCACTTA <b>TCACGTGA</b> ATTTCTTCTCCT                  | GATTCAAGCTTG <b>TCATGTGA</b> CTGTCATCTGTC                                 |
| Ccap\ | CTGCGAATGTTA <b>TCACGTGA</b> ATTTTGTACAT                   | GACCCAAAGCTG <b>TCATGTGA</b> CTGTCATCAAAC                                 |
| Gmor\ | -----                                                      | CGATCC <b>AAACTGTCATGTGA</b> CTTATC <b>ATCAAA</b>                         |
| Llon\ | -----                                                      | TAGG <b>AAAAATTTTCATGTGA</b> AA <b>TCATTCTT</b>                           |
| Ppap\ | -----                                                      | AAGATGGT <b>ATGTTCATGTGA</b> CG <b>CAAAAACT</b>                           |
| Agam\ | <b>CACCGAAAGCAATC</b> <b>ACGTGA</b> ATACGTTGTAAT           | <b>AAAAGGTAGATGTCATGTGA</b> CTTATCAGTTCA                                  |
| Aara\ | <b>CACCGAAAGCAATC</b> <b>ACGTGA</b> ATACGTTGTAAT           | <b>AAAAGGTAGATGTCATGTGA</b> CTTATCAGTTCA                                  |
| Aqan\ | <b>CACCGAAAGCAATC</b> <b>ACGTGA</b> ATACGTTGTAAT           | <b>AAAAGGTAGATGTCATGTGA</b> CTTATCAGTTCA                                  |
| Achr\ | <b>CTCCGAAAGCAATC</b> <b>ACGTGA</b> ATACGTTGTAAT           | <b>AAAAGGTAGATGTCATGTGA</b> CTTATCAGTTCA                                  |
| Aepi\ | <b>CTCCGAAAGCAATC</b> <b>ACGTGA</b> ATACGTTGTAAT           | <b>AAAAGGTGGATGTCATGTGA</b> CTTTATCAATT                                   |
| Amin\ | <b>CTCCGAAAGCAATC</b> <b>ACGTGA</b> ATACTGTAATGG           | <b>AAAAGGTAGACTGTCATGTGA</b> CTTATCAGTTCA                                 |
| Afun\ | <b>CTCCGAAAGCAATC</b> <b>ACGTGA</b> ATACTGTAATGG           | <b>AAAAGGTAGATGTCATGTGA</b> CTTATCAGTTCA                                  |
| Aste\ | <b>CTCCGAAAGCAATC</b> <b>ACGTGA</b> ATACTGTAAT             | <b>AAAAGGTAGATGTCATGTGA</b> CTTATCAGTTCA                                  |
| Adir\ | GCT <b>CGGAAGCAATC</b> <b>ACGTGA</b> ATACTTGTAA <b>ATG</b> | <b>AAAAGGTAGATGTCATGTGA</b> CTTATCAGTTCA                                  |
| Anil\ | AGAGGCTT <b>GCAATC</b> <b>ACGTGA</b> ATAATATGGTAA          | <b>AAAAGGTAGATGTCATGTGA</b> CTTATC <b>ATTCA</b>                           |
| Aalb\ | ACGAGCCGCA <b>ATC</b> <b>ACGTGA</b> ATTCTGTGA <b>AG</b>    | <b>GAAAAGATAGTGT</b> <b>TCATGTGA</b> CTTATC <b>ACACAA</b>                 |
| Adar\ | <b>CTTCTCGTGCAATC</b> <b>ACGTGA</b> ATCGAATTCGGA           | <b>GAAAAGATAGTGT</b> <b>TCATGTGA</b> CTTATC <b>ACACAA</b>                 |
| Aaeg\ | ACG <b>CAGAGACTGTC</b> <b>ACGTGA</b> ATTGCAATGGTG          | <b>AGGAAAAATATGT</b> <b>TCATGTGA</b> CTTATC <b>ATTCAA</b>                 |
| Cqui\ | ACA <b>CTTTGCTGT</b> <b>TCACGTGA</b> ATTGCAATGGTG          | <b>TTGAAAAATATGT</b> <b>TCATGTGA</b> CTTATC <b>AGTCAA</b>                 |
| Mdes\ | <b>TTATGTGA</b> AA <b>ATGTCACATGA</b> CACAA <b>ATGTTAA</b> | <b>CAATGGTAAATGT</b> <b>TCATGTGA</b> CTCACA <b>CAAAA</b>                  |
| Bmor\ | <b>GGCAGCACAGCGTC</b> <b>ACGTGA</b> ATTTTCATGGCG           |                                                                           |
| Msex\ | <b>GGCAGCACCGCATC</b> <b>ACGTGA</b> ATTTTCATGGCG           |                                                                           |
| Dple\ | <b>GGCAGCACGGCATC</b> <b>ACGTGA</b> ATTTTCATGGCG           |                                                                           |
| Hmel\ | <b>GGCAGCACAGCATC</b> <b>ACGTGA</b> ATTTTCATGGCG           |                                                                           |
| Pxyl\ | <b>GGCAGCACCGCATC</b> <b>ACGTGA</b> ATTTTCATGGCG           |                                                                           |
| Tcas\ | CAACATGTC <b>AAAATC</b> <b>ACGTGA</b> AACCCCACTAAG         | TGTCAATTGAAG <b>TCACATGA</b> TCGCCTTCAATT                                 |
| Dpon\ | ACAATTTGACAG <b>TCACGTGA</b> AAATAACGATCA                  | AGTTTAGTGTA <b>GTCA</b> <b>TGTGA</b> CTGTAGTAATGT                         |
| Amel\ | AACT <b>GTTC</b> <b>CAAAATC</b> <b>AGCTGA</b> TATTCCTTTGG  | <b>ACACAATTGT</b> <b>TCATC</b> <b>ACGTGA</b> ---GTC <b>ACAATG</b>         |
| Bter\ | <b>TCTGGTTCCAAATC</b> <b>AGC</b> <b>CGATGAT</b> TCTTTAG    | <b>ACACAATTGT</b> <b>TCATC</b> <b>ACGTGA</b> ---GTC <b>ACAATG</b>         |
| Bimp\ | <b>TCTGGTTCCAAATC</b> <b>AGCTGA</b> TGATTCTTTAG            | <b>ACACAATTGT</b> <b>TCATC</b> <b>ACGTGA</b> ---GTC <b>ACAATG</b>         |
| Aflo\ | AACGGTT <b>CCAAATC</b> <b>AGCTGA</b> TGATATCTCTT           | <b>ACACAATTGT</b> <b>TCATC</b> <b>ACGTGA</b> ---GTC <b>ACAATG</b>         |
| Mrot\ | GACAA <b>TTCC</b> <b>AAAGT</b> <b>CAGCTGA</b> TGATACTGTGGC | <b>ACACAATTGT</b> <b>TCATC</b> <b>ACGTGA</b> ---GTC <b>ACAATG</b>         |
| Lhum\ | CAGGTTCTTG <b>AGTC</b> <b>AGCTGA</b> TAAAGTITTAAT          | <b>ACACAATTGT</b> <b>TCATC</b> <b>ACGTGA</b> GAA <b>GTCA</b> <b>CGATG</b> |
| Cflo\ | <b>TCGAGTTACGAATC</b> <b>AGCTGA</b> CAATATTCAGTT           | <b>ACATAATTGT</b> <b>TCATC</b> <b>ACGTGA</b> GGAG <b>TCACA</b> <b>ATG</b> |
| Aech\ | <b>TCTTGATATGCCGTC</b> <b>AGCTGA</b> CGGCACGGCGTT          | <b>CGCAATCTGT</b> <b>TCATC</b> <b>ACGTGA</b> GCGG <b>TCACA</b> <b>ATG</b> |
| Acep\ | <b>TGCGTCGCGGAGTC</b> <b>AGCTGA</b> CGGCACGGCGTT           | <b>CGCAATCTGT</b> <b>TCATC</b> <b>ACGTGA</b> GTGG <b>TCACA</b> <b>ATG</b> |
| Pbar\ | <b>TGTACGCGGAGTC</b> <b>AGCTGA</b> CAGCACAGCGTT            | <b>CACAATCTGT</b> <b>TCATC</b> <b>ACGTGA</b> GTGG <b>TCACA</b> <b>ATG</b> |
| Sinv\ | TGTC <b>GCACGGAGTC</b> <b>AGCTGA</b> CGGCACGGCGG           | <b>CACAATCTGT</b> <b>TCATC</b> <b>ACGTGA</b> GCGG <b>TCACA</b> <b>ATG</b> |
| Hsal\ | TCGGGCG <b>CAAGTC</b> <b>AGCTGA</b> CGGCACAGTGTG           | <b>ACACAATTGT</b> <b>TCATC</b> <b>ACGTGA</b> GAGG <b>TCACA</b> <b>ATG</b> |
| Ngir\ | -----                                                      | <b>GCAGCACTCTTAT</b> <b>CACGTGA</b> GAGCGTG <b>CGTAT</b>                  |
| Nlon\ | -----                                                      | <b>GCAGCACTCTTAT</b> <b>CACGTGA</b> GAGCGTG <b>CGTAT</b>                  |
| Nvit\ | -----                                                      | <b>GCAGCACTCTTAT</b> <b>CACGTGA</b> GAGCGTG <b>CGTAT</b>                  |
| Phum\ | GGCAGCACATA <b>ATC</b> <b>ACGTGA</b> ATCGTTATGGTA          |                                                                           |
| Lful\ | GTCA <b>CCACCGAGTC</b> <b>ACGTGA</b> ATTGTAATGAAT          |                                                                           |
| Dpul\ | GGAA <b>ACCTTAGAT</b> <b>TCACATGA</b> CAGTCTCCTGAC         |                                                                           |

Atp6v1C gene structure comparison:

Legend: UTR region, CDS region, INTRON

| Order | Species | Atp6v1C orthologs | 5'exon | intron | exon | intron | exon3' | Extended CLEAR region | Position | bps from TSS |
|-------|---------|-------------------|--------|--------|------|--------|------|--------|------|--------|------|--------|------|--------|------|--------|--------|-----------------------|----------|--------------|
|-------|---------|-------------------|--------|--------|------|--------|------|--------|------|--------|------|--------|------|--------|------|--------|--------|-----------------------|----------|--------------|

|                            |                                  |                                            |     |       |     |               |      |     |       |     |      |                  |      |                  |      |     |      |     |       |     |      |                                                                          |                                                                      |                                                                       |                   |            |    |                                                                    |               |              |
|----------------------------|----------------------------------|--------------------------------------------|-----|-------|-----|---------------|------|-----|-------|-----|------|------------------|------|------------------|------|-----|------|-----|-------|-----|------|--------------------------------------------------------------------------|----------------------------------------------------------------------|-----------------------------------------------------------------------|-------------------|------------|----|--------------------------------------------------------------------|---------------|--------------|
| Diptera<br>(Drosophilidae) | <i>Drosophila_melanogaster</i>   | <a href="#">DmelVha44-RA</a>               | 148 | 3069  | 8   | 135           | 90   | 154 | 5873  | 187 | 64   | 99               | 62   | 256              | 62   | 98  | 59   | 139 | 70    | 99  | 1153 | acactggcgccaTCACGTGAatctgtgggca<br>atcgaaaactgTCATGTGAactgcaacgaac       | 5'<br>intron1                                                        | -40<br>565                                                            |                   |            |    |                                                                    |               |              |
| Diptera<br>(Muscidae)      | <i>Musca_domestica</i>           | <a href="#">MdomAtp6v1C</a>                | ND  | ND    | 11  | 132           | 68   | 154 | 13312 | 187 | 164  | 99               | 68   | 256              | 71   | 98  | 70   | 145 | 2264  | 99  | ND   | ctgtgtcacttaTCACGTGAaatttctctctc<br>gattcaagctgTCATGTGAactgcatctgtc      | 5'<br>intron1?                                                       | ND<br>ND                                                              |                   |            |    |                                                                    |               |              |
| Diptera<br>(Tephritidae)   | <i>Ceratitis_capitata</i>        | <a href="#">CcapAtp6v1C</a>                | 192 | 14748 | 11  | 132           | ND   | 154 | 18961 | 187 | 2027 | 99               | 93   | 256              | 1441 | 98  | 106  | 142 | 562   | 99  | ND   | ctcgaaatgtaTCACGTGAaattttgtacat<br>gacccaaagctgTCATGTGAactgcatcaaac      | 5'<br>intron1                                                        | -115<br>670                                                           |                   |            |    |                                                                    |               |              |
| Diptera<br>(Glossinidae)   | <i>Glossina_morsitans</i>        | <a href="#">GmorAtp6v1C<br/>TMP008641*</a> | 138 | 5966  | 11  | 132           | 72   | 154 | 10967 | 187 | 1138 | 99               | 82   | 256              | 77   | 98  | 56   | 139 | 81    | 99  | 239  | cgatccaaactgTCATGTGAacttatcatcaaa                                        | intron1                                                              | 531                                                                   |                   |            |    |                                                                    |               |              |
| Diptera<br>(Psychodidae)   | <i>Lutzomyia_longipalpis</i>     | <a href="#">LlonAtp6v1C</a>                |     |       | ND  | 286           |      |     | ND    | 187 | 85   | 99               | 1215 | 493              |      |     |      |     | 471   | 96  | ND   | taggaaaattTCATGTGAaattcatttctt                                           | intron1                                                              | ND                                                                    |                   |            |    |                                                                    |               |              |
|                            | <i>Phlebotomus_papatasi</i>      | <a href="#">PpapAtp6v1C</a>                |     |       | ND  | 286 (132+154) |      |     | ND    | 187 | ND   | 99               | 2288 | 493 (256+98+139) |      |     |      |     | ND    | 96  | ND   | aagatggtatgTCATGTGAactgcaaaaact                                          | intron1                                                              | ND                                                                    |                   |            |    |                                                                    |               |              |
| Diptera<br>(Culicidae)     | <i>Anopheles_gambiae</i>         | <a href="#">AgamAtp6v1C<br/>AGAP005845</a> | 279 | 869   | 28  | 132           | 102  | 154 | 4455  | 187 | 74   | 99               | 71   | 256              | 75   | 98  | 72   | 136 | 77    | 96  | 345  | caccgaaagcaaTCACGTGAatactgttgtaat<br>aaaaggtagatgTCATGTGAacttacagttica   | 5'UTR<br>intron1                                                     | 25<br>658                                                             |                   |            |    |                                                                    |               |              |
|                            | <i>Anopheles_arabiensis</i>      | <a href="#">AaraAtp6v1C</a>                |     |       | ND  | 132           | 101  | 154 | 4446  | 187 | 76   | 99               | 74   | 256              | 70   | 98  | 72   | 136 | 72    | 96  | ND   | caccgaaagcaaTCACGTGAatactgttgtaat<br>aaaaggtagatgTCATGTGAacttacagttica   | 5'UTR?<br>intron1?                                                   | >-1160<br>>-518                                                       |                   |            |    |                                                                    |               |              |
|                            | <i>Anopheles_quadriannulatus</i> | <a href="#">AqanAtp6v1C</a>                |     |       | ND  | 132           | 101  | 154 | 4415  | 187 | 80   | 99               | 73   | 256              | 71   | 98  | 72   | 136 | 74    | 96  | ND   | caccgaaagcaaTCACGTGAatactgttgtaat<br>aaaaggtagatgTCATGTGAacttacagttica   | 5'UTR?<br>intron1?                                                   | >-1155<br>>-514                                                       |                   |            |    |                                                                    |               |              |
|                            | <i>Anopheles_christyi</i>        | <a href="#">AchrAtp6v1C</a>                |     |       | ND  | 132           | 85   | 154 | 4227  | 187 | 81   | 99               | 93   | 256              | 74   | 98  | 75   | 136 | 69    | 96  | ND   | ctcggaaagcaaTCACGTGAatactgttgtaat<br>aaaaggtagatgTCATGTGAacttacagttica   | 5'UTR?<br>intron1?                                                   | >-1166<br>>-514                                                       |                   |            |    |                                                                    |               |              |
|                            | <i>Anopheles_epiroticus</i>      | <a href="#">AepiAtp6v1C</a>                |     |       | ND  | 135           | 69   | 154 | 4993  | 187 | 73   | 99               | 80   | 256              | 67   | 98  | 76   | 136 | 62    | 96  | ND   | ctcggaaagcaaTCACGTGAatactgttgtaat<br>aaaaggtgtagTCATGTGAactttatcaatt     | 5'UTR?<br>intron1?                                                   | >-1135<br>>-504                                                       |                   |            |    |                                                                    |               |              |
|                            | <i>Anopheles_minimus</i>         | <a href="#">AminAtp6v1C</a>                |     |       | ND  | 132           | 84   | 154 | 4210  | 187 | 65   | 99               | 75   | 256              | 72   | 98  | 69   | 136 | 63    | 96  | ND   | ctcggaaagcaaTCACGTGAatactgtaatgg<br>aaaggtagactgTCATGTGAacttacagttica    | 5'UTR?<br>intron1?                                                   | >-1137<br>>-485                                                       |                   |            |    |                                                                    |               |              |
|                            | <i>Anopheles_funestus</i>        | <a href="#">AfunAtp6v1C</a>                |     |       | ND  | 132           | 93   | 154 | 4498  | 187 | 73   | 99               | 79   | 256              | 87   | 98  | 74   | 136 | 72    | 96  | ND   | ctcggaaagcaaTCACGTGAatactgtaatgg<br>aaaaggtagactgTCATGTGAacttacagttica   | 5'UTR?<br>intron1?                                                   | >-1108<br>>-469                                                       |                   |            |    |                                                                    |               |              |
|                            | <i>Anopheles_stephensi</i>       | <a href="#">AsteAtp6v1C</a>                |     |       | ND  | 132           | 77   | 154 | ND    | 187 | ND   | 99               | 65   | 256              | 73   | 98  | 90   | 136 | ND    | 96  | ND   | ctcggaaagcaaTCACGTGAatactgttgtaat<br>aaaaggtagactgTCATGTGAacttacagttica  | 5'UTR?<br>intron1?                                                   | ND                                                                    |                   |            |    |                                                                    |               |              |
|                            | <i>Anopheles_dirus</i>           | <a href="#">AdirAtp6v1C</a>                |     |       | ND  | 132           | 68   | 154 | 3912  | 187 | 68   | 99               | 73   | 256              | 57   | 98  | 347  | 136 | 71    | 96  | ND   | gtctggaaagcaaTCACGTGAatactgtgtaatg<br>aaaaggtagactgTCATGTGAacttacagttica | 5'UTR?<br>intron1?                                                   | >-1111<br>>-478                                                       |                   |            |    |                                                                    |               |              |
|                            | <i>Anopheles_nili</i>            | <a href="#">AnilAtp6v1C</a>                |     |       | ND  | 132           | 78   | 154 | ND    | 187 | 86   | 99               | 69   | 256              | 66   | 98  | 73   | 136 | 67    | 96  |      | agagccttgcaaTCACGTGAataatattggttaa<br>aaaaggtagactgTCATGTGAacttacatttca  | 5'UTR?<br>intron1?                                                   | >-1108<br>>-500                                                       |                   |            |    |                                                                    |               |              |
|                            | <i>Anopheles_albimanus</i>       | <a href="#">AalbAtp6v1C</a>                |     |       | ND  | 132           | 79   | 154 | 3054  | 187 | 76   | 99               | 75   | 256              | 67   | 98  | 76   | 136 | 77    | 96  | ND   | acgagccgcgcaaTCACGTGAattctgtggaag<br>gaaaagatagtgTCATGTGAacttacacacaa    | 5'UTR?<br>intron1?                                                   | >-923<br>>-337                                                        |                   |            |    |                                                                    |               |              |
|                            | <i>Anopheles_darlingi</i>        | <a href="#">AdarAtp6v1C</a>                |     |       | ND  | 132           | 78   | 154 | 3189  | 187 | 73   | 99               | 70   | 256              | 73   | 98  | 71   | 136 | 77    | 96  | ND   | cttcctgtcaaTCACGTGAatcgaaatggga<br>gaaaagatagtgTCATGTGAacttacacacaa      | 5'UTR?<br>intron1?                                                   | >-946<br>>-367                                                        |                   |            |    |                                                                    |               |              |
|                            | <i>Aedes_aegypti</i>             | <a href="#">AaegAtp6v1C<br/>AAEL005173</a> | 215 | 7535  | 60  | 132           | 65   | 154 | 9933  | 187 | 56   | 99               | 55   | 256              | 62   | 98  | 66   | 136 | 10450 | 96  | 593  | acgcagagactgTCACGTGAaattgcaattggtg<br>aggaaaaaatgTCATGTGAacttacatcnaa    | 5'UTR<br>intron1                                                     | 7<br>632                                                              |                   |            |    |                                                                    |               |              |
|                            | <i>Culex_pipiens_qui.</i>        | <a href="#">CquiAtp6v1C<br/>CPU002067</a>  |     |       | 58  | 132           | 55   | 154 | 2686  | 187 | 63   | 99               | 220  | 256 (124+132)    | 56   | 98  | 64   | 136 | 64    | 96  | ND   | acacttggctgTCACGTGAaattgcaattggtg<br>ttgaaaaatgTCATGTGAacttacatcnaa      | 5'UTR?<br>intron1?                                                   | ND<br>ND                                                              |                   |            |    |                                                                    |               |              |
| Diptera<br>(Cecidomyiidae) | <i>Mayetiola_destructor</i>      | <a href="#">MdesAtp6v1C</a>                | 121 | 3731  | 186 | 132           | ND   | 154 | 14525 | 187 | 100  | 99               | 76   | 124              | 96   | 132 | 173  | 98  | 128   | 136 | 721  | 96                                                                       | ND                                                                   | ttatgtgaaatgTCACATGAcacaaatgttaa<br>caatggtgaaatgTCATGTGAactcaacacaaa | 5'UTR?<br>intron1 | -66<br>949 |    |                                                                    |               |              |
| Lepidoptera                | <i>Bombyx_mori</i>               | <a href="#">BmorAtp6v1C</a>                |     |       | 250 | 129           | 1316 | 102 | 744   | 52  | 7172 | 98               | 1143 | 89               | 556  | 99  | 1370 | 124 | 853   | 132 | 1681 | 98                                                                       | 1369                                                                 | 139                                                                   | 940               | 99         | 31 | ggcagcacagcTCACGTGAattttcatggcg<br>atcgttaacctTCACATGAagaacagctgtg | 5'<br>intron1 | -286<br>1267 |
|                            | <i>Manduca sexta</i>             | <a href="#">MsexAtp6v1C</a>                |     |       | ND  | 129           | 1581 | 102 | 328   | 52  | ND   | 98               | 266  | 89               | 267  | 99  | 99   | 124 | ND    | 132 | 321  | 98                                                                       | 250                                                                  | 139                                                                   | 505               | 96         | ND | ggcagcacccgaTCACGTGAattttcatggcg                                   | 5'            | >-541        |
|                            | <i>Danaus_plexippus</i>          | <a href="#">DpleAtp6v1C</a>                |     |       | ND  | 129           | 996  | 102 | 427   | 52  | 3233 | 98               | 346  | 89               | 531  | 99  | 415  | 124 | 339   | 132 | 286  | 98                                                                       | 586                                                                  | 139                                                                   | 251               | 93         | ND | ggcagcacggcaTCACGTGAattttcatggcg                                   | 5'            | >-537        |
|                            | <i>Heliconius_melpomene</i>      | <a href="#">HmelAtp6v1C</a>                |     |       | ND  | 129           | 853  | 102 | 481   | 52  | 5651 | 98               | 874  | 89               | 240  | 99  | 120  | 124 | 837   | 132 | 321  | 98                                                                       | 425                                                                  | 139                                                                   | 1281              | 96         | ND | ggcagcacagcaTCACGTGAattttcatggcg                                   | 5'            | >-544        |
|                            | <i>Plutella_xylostella</i>       | <a href="#">PxylAtp6v1C</a>                |     |       | ND  | 129           | 414  | 102 | 430   | 52  | 6248 | 98               | 363  | 89               | 513  | 99  | 508  | 124 | 711   | 132 | 596  | 98                                                                       | 693                                                                  | 136                                                                   | 721               | 96         | ND | ggcagcacccgaTCACGTGAattttcatggcg                                   | 5'            | >-568        |
| Strepsiptera               | <i>Mengenilla_moldrzyki</i>      | <a href="#">MmolAtp6v1C</a>                |     |       | ND  | 132           | ND   | 154 | 1478  | 187 | ND   | 99               | 59   | 256              | 994  | 240 |      |     | 52    | 96  | ND   | ND                                                                       |                                                                      |                                                                       |                   |            |    |                                                                    |               |              |
| Coleoptera                 | <i>Tribolium_castaneum</i>       | <a href="#">TeasAtp6v1C<br/>LOC661302</a>  | 81  | 414   | 33  | 132           | 46   | 154 | 2617  | 187 | 50   | 355 (99+124+132) |      |                  |      | 54  | 98   | 75  | 136   | 49  | 99   | 572                                                                      | caaatgtcaaaTCACGTGAaaccccaactaag<br>tgtcaattgaagTCACATGAatgccttcaatt | 5'UTR?<br>intron1                                                     | 1<br>418          |            |    |                                                                    |               |              |
|                            | <i>Dendroctonus_ponderosae</i>   | <a href="#">DponAtp6v1C</a>                | 78  | 601   | 46  | 132           | 871  | 154 | ND    | 187 | 84   | 99               | 65   | 124              | 69   | 132 | 588  | 98  | 61    | 136 | 513  | 99                                                                       | 182                                                                  | acaattgacagTCACGTGAaaaatacagcata<br>agtttagttagTCATGTGAactgtagtaagt   | 5'UTR?<br>intron1 | -5<br>497  |    |                                                                    |               |              |
| Hymenoptera                | <i>Apis_mellifera</i>            | <a href="#">AmelAtp6v1C</a>                | 170 | 1039  | 36  | 286           |      |     | 6348  | 187 | 120  | 99               | 71   | 209              | 149  | 145 | 108  | 145 | 105   | 96  | ND   | aactgttccaaaTCAGCTGAatttcccttgg<br>acacaattgtcaTCACGTGAaggtcacaatgt      | 5'<br>5'UTR                                                          | -22<br>42                                                             |                   |            |    |                                                                    |               |              |

[illegible]
