# Supplementary material for: Structural and Comparative Analyses of Insects Suggest the Presence of an Ultra-Conserved Regulatory Element of the Genes Encoding Vacuolar-Type ATPase Subunits and Assembly Factors
Source: MDPI journal article supplement (doi:10.3390/biology12081127), 2023-08-13
Supplement: s1 [file s1]

| Gene Cluster ID                     | Atp6v0e                               |                                   |
|-------------------------------------|---------------------------------------|-----------------------------------|
| Drosophila melanogaster gene        | VhaM9.7-b (CG7625)                    |                                   |
| FlyBase ID                          | <a href="#">FBgn0028663</a>           |                                   |
| Predicted function                  | ATPase, H+ transporting, V0 subunit e |                                   |
| Atp6v0e CLEAR element conservation: |                                       |                                   |
|                                     | <u>5' / 5' UTR</u>                    | <u>5' / 5' UTR</u>                |
| Dmel\                               | GGGACATGTCCGTCATGTGATATTCGTTGCTC      |                                   |
| Mdom\                               | cattatatttaaTCATGTGAcacacgacgaca      |                                   |
| Ccap\                               | tcccatgggtgaTCATGTGAcatttgcgtagc      |                                   |
| Gmor\                               | gctctttacgcaTCATGTGAtaattagtaatt      |                                   |
| Llon\                               | aacgatttcgggGCACATGAcgtgtgacgtca      |                                   |
| Ppap\                               | gaaacaaaatagTCATATGAttaatcgaccga      |                                   |
| Agam\                               | -----                                 | CCGTGTACGCCTGTTCATGTGATATTTTCTCAT |
| Aara\                               | -----                                 | CCGTGTACGCCTGTTCATGTGATATTTTCTCAT |
| Aqan\                               | -----                                 | CCGTGTACGCCTGTTCATGTGATATTTTCTCAT |
| Achr\                               | -----                                 | TGCTTGTGACTGTTCATGTGATATTTTCTCTT  |
| Aepi\                               | -----                                 | TGTTCTGCTCTGTTCATGTGATATTTTCTCTT  |
| Amin\                               | -----                                 | TGTTCTGGTCTGTTCATGTGATATTTTCTCTT  |
| Afun\                               | -----                                 | TGTTCTGGTCTGTTCATGTGATATTTTCTCTT  |
| Aste\                               | -----                                 | GTCCGTGGTCTGTTCATGTGATATTTTCTCTT  |
| Adir\                               | -----                                 | TGTTCTTGTCTGTTCATGTGATATTTTCTGCC  |
| Anil\                               | -----                                 | TGGTACAAGCTGTTCATGTGATGTTTCTCTG   |
| Aalb\                               | -----                                 | ACGTCACGTCTGTTCATGTGATGTTTCTCTTC  |
| Adar\                               | -----                                 | ACGTCACGGCTGTTCATGTGATGTTTCTCTTC  |
| Cqui\                               | GCGTTTGAAACGTCACATGATGAGTGACGCGT      | CACCCGAACCTGTTCATGTGATATTTTCTCAC  |
| Aaeg\                               | CCACCAAGGACGTCACATGATGACTCACTCA       | CACCGAGACCTGTTCATGTGATTATTATTCTT  |
| Mdes\                               | -----                                 | GCGCGCTCACTGTTCATGTGATTGTCATGAGAA |
| Bmor\                               | TATCTATGACAGTCATATGACTCTCGGTGACA      |                                   |
| Msex\                               | -----                                 |                                   |
| Hmel\                               | ATCCGATAATTGTCATATGACTACGACATTCA      |                                   |
| Dple\                               | CCGATTCTCATGTCATATGACTGCCAATGTTTC     |                                   |
| Pxyl\                               | ATTCTACGAATGTCATATGACTTAAACAGTG       |                                   |
| Tcas\                               | GTCCTGTGCGCATCATATGACTTTGACACTTC      |                                   |
| Dpon\                               | TCCCCTACCTAGTCATATGATTTTGACGTCTA      |                                   |
|                                     |                                       | <u>intron2</u>                    |
|                                     |                                       | GTTCAATCGGAAACACATGACAACAAACACTA  |
|                                     |                                       | TTCTGTTACTAGTCATGTGATTAAATTATGGG  |
| Amel\                               | AAATCGAATATTCACGTGATTACATTTACT        | -----                             |
| Aflo\                               | AAATCGAGATATTCACGTGATTACGATTACT       | -----                             |
| Bter\                               | AAATCGAGATATTCACGTGACTCTCATTTACA      | -----                             |
| Bimp\                               | AAATCGAGATATTCACGTGACTCCCATTTACA      | -----                             |

Mrot\ GAACTGAGCGCTTCACGTGATCTGTTTGTGTC -----  
Aech\ CAATCGATGTGTCACGTGAATAGTACAAAGA ACAAAGAATCTCTCATGTGATCCTTTCGATAC  
Acep\ CAATCGATGTGTCACGTGAATAGTACAAAGA ACAAAGAATCTCTCATGTGATCCTTTCATAC  
Cflo\ TAATCGATGTA-TCACGTGAACAATACGAAGA ACGAAGATTCTCTCATGTGATCCTCCCAGTTT  
Pbar\ AGATCAATGTGTCACGTGAACAGTACGAAGA ACGAAGATTCTCTCATGTGATCCTTCCAGTTT  
Sin\ TGATCGATGTGTCACGTGAATGGTACGAGGA ACGAGGAGTCTCTCATGTGATTCTTTCGTATAT  
Lhum\ GAATCGATATGTCACGTGAATCAGGCGAAGG GCGAAGGTACTCTCATGTGATCCTCCCAGTTT  
Hsal\ GAATCGATATA-TCACGTGAAGATCTCTCATG CGTGAAGATCTCTCATGTGATCCTTCCCGTTT  
  
Ngir\ ----- TGCGCATGTTTCA TCATGTGACAGAAAGCAGAC  
Nlon\ ----- TGCGCATGTTTCA TCATGTGACAGAAAGCAGAC  
Nvit\ ----- TGCGCATGTTTCA TCATGTGACAGAAAGCAGAC  
  
Lful\ ----- tttctagtaata TCATGTGAtccgttcgcaga tgtaattatcgtTCATATGAaagttttaatta  
  
Phum\ aaatattttgaa TCACATGA tttcgtctgctt  
Dpul\ caaagtttagctg TCACATGA cacaagatatct

### Atp6v0e gene structure comparisons:

(Click on orthologs for genomic, mRNA and protein sequence informations)

Key: UTR region, CDS region

| Order                   | Species                          | Atp6v0e orthologs                                          | 5'exon |    | intron | exon | intron | exon3' |     | Extended CLEAR region                                               | Position      | bps from TSS |
|-------------------------|----------------------------------|------------------------------------------------------------|--------|----|--------|------|--------|--------|-----|---------------------------------------------------------------------|---------------|--------------|
| Diptera (Drosophilidae) | <i>Drosophila_melanogaster</i>   | <a href="#">Dmel\VhaM9.7-b</a>                             | 142    | 95 | 70     | 48   | 68     | 127    | 303 | gggacatgccgTCATGTGAtattcgttgctc                                     | 5'UTR         | 38           |
| Diptera (Muscidae)      | <i>Musca_domestica</i>           | <a href="#">Mdom\Atp6v0e</a>                               |        | 95 | 96     | 48   | 74     | 130    |     | cattatatttaaTCATGTGAcacacgacgaca                                    | 5'UTR?        | >-144        |
| Diptera (Tephritidae)   | <i>Ceratitis_capitata</i>        | <a href="#">Ccap\Atp6v0e</a>                               | 134    | 95 | 81     | 48   | 61     | 130    | 363 | tcccatgggtgaTCATGTGAcatttcgctagc                                    | 5'UTR?        | -24          |
| Diptera (Glossinidae)   | <i>Glossina_morsitans</i>        | <a href="#">Gmor\Atp6v0e</a><br><a href="#">TMP002992</a>  |        | 95 | 57     | 48   | 77     | 145    |     | gctctttacgcaTCATGTGAtaattagtaatt                                    | 5'UTR?        | >-83         |
| Diptera (Psychodidae)   | <i>Lutzomyia_longipalpis</i>     | <a href="#">Llon\Atp6v0e</a>                               | 116    | 98 | 90     | 48   | 66     | 148    |     | aacgatttcgggGCACATGAcgtgtgacgtca                                    | 5'UTR         | 22           |
|                         | <i>Phlebotomus_papatasi</i>      | <a href="#">Ppap\Atp6v0e</a>                               | 26     | 98 | 71     | 48   | 59     | 145    |     | gaaacaaaatagTCATATGAttaatcgaccga<br>aattctcacctTCACGTGAtttttcttacag | 5'<br>intron1 | >-32<br>>176 |
| Diptera (Culicidae)     | <i>Anopheles_gambiae</i>         | <a href="#">Agam\Atp6v0e</a><br><a href="#">AGAP003588</a> | 129    | 98 | 91     | 48   | 76     | 142    | 440 | cctgtacgcctgTCATGTGAtattttctcat                                     | 5'UTR         | 6            |
|                         | <i>Anopheles_arabiensis</i>      | <a href="#">Aara\Atp6v0e</a>                               |        | 98 | 85     | 48   | 77     | 142    |     | cctgtacgcctgTCATGTGAtattttctcat                                     | 5'UTR?        | >-123        |
|                         | <i>Anopheles_quadriannulatus</i> | <a href="#">Aqan\Atp6v0e</a>                               |        | 98 | 86     | 48   | 76     | 142    |     | cctgtacgcctgTCATGTGAtattttctcat                                     | 5'UTR?        | >-124        |

|                            |                                |                                                            |         |    |     |    |      |     |      |    |                                                                       |                                                                                                           |                     |                  |
|----------------------------|--------------------------------|------------------------------------------------------------|---------|----|-----|----|------|-----|------|----|-----------------------------------------------------------------------|-----------------------------------------------------------------------------------------------------------|---------------------|------------------|
|                            | <i>Anopheles_christyi</i>      | <a href="#">Achr\Atp6v0e</a>                               |         | 98 | 64  | 48 | 77   | 142 |      |    | tgcttgtagctgTCATGTGAtatttttctctt                                      | 5'UTR?                                                                                                    | >-123               |                  |
|                            | <i>Anopheles_epiroticus</i>    | <a href="#">Aepi\Atp6v0e</a>                               |         | 98 | 74  | 48 | 78   | 142 |      |    | tgttctgctctgTCATGTGAtatttttctctt                                      | 5'UTR?                                                                                                    | >-105               |                  |
|                            | <i>Anopheles_minimus</i>       | <a href="#">Amin\Atp6v0e</a>                               |         | 98 | 78  | 48 | 90   | 142 |      |    | tgttctggctgTCATGTGAtatttttctctt                                       | 5'UTR?                                                                                                    | >-112               |                  |
|                            | <i>Anopheles_funestus</i>      | <a href="#">Afun\Atp6v0e</a>                               |         | 98 | 74  | 48 | 87   | 142 |      |    | tgttctggctgTCATGTGAtatttttctctt                                       | 5'UTR?                                                                                                    | >-110               |                  |
|                            | <i>Anopheles_stephensi</i>     | <a href="#">Aste\Atp6v0e</a>                               |         | 98 | 79  | 48 | 75   | 142 |      |    | gtccgtggctgTCATGTGAtatttttctctt                                       | 5'UTR?                                                                                                    | >-119               |                  |
|                            | <i>Anopheles_dirus</i>         | <a href="#">Adir\Atp6v0e</a>                               |         | 98 | 70  | 48 | 80   | 145 |      |    | tgttctgtctgTCATGTGAtatttttctgcc                                       | 5'UTR?                                                                                                    | >-120               |                  |
|                            | <i>Anopheles_nili</i>          | <a href="#">Anil\Atp6v0e</a>                               |         | 98 | 74  | 48 | 74   | 142 |      |    | tggtacaagctgTCATGTGAgtttttctctg                                       | 5'UTR?                                                                                                    | >-119               |                  |
|                            | <i>Anopheles_albimanus</i>     | <a href="#">Aalb\Atp6v0e</a>                               |         | 98 | 91  | 48 | 91   | 136 |      |    | acgtcactgctgTCATGTGAgtttttctctc                                       | 5'UTR?                                                                                                    | >-116               |                  |
|                            | <i>Anopheles_darlingi</i>      | <a href="#">Adar\Atp6v0e</a>                               |         | 98 | 86  | 48 | 85   | 133 |      |    | acgtcacggctgTCATGTGAgtttttctctc                                       | 5'UTR?                                                                                                    | >-122               |                  |
|                            | <i>Aedes_aegypti</i>           | <a href="#">Aaeg\Atp6v0e</a><br><a href="#">AAEL010819</a> | 48+82+5 | 98 | 70  | 48 | 4734 | 151 | 674  |    | ccaccaaggacgTCACATGAgtgactcactca<br>caccgagacctgTCATGTGAtattattttct   | 5'<br>5'UTR                                                                                               | -26<br>4            |                  |
|                            | <i>Culex_pipiens_qui.</i>      | <a href="#">Cqui\Atp6v0e</a><br><a href="#">CPIJ013144</a> |         | 98 | 91  | 48 | 71   | 148 | 422  |    | gcgtttgaaacgTCACATGAgtgagtcacgcgt<br>caccggaacctgTCATGTGAtatttttctcac | 5'<br>5'                                                                                                  | >-129<br>>-173      |                  |
| Diptera<br>(Cecidomyiidae) | <i>Mayetiola_destructor</i>    | <a href="#">Mdes\Atp6v0e</a>                               |         | 92 | 82  | 48 | 90   | 145 |      |    | gcgcgctcactgTCATGTGAattgcatgagaa                                      | 5'UTR?                                                                                                    | >-164               |                  |
|                            |                                |                                                            |         |    |     |    |      |     |      |    |                                                                       |                                                                                                           |                     |                  |
| Lepidoptera                | <i>Bombyx_mori</i>             | <a href="#">Bmor\Atp6v0e</a>                               | 84      | 98 | 83  | 48 | 1579 | 88  | ND   | 30 | 449                                                                   | tatctatgacagTCATATGActctcggtgaca                                                                          | 5'                  | >-26             |
|                            | <i>Manduca sexta</i>           | <a href="#">Msex\Atp6v0e</a>                               |         | ND | ND  | ND | ND   | 88  | 7377 | 33 | 351                                                                   | ND                                                                                                        |                     |                  |
|                            | <i>Danaus_plexippus</i>        | <a href="#">Dple\Atp6v0e</a>                               |         | 98 | 68  | 48 | 476  | 88  | ND   | ND |                                                                       | ccgattctcatgTCATATGActgccaatgttc                                                                          | 5'                  | >-109            |
|                            | <i>Heliconius_melpomene</i>    | <a href="#">Hmel\Atp6v0e</a>                               |         | 98 | 74  | 48 | 873  | 88  | ND   | ND |                                                                       | atccgataattgTCATATGActacgacattca                                                                          | 5'                  | >-102            |
|                            | <i>Plutella_xylostella</i>     | <a href="#">Pxy\Atp6v0e</a>                                | 35      | 98 | 88  | 48 | 965  | 88  | 3949 | 24 |                                                                       | attctacgaatgTCATATGActtaaaaacagtg<br>tagttaatgtgcTCACATGAtggtcataagtc                                     | 5'<br>intron2       | -67<br>447       |
|                            |                                |                                                            |         |    |     |    |      |     |      |    |                                                                       |                                                                                                           |                     |                  |
| Strepsiptera               | <i>Mengenilla_moldrzyki</i>    | <a href="#">Mmol\Atp6v0e</a>                               |         | 98 | 45  | 48 | 49   | 88  | 57   | 21 |                                                                       | ND                                                                                                        |                     |                  |
| Coleoptera                 | <i>Tribolium_castaneum</i>     | <a href="#">Tcas\Atp6v0e</a><br><a href="#">LOC662403</a>  | 79      | 98 | 61  | 48 | 46   | 88  | 53   | 18 | 140                                                                   | gtcctgtgcgcaTCATATGActttgacacttc<br>gttcaatcggaTCACATGAcaacaacacta                                        | 5'<br>intron2       | -17<br>322       |
|                            | <i>Dendroctonus_ponderosae</i> | <a href="#">Dpon\Atp6v0e</a>                               | 81      | 98 | 61  | 48 | 678  | 88  | 133  | 27 | 272                                                                   | tcgttgaatcgaTCACGTGAatgacaactccc<br>tcccctacctagTCATATGAttttgacgteta<br>ttctgttactagTCATGTGAttaaaattatggg | 5'<br>5'<br>intron2 | -27<br>-6<br>326 |
|                            |                                |                                                            |         |    |     |    |      |     |      |    |                                                                       |                                                                                                           |                     |                  |
| Hymenoptera                | <i>Apis_mellifera</i>          | <a href="#">Amel\Atp6v0e</a><br><a href="#">GB18948</a>    | 103     | 98 | 154 | 48 | 86   | 88  | 105  | 36 | 585                                                                   | aaatcgaaatatTCACGTGAatcacatttact                                                                          | 5'UTR               | 20               |
|                            | <i>Apis_florea</i>             | <a href="#">Aflo\Atp6v0e</a>                               |         | 98 | 151 | 48 | 77   | 88  | 101  | 42 |                                                                       | aaatcgagatatTCACGTGAatcacgattact                                                                          | 5'                  | >-74             |

|              |                               |                                                              |     |     |       |    |       |     |      |    |     |  |                                                                      |               |                |
|--------------|-------------------------------|--------------------------------------------------------------|-----|-----|-------|----|-------|-----|------|----|-----|--|----------------------------------------------------------------------|---------------|----------------|
|              | <i>Bombus_terrestris</i>      | <a href="#">Bter\Atp6v0e</a>                                 | 192 | 98  | 128   | 48 | 81    | 88  | 107  | 24 | 375 |  | aaatcgagataTCACGTGActctcatttaca                                      | 5'UTR         | 100            |
|              | <i>Bombus_impatiens</i>       | <a href="#">Bimp\Atp6v0e</a>                                 |     | 98  | 123   | 48 | 80    | 88  | 103  | 24 |     |  | aaatcgagataTCACGTGActcccatttaca                                      | 5'UTR?        | >-84           |
|              | <i>Megachile_rotundata</i>    | <a href="#">Mrot\Atp6v0e</a>                                 |     | 98  | 173   | 48 | 74    | 88  | 94   | 21 |     |  | gaactgagcgctTCACGTGAtctgtttgtgtc                                     | 5'            | >-82           |
|              | <i>Acromyrmex_echinatior</i>  | <a href="#">Aech\Atp6v0e</a>                                 |     | 107 | 261   | 48 | 76    | 88  | 181  | 18 |     |  | tcaatcgatgtgTCACGTGAatagtacaaaga<br>acaaagaatctcTCATGTGAtcctttcgatac | 5'<br>5'      | >-121<br>>-96  |
|              | <i>Atta_cephalotes</i>        | <a href="#">Acep\Atp6v0e</a>                                 |     | 107 | 268   | 48 | 82    | 88  | 169  | 21 |     |  | tcaatcgatgtgTCACGTGAatagtacaaaga<br>acaaagaatctcTCATGTGAtcctttcaatac | 5'<br>5'      | >-113<br>>-88  |
|              | <i>Solenopsis_invicta</i>     | <a href="#">Sinv\Atp6v0e</a>                                 | 122 | 107 | 254   | 48 | 82    | 88  | 285  | 21 | 139 |  | gtgatcgatgtgTCACGTGAatgtgtacgagga<br>acgaggagtctcTCATGTGAtctttcgttat | 5'<br>5'UTR   | -14<br>13      |
|              | <i>Camponotus_floridanus</i>  | <a href="#">Cflo\Atp6v0e</a>                                 |     | 107 | 244   | 48 | 84    | 88  | 64   | 21 |     |  | ttaatcgatgtaTCACGTGAacaatacgaaga<br>acgaagattctcTCATGTGAtcctccagttt  | 5'<br>5'      | >-132<br>>-107 |
|              | <i>Harpegnathos_saltator</i>  | <a href="#">Hsal\Atp6v0e</a>                                 |     | 98  | 283   | 48 | 81    | 88  | 161  | 24 |     |  | cgaatcgatataTCACGTGAagatctcTCATGTGAtccttccgttt                       | 5'            | >-108          |
|              | <i>Pogonomyrmex_barbatus</i>  | <a href="#">Pbar\Atp6v0e</a>                                 |     | 107 | 474   | 48 | 83    | 88  | 165  | 21 |     |  | cagatcaatgtgTCACGTGAacagtacgaaga<br>acgaagattctcTCATGTGAtcctccagttt  | 5'<br>5'      | >-131<br>>-106 |
|              | <i>Linepithema_humile</i>     | <a href="#">Lhum\Atp6v0e</a>                                 |     | 107 | 261   | 48 | 87    | 88  | 161  | 21 |     |  | cgaatcgatatgTCACGTGAatcaggcgaagg<br>gcgaaggactcTCATGTGAtcctccagttt   | 5'<br>5'      | >-136<br>>-111 |
|              | <i>Nasonia_giraulti</i>       | <a href="#">Ngir\Atp6v0e</a>                                 |     | 98  | 99    | 48 | 76    | 88  | 222  | 33 |     |  | tgcgcatgttcaTCATGTGAcagaaagcagac                                     | 5'            | >-83           |
|              | <i>Nasonia_longicornis</i>    | <a href="#">Nlon\Atp6v0e</a>                                 |     | 98  | 99    | 48 | 76    | 88  | 221  | 33 |     |  | tgcgcatgttcaTCATGTGAcagaaagcagac                                     | 5'            | >-83           |
|              | <i>Nasonia_vitripennis</i>    | <a href="#">Nvit\Atp6v0e</a><br><a href="#">NV10516</a>      | 25  | 98  | 99    | 48 | 73    | 88  | 223  | 33 |     |  | tgcgcatgttcaTCATGTGAcagaaagcagac                                     | 5'            | >-59           |
|              |                               |                                                              |     |     |       |    |       |     |      |    |     |  |                                                                      |               |                |
| Hemiptera    | <i>Acyrtosiphon_pisum</i>     | <a href="#">Apis\Atp6v0e</a><br><a href="#">LOC100571036</a> | 440 | 98  | 67    | 48 | 2880  | 88  | 65   | 18 |     |  | tactaccacgTCATATGAttgccgtcaa                                         | intron 2      | 2344           |
|              | <i>Rhodnius_prolixus</i>      | <a href="#">Rpro\Atp6v0e</a>                                 |     | 98  | 71    | 48 | 140   | 88  | 1483 | 30 |     |  | ND                                                                   |               |                |
| Phthiraptera | <i>Pediculus_humanus</i>      | <a href="#">Phum1Atp6v0e</a><br><a href="#">PHUM238330</a>   |     | 98  | 70    | 48 | 124   | 94  |      |    |     |  | aaatatttgaaTCACATGAttcgtctgctt                                       | 5'            | >-99           |
| Odonata      | <i>Ladona_fulva</i>           | <a href="#">Lful\Atp6v0e</a>                                 |     | 98  | 69    | 48 | 286   | 88  | 63   | 33 |     |  | tttctagtaataTCATGTGAtccgttcgcaga<br>tgtaattatcgTCATATGAaagttttaatta  | 5'<br>intron2 | >-49<br>>260   |
| Crustacea    | <i>Daphnia_pulex</i>          | <a href="#">Dpul\Atp6v0e</a>                                 | 107 | 98  | 70    | 48 | 210   | 109 |      |    | 108 |  | caaagttagctgTCACATGAcacaagatatct                                     | 5'            | -1             |
| Aracnida     | <i>Ixodes_scapularis</i>      | <a href="#">Isca\Atp6v0e</a><br><a href="#">ISCW018653</a>   |     | 98  | 57    | 48 | 63    | 94  |      |    |     |  | ND                                                                   |               |                |
|              |                               |                                                              |     |     |       |    |       |     |      |    |     |  |                                                                      |               |                |
|              | <i>Homo_sapiens</i>           | <a href="#">ATP6V0E1</a>                                     |     | 104 | 10810 | 48 | 24415 | 94  |      |    | 36  |  |                                                                      |               |                |
| Cnidaria     | <i>Nematostella_vectensis</i> | <a href="#">NEMVEDRAFT_v1g192225</a>                         | 18  | 113 | 318   | 48 | 1144  | 106 |      |    | 17  |  |                                                                      |               |                |
| Placozoa     | <i>Trichoplax_adhaerens</i>   | <a href="#">TRIADDRAFT_63123</a>                             | 16  | 98  | 989   | 48 | 148   | 106 |      |    | 15  |  |                                                                      |               |                |
|              |                               |                                                              |     |     |       |    |       |     |      |    |     |  |                                                                      |               |                |

|  |
|--|
|  |
|  |
|  |
|  |
