# Supplementary material for: Structural and Comparative Analyses of Insects Suggest the Presence of an Ultra-Conserved Regulatory Element of the Genes Encoding Vacuolar-Type ATPase Subunits and Assembly Factors
Source: MDPI journal article supplement (doi:10.3390/biology12081127), 2023-08-13
Supplement: s1 [file s1]

| Gene Cluster ID                     | Atp6v1D                                                         |                                         |
|-------------------------------------|-----------------------------------------------------------------|-----------------------------------------|
| Drosophila melanogaster gene        | Vha36-1 (CG8186)                                                |                                         |
| FlyBase ID                          | <a href="#">FBgn0022097</a>                                     |                                         |
| Predicted function                  | ATPase, H+ transporting, V1 subunit D                           |                                         |
| Atp6v1D CLEAR element conservation: |                                                                 |                                         |
|                                     | <u>5' / 5' UTR</u>                                              | <u>intron1</u>                          |
| Mdom\Atp6v1D                        | AAGACCCAATAA <b>TCACATATGA</b> CCGTATTGTAGA                     |                                         |
| Ccap\Atp6v1D-1                      | AGCTTTTGTGG <b>TCATA</b> <b>TGA</b> CATTTCTGCTGA                |                                         |
| Ccap\Atp6v1D-1                      | TGCTGACATTT <b>GTCAGCTGA</b> CCCAACGACGAC                       |                                         |
| Gmor\Atp6v1D-1                      | <b>TCACAAGACAAGTCAGCTGA</b> CCTCGAAAGAAA                        | -----                                   |
| Llon\Atp6v1D                        | <b>GAA</b> <b>CATCA</b> <b>CAAGTCAGCTGA</b> <b>CTTT</b> CTGGTAA | <b>GGAAAAGCAGGGTCATGTGAGGGATTTCAATA</b> |
| Ppap\Atp6v1D                        | <b>TTG</b> <b>CAGTTCAAGTCAGCTGA</b> <b>CTTT</b> CTGTGGCA        | <b>TGGGAATCAGTGTCATGTGAGTATCTTGTTTA</b> |
| Agam\Atp6v1D                        | <b>GGTATGATATGGTCTTGTGACCAGAGTAATCT</b>                         |                                         |
| Aara\Atp6v1D                        | <b>GGTATGATATGGTCTTGTGACCAGAGTAATCT</b>                         |                                         |
| Aqan\Atp6v1D                        | <b>GGTATGATATGGTCTTGTGACCAGAGTAATCT</b>                         |                                         |
| Achr\Atp6v1D                        | <b>GTTGTTATATGGTCTTGTGACCAGAGCAATCT</b>                         |                                         |
| Aepi\Atp6v1D                        | <b>GTTGTTACATGGTCTTGTGATCAGTACAATCT</b>                         |                                         |
| Amin\Atp6v1D                        | <b>GTGGTTATATGGTCTTGTGATCAGTGGAACTT</b>                         |                                         |
| Afun\Atp6v1D                        | <b>GTTGTTGTATGGTCTTGTGACCAGAGAACTCTG</b>                        |                                         |
| Aste\Atp6v1D                        | <b>GTTGTTATGTGGTCTTGTGACCAGAGAGCCCT</b>                         |                                         |
| Adir\Atp6v1D                        | <b>TGTGTTCTGTGGTCTTGTGACCATAA</b> TTTGCG                        |                                         |
| Anil\Atp6v1D                        | GTGTGTAACGAG <b>TCTTGTGACCATAA</b> TTTGCG                       |                                         |
| Aalb\Atp6v1D                        | <b>ATCACGTAGGGTCTTGTGATCAT</b> CGGGTTTG                         |                                         |
| Adar\Atp6v1D                        | <b>CATCACTGTAGGTCTTGTGACTGGGT</b> TTGCTG                        |                                         |
| Aaeg\Atp6v1D                        | <b>AAATTCATTTGATCTTGTGACCCGTTT</b> TGCGC                        |                                         |
| Cqui\Atp6v1D                        | <b>GTCTCGATTTGATCTTGTGACTTGAATTT</b> TGG                        |                                         |
| Mdes\Atp6v1D                        | <b>GCTGACTACTTCCTTGTGACCA</b> TACACAGAA                         |                                         |
| Aaeg\Atp6v1D                        | <b>GATCCATCAAAA</b> <b>TCACATGA</b> <b>CATG</b> TGTCAAAC        |                                         |
| Cqui\Atp6v1D                        | <b>TCACACAGTTCGTCATGTGA</b> <b>CATTTT</b> GCTGCC                |                                         |
| Mdes\Atp6v1D                        | <b>TTTTCTTTAGTGTACAGCTGA</b> <b>CTACTTT</b> CTCTTG              |                                         |
| Bmor\Atp6v1D                        | <b>TGTCTTCTGTCA</b> <b>TCAGGTGA</b> <b>TTT</b> GGGTTTGGG        |                                         |
| Msex\Atp6v1D-1                      | <b>TGTCTGCTGTCA</b> <b>TCAGGTGA</b> <b>TTTAGGTTT</b> TGG        |                                         |
| Dple\Atp6v1D-1                      | <b>TGTCTTCTGTCA</b> <b>TCAGGTGA</b> <b>TCGAGAATTAGG</b>         |                                         |
| Hmel\Atp6v1D-1                      | <b>TGTCTTCTGTCA</b> <b>TCAGGTGA</b> <b>TTGAAATTGGA</b>          |                                         |
| Pxyl\Atp6v1D                        | <b>TGTCTTCTGTCA</b> <b>TCAGGTGA</b> <b>T</b> CGTGAGCAAAA        |                                         |
| Tcas\Atp6v1D                        | <b>TATGTCACGCGT</b> <b>TCAGCTGA</b> <b>CTGATCT</b> CGTGA        |                                         |
| Dpon\Atp6v1D                        | <b>CTGATTTTCATGTCAGCTGA</b> <b>CTAGTCT</b> TGTGA                |                                         |
| Amel\Atp6v1D                        | <b>CGGTCTTACGAGTCAGCTGA</b> <b>TCAATTT</b> CAATTC               |                                         |
| Aflo\Atp6v1D                        | <b>CGGTCTTACGAGTCAGCTGA</b> <b>TCAATTT</b> CAATTC               |                                         |
| Bter\Atp6v1D                        | <b>CGGTCCTACGAGTCAGCTGA</b> <b>TCAATTT</b> CAATTC               |                                         |
| Bimp\Atp6v1D                        | <b>CGGTCCTACGAGTCAGCTGA</b> <b>TCAATTT</b> CAATTC               |                                         |
| Mrot\Atp6v1D                        | <b>CGGTCCCA</b> <b>CAAGTCAGCTGA</b> <b>TCAATCT</b> TATTC        |                                         |
| Aech\Atp6v1D                        | <b>CGGTCTCTCGTGTACAGCTGA</b> <b>TCAATTC</b> CAATTC              |                                         |
| Acep\Atp6v1D                        | <b>CGGTCTCTCATGTACAGCTGA</b> <b>TCAATCC</b> CGTTC               |                                         |
| Lhum\Atp6v1D                        | <b>CGGTCTCTCGTGTACAGCTGA</b> <b>TCAATCC</b> CGTTC               |                                         |
| Sinv\Atp6v1D                        | <b>CGGTCTCTCACGTACAGCTGA</b> <b>TCAATCC</b> CAATTC              |                                         |
| Pbar\Atp6v1D                        | -----                                                           |                                         |
| Hsal\Atp6v1D                        | <b>CGGTG</b> <b>CGCCGAGTCAGCTGA</b> <b>TCAATCC</b> CAATTC       |                                         |
| Cflo\Atp6v1D                        | <b>G</b> TCAG <b>CTCGAGTCAGCTGA</b> <b>TCAATCC</b> CGTTC        |                                         |

Nvit\Atp6v1D TTTCCGTCAAAGTCAGCTGATCAATCGTATTC  
 Ngir\Atp6v1D TTTCCGTCAAAGTCAGCTGATCAATCGTATTC  
 Nlon\Atp6v1D TTTCCGTCAAAGTCAGCTGATCAATCGTATTC

Rpro\Atp6v1D tacacattataaTCAGCTGAtgtaccttcct  
 Phum\Atp6v1D tggaaataatagTCAGCTGActttagctctga  
 Lful\Atp6v1D tacctaattgtgTCAGCTGActttacgcctac  
 Dpul\Atp6v1D cttctcttgttgTCACATGAtcagatgattct

### Atp6v1D gene structure comparison:

Key: UTR region, CDS region INTRON

| Order                   | Species                          | Atp6v1D orthologs                        | 5'exon | intron | exon | intron               | exon | intron | exon | intron | exon | intron       | exon3' | Extended CLEAR region | Position                                                             | bps from TSS                    |                |       |
|-------------------------|----------------------------------|------------------------------------------|--------|--------|------|----------------------|------|--------|------|--------|------|--------------|--------|-----------------------|----------------------------------------------------------------------|---------------------------------|----------------|-------|
| Diptera (Drosophilidae) | <i>Drosophila_melanogaster</i>   | <a href="#">Dmel\Vha36-1</a>             | 120    | 741    |      |                      |      |        |      |        |      |              |        | 221                   | ttgcaaaaagggTCATCTGActgtttttatac<br>acaattgcacagTCACATGAcagcaaacatat | 3'<br>3'                        | 1142<br>1193   |       |
|                         |                                  | <a href="#">Dmel\Vha36-2</a>             | 73     | 525    |      |                      |      |        | 75   | 597    |      |              |        |                       | 101                                                                  | ND                              |                |       |
|                         |                                  | <a href="#">Dmel\Vha36-3</a>             | 83     | 41     | 60   | 118                  | 55   | 364    |      |        | 61   | 227          |        | 45                    | ND                                                                   |                                 |                |       |
| Diptera (Muscidae)      | <i>Musca_domestica</i>           | <a href="#">Mdom\Atp6v1D-1</a>           |        | 41     | 110  | 118                  | 96   | 364    |      |        | 67   | 218          |        |                       | aagaccaataaTCACATATGAccgtattgtaga                                    | 5'                              | >-125          |       |
|                         |                                  | <a href="#">Mdom\Atp6v1D-2</a>           |        | 969    |      |                      |      |        |      |        |      |              |        |                       | ND                                                                   |                                 |                |       |
| Diptera (Tephritidae)   | <i>Ceratitis_capitata</i>        | <a href="#">Ccap\Atp6v1D-1</a>           |        | 41     | 132  | 118                  | 132  | 364    |      |        | 58   | 218          |        |                       | agcttttgtggTCATATGAcatttctgctga<br>tgctgacattgTCAGCTGAccaacgacgac    | 5'<br>5'                        | >-128<br>>-102 |       |
|                         |                                  | <a href="#">Ccap\Atp6v1D-2</a>           |        | 951    |      |                      |      |        |      |        |      |              |        |                       | ND                                                                   |                                 |                |       |
| Diptera (Glossinidae)   | <i>Glossina_morsitans</i>        | <a href="#">Gmor\Atp6v1D-1</a> TMP011652 | 124    | 41     | 73   | 118                  | 69   | 364    |      |        | 3174 | 218 (95+123) |        | 56                    | tcacaagacaagTCAGCTGAcctcgaagaaaa                                     | 5'UTR                           | 3              |       |
|                         |                                  | <a href="#">Gmor\Atp6v1D-2</a> TMP010970 |        | 1062   |      |                      |      |        |      |        |      |              |        |                       | ND                                                                   |                                 |                |       |
| Diptera (Psychodidae)   | <i>Lutzomyia_longipalpis</i>     | <a href="#">Llon\Atp6v1D</a>             |        | 41     | 123  | 700 (118+364+95+123) |      |        |      |        |      |              |        |                       | gaacatcacaaTCAGCTGActttctggttaa<br>ggaaaaagcaggTCATGTGAgggattcaata   | 5'<br>intron1                   | >-47<br>>138   |       |
|                         | <i>Phlebotomus_papatasi</i>      | <a href="#">Ppap\Atp6v1D</a>             |        | 41     | 135  | 459                  |      |        |      | 63     | 241  |              |        |                       | ttgcagttcaagTCAGCTGActtctgtggca<br>tgggaatcagtgTCATGTGAgtaicttgttta  | 5'<br>intron1                   | >-48<br>>147   |       |
|                         |                                  |                                          |        |        |      |                      |      |        |      |        |      |              |        |                       |                                                                      |                                 |                |       |
| Diptera (Culicidae)     | <i>Anopheles_gambiae</i>         | <a href="#">Agam\Atp6v1D</a> AGAP010298  | 224    | 41     | 83   | 118                  | 75   | 364    |      |        | 67   | 95           | 82     | 123                   | 250                                                                  | ggtatgatatggTCTTGTGAccagagtaact | 5'UTR          | 108   |
|                         | <i>Anopheles_arabiensis</i>      | <a href="#">Aara\Atp6v1D</a>             |        | 41     | 83   | 118                  | 75   | 364    |      |        | 67   | 95           | 82     | 123                   |                                                                      | ggtatgatatggTCTTGTGAccagagtaact | 5'             | >-110 |
|                         | <i>Anopheles_quadriannulatus</i> | <a href="#">Aqan\Atp6v1D</a>             |        | 41     | 83   | 118                  | 75   | 364    |      |        | 67   | 95           | 82     | 123                   |                                                                      | ggtatgatatggTCTTGTGAccagagtaact | 5'             | >-110 |
|                         | <i>Anopheles_christyi</i>        | <a href="#">Achr\Atp6v1D</a>             |        | 41     | 86   | 118                  | 77   | 364    |      |        | 72   | 95           | 82     | 123                   |                                                                      | gttgttatggTCTTGTGAccagagcaact   | 5'             | >-108 |
|                         | <i>Anopheles_epiroticus</i>      | <a href="#">Aepi\Atp6v1D</a>             |        | 41     | 84   | 118                  | 74   | 364    |      |        | 68   | 95           | 65     | 123                   |                                                                      | gttgttacatggTCTTGTGAtcagtacaact | 5'             | >-104 |
|                         | <i>Anopheles_minimus</i>         | <a href="#">Amin\Atp6v1D</a>             |        | 41     | 79   | 118                  | 92   | 364    |      |        | 64   | 95           | 79     | 123                   |                                                                      | gtgtgtatatggTCTTGTGAtcagtgaacct | 5'             | >-110 |
|                         | <i>Anopheles_funestus</i>        | <a href="#">Afun\Atp6v1D</a>             |        | 41     | 78   | 118                  | 74   | 364    |      |        | 64   | 95           | 64     | 123                   |                                                                      | gttgttgatggTCTTGTGAccagagaactcg | 5'             | >-109 |
|                         | <i>Anopheles_stephensi</i>       | <a href="#">Aste\Atp6v1D</a>             |        | 41     | 79   | 118                  | 80   | 364    |      |        | 71   | 95           | 76     | 123                   |                                                                      | gttgttatgtggTCTTGTGAccagaagacct | 5'             | >-110 |
|                         | <i>Anopheles_dirus</i>           | <a href="#">Adir\Atp6v1D</a>             | 98     | 41     | 73   | 118                  | 73   | 364    |      |        | 294  | 95           | 71     | 123                   |                                                                      | tgtgttctgtggTCTTGTGAccataattgcg | 5'             | >-108 |

|                                                              |                                |                                                              |     |     |     |     |       |     |      |     |      |      |                |     |      |                                                                       |                                                                      |           |               |
|--------------------------------------------------------------|--------------------------------|--------------------------------------------------------------|-----|-----|-----|-----|-------|-----|------|-----|------|------|----------------|-----|------|-----------------------------------------------------------------------|----------------------------------------------------------------------|-----------|---------------|
|                                                              | <i>Anopheles_nili</i>          | <a href="#">Anil\Atp6v1D</a>                                 |     | 41  | 64  | 118 | 68    | 364 |      |     | 87   | 95   | 87             | 123 |      | gtgtgaacgagTCTTGTGAccataattgcg                                        | 5'                                                                   | >-90      |               |
|                                                              | <i>Anopheles_albimanus</i>     | <a href="#">Aalb\Atp6v1D</a>                                 | 98  | 41  | 66  | 118 | 71    | 364 |      |     | 58   | 95   | 87             | 123 |      | atcactgtaggTCTTGTGAtcatcggtttg                                        | 5'                                                                   | >-74      |               |
|                                                              | <i>Anopheles_darlingi</i>      | <a href="#">Adar\Atp6v1D</a>                                 |     | 41  | 68  | 118 | 71    | 364 |      |     | 77   | 95   | 87             | 123 |      | catcactgtaggTCTTGTGActgggttgcctg                                      | 5'                                                                   | >-79      |               |
|                                                              | <i>Aedes_aegypti</i>           | <a href="#">Aaeg\Atp6v1D</a><br><a href="#">AAEL009808</a>   | 98  | 41  | 68  | 118 | 19182 | 364 |      |     | 8305 | 95   | 58             | 123 | 301  | gatccatcaaaaTCACATGAcattgtgcaaac<br>aaattcatttgaTCTTGTGAcccggttttgcgc | 5'<br>5'UTR                                                          | -15<br>27 |               |
|                                                              | <i>Culex_pipiens_qui.</i>      | <a href="#">Cqui\Atp6v1D-1</a><br><a href="#">CPIJ015086</a> | 84  | 741 |     |     |       |     |      |     |      |      |                |     |      | tcacacagttcgTCATGTGAcattttgctgcc<br>gtctcgatttgaTCTTGTGActtgaatttgg   | 5'<br>5'UTR                                                          | -46<br>29 |               |
| <a href="#">Cqui\Atp6v1D-2</a><br><a href="#">CPIJ009338</a> |                                |                                                              | 741 |     |     |     |       |     |      |     |      |      |                |     | ND   |                                                                       |                                                                      |           |               |
| Diptera<br>(Cecidomyiidae)                                   | <i>Mayetiola_destructor</i>    | <a href="#">Mdes\Atp6v1D</a>                                 |     | 41  | 282 | 118 | 103   | 180 |      | 72  | 184  |      | 94             | 95  | 85   | 123                                                                   | ttttcttagtgTCAGCTGActacttctcttg<br>gctgactacttcTCTTGTGAccatacacagaa  | 5'<br>5'  | >-103<br>>-89 |
|                                                              |                                |                                                              |     |     |     |     |       |     |      |     |      |      |                |     |      |                                                                       |                                                                      |           |               |
| Lepidoptera                                                  | <i>Bombyx_mori</i>             | <a href="#">Bmor\Atp6v1D</a><br><a href="#">LOC692984</a>    | 57  | 41  | 87  | 118 | 281   | 148 | 1308 | 216 |      | 1472 | 131            | 993 | 90   | 544                                                                   | tgtcttctgtcaTCAGGTGAttgggtttggg                                      | 5'UTR     | -5            |
|                                                              | <i>Manduca sexta</i>           | <a href="#">Msex\Atp6v1D-1</a>                               |     | 41  | 100 | 118 | ND    | 148 | 272  | 216 |      | 866  | 131            | 212 | 87   |                                                                       | tgtctgctgtcaTCAGGTGAtttaggttttgg                                     | 5'        | >-65          |
|                                                              | <i>Danaus_plexippus</i>        | <a href="#">Dple\Atp6v1D-1</a>                               |     | 41  | 77  | 118 | 666   | 148 | 1020 | 216 |      | 509  | 131            | 450 | 96   |                                                                       | tgtcttctgtcaTCAGGTGAtcgagaattagg                                     | 5'        | >-59          |
|                                                              | <i>Heliconius_melpomene</i>    | <a href="#">Hmel\Atp6v1D-1</a>                               |     | 41  | 96  | 118 | 857   | 148 | 382  | 216 |      | 933  | 131            | 573 | 93   |                                                                       | tgtcttctgtcaTCAGGTGAttgaaattggga                                     | 5'        | >-61          |
|                                                              | <i>Plutella_xylostella</i>     | <a href="#">Pxyl\Atp6v1D</a>                                 |     | 41  | 99  | 118 | 367   | 148 | 1515 | 216 |      | 571  | 131            | 432 | 87   |                                                                       | tgtcttctgtcaTCAGGTGAtcgtgagcaaaa                                     | 5'        | >-56          |
|                                                              | <i>Manduca sexta</i>           | <a href="#">Msex\Atp6v1D-2</a>                               |     | 267 |     |     | 524   | 239 | 91   | 82  |      | 67   | 100            | 513 | 170? |                                                                       | tgtctgctgtcaTCAGGTGAtttaggttttgg                                     | 5'?       | ND            |
|                                                              | <i>Danaus_plexippus</i>        | <a href="#">Dple\Atp6v1D-2</a>                               |     | 267 |     |     | 86    | 239 | 72   | 82  |      | 83   | 106            | 114 | 155  |                                                                       | <br>tgtcttctgtcaTCAGGTGAtcgagaattagg                                 | 5'?       | ND            |
|                                                              | <i>Heliconius_melpomene</i>    | <a href="#">Hmel\Atp6v1D-2</a>                               |     | 267 |     |     | 89    | 239 | 134  | 82  |      | 77   | 115            | 608 | 155  |                                                                       | tgtcttctgtcaTCAGGTGAttgaaattggga                                     | 5' ?      | ND            |
|                                                              |                                |                                                              |     |     |     |     |       |     |      |     |      |      |                |     |      |                                                                       |                                                                      |           |               |
| Strepsiptera                                                 | <i>Mengenilla_moldrzyki</i>    | <a href="#">Mmol\Atp6v1D</a>                                 |     | 41  |     | 118 | 86    | 364 |      |     | ND   | 227  |                |     |      | ND                                                                    |                                                                      |           |               |
| Coleoptera                                                   | <i>Tribolium_castaneum</i>     | <a href="#">Tcas\Atp6v1D</a><br><a href="#">LOC660332</a>    |     | 41  | 108 | 118 | 46    | 148 | 57   | 216 |      | 46   | 215 (131 + 84) |     |      |                                                                       | tatgtcacgcggTCAGCTGActgatctcgtga                                     | 5'        | >-37          |
|                                                              | <i>Dendroctonus_ponderosae</i> | <a href="#">Dpon\Atp6v1D</a>                                 |     | 41  | 204 | 118 | 59    | 148 | 60   | 216 |      | 59   | 224            |     |      |                                                                       | ggcaaaataaggTCAGCTGAttttcatgtcag<br>ctgattttcatgTCAGCTGActagtcttgtga | 5'        | >-113<br>>-97 |
|                                                              |                                |                                                              |     |     |     |     |       |     |      |     |      |      |                |     |      |                                                                       |                                                                      |           |               |
| Hymenoptera                                                  | <i>Apis_mellifera</i>          | <a href="#">Ame\Atp6v1D</a><br><a href="#">GB15226</a>       | 44  | 41  | 342 | 118 | 109   | 486 |      |     |      |      | 74             | 93  |      | 572                                                                   | cggctcttacgagTCAGCTGAtcaatttcattc                                    | 5'UTR     | 6             |
|                                                              | <i>Apis_florea</i>             | <a href="#">Aflo\Atp6v1D</a>                                 |     | 41  | 331 | 118 | 122   | 486 |      |     |      |      | 72             | 93  |      |                                                                       | cggctcttacgagTCAGCTGAtcaatttcattc                                    | 5'        | >-38          |
|                                                              | <i>Bombus_terrestris</i>       | <a href="#">Bter\Atp6v1D</a><br><a href="#">LOC100643813</a> | 47  | 41  | 349 | 118 | 72    | 486 |      |     |      |      | 80             | 96  |      | 748                                                                   | cggctctacgagTCAGCTGAtcagtttcattc                                     | 5'UTR     | 2             |
|                                                              | <i>Bombus_impatiens</i>        | <a href="#">Bimp\Atp6v1D</a>                                 |     | 41  | 741 | 118 | 72    | 486 |      |     |      |      | 82             | 96  |      |                                                                       | cggctctacgagTCAGCTGAtcagtttcattc                                     | 5'        | >-38          |
|                                                              | <i>Megachile_rotundata</i>     | <a href="#">Mrot\Atp6v1D</a>                                 |     | 41  | 371 | 118 | 79    | 486 |      |     |      |      | 76             | 93  |      |                                                                       | cggctcccacaagTCAGCTGAtcaatttcattc                                    | 5'        | >-36          |
|                                                              | <i>Acromyrmex_echinator</i>    | <a href="#">Aech\Atp6v1D</a>                                 |     | 41  | 547 | 118 | 185   | 486 |      |     |      |      | 192            | 93  |      |                                                                       | cggctctctgtgTCAGCTGAtcaattccattc                                     | 5'        | >-39          |
|                                                              | <i>Atta_cephalotes</i>         | <a href="#">Acep\Atp6v1D</a>                                 |     | 41  | 555 | 118 | 173   | 486 |      |     |      |      | 180            | 93  |      |                                                                       | cggctctctatgTCAGCTGAtcaatcccgttc                                     | 5'        | >-39          |
|                                                              | <i>Solenopsis_invicta</i>      | <a href="#">Sinv\Atp6v1D</a>                                 |     | 41  | 526 | 118 | 961   | 486 |      |     |      |      | 131            | 93  |      |                                                                       | cggctctctacgTCAGCTGAtcaatcccattc                                     | 5'        | >-38          |
