# Supplementary material for: Structural and Comparative Analyses of Insects Suggest the Presence of an Ultra-Conserved Regulatory Element of the Genes Encoding Vacuolar-Type ATPase Subunits and Assembly Factors
Source: MDPI journal article supplement (doi:10.3390/biology12081127), 2023-08-13
Supplement: s1 [file s1]

| Gene Cluster ID              | Atp6v1A                                                |
|------------------------------|--------------------------------------------------------|
| Drosophila melanogaster gene | Vha68-2 (CG3762)                                       |
| FlyBase ID                   | FBgn0263598                                            |
| Predicted function           | ATPase, H+ transporting, lysosomal 70kDa, V1 subunit A |

Atp6v1A CLEAR element conservation:

|       |                    |                   |                   |         |
|-------|--------------------|-------------------|-------------------|---------|
| Dmel\ | 5'/intron1         | 5'/intron1        | intron1           | intron1 |
| Mdom\ | 5'/intron1         | 5'/intron1        | intron1           | intron1 |
| Ccap\ | 5'/intron1         | 5'/intron1        | intron1           | intron1 |
| Gmor\ | 5'/5'UTR           | intron            |                   |         |
| Llon\ | 5'/5'UTR           | intron            |                   |         |
| Ppap\ | 5'/5'UTR           | intron            |                   |         |
| Agam\ | intron1            | intron1           | intron2           | intron2 |
| Aara\ | intron1            | intron1           | intron2           | intron2 |
| Aqan\ | intron1            | intron1           | intron2           | intron2 |
| Achr\ | intron1            | intron1           | intron2           | intron2 |
| Aepi\ | intron1            | intron1           | intron2           | intron2 |
| Amin\ | intron1            | intron1           | intron2           | intron2 |
| Afun\ | intron1            | intron1           | intron2           | intron2 |
| Aste\ | intron1            | intron1           | intron2           | intron2 |
| Adir\ | intron1            | intron1           | intron2           | intron2 |
| Anil\ | intron1            | intron1           | intron2           | intron2 |
| Aalb\ | intron1            | intron1           | intron2           | intron2 |
| Adar\ | intron1            | intron1           | intron2           | intron2 |
| Cqui\ | intron1            | intron1           | intron2           | intron2 |
| Aaeg\ | intron1            | intron1           | intron2           | intron2 |
| Mdes\ | 5'/5'UTR           | intron1           | intron1           |         |
| Mdes\ | 5'/5'UTR           | intron1           | intron1           |         |
| Mdes\ | 5'/5'UTR           | intron1           | intron1           |         |
| Bmor\ | 5'/5'UTR           | intron1           | intron1           |         |
| Msex\ | 5'/5'UTR           | intron1           | intron1           |         |
| Dple\ | 5'/5'UTR           | intron1           | intron1           |         |
| Hmel\ | 5'/5'UTR           | intron1           | intron1           |         |
| Pxyl\ | 5'/5'UTR           | intron1           | intron1           |         |
| Tcas\ | 5'/5'UTR           | intron1           | intron1           |         |
| Dpon\ | 5'/5'UTR           | intron1           | intron1           |         |
| Amel\ | 5'/5'UTR           | intron1           | intron1           |         |
| Aflo\ | 5'/5'UTR           | intron1           | intron1           |         |
| Bter\ | 5'/5'UTR           | intron1           | intron1           |         |
| Bimp\ | 5'/5'UTR           | intron1           | intron1           |         |
| Mrot\ | 5'/5'UTR           | intron1           | intron1           |         |
| Cflo\ | 5'/5'UTR           | intron1           | intron1           |         |
| Aech\ | 5'/5'UTR           | intron1           | intron1           |         |
| Acep\ | 5'/5'UTR           | intron1           | intron1           |         |
| Sinv\ | 5'/5'UTR           | intron1           | intron1           |         |
| Lhum\ | 5'/5'UTR           | intron1           | intron1           |         |
| Pbar\ | 5'/5'UTR           | intron1           | intron1           |         |
| Hsal\ | 5'/5'UTR           | intron1           | intron1           |         |
| Ngir\ | 5'/5'UTR           | intron1           | intron1           |         |
| Nvit\ | 5'/5'UTR           | intron1           | intron1           |         |
| Nlon\ | 5'/5'UTR           | intron1           | intron1           |         |
| Lful\ | 5'/5'UTR           | intron1           | intron1           |         |
| Apis\ | 5'/5'UTR?/intron1? | 5'/5'UTR?/intron1 | 5'/5'UTR?/intron1 |         |
| Dpul\ | 5'/5'UTR?/intron1? | 5'/5'UTR?/intron1 | 5'/5'UTR?/intron1 |         |
| Isca\ | 5'/5'UTR?/intron1? | 5'/5'UTR?/intron1 | 5'/5'UTR?/intron1 |         |
| Phum\ | 5'/5'UTR?/intron1? | 5'/5'UTR?/intron1 | 5'/5'UTR?/intron1 |         |
| Hsap\ | 5'/5'UTR?/intron1? | 5'/5'UTR?/intron1 | 5'/5'UTR?/intron1 |         |

Atp6v1A gene structure comparison:

| Order                   | Species                 | Atp6v1A orthologs | 5'exon | intron | exon | intron | exon | intron | exon | intron | exon3' | Extended CLEAR region | Position | bps from TSS |
|-------------------------|-------------------------|-------------------|--------|--------|------|--------|------|--------|------|--------|--------|-----------------------|----------|--------------|
| Diptera (Drosophilidae) | Drosophila_melanogaster | DmelVha68.2       | 124    | 1170   | 23   | 76     | 413  | 698    | 108  | 978    | 67     | 93                    | 546      | 470          |
| Diptera (Muscidae)      | Musca_domestica         | MdomVatp6v1A.1    |        |        | ND   | 76     | 74   | 698    | 83   | 978    | 70     | 93                    |          | 470          |

|                            |                           |                             |     |      |    |      |      |      |      |       |     |     |     |     |     |     |     |     |     |     |     |     |     |    |      |     |     |     |     |      |     |                                                                                                                                       |                                                                   |                                                                                                                                                                           |                                              |                                             |  |  |  |  |  |    |    |  |                                                                  |                   |
|----------------------------|---------------------------|-----------------------------|-----|------|----|------|------|------|------|-------|-----|-----|-----|-----|-----|-----|-----|-----|-----|-----|-----|-----|-----|----|------|-----|-----|-----|-----|------|-----|---------------------------------------------------------------------------------------------------------------------------------------|-------------------------------------------------------------------|---------------------------------------------------------------------------------------------------------------------------------------------------------------------------|----------------------------------------------|---------------------------------------------|--|--|--|--|--|----|----|--|------------------------------------------------------------------|-------------------|
|                            |                           | Mdom\Atp6v1A-2              |     |      | ND | 76   | 66   | 698  |      |       |     |     |     |     |     |     |     | 75  | 978 |     |     |     |     |    |      |     |     |     | 61  | 93   |     | ND                                                                                                                                    |                                                                   |                                                                                                                                                                           |                                              |                                             |  |  |  |  |  |    |    |  |                                                                  |                   |
|                            |                           | Mdom\Atp6v1A-3              |     |      | ND | 1932 |      |      |      |       |     |     |     |     |     |     |     |     |     |     |     |     |     |    |      |     |     |     |     |      |     | ND                                                                                                                                    |                                                                   |                                                                                                                                                                           |                                              |                                             |  |  |  |  |  |    |    |  |                                                                  |                   |
| Diptera<br>(Tephritidae)   | Ceratitis_capitata        | Ccap\Atp6v1A-1              | 81  | 621  | 22 | 76   | 69   | 698  |      |       |     |     |     |     |     |     |     | 77  | 978 |     |     |     |     |    |      |     |     |     | 70  | 93   |     | tpagcaaacatgTCAGCTGAaccggaatgct<br>tgtaacacgcgTCAGCTGAacctagcagat<br>ctaagctgtggTCACGTGAataaaagcttt<br>gagataagccgTCAGCTGAacttaaccgtt | 5'<br>5'<br>intron1<br>intron1                                    | -284<br>-63<br>230<br>594                                                                                                                                                 |                                              |                                             |  |  |  |  |  |    |    |  |                                                                  |                   |
|                            |                           | Ccap\Atp6v1A-2              |     |      | ND | 76   | 222  | 698  |      |       |     |     |     |     |     |     |     | 61  | 978 |     |     |     |     |    |      |     |     |     | 174 | 93   |     | ND                                                                                                                                    |                                                                   |                                                                                                                                                                           |                                              |                                             |  |  |  |  |  |    |    |  |                                                                  |                   |
| Diptera<br>(Glossinidae)   | Glossina_morsitans        | Gmor\Atp6v1A-1<br>TMP01178  | 133 | 274  | 55 | 76   | 93   | 698  |      |       |     |     |     |     |     |     |     | 60  | 978 |     |     |     |     |    |      |     |     |     | 73  | 93   | 144 | caattccaaatgTCACGTGAataaaagcttt<br>ggaaaggaaaagTCAGCTGAcaagtgaaaaa                                                                    | 5'UTR?<br>intron1                                                 | -35<br>254                                                                                                                                                                |                                              |                                             |  |  |  |  |  |    |    |  |                                                                  |                   |
|                            |                           | Gmor\Atp6v1A-2<br>TMP02752  |     |      | ND | 73   | 70   | 698  |      |       |     |     |     |     |     |     |     | 59  | 978 |     |     |     |     |    |      |     |     |     | 73  | 93   |     | ND                                                                                                                                    |                                                                   |                                                                                                                                                                           |                                              |                                             |  |  |  |  |  |    |    |  |                                                                  |                   |
|                            |                           | Gmor\Atp6v1A-3<br>TMP007159 |     |      | ND | 1932 |      |      |      |       |     |     |     |     |     |     |     |     |     |     |     |     |     |    |      |     |     |     |     |      |     | ND                                                                                                                                    |                                                                   |                                                                                                                                                                           |                                              |                                             |  |  |  |  |  |    |    |  |                                                                  |                   |
| Diptera<br>(Psychodidae)   | Lutzomyia_longipalpis     | Llon\Atp6v1A                | 93  | 490  | 23 | 76   | 71   | 195  | 2085 | 1084  |     |     |     |     |     |     |     |     |     | 65  | 397 |     |     |    |      |     |     |     |     |      | 87  | 93                                                                                                                                    | 76                                                                | tcacaagatcgtTCAGCTGAgtgtgtgtgat<br>atgtaactcaagTCATGTGAatcgaaaaaat                                                                                                        | 5'UTR<br>intron1                             | 8<br>412                                    |  |  |  |  |  |    |    |  |                                                                  |                   |
|                            | Phlebotomus_papatasi      | Ppap\Atp6v1A                | 38  | 559  | 23 | 76   | 67   | 195  | ND   | 578   |     |     |     |     |     |     |     |     |     | ND  | 506 |     |     |    |      |     |     |     |     |      | ND  | 397                                                                                                                                   |                                                                   |                                                                                                                                                                           |                                              |                                             |  |  |  |  |  | 66 | 93 |  | tcacaagcgtgTCAGCTGAgaagctgtgtgat<br>catcggggagTCATGTGAacagtgaatt | 5'UTR?<br>intron1 |
| Diptera<br>(Culicidae)     | Anopheles_gambiae         | Agam\Atp6v1A<br>AGAP003153  | 30  | 574  | 67 | 76   | 735  | 195  | 75   | 1084  |     |     |     |     |     |     |     |     |     | 74  | 397 |     |     |    |      |     |     |     |     |      | 100 | 93                                                                                                                                    |                                                                   | gaaccaaacaggTCACATGAaccgcagacct<br>ttgcaacctgaTCAGCTGAacctttttgag<br>gggtcgccagaagTCACATGAagtggaatgg<br>ttatgaatcggTCATGTGAaccactgtgcc<br>tggtggaaaggTCAGATGAgtgtgtaccga  | intron1<br>intron1<br>intron2<br>intron2     | 405<br>514<br>927<br>1020<br>1248           |  |  |  |  |  |    |    |  |                                                                  |                   |
|                            | Anopheles_arabiensis      | Ara\Atp6v1A                 |     |      | ND | 76   | 724  | 195  | 75   | 1084  |     |     |     |     |     |     |     |     |     | 75  | 397 |     |     |    |      |     |     |     |     |      | 122 | 93                                                                                                                                    |                                                                   | gaaccaaacaggTCACATGAaccgcagacct<br>ttgcaacctgaTCAGCTGAacctttttgag<br>gggtcgccagaagTCACATGAagtggaatgg<br>ttatgaatcggTCATGTGAaccactgtgcc<br>tggtggaaaggTCAGATGAgtgtgtaccga  | intron1?<br>intron1?<br>intron2?<br>intron2? | > -262<br>> -149<br>> 256<br>> 351<br>> 579 |  |  |  |  |  |    |    |  |                                                                  |                   |
|                            | Anopheles_quadrannulatus  | Aqan\Atp6v1A                |     |      | ND | 76   | 731  | 195  | 75   | 1084  |     |     |     |     |     |     |     |     |     | 90  | 397 |     |     |    |      |     |     |     |     |      | 121 | 93                                                                                                                                    |                                                                   | gaaccaaacaggTCACATGAaccgcagacct<br>ttgcaacctgaTCAGCTGAacctttttgag<br>gggtcgccagaagTCACATGAagtggaatgg<br>ttatgaatcggTCATGTGAaccactgtgcc<br>tggtggaaaggTCAGATGAgtgtgtaccga  | intron1?<br>intron1?<br>intron2?<br>intron2? | > -262<br>> -149<br>> 261<br>> 354<br>> 576 |  |  |  |  |  |    |    |  |                                                                  |                   |
|                            | Anopheles_christyi        | Achr\Atp6v1A                |     |      | ND | 76   | 693  | 195  | 70   | 1084* |     |     |     |     |     |     |     |     |     | 90  | 397 |     |     |    |      |     |     |     |     |      | 75  | 93                                                                                                                                    |                                                                   | gaaccaaacaggTCACATGAactgcagacca<br>tttcaacctgaTCAGCTGAacctttttgag<br>gggtcgccagagTCACATGAagtggaatgg<br>ttatgaatcggTCATGTGAaccactctc<br>atctggaatggTCAGATGAgtgggtgtgat     | intron1?<br>intron1?<br>intron2?<br>intron2? | > -252<br>> -161<br>> 246<br>> 321<br>> 530 |  |  |  |  |  |    |    |  |                                                                  |                   |
|                            | Anopheles_epiroticus      | Aepi\Atp6v1A                |     |      | ND | 76   | 674  | 195  | 68   | 1084  |     |     |     |     |     |     |     |     |     | 93  | 397 |     |     |    |      |     |     |     |     |      | 97  | 93                                                                                                                                    |                                                                   | aaaccaaacaggTCACATGAactgcagacca<br>tcttcaaccggaTCAGCTGAacctttttgag<br>cgctgtgtcgagTCACATGAagtggaatgg<br>ttatgaatcggTCATGTGAaccactgttgg<br>atctagaatggTCAGATGAgtgggtgtgtt  | intron1?<br>intron1?<br>intron2?<br>intron2? | > -244<br>> -153<br>> 228<br>> 309<br>> 511 |  |  |  |  |  |    |    |  |                                                                  |                   |
|                            | Anopheles_minimus         | Amin\Atp6v1A                |     |      | ND | 76   | 606  | 195  | 65   | 1084  |     |     |     |     |     |     |     |     |     | 76  | 397 |     |     |    |      |     |     |     |     |      | 72  | 93                                                                                                                                    |                                                                   | gaaccgaactgtTCACATGAactgcgtttcgg<br>agcttctctgaTCAGCTGAacctttttgag<br>gtcgtgtgcagTCACATGAagtggaatgg<br>atatgaatcggTCATGTGAactgtttgaaga<br>ttctggaatggTCAGATGAgtgaagaagtg  | intron1?<br>intron1?<br>intron2?<br>intron2? | > -217<br>> -144<br>> 238<br>> 312<br>> 509 |  |  |  |  |  |    |    |  |                                                                  |                   |
|                            | Anopheles_funestus        | Afun\Atp6v1A                |     |      | ND | 76   | 616  | 195  | 67   | 1084  |     |     |     |     |     |     |     |     |     | 83  | 397 |     |     |    |      |     |     |     |     |      | 78  | 93                                                                                                                                    |                                                                   | gaacctaacaggTCACATGAactgcgtttcgg<br>agcttctttgaTCAGCTGAacctttttgag<br>gtgggtcagcagTCACATGAagtggaatgg<br>ttatgaatcggTCATGTGAactgtttgaaga<br>tttgaatggTCAGATGAgtgatggaag    | intron1?<br>intron1?<br>intron2?<br>intron2? | > -219<br>> -146<br>> 233<br>> 307<br>> 506 |  |  |  |  |  |    |    |  |                                                                  |                   |
|                            | Anopheles_stephensi       | Aste\Atp6v1A                |     |      | ND | 76   | 628  | 195  | 69   | 1084  |     |     |     |     |     |     |     |     |     | 75  | 397 |     |     |    |      |     |     |     |     |      | 82  | 93                                                                                                                                    |                                                                   | gtaccgaacaggTCACATGAaccgcgtttcgg<br>cttcaacctgaTCAGCTGAacctcttccat<br>gggtcgtgcagTCACATGAagtggaatgg<br>acatgaatcggTCATGTGAactgtttgtgag<br>atctgaatcggTCAGATGAgtgggagactc  | intron1?<br>intron1?<br>intron2?<br>intron2? | > -231<br>> -152<br>> 244<br>> 319<br>> 521 |  |  |  |  |  |    |    |  |                                                                  |                   |
|                            | Anopheles_dirus           | Adir\Atp6v1A                |     |      | ND | 76   | 603  | 195  | 73   | 1084  |     |     |     |     |     |     |     |     |     | 78  | 397 |     |     |    |      |     |     |     |     |      | 111 | 93                                                                                                                                    |                                                                   | gtacctaacaggTCACATGAactgcgtgtgatg<br>ggctgttttgaTCAGCTGAacctttttgag<br>gtgcgcagccagTCACATGAagtggaatgg<br>agatgaatcggTCATGTGAaccggtgtgtt<br>atctgtgtgggTCAGATGAgtcgtttactt | intron1?<br>intron1?<br>intron2?<br>intron2? | > -231<br>> -142<br>> 213<br>> 296<br>> 485 |  |  |  |  |  |    |    |  |                                                                  |                   |
|                            | Anopheles_nili            | Anil\Atp6v1A                |     |      | ND | 76   | 645  | 195  | 80   | 1084  |     |     |     |     |     |     |     |     |     | 83  | 397 |     |     |    |      |     |     |     |     |      | 88  |                                                                                                                                       |                                                                   | aatcaaacgggTCACATGAaccaagactca<br>ccatcctttgaTCAGCTGAactttttga<br>tcttcaagaagTCACATGAagtggaatg<br>tttgatgttaTCATGTGAactcctcagc<br>atgtgtttggTCAGATGAcatgatgattt           | intron1?<br>intron1?<br>intron2?<br>intron2? | > -210<br>> -140<br>> 241<br>> 373<br>> 570 |  |  |  |  |  |    |    |  |                                                                  |                   |
|                            | Anopheles_albimanus       | Aalb\Atp6v1A                |     |      | ND | 76   | 644  | 1279 |      |       |     |     |     |     |     |     |     |     |     | 77  | 397 |     |     |    |      |     |     |     |     |      | 83  | 93                                                                                                                                    |                                                                   | gaaacccpgggTCACATGAaccacactccc<br>ttgtgtggaagTCACATGAacaggtgtggaac<br>gtctcgggggTCAGATGAaccacaggtgtg                                                                      | intron1?<br>intron2?                         | > -228<br>> 191<br>> 521                    |  |  |  |  |  |    |    |  |                                                                  |                   |
|                            | Anopheles_darlingi        | Adar\Atp6v1A                |     |      | ND | 76   | 646  | 1279 |      |       |     |     |     |     |     |     |     |     |     | 75  | 397 |     |     |    |      |     |     |     |     |      | 82  | 93                                                                                                                                    |                                                                   | gaaacccpgggTCACATGAaccacactccc<br>ttgtgtggaagTCACATGAacaggtgtggaat<br>gcggtgtggggTCAGATGAccccctcgtg                                                                       | intron1?<br>intron2?                         | > -237<br>> 187<br>> 512                    |  |  |  |  |  |    |    |  |                                                                  |                   |
|                            | Aedes_aegypti             | Aaep\Atp6v1A<br>AAEL008782  | 127 | 523  | 48 | 76   | 9638 | 195  | 67   | 1084  |     |     |     |     |     |     |     |     |     | 68  | 397 |     |     |    |      |     |     |     |     |      | 98  | 93                                                                                                                                    | 1088                                                              | attagatttggTCACATGAacctctaccact<br>caagaacaggTCACATGAactgtatgtga<br>agtaacatactTCAGCTGAgtcgtttggaat                                                                       | intron1<br>intron2                           | 479<br>905<br>1004                          |  |  |  |  |  |    |    |  |                                                                  |                   |
| Culex_pipiens_qui.         | Cqui\Atp6v1A<br>CP0007722 |                             |     | ND   | 76 | 5977 | 1279 |      |      |       |     |     |     |     |     |     |     |     | 61  | 397 |     |     |     |    |      |     |     |     |     | 3297 | 93  |                                                                                                                                       | ttctgattgtgTCACATGAaccagaccact<br>acagagagtcagTCACATGAactgtgtgtga | intron1?<br>intron2?                                                                                                                                                      | > -209<br>> 207                              |                                             |  |  |  |  |  |    |    |  |                                                                  |                   |
| Diptera<br>(Cecidomyiidae) | Mayetiola_destructor      | Mdes\Atp6v1A                |     |      | ND | 76   | 91   | 663  |      |       |     |     |     |     |     |     |     | 71  | 616 |     |     |     |     |    |      |     |     |     | 109 | 93   |     | gtgaataacaggTCATGTGAactgttcacag<br>agcaggtgtgagTCATGTGAaccagactctc<br>gtcaattaaatTCATGTGAactgcagaaatt                                 | 5'<br>5'<br>intron1?                                              | > -709<br>> -480<br>> -256                                                                                                                                                |                                              |                                             |  |  |  |  |  |    |    |  |                                                                  |                   |
| Lepidoptera                | Bombyx_mori               | Bmor\Atp6v1A                | 90  | 2217 | 34 | 85   | 368  | 113  | 371  | 228   | 371 | 138 | 931 | 152 | 760 | 125 | 847 | 147 | 215 | 216 | 694 | 160 | 694 | 70 | 1031 | 137 | 939 | 190 | 353 | 93   | 285 | aatcaatgatTCAGCTGAatcatgacaag<br>gtatgattgggTCAGCTGAactcttaaat                                                                        | 5'<br>5'                                                          | -117<br>-81                                                                                                                                                               |                                              |                                             |  |  |  |  |  |    |    |  |                                                                  |                   |

[illegible]
