# Supplementary material for: Structural and Comparative Analyses of Insects Suggest the Presence of an Ultra-Conserved Regulatory Element of the Genes Encoding Vacuolar-Type ATPase Subunits and Assembly Factors
Source: MDPI journal article supplement (doi:10.3390/biology12081127), 2023-08-13
Supplement: s1 [file s1]

|                                     |                                                                          |
|-------------------------------------|--------------------------------------------------------------------------|
| Gene Cluster ID                     | Atp6ap2                                                                  |
| <b>Drosophila melanogaster gene</b> | <b>VhaM8.9 (CG8444)</b>                                                  |
| FlyBase ID                          | <a href="#">FBgn0037671</a>                                              |
| <b>Predicted function</b>           | <b>ATPase, H<sup>+</sup> transporting, lysosomal accessory protein 2</b> |
| Protein size                        | 320 amino acids                                                          |
| Cytogenetic map                     | 3R:85D6-85D7                                                             |
| Gene sequence location              | <a href="#">3R:5086363..5088315</a> [+]                                  |
| <b>Dmel CLEAR sequence</b>          | <b>TCACATGA; TCATATGA</b>                                                |
| CLEAR sequence location(s)          | 3R:5086356..5086363; 3R:5086414..5086421                                 |

FlyBase VhaM8.9 (CG8444) gene model & CLEAR element position:

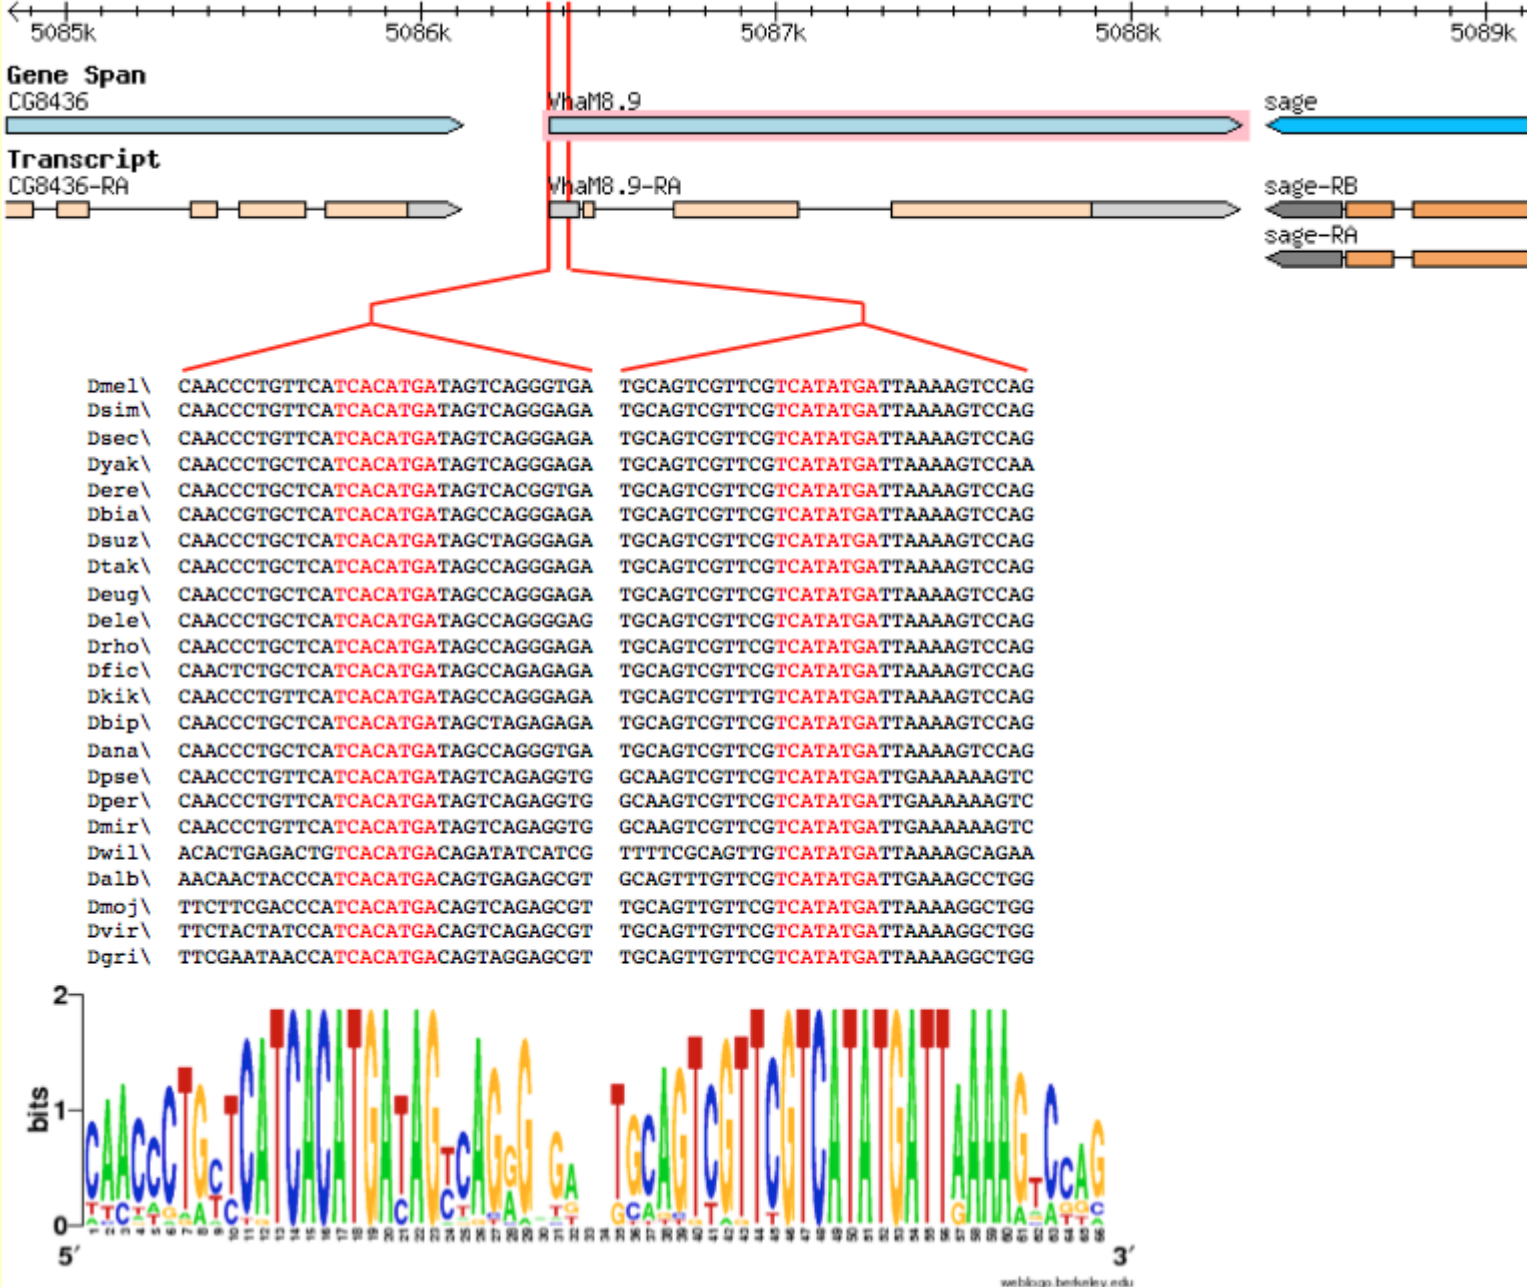

## VhaM8.9 (CG8444) gene structure comparison in Drosophila species:

Key: UTR region, CDS region

| Species                         | VhaM8.9<br>Atp6ap2<br>orthologs | 5'exon |    | intron | exon | intron | exon3' |     | Extended CLEAR region                                                   | Position    | bps<br>from<br>TSS |
|---------------------------------|---------------------------------|--------|----|--------|------|--------|--------|-----|-------------------------------------------------------------------------|-------------|--------------------|
| <i>Drosophila_melanogaster</i>  | <a href="#">Dmel\VhaM8.9</a>    | 84     | 43 | 223    | 353  | 262    | 567    | 421 | caaccctgttcaTCACATGAtagtcagggtga<br>tgcagtcgttcgTCATATGAttaaaagtccag    | 5'<br>5UTR  | -1<br>52           |
| <i>Drosophila_simulans</i>      | <a href="#">Dsim\GD18602</a>    |        | 43 | 223    | 353  | 251    | 567    |     | caaccctgttcaTCACATGAtagtcagggaga<br>tgcagtcgttcgTCATATGAttaaaagtccag    | 5'<br>5UTR? |                    |
| <i>Drosophila_sechellia</i>     | <a href="#">Dsec\GM23791</a>    |        | 43 | 223    | 353  | 265    | 567    |     | caaccctgttcaTCACATGAtagtcagggaga<br>tgcagtcgttcgTCATATGAttaaaagtccag    | 5'<br>5UTR? |                    |
| <i>Drosophila_yakuba</i>        | <a href="#">Dyak\GE25938</a>    |        | 43 | 226    | 353  | 359    | 567    |     | caaccctgtcaTCACATGAtagtcagggaga<br>tgcagtcgttcgTCATATGAttaaaagtccaa     | 5'<br>5UTR? |                    |
| <i>Drosophila_erecta</i>        | <a href="#">Dere\GG15974</a>    |        | 43 | 217    | 353  | 230    | 567    |     | caaccctgtctcaTCACATGAtagtcacgggtga<br>tgcagtcgttcgTCATATGAttaaaagtccag  | 5'<br>5UTR? |                    |
| <i>Drosophila_biarmipes</i>     | <a href="#">Dbia\VhaM8.9</a>    |        | 43 | 224    | 353  | 436    | 567    |     | caaccgtgtcaTCACATGAtagccaggggaga<br>tgcagtcgttcgTCATATGAttaaaagtccag    | 5'<br>5UTR? |                    |
| <i>Drosophila_suzukii</i>       | <a href="#">Dsuz\VhaM8.9</a>    |        | 43 | 223    | 353  | 541    | 567    |     | caaccctgtctcaTCACATGAtagctagggaga<br>tgcagtcgttcgTCATATGAttaaaagtccag   | 5'<br>5UTR? |                    |
| <i>Drosophila_takahashii</i>    | <a href="#">Dtak\VhaM8.9</a>    |        | 43 | 218    | 353  | 1418   | 567    |     | caaccctgtcaTCACATGAtagccaggggaga<br>tgcagtcgttcgTCATATGAttaaaagtccag    | 5'<br>5UTR? |                    |
| <i>Drosophila_eugracilis</i>    | <a href="#">Deug\VhaM8.9</a>    |        | 43 | 187    | 353  | 260    | 567    |     | caaccctgtctcaTCACATGAtagccaggggaga<br>tgcagtcgttcgTCATATGAttaaaagtccag  | 5'<br>5UTR? |                    |
| <i>Drosophila_elegans</i>       | <a href="#">Dele\VhaM8.9</a>    |        | 43 | 214    | 353  | 913    | 567    |     | caaccctgtctcaTCACATGAtagccagggggag<br>tgcagtcgttcgTCATATGAttaaaagtccag  | 5'<br>5UTR? |                    |
| <i>Drosophila_rhopaloea</i>     | <a href="#">Drho\VhaM8.9</a>    |        | 43 | 215    | 353  | 485    | 567    |     | caaccctgtctcaTCACATGAtagccaggggaga<br>tgcagtcgttcgTCATATGAttaaaagtccag  | 5'<br>5UTR? |                    |
| <i>Drosophila_ficusphila</i>    | <a href="#">Dfic\VhaM8.9</a>    |        | 43 | 222    | 353  | 232    | 570    |     | caactctgtctcaTCACATGAtagccagagagaga<br>tgcagtcgttcgTCATATGAttaaaagtccag | 5'<br>5UTR? |                    |
| <i>Drosophila_kikkawai</i>      | <a href="#">Dkik\VhaM8.9</a>    |        | 43 | 235    | 353  | 65     | 570    |     | caaccctgttcaTCACATGAtagccaggggaga<br>tgcagtcgtttgTCATATGAttaaaagtccag   | 5'<br>5UTR? |                    |
| <i>Drosophila_bipectinata</i>   | <a href="#">Dbip\VhaM8.9</a>    |        | 43 | 207    | 353  | 67     | 567    |     | caaccctgtctcaTCACATGAtagctagagaga<br>tgcagtcgttcgTCATATGAttaaaagtccag   | 5'<br>5UTR? |                    |
| <i>Drosophila_ananassae</i>     | <a href="#">Dana\GF16587</a>    |        | 43 | 216    | 353  | 59     | 567    |     | caaccctgtctcaTCACATGAtagccagggtga<br>tgcagtcgttcgTCATATGAttaaaagtccag   | 5'<br>5UTR? |                    |
| <i>Drosophila_pseudoobscura</i> | <a href="#">Dpse\GA21083</a>    |        | 43 | 226    | 353  | 71     | 567    | 386 | caaccctgttcaTCACATGAtagtcagaggtg<br>gcaagtcgttcgTCATATGAttgaaaaagtc     | 5'<br>5UTR? |                    |
| <i>Drosophila_persimilis</i>    | <a href="#">Dper\GL13947</a>    |        | 43 | 226    | 353  | 71     | 567    |     | caaccctgttcaTCACATGAtagtcagaggtg<br>gcaagtcgttcgTCATATGAttgaaaaagtc     | 5'<br>5UTR? |                    |
| <i>Drosophila_miranda</i>       | <a href="#">Dmir\VhaM8.9</a>    |        | 43 | 226    | 353  | 71     | 567    |     | caaccctgttcaTCACATGAtagtcagaggtg<br>gcaagtcgttcgTCATATGAttgaaaaagtc     | 5'<br>5UTR? |                    |

|                              |                              |  |    |     |     |    |     |  |                                                                      |             |  |
|------------------------------|------------------------------|--|----|-----|-----|----|-----|--|----------------------------------------------------------------------|-------------|--|
| <i>Drosophila_willistoni</i> | <a href="#">Dwil\GK14261</a> |  | 43 | 225 | 353 | 63 | 573 |  | acactgagactgTCACATGAcagatatcatcg<br>ttttcgacgttgTCATATGAttaaaagcagaa | 5'<br>5UTR? |  |
| <i>Drosophila_albomicans</i> | <a href="#">Dalb\VhaM8.9</a> |  | 43 | 237 | 353 | 68 | 567 |  | aacaactacccaTCACATGAcagtgagagcgt<br>gcagttgttcgTCATATGAttgaaagcctgg  | 5'<br>5UTR? |  |
| <i>Drosophila_mojavensis</i> | <a href="#">Dmoj\GI10428</a> |  | 43 | 237 | 353 | 58 | 564 |  | ttcttcgacccaTCACATGAcagtcagagcgt<br>tgcagttgttcgTCATATGAttaaaagcctgg | 5'<br>5UTR? |  |
| <i>Drosophila_virilis</i>    | <a href="#">Dvir\GJ10644</a> |  | 43 | 245 | 353 | 64 | 564 |  | ttctactatccaTCACATGAcagtcagagcgt<br>tgcagttgttcgTCATATGAttaaaagcctgg | 5'<br>5UTR? |  |
| <i>Drosophila_grimshawi</i>  | <a href="#">Dgri\GH14333</a> |  | 43 | 231 | 353 | 57 | 567 |  | ttcgataaccaTCACATGAcagtaggagcgt<br>tgcagttgttcgTCATATGAttaaaagcctgg  | 5'<br>5UTR? |  |
