# Supplementary material for: Structural and Comparative Analyses of Insects Suggest the Presence of an Ultra-Conserved Regulatory Element of the Genes Encoding Vacuolar-Type ATPase Subunits and Assembly Factors
Source: MDPI journal article supplement (doi:10.3390/biology12081127), 2023-08-13
Supplement: s1 [file s1]

**Supplementary Table S1.** Distribution of the conserved CLEAR elements in the transcriptional unit of V-type ATPase genes in *D. melanogaster*.

| Gene cluster | Gene name             | Predicted function                       | CLEAR element <sup>^</sup>                                                                                            | Position*                                  |
|--------------|-----------------------|------------------------------------------|-----------------------------------------------------------------------------------------------------------------------|--------------------------------------------|
| Atp6v1A      | Vha68-2<br>(CG3762)   | subunit A                                | cttgTCAGCTGAcgcc<br>tttgTCAGCTGAcggc<br>tctgTCACGTGAaacg<br>cttgTCAGCTGAcaga                                          | 470<br>691<br>981<br>1177                  |
| Atp6v1B      | Vha55<br>(CG17369)    | subunit B                                | cgggTCATGTGAcggc<br>gccgTCACATGAccgt<br>acagTCAGCTGAcata<br>acttTCATGTGAgcat                                          | 45<br>701<br>1052<br>1141                  |
| Atp6v1C      | Vha44<br>(CG8048)     | subunit C                                | gccaTCACGTGAatct<br>actgTCATGTGActgt                                                                                  | -40<br>565                                 |
| Atp6v1D      | Vha36-1<br>(CG8186)   | subunit D                                | agggTCATCTGActtg<br>acagTCACATGAcagc                                                                                  | 1142<br>1193                               |
| Atp6v1E      | Vha26<br>(CG1088)     | subunit E                                | gaaaTCATATGAtcga<br>caggTCATGTGAactt<br>ctggTCATGTGAcacg<br>gttaTCATGTGAcaca<br>tgtgTCATGTGAtaga                      | 48<br>447<br>614<br>794<br>-3              |
| Atp6v1F      | Vha14-1<br>(CG8210)   | subunit F                                |                                                                                                                       |                                            |
| Atp6v1G      | Vha13<br>(CG6213)     | subunit G                                | ttcgTCATATGAcatt<br>tgggTCACATGAtgtg                                                                                  | 9<br>317                                   |
| Atp6v1H      | VhaSFD<br>(CG17332)   | subunit H                                | ccagTCAGCTGAattt                                                                                                      | 36                                         |
| Atp6v0a      | Vha100-2<br>(CG18617) | subunit a                                | tctaTCATGTGAtctt                                                                                                      | 685                                        |
| Atp6v0b      | VhaPPA1-1<br>(CG7007) | subunit b                                | tacgTCATGTGAttgt                                                                                                      | 47                                         |
| Atp6v0c      | Vha16-1<br>(CG3161)   | subunit c                                | ctaaTCACGTGAggtga<br>gcggTCATGTGAggct<br>acgaTCACATGAggtc<br>cgaaTCACATGActcg<br>accgTCACATGAaact<br>gcgaTCATGTGActgc | 130<br>165<br>2528<br>4381<br>4527<br>4906 |
| Atp6v0d      | VhaAC39-1<br>(CG2934) | subunit d                                | aaaaTCATATGActtg<br>tgggTCACATGAccag                                                                                  | 47<br>437                                  |
| Atp6v0e      | VhaM9.7-b<br>(CG7625) | subunit e                                | tccgTCATGTGAtatt                                                                                                      | 38                                         |
| Atp6ap1      | VhaAC45<br>(CG8029)   | accessory protein 1                      | cgcaTCACATGAccgt                                                                                                      | -4                                         |
| Atp6ap2      | VhaM8.9<br>(CG8444)   | accessory protein 2                      | ttcaTCACATGAtagt<br>ttcgTCATATGAttaa                                                                                  | -1<br>52                                   |
| Vma21        | CG5969                | assembly integral membrane               | tttaTCATGTGAtttg                                                                                                      | -11                                        |
| Tmem199      | CG7071                | vacuolar ER assembly factor,<br>Vma12    | tttcTCATGTGAcagc                                                                                                      | 6                                          |
| CCDC115      | CG14671               | V-type ATPase complex<br>assemblyCCDC115 | gcgaTCATATGAttga                                                                                                      | -12                                        |

<sup>^</sup>Only canonical CLEAR elements are reported. \*Position refers to the transcriptional start site
