# Supplementary material for: Structural and Comparative Analyses of Insects Suggest the Presence of an Ultra-Conserved Regulatory Element of the Genes Encoding Vacuolar-Type ATPase Subunits and Assembly Factors
Source: MDPI journal article supplement (doi:10.3390/biology12081127), 2023-08-13
Supplement: s1 [file s1]

|                              |                                                                    |
|------------------------------|--------------------------------------------------------------------|
| Gene Cluster ID              | Atp6v1F                                                            |
| Predicted function           | ATPase, H <sup>+</sup> transporting, lysosomal 14kDa, V1 subunit F |
| Drosophila melanogaster gene | Vha14-1 (CG8210)                                                   |
| FlyBase ID                   | <a href="#">FBgn0262512</a>                                        |

#### Atp6v1F CLEAR element conservation:

**5' / 5' UTR**

Dmel\ [ACCGCAACTGTGTCATGTGA](#) TAGAGACCAGCT  
Dwil\ TCGTGACAGATGTCAGCTGCCACTTTTTTCT  
Mdom\ TTTTGACGTTTGTCA<sup>TC</sup>TGACCAAAGAAGAAA  
Ccap\ ATTTGACGTATGTCA<sup>GC</sup>TGACCATTTGCGAAC  
Gmor\ TTTTGACATAAGTCATGAGA<sup>CT</sup>TAAATTTCTA  
Llon\ GTGCCCCAAAAGTCAGCTGATCTCTCAGAAAA  
Ppap\ CACGTCGCAAAGTCAGCTGACACTTCTTGTTT

Agam\ GTTGTAAGTCAGTCAGGTGATGTTTTCTCTT  
Aara\ GTTGTAAGTCAGTCAGGTGATGTTTTCTCTT  
Aqan\ GTTGTAAGTCAGTCAGGTGATGTTTTCTCTT  
Achr\ GGTGTAATCAGTCAGGTGATGTTTTCTCAT  
Aepi\ GGTGTAAGTCAGTCAGGTGATGTTTTCTCTT  
Amin\ GATCGTATTCAGTCAGGTGATTTTTCTCCC  
Afun\ GGTGTAATTCAGTCAGGTGATTTTTCTTCT  
Aste\ GATTGTTTTTCAGTCAGGTGATTTTTCTCCA  
Adir\ GGTGTAAGTCAGTCAGGTGATGTTTCTCAG  
Aalb\ CCCCTTCTTCGGTCAGGTGACGTTTTCTCAT  
Adar\ CCCCCTCGTTCGGTCAGGTGACGTTTTCTCAA  
Aaeg\ ATCAATTTTGTGATCAGGTGATATTTTCCTT  
Cqui\ TTTTGCTTTTGAATCAGGTGATATTTTCCT

Mdes\ TTGTGACACCAGTCAGGTGACAGCTTAGGAGA  
Tcas\ AGGTGCTTTAAGTCAGGTGACAGCTTGAATA  
Dpon\ CAGCTGATCTTGTCAGGTGACAATAATTAAAT  
Bmor\ GTCAAAATTGAGTCAGGTGACGAGCCCTGTG  
Msex\ ACAAAATTCGTAGTCAGGTGACGAGCCCTGTG  
Dple\ AAAAAATCATAAGTCAGGTGATGATTTCTTGTG  
Hmel\ AAAAAATCATAAGTCAGGTGATGATTTCTTGTG  
Pxyl\ AAAAAATCCATAGTCAGGTGACGATCCCGTGTG

Amel\ AGGTGTGACTTGTCAGCTGATATATTATCAAG  
Aflo\ AGGTGTGACTTGTCAGCTGATATATTATCAAG  
Bter\ AGGTGTGACTTGTCAGCTGATGATCGTCAGG  
Bimp\ AGGTGTGACTTGTCAGCTGATGATCGTCAGG  
Mrot\ AGGCGTGACTTGTCAGCTGATGATTAAGCTGT  
Aech\ CTATACGTTTCGTCAGCTGACGTGCAAGCGAC

Acep\ CTGTGGTATACA TCAGCTGA CGTGCAAGCGAC  
 Hsal\ AGGTGTGACTAG TCAGCTGA TGTCCAACATAA  
 Lhum\ TAGCGTAAC TTG TCAGCTGA GTTCGATAAAA  
 Sinv\ TGGTGTGGTTCG TCAGCTGA GTCTTACTGTT  
 Cflo\ TGGTGTGGCTCG TCAGCTGA TCGCGACAGAT  
 Pbar\ CTGACCACGTGA TCACGTGA CATTTGTCTCCC  
 Ngir\ GACGGTCGGAGG TCAGCTGA TTTCTGCTAGCA  
 Nvit\ GACGGTCGGAGG TCAGCTGA TTTCTGCTAGCA  
 Nlon\ GACGGTCGGAGG TCAGCTGA TTTCTGCTAGCA  
  
 Phum\ tcagtaaacaaa TCATCTGA tatttcacat  
 Phum\ atttagtttaaa TCACCTGA ctaaatacagatt  
 Lful\ ACCCACAATAAAG CAGCTGAGGTTTTTAAATA  
 Dpul\ ttttttcacgag TCATGTGA acagttccctttt  
 Isca\ ctgatcggaact TCAGCTGA gcgtacgggtgt

Atp6v1F gene structure comparison:

Key: UTR region, CDS region INTRON

| Order                   | Species                          | Atp6v1F orthologs                                          | 5'exon | intron | exon | intron | exon | intron | exon | intron | exon3' |     | Extended CLEAR region            | Position                         | bps from TSS |    |
|-------------------------|----------------------------------|------------------------------------------------------------|--------|--------|------|--------|------|--------|------|--------|--------|-----|----------------------------------|----------------------------------|--------------|----|
| Diptera (Drosophilidae) | <i>Drosophila_melanogaster</i>   | <a href="#">Dmel\Vha14-1</a>                               | 98     | 375    |      |        |      |        |      |        |        | 182 |                                  | accgcaactgtgTCATGTGAtagagaccagct | 5'           | -3 |
|                         | <i>Drosophila_willistoni</i>     | <a href="#">Dwil\GK12172</a>                               |        | 54     | 407  | 82     | 90   | 206    |      | 60     | 33     |     | tcgtgacagatgTCAGCTGAccactttttct  | 5'                               |              |    |
| Diptera (Muscidae)      | <i>Musca_domestica</i>           | <a href="#">Mdom\Atp6v1F</a>                               |        | 54     | 67   | 82     | 61   | 206    |      | 72     | 33     |     | tttgacgtttgTCATCTGAccaaagaagaaa  | 5'                               | >-54         |    |
| Diptera (Tephritidae)   | <i>Ceratitis_capitata</i>        | <a href="#">Ccap\Atp6v1F</a>                               |        | 51     | 59   | 82     | 63   | 206    |      | 60     | 30     | 122 | atttgacgtatgTCAGCTGAccatttgcgaac | 5'                               | >-86         |    |
| Diptera (Glossinidae)   | <i>Glossina_morsitans</i>        | <a href="#">Gmor\Atp6v1F</a>                               | 53     | 54     | 63   | 82     | 63   | 206    |      | 57     | 33     | 122 | tttgacataagTCATGAGActtaatttcta   | 5'                               | 16           |    |
| Diptera (Psychodidae)   | <i>Lutzomyia_longipalpis</i>     | <a href="#">Llon\Atp6v1F</a>                               |        | 54     | 57   | 82     | 68   | 206    |      | 59     | 45     |     | gtccccaaaagTCAGCTGAtctctcagaaaa  | 5'                               | >-41         |    |
|                         | <i>Phlebotomus_papatasi</i>      | <a href="#">Ppap\Atp6v1F</a>                               |        | 54     | 57   | 82     | 61   | 206    |      | 58     | 45     |     | cacgtgcgaagTCAGCTGAcacttctgttt   | 5'                               | >-44         |    |
|                         |                                  |                                                            |        |        |      |        |      |        |      |        |        |     |                                  |                                  |              |    |
| Diptera (Culicidae)     | <i>Anopheles_gambiae</i>         | <a href="#">Agam\Atp6v1F</a><br><a href="#">AGAP002473</a> | 83     | 54     | 158  | 82     | 86   | 206    |      | 86     | 42     | 224 | gttgtaagtcagTCAGGTGAtgttttctctt  | 5'                               | -9           |    |
|                         | <i>Anopheles_arabiensis</i>      | <a href="#">Aara\Atp6v1F</a>                               |        | 54     | 159  | 82     | 86   | 206    |      | 86     | 42     |     | gttgtaagtcagTCAGGTGAtgttttctctt  | 5'                               | >-93         |    |
|                         | <i>Anopheles_quadriannulatus</i> | <a href="#">Aqan\Atp6v1F</a>                               |        | 54     | 158  | 82     | 89   | 206    |      | 86     | 42     |     | gttgtaagtcagTCAGGTGAtgttttctctt  | 5'                               | >-93         |    |
|                         | <i>Anopheles_christyi</i>        | <a href="#">Achr\Atp6v1F</a>                               |        | 54     | 135  | 82     | 69   | 206    |      | 85     | 42     |     | ggttgtaatcagTCAGGTGAtgttttcgcac  | 5'                               | >-91         |    |

|                            |                                |                                                              |         |             |     |    |      |              |     |     |     |                                                                      |                                 |                                  |            |      |
|----------------------------|--------------------------------|--------------------------------------------------------------|---------|-------------|-----|----|------|--------------|-----|-----|-----|----------------------------------------------------------------------|---------------------------------|----------------------------------|------------|------|
|                            | <i>Anopheles_epiroticus</i>    | <a href="#">Aepi\Atp6v1F</a>                                 |         | 54          | 145 | 82 | 92   | 206          | 84  | 42  |     | ggttgtagtcagTCAGGTGAtgttttctctt                                      | 5'                              | >-87                             |            |      |
|                            | <i>Anopheles_minimus</i>       | <a href="#">Amin\Atp6v1F</a>                                 |         | 54          | 147 | 82 | 75   | 206          | 67  | 42  |     | gatcgatttcagTCAGGTGAtttttctccc                                       | 5'                              | >-105                            |            |      |
|                            | <i>Anopheles_funestus</i>      | <a href="#">Afun\Atp6v1F</a>                                 |         | 54          | 137 | 82 | 97   | 206          | 66  | 42  |     | ggtegtattcagTCAGGTGAtatttttctct                                      | 5'                              | >-104                            |            |      |
|                            | <i>Anopheles_stephensi</i>     | <a href="#">Aste\Atp6v1F</a>                                 |         | 54          | 162 | 82 | 73   | 206          | 75  | 42  |     | gattgttttcagTCAGGTGAcatttttctcca                                     | 5'                              | >-103                            |            |      |
|                            | <i>Anopheles_dirus</i>         | <a href="#">Adir\Atp6v1F</a>                                 |         | 54          | 161 | 82 | 70   | 206          | 77  | 42  |     | ggttgtagtcagTCAGGTGAttggtttctcag                                     | 5'                              | >-124                            |            |      |
|                            | <i>Anopheles_nili</i>          | <a href="#">Anil\Atp6v1F</a>                                 |         | 54          | 171 | 82 | 74   | 206          | 57  | 42  |     | gatctattgcagTCAGGTGAcatccgagtttt                                     | 5'                              | >-109                            |            |      |
|                            | <i>Anopheles_albimanus</i>     | <a href="#">Aalb\Atp6v1F</a>                                 |         | 54          | 113 | 82 | 98   | 206          | 68  | 42  |     | ccccctctcggTCAGGTGAcgtttttctcat                                      | 5'                              | >-113                            |            |      |
|                            | <i>Anopheles_darlingi</i>      | <a href="#">Adar\Atp6v1F</a>                                 |         | 54          | 113 | 82 | 88   | 206          | 62  | 42  | 421 | ccccctcgtcggTCAGGTGAcgtttttctcaa                                     | 5'                              | >-109                            |            |      |
|                            | <i>Aedes_aegypti</i>           | <a href="#">Aaeg\Atp6v1F</a><br><a href="#">AAEL002464</a>   | 128     | 54          | 102 | 82 | 108  | 206          | 64  | 42  | 421 | atcaattttgaTCAGGTGAcatattttcctt                                      | 5'UTR                           | 2                                |            |      |
|                            | <i>Culex_pipiens_qui.</i>      | <a href="#">Cqui\Atp6v1F</a><br><a href="#">CPIJ016432</a>   |         | 54          | 118 | 82 | 63   | 248 (206+42) |     |     |     | 175                                                                  | ttttgctttgaTCAGGTGAcatatttttctt | 5'                               | >-116      |      |
| Diptera<br>(Cecidomyiidae) | <i>Mayetiola_destructor</i>    | <a href="#">Mdes\Atp6v1F</a>                                 |         | 136 (54+82) |     |    | 119  | 206          | 118 | 36  |     | ttgtgacaccagTCAGGTGAcagcttaggaga                                     | 5'                              | >-131                            |            |      |
| Lepidoptera                | <i>Bombyx_mori</i>             | <a href="#">Bmor\Atp6v1F</a>                                 | 98      | 54          | 121 | 82 | 663  | 206          | 595 | 33  | 375 | gtcaaaattgagTCAGGTGAcgagcccttg                                       | 5'UTR                           | 26                               |            |      |
|                            | <i>Manduca sexta</i>           | <a href="#">Msex\Atp6v1F</a>                                 |         | 54          | 147 | 82 | 1739 | 206          | 437 | 33  |     | acaaatcgtagTCAGGTGAcgagcccttg                                        | 5'                              | >-64                             |            |      |
|                            | <i>Danaus_plexippus</i>        | <a href="#">Dple\Atp6v1F</a>                                 |         | 54          | 127 | 82 | 77   | 206          | 275 | 33  |     | aaaaatctatagTCAGGTGAtgatttcttg                                       | 5'                              | >-65                             |            |      |
|                            | <i>Heliconius_melpomene</i>    | <a href="#">Hmel\Atp6v1F</a>                                 |         | 54          | 142 | 82 | 134  | 206          | 540 | 33  |     | aaaaatctatagTCAGGTGAtgatttcttg                                       | 5'                              | >-67                             |            |      |
|                            | <i>Plutella_xylostella</i>     | <a href="#">Pxy\Atp6v1F</a>                                  |         | 54          | 127 | 82 | 188  | 206          | 232 | 33  |     | aaaaatccatagTCAGGTGAcgatcccgtg                                       | 5'                              | >-72                             |            |      |
|                            |                                |                                                              |         |             |     |    |      |              |     |     |     |                                                                      |                                 |                                  |            |      |
| Strepsiptera               | <i>Mengenilla_moldrzyki</i>    | <a href="#">Mmol\Atp6v1F</a>                                 |         | 363         |     |    |      |              |     |     |     | ND                                                                   |                                 |                                  |            |      |
| Coleoptera                 | <i>Tribolium_castaneum</i>     | <a href="#">Tcas\Atp6v1F</a><br><a href="#">LOC663894</a>    |         | 54          | 51  | 82 | 47   | 206          | 58  | 30  |     | aggtgctttaagTCAGGTGAcagtcttgaata                                     | 5'UTR?                          | >-40                             |            |      |
|                            | <i>Dendroctonus_ponderosae</i> | <a href="#">Dpon\Atp6v1F</a>                                 |         | 54          | 57  | 82 | 115  | 206 (83+123) | 92  | 30  |     | gtcaacacacagTCAGCTGAtctgtcagggtg<br>cagctgatcttgTCAGGTGAcaataattaaat | 5'UTR?                          | >-57<br>>-44                     |            |      |
|                            |                                |                                                              |         |             |     |    |      |              |     |     |     |                                                                      |                                 |                                  |            |      |
| Hymenoptera                | <i>Apis_mellifera</i>          | <a href="#">Amel\Atp6v1F</a><br><a href="#">GB18107</a>      | 343     | 54          | 119 | 82 | 140  | 83           | 247 | 123 | 191 | 30                                                                   | 100                             | aggtgtgacttgTCAGCTGAtatattatcaag | 5'UTR      | 262  |
|                            | <i>Apis_florea</i>             | <a href="#">Aflo\Atp6v1F</a>                                 |         | 54          | 88  | 82 | 78   | 83           | 266 | 123 | 188 | 30                                                                   |                                 | aggtgtgacttgTCAGCTGAtatattatcaag | 5'UTR?     | >-73 |
|                            | <i>Bombus_terrestris</i>       | <a href="#">Bter\Atp6v1F</a><br><a href="#">LOC100651333</a> | 96+90+6 | 54          | 66  | 82 | 181  | 83           | 308 | 123 | 354 | 30                                                                   | 707                             | aggtgtgacttgTCAGCTGAtgtatcgtcagg | intron 1-2 | 110  |
|                            | <i>Bombus_impatiens</i>        | <a href="#">Bimp\Atp6v1F</a>                                 |         | 54          | 66  | 82 | 178  | 83           | 294 | 123 | 402 | 30                                                                   |                                 | aggtgtgacttgTCAGCTGAtgtatcgtcaag | 5'         | >-74 |

|              |                               |                                              |     |             |      |    |      |              |      |     |      |    |     |                                                                    |           |               |
|--------------|-------------------------------|----------------------------------------------|-----|-------------|------|----|------|--------------|------|-----|------|----|-----|--------------------------------------------------------------------|-----------|---------------|
|              | <i>Megachile_rotundata</i>    | <a href="#">Mrot\Atp6v1F</a>                 |     | 54          | 65   | 82 | 203  | 83           | 304  | 123 | 306  | 30 |     | aggcgtgactgtTCAGCTGAtgcattagctgt                                   | 5'        | >-69          |
|              | <i>Acromyrmex_echinatior</i>  | <a href="#">Aech\Atp6v1F</a>                 |     | 54          | 941  | 82 | 259  | 83           | 289  | 123 | 123  | 30 |     | ctatacgtttcgTCAGCTGAcgtgcaagcgac                                   | 5'        | >-76          |
|              | <i>Atta_cephalotes</i>        | <a href="#">Acep\Atp6v1F</a>                 |     | 54          | 937  | 82 | 262  | 83           | 267  | 123 | 118  | 30 |     | ctgtggtatacaTCAGCTGAcgtgcaagcgac                                   | 5'        | >-182         |
|              | <i>Solenopsis_invicta</i>     | <a href="#">Sinv\Atp6v1F</a>                 |     | 54          | 210  | 82 | 249  | 83           | 154  | 123 | ND   | ND |     | tgggtgtggttcgTCAGCTGAtgtcttactgtt                                  | 5'        | >-77          |
|              | <i>Camponotus_floridanus</i>  | <a href="#">Cflo\Atp6v1F</a>                 |     | 54          | 1431 | 82 | 3431 | 83           | 2439 | 123 | 107  | 30 |     | tgggtgtggtcgTCAGCTGAtgcgcgacagat                                   | 5'        | >-101         |
|              | <i>Harpegnathos_saltator</i>  | <a href="#">Hsal\Atp6v1F</a>                 |     | 54          | 297  | 82 | 494  | 83           | 408  | 123 | 114  | 33 |     | aggtgtgactagTCAGCTGAtgtccaacataa                                   | 5'        | >-96          |
|              | <i>Pogonomyrmex_barbatus</i>  | <a href="#">Pbar\Atp6v1F</a>                 |     | 54          | 143  | 82 | 263  | 83           | 136  | 123 | 105  | 30 |     | ctgaccacgtgaTCACGTGAcatttgtctccc                                   | 5'        | >-561         |
|              | <i>Linepithema_humile</i>     | <a href="#">LhumAtp6v1F</a>                  |     | 54          | 416  | 82 | 358  | 83           | 481  | 123 | 110  | 33 |     | tagcgtaaactgTCAGCTGAtgttcgataaaa                                   | 5'        | >-109         |
|              | <i>Nasonia_giraulti</i>       | <a href="#">Ngir\Atp6v1F</a>                 |     | 54          | 116  | 82 | 113  | 83           | 85   | 123 | ND   | 30 |     | gacggtcggaggTCAGCTGAtttctgctagca                                   | 5'        | >-111         |
|              | <i>Nasonia_longicornis</i>    | <a href="#">Nlon\Atp6v1F</a>                 |     | 54          | 116  | 82 | 113  | 83           | 85   | 123 | ND   | 30 |     | gacggtcggaggTCAGCTGAtttctgctagca                                   | 5'        | >-111         |
|              | <i>Nasonia_vitripennis</i>    | <a href="#">Nvit\atp6v1F<br/>NV14793</a>     | 568 | 54          | 116  | 82 | 113  | 83           | 85   | 123 | 90   | 30 | 590 | gacggtcggaggTCAGCTGAtttctgctagca                                   | 5'UTR     | 449           |
|              |                               |                                              |     |             |      |    |      |              |      |     |      |    |     |                                                                    |           |               |
| Hemiptera    | <i>Acyrtosiphon_pisum</i>     | <a href="#">Apis\Atp6v1F<br/>ACYPI000082</a> | 128 | 54          | 157  | 82 | 59   | 83           | 107  | 123 | 77   | 27 |     | ND                                                                 |           |               |
|              | <i>Rhodnius_prolixus</i>      | <a href="#">Rpro\Atp6v1F</a>                 |     | 54          | 138  | 82 | 73   | 83           | 75   | 123 | 121  | 30 |     | ND                                                                 |           |               |
| Phthiraptera | <i>Pediculus_humanus</i>      | <a href="#">Phum\Atp6v1F<br/>PHUM390990</a>  |     | 136 (54+82) |      |    | 91   | 206 (83+123) |      |     | 167  | 30 |     | tcagtaacaaaTCATCTGAtatttcatcaat<br>atttagtttaaTCACCTGActaaatcagatt | 5'<br>5'  | >-101<br>>-55 |
| Odonata      | <i>Ladona_fulva</i>           | <a href="#">Lful\Atp6v1F</a>                 |     | 369         |      |    |      |              |      |     |      |    |     | accacaataaagCAGCTGAggtttttaata                                     | 5'        | >-39          |
| Crustacea    | <i>Daphnia_pulex</i>          | <a href="#">Dpul\Atp6v1F</a>                 |     | 51          | 73   | 82 | 70   | 83           | 60   | 123 | 60   | 30 |     | tttttcacgagTCATGTGAcagttccctttt                                    | 5'        | >-83          |
| Ixodida      | <i>Ixodes_scapularis</i>      | <a href="#">Isca\Atp6v1F</a>                 | 132 | 45          | 374  | 82 | 80   | 83           | ND   | 123 | ND   | 30 | 320 | ctgatcggacttTCAGCTGAgcgtacgggtgt                                   | 5'        | 28            |
|              |                               |                                              |     |             |      |    |      |              |      |     |      |    |     |                                                                    |           |               |
|              | <i>Homo_sapiens</i>           | <a href="#">ATP6V1F</a>                      | 102 | 158         |      |    | 2314 | 202          |      |     |      |    | 271 | agccccccaccTCACATGAtcgtgtgtcatg                                    | intron1-2 | 459           |
| Cnidaria     | <i>Nematostella_vectensis</i> | <a href="#">Nvec\Atp6v1F</a>                 | 18  | 66          | 72   | 82 | 622  | 83           | 246  | 123 | 1000 | 30 | 344 | gatgggtgaagaCCACATGAccatttcggt                                     | 5'        | 21            |
| Placozoa     | <i>Trichoplax_adhaerens</i>   | <a href="#">Tadh\Atp6v1F</a>                 |     | 69          | 74   | 82 | 76   | 83           | 632  | 123 | 322  | 30 |     | ataggtagagcaTCACGTGAtggacatcggat                                   | 5'        | >-138         |
