# Supplementary material for: Structural and Comparative Analyses of Insects Suggest the Presence of an Ultra-Conserved Regulatory Element of the Genes Encoding Vacuolar-Type ATPase Subunits and Assembly Factors
Source: MDPI journal article supplement (doi:10.3390/biology12081127), 2023-08-13
Supplement: s1 [file s1]

|                                |                                |                                |                           |        |        |        |      |        |      |        |      |        |      |        |      |        |      |        |               |                                 |      |        |      |        |      |        |      |        |      |        |      |        |      |        |          |        |      |        |      |        |      |        |            |         |      |        |      |        |      |               |                    |        |      |        |      |        |      |        |      |        |      |        |      |        |      |        |      |        |      |        |      |        |      |        |      |        |      |        |      |        |      |        |      |        |      |        |      |        |      |        |      |        |      |        |      |        |      |        |      |        |      |        |      |        |      |        |      |        |      |        |      |        |      |        |      |        |      |        |      |        |      |        |      |        |      |        |      |        |      |        |      |        |      |        |      |        |      |        |      |        |      |        |      |        |      |        |      |        |      |        |      |        |      |        |      |        |      |        |      |        |      |        |      |        |      |        |      |        |      |        |      |        |      |        |      |        |      |        |      |        |      |        |      |        |      |        |      |        |      |        |      |        |      |        |      |        |      |        |      |        |      |        |      |        |      |        |      |        |      |        |      |        |      |        |      |        |      |        |      |        |      |        |      |        |      |        |      |        |      |        |      |        |      |        |      |        |      |        |      |        |      |        |      |        |      |        |      |        |      |        |      |        |      |        |      |        |      |        |      |        |      |        |      |        |      |        |      |        |      |        |      |        |      |        |      |        |      |        |      |        |      |        |      |        |      |        |      |        |      |        |      |        |      |        |      |        |      |        |      |        |      |        |      |        |      |        |      |        |      |        |      |        |      |        |      |        |      |        |      |        |      |        |      |        |      |        |      |        |      |        |      |        |      |        |      |        |      |        |      |        |      |        |      |        |      |        |      |        |      |        |      |        |      |        |      |        |      |        |      |        |      |        |      |        |      |        |      |        |      |        |      |        |      |        |
|--------------------------------|--------------------------------|--------------------------------|---------------------------|--------|--------|--------|------|--------|------|--------|------|--------|------|--------|------|--------|------|--------|---------------|---------------------------------|------|--------|------|--------|------|--------|------|--------|------|--------|------|--------|------|--------|----------|--------|------|--------|------|--------|------|--------|------------|---------|------|--------|------|--------|------|---------------|--------------------|--------|------|--------|------|--------|------|--------|------|--------|------|--------|------|--------|------|--------|------|--------|------|--------|------|--------|------|--------|------|--------|------|--------|------|--------|------|--------|------|--------|------|--------|------|--------|------|--------|------|--------|------|--------|------|--------|------|--------|------|--------|------|--------|------|--------|------|--------|------|--------|------|--------|------|--------|------|--------|------|--------|------|--------|------|--------|------|--------|------|--------|------|--------|------|--------|------|--------|------|--------|------|--------|------|--------|------|--------|------|--------|------|--------|------|--------|------|--------|------|--------|------|--------|------|--------|------|--------|------|--------|------|--------|------|--------|------|--------|------|--------|------|--------|------|--------|------|--------|------|--------|------|--------|------|--------|------|--------|------|--------|------|--------|------|--------|------|--------|------|--------|------|--------|------|--------|------|--------|------|--------|------|--------|------|--------|------|--------|------|--------|------|--------|------|--------|------|--------|------|--------|------|--------|------|--------|------|--------|------|--------|------|--------|------|--------|------|--------|------|--------|------|--------|------|--------|------|--------|------|--------|------|--------|------|--------|------|--------|------|--------|------|--------|------|--------|------|--------|------|--------|------|--------|------|--------|------|--------|------|--------|------|--------|------|--------|------|--------|------|--------|------|--------|------|--------|------|--------|------|--------|------|--------|------|--------|------|--------|------|--------|------|--------|------|--------|------|--------|------|--------|------|--------|------|--------|------|--------|------|--------|------|--------|------|--------|------|--------|------|--------|------|--------|------|--------|------|--------|------|--------|------|--------|------|--------|------|--------|------|--------|------|--------|------|--------|------|--------|------|--------|------|--------|------|--------|------|--------|------|--------|------|--------|------|--------|------|--------|------|--------|------|--------|------|--------|------|--------|------|--------|------|--------|------|--------|------|--------|------|--------|------|--------|------|--------|------|--------|------|--------|------|--------|
|                                | <i>Culex pipiens_gui</i>       | <a href="#">Cqup\Atp6v0a2b</a> | <a href="#">CP0083234</a> | 52     | 98     | 35     | 117  | 66     | 513  |        |      |        |      |        |      |        |      |        | 66            | 1587* (A base deletion at 1499) |      |        |      |        |      |        |      |        |      | 320    | 172  | 59     | 97   | 238    | intron2? | 477    |      |        |      |        |      |        |            |         |      |        |      |        |      |               |                    |        |      |        |      |        |      |        |      |        |      |        |      |        |      |        |      |        |      |        |      |        |      |        |      |        |      |        |      |        |      |        |      |        |      |        |      |        |      |        |      |        |      |        |      |        |      |        |      |        |      |        |      |        |      |        |      |        |      |        |      |        |      |        |      |        |      |        |      |        |      |        |      |        |      |        |      |        |      |        |      |        |      |        |      |        |      |        |      |        |      |        |      |        |      |        |      |        |      |        |      |        |      |        |      |        |      |        |      |        |      |        |      |        |      |        |      |        |      |        |      |        |      |        |      |        |      |        |      |        |      |        |      |        |      |        |      |        |      |        |      |        |      |        |      |        |      |        |      |        |      |        |      |        |      |        |      |        |      |        |      |        |      |        |      |        |      |        |      |        |      |        |      |        |      |        |      |        |      |        |      |        |      |        |      |        |      |        |      |        |      |        |      |        |      |        |      |        |      |        |      |        |      |        |      |        |      |        |      |        |      |        |      |        |      |        |      |        |      |        |      |        |      |        |      |        |      |        |      |        |      |        |      |        |      |        |      |        |      |        |      |        |      |        |      |        |      |        |      |        |      |        |      |        |      |        |      |        |      |        |      |        |      |        |      |        |      |        |      |        |      |        |      |        |      |        |      |        |      |        |      |        |      |        |      |        |      |        |      |        |      |        |      |        |      |        |      |        |      |        |      |        |      |        |      |        |      |        |      |        |      |        |      |        |      |        |      |        |      |        |      |        |      |        |
| Diptera (Cecidomyiidae)        | <i>Mayetiola_destructor</i>    | <a href="#">Mdes\Atp6v0a2</a>  |                           | ND     | ND     | ND     | 117  | 81     | 774  |        |      |        |      |        |      |        |      |        |               | 104                             | 73   | 93     | 276  | 71     | 260  | 82     | 510  |        |      |        |      |        |      |        |          |        | 89   | 235    | 66   | 172    | 84   | 103    |            |         |      |        |      |        |      |               |                    |        |      |        |      |        |      |        |      |        |      |        |      |        |      |        |      |        |      |        |      |        |      |        |      |        |      |        |      |        |      |        |      |        |      |        |      |        |      |        |      |        |      |        |      |        |      |        |      |        |      |        |      |        |      |        |      |        |      |        |      |        |      |        |      |        |      |        |      |        |      |        |      |        |      |        |      |        |      |        |      |        |      |        |      |        |      |        |      |        |      |        |      |        |      |        |      |        |      |        |      |        |      |        |      |        |      |        |      |        |      |        |      |        |      |        |      |        |      |        |      |        |      |        |      |        |      |        |      |        |      |        |      |        |      |        |      |        |      |        |      |        |      |        |      |        |      |        |      |        |      |        |      |        |      |        |      |        |      |        |      |        |      |        |      |        |      |        |      |        |      |        |      |        |      |        |      |        |      |        |      |        |      |        |      |        |      |        |      |        |      |        |      |        |      |        |      |        |      |        |      |        |      |        |      |        |      |        |      |        |      |        |      |        |      |        |      |        |      |        |      |        |      |        |      |        |      |        |      |        |      |        |      |        |      |        |      |        |      |        |      |        |      |        |      |        |      |        |      |        |      |        |      |        |      |        |      |        |      |        |      |        |      |        |      |        |      |        |      |        |      |        |      |        |      |        |      |        |      |        |      |        |      |        |      |        |      |        |      |        |      |        |      |        |      |        |      |        |      |        |      |        |      |        |      |        |      |        |      |        |      |        |      |        |      |        |      |        |      |        |      |        |      |        |
| Lepidoptera                    | <i>Bombyx_mori</i>             | <a href="#">Bmor\Atp6v0a2</a>  | <a href="#">77</a>        | 16009  | 27     | 117    | 4407 | 177    | 1000 | 161    | 1089 | 181    | 1151 |        |      |        |      |        |               |                                 |      |        | 177  | 1158   | 213  | 526    | 151  | ND     | 374  | 1362   | 110  | 568    | 128  | 1143   | 221      | 697    | 235  | 379    | 172  | 526    | 100  | 95     | intron1    | 13141   |      |        |      |        |      |               |                    |        |      |        |      |        |      |        |      |        |      |        |      |        |      |        |      |        |      |        |      |        |      |        |      |        |      |        |      |        |      |        |      |        |      |        |      |        |      |        |      |        |      |        |      |        |      |        |      |        |      |        |      |        |      |        |      |        |      |        |      |        |      |        |      |        |      |        |      |        |      |        |      |        |      |        |      |        |      |        |      |        |      |        |      |        |      |        |      |        |      |        |      |        |      |        |      |        |      |        |      |        |      |        |      |        |      |        |      |        |      |        |      |        |      |        |      |        |      |        |      |        |      |        |      |        |      |        |      |        |      |        |      |        |      |        |      |        |      |        |      |        |      |        |      |        |      |        |      |        |      |        |      |        |      |        |      |        |      |        |      |        |      |        |      |        |      |        |      |        |      |        |      |        |      |        |      |        |      |        |      |        |      |        |      |        |      |        |      |        |      |        |      |        |      |        |      |        |      |        |      |        |      |        |      |        |      |        |      |        |      |        |      |        |      |        |      |        |      |        |      |        |      |        |      |        |      |        |      |        |      |        |      |        |      |        |      |        |      |        |      |        |      |        |      |        |      |        |      |        |      |        |      |        |      |        |      |        |      |        |      |        |      |        |      |        |      |        |      |        |      |        |      |        |      |        |      |        |      |        |      |        |      |        |      |        |      |        |      |        |      |        |      |        |      |        |      |        |      |        |      |        |      |        |      |        |      |        |      |        |      |        |      |        |      |        |      |        |      |        |      |        |      |        |
|                                | <i>Manduca sexta</i>           | <a href="#">Msex\Atp6v0a2</a>  |                           |        |        | 117    | 4168 | 177    | 1269 | 161    | 563  | 181    | 346  |        |      |        |      |        |               |                                 |      |        | 177  | 256    | 213  | 369    | 151  | 166    | 374  | 198    | 110  | 272    | 128  |        | 227      | 279    | 226  | 654    | 172  | 386    | 100  |        | 5'         | >-600   |      |        |      |        |      |               |                    |        |      |        |      |        |      |        |      |        |      |        |      |        |      |        |      |        |      |        |      |        |      |        |      |        |      |        |      |        |      |        |      |        |      |        |      |        |      |        |      |        |      |        |      |        |      |        |      |        |      |        |      |        |      |        |      |        |      |        |      |        |      |        |      |        |      |        |      |        |      |        |      |        |      |        |      |        |      |        |      |        |      |        |      |        |      |        |      |        |      |        |      |        |      |        |      |        |      |        |      |        |      |        |      |        |      |        |      |        |      |        |      |        |      |        |      |        |      |        |      |        |      |        |      |        |      |        |      |        |      |        |      |        |      |        |      |        |      |        |      |        |      |        |      |        |      |        |      |        |      |        |      |        |      |        |      |        |      |        |      |        |      |        |      |        |      |        |      |        |      |        |      |        |      |        |      |        |      |        |      |        |      |        |      |        |      |        |      |        |      |        |      |        |      |        |      |        |      |        |      |        |      |        |      |        |      |        |      |        |      |        |      |        |      |        |      |        |      |        |      |        |      |        |      |        |      |        |      |        |      |        |      |        |      |        |      |        |      |        |      |        |      |        |      |        |      |        |      |        |      |        |      |        |      |        |      |        |      |        |      |        |      |        |      |        |      |        |      |        |      |        |      |        |      |        |      |        |      |        |      |        |      |        |      |        |      |        |      |        |      |        |      |        |      |        |      |        |      |        |      |        |      |        |      |        |      |        |      |        |      |        |      |        |      |        |      |        |      |        |      |        |      |        |
|                                | <i>Danaus_plexippus</i>        | <a href="#">Dple\Atp6v0a2</a>  |                           |        |        | 117    | 2912 | 177    | 794  | 161    | 452  | 181    | 319  |        |      |        |      |        |               |                                 |      |        | 177  | 86     | 213  | 86     | 151? | 156    | 374  | 71     | 110  | 117    | 128  | 382    | 224      | 161    | 220? | 443    | 172  | 335    | 94   |        |            |         |      |        |      |        |      |               |                    |        |      |        |      |        |      |        |      |        |      |        |      |        |      |        |      |        |      |        |      |        |      |        |      |        |      |        |      |        |      |        |      |        |      |        |      |        |      |        |      |        |      |        |      |        |      |        |      |        |      |        |      |        |      |        |      |        |      |        |      |        |      |        |      |        |      |        |      |        |      |        |      |        |      |        |      |        |      |        |      |        |      |        |      |        |      |        |      |        |      |        |      |        |      |        |      |        |      |        |      |        |      |        |      |        |      |        |      |        |      |        |      |        |      |        |      |        |      |        |      |        |      |        |      |        |      |        |      |        |      |        |      |        |      |        |      |        |      |        |      |        |      |        |      |        |      |        |      |        |      |        |      |        |      |        |      |        |      |        |      |        |      |        |      |        |      |        |      |        |      |        |      |        |      |        |      |        |      |        |      |        |      |        |      |        |      |        |      |        |      |        |      |        |      |        |      |        |      |        |      |        |      |        |      |        |      |        |      |        |      |        |      |        |      |        |      |        |      |        |      |        |      |        |      |        |      |        |      |        |      |        |      |        |      |        |      |        |      |        |      |        |      |        |      |        |      |        |      |        |      |        |      |        |      |        |      |        |      |        |      |        |      |        |      |        |      |        |      |        |      |        |      |        |      |        |      |        |      |        |      |        |      |        |      |        |      |        |      |        |      |        |      |        |      |        |      |        |      |        |      |        |      |        |      |        |      |        |      |        |      |        |      |        |      |        |      |        |      |        |      |        |      |        |
|                                | <i>Heliconius_melpomene</i>    | <a href="#">Hmel\Atp6v0a2a</a> |                           |        |        | 117    | 2468 | 177    | 792  | 161    | 424  | 181    | 309  |        |      |        |      |        |               |                                 |      |        | 177  | 226    | 213  | 303    | 151  | 352    | 374  | 234    | 110  | 218    | 128  | 302    | 224      | 561    | 232  | 465    | 172  | 456    | 97   |        | intron1    | >1359   |      |        |      |        |      |               |                    |        |      |        |      |        |      |        |      |        |      |        |      |        |      |        |      |        |      |        |      |        |      |        |      |        |      |        |      |        |      |        |      |        |      |        |      |        |      |        |      |        |      |        |      |        |      |        |      |        |      |        |      |        |      |        |      |        |      |        |      |        |      |        |      |        |      |        |      |        |      |        |      |        |      |        |      |        |      |        |      |        |      |        |      |        |      |        |      |        |      |        |      |        |      |        |      |        |      |        |      |        |      |        |      |        |      |        |      |        |      |        |      |        |      |        |      |        |      |        |      |        |      |        |      |        |      |        |      |        |      |        |      |        |      |        |      |        |      |        |      |        |      |        |      |        |      |        |      |        |      |        |      |        |      |        |      |        |      |        |      |        |      |        |      |        |      |        |      |        |      |        |      |        |      |        |      |        |      |        |      |        |      |        |      |        |      |        |      |        |      |        |      |        |      |        |      |        |      |        |      |        |      |        |      |        |      |        |      |        |      |        |      |        |      |        |      |        |      |        |      |        |      |        |      |        |      |        |      |        |      |        |      |        |      |        |      |        |      |        |      |        |      |        |      |        |      |        |      |        |      |        |      |        |      |        |      |        |      |        |      |        |      |        |      |        |      |        |      |        |      |        |      |        |      |        |      |        |      |        |      |        |      |        |      |        |      |        |      |        |      |        |      |        |      |        |      |        |      |        |      |        |      |        |      |        |      |        |      |        |      |        |      |        |      |        |      |        |      |        |      |        |      |        |
|                                | <i>Heliconius_melpomene</i>    | <a href="#">Hmel\Atp6v0a2b</a> |                           |        |        | 108    | 4717 | 168    | 364  | 324    |      |        |      |        |      |        |      |        |               |                                 |      | 177    | 1455 | 213    | 548  | 151    | 854  | 377    | 407  | 110    | 425  | 128    | 362  | 218    | 245      | 172?   | 294  | 172    | 188  | 127    |      |        |            |         |      |        |      |        |      |               |                    |        |      |        |      |        |      |        |      |        |      |        |      |        |      |        |      |        |      |        |      |        |      |        |      |        |      |        |      |        |      |        |      |        |      |        |      |        |      |        |      |        |      |        |      |        |      |        |      |        |      |        |      |        |      |        |      |        |      |        |      |        |      |        |      |        |      |        |      |        |      |        |      |        |      |        |      |        |      |        |      |        |      |        |      |        |      |        |      |        |      |        |      |        |      |        |      |        |      |        |      |        |      |        |      |        |      |        |      |        |      |        |      |        |      |        |      |        |      |        |      |        |      |        |      |        |      |        |      |        |      |        |      |        |      |        |      |        |      |        |      |        |      |        |      |        |      |        |      |        |      |        |      |        |      |        |      |        |      |        |      |        |      |        |      |        |      |        |      |        |      |        |      |        |      |        |      |        |      |        |      |        |      |        |      |        |      |        |      |        |      |        |      |        |      |        |      |        |      |        |      |        |      |        |      |        |      |        |      |        |      |        |      |        |      |        |      |        |      |        |      |        |      |        |      |        |      |        |      |        |      |        |      |        |      |        |      |        |      |        |      |        |      |        |      |        |      |        |      |        |      |        |      |        |      |        |      |        |      |        |      |        |      |        |      |        |      |        |      |        |      |        |      |        |      |        |      |        |      |        |      |        |      |        |      |        |      |        |      |        |      |        |      |        |      |        |      |        |      |        |      |        |      |        |      |        |      |        |      |        |      |        |      |        |      |        |      |        |      |        |      |        |      |        |
| Lepidoptera                    | <i>Plutella_rylostella</i>     | <a href="#">Psy\Atp6v0a2a</a>  |                           |        |        | 117    | 2397 | 177    | 4393 | 155    | 464  | 181    | 588  |        |      |        |      |        |               |                                 |      |        | 177  | ND     | 213  | 858    | 151  | 416    | 374  | 316    | 110  | 686    | 128  | ND     | 227      | 347    | 241  | 470    | 172  | 335    | 97   |        |            |         |      |        |      |        |      |               |                    |        |      |        |      |        |      |        |      |        |      |        |      |        |      |        |      |        |      |        |      |        |      |        |      |        |      |        |      |        |      |        |      |        |      |        |      |        |      |        |      |        |      |        |      |        |      |        |      |        |      |        |      |        |      |        |      |        |      |        |      |        |      |        |      |        |      |        |      |        |      |        |      |        |      |        |      |        |      |        |      |        |      |        |      |        |      |        |      |        |      |        |      |        |      |        |      |        |      |        |      |        |      |        |      |        |      |        |      |        |      |        |      |        |      |        |      |        |      |        |      |        |      |        |      |        |      |        |      |        |      |        |      |        |      |        |      |        |      |        |      |        |      |        |      |        |      |        |      |        |      |        |      |        |      |        |      |        |      |        |      |        |      |        |      |        |      |        |      |        |      |        |      |        |      |        |      |        |      |        |      |        |      |        |      |        |      |        |      |        |      |        |      |        |      |        |      |        |      |        |      |        |      |        |      |        |      |        |      |        |      |        |      |        |      |        |      |        |      |        |      |        |      |        |      |        |      |        |      |        |      |        |      |        |      |        |      |        |      |        |      |        |      |        |      |        |      |        |      |        |      |        |      |        |      |        |      |        |      |        |      |        |      |        |      |        |      |        |      |        |      |        |      |        |      |        |      |        |      |        |      |        |      |        |      |        |      |        |      |        |      |        |      |        |      |        |      |        |      |        |      |        |      |        |      |        |      |        |      |        |      |        |      |        |      |        |      |        |      |        |      |        |      |        |
|                                | <i>Plutella_rylostella</i>     | <a href="#">Psy\Atp6v0a2b</a>  |                           |        |        | ND     | ND   | 177    | 735  | 155    | 338  | 181    | 459  |        |      |        |      |        |               |                                 |      |        | 177  | 1914   | 213  | 900    | 151  | 602    | 374  | 273    | 110  | 413    | 128  | 470    | 227      | 1057   | 241  | 446    | 172  | 574    | 97   |        |            |         |      |        |      |        |      |               |                    |        |      |        |      |        |      |        |      |        |      |        |      |        |      |        |      |        |      |        |      |        |      |        |      |        |      |        |      |        |      |        |      |        |      |        |      |        |      |        |      |        |      |        |      |        |      |        |      |        |      |        |      |        |      |        |      |        |      |        |      |        |      |        |      |        |      |        |      |        |      |        |      |        |      |        |      |        |      |        |      |        |      |        |      |        |      |        |      |        |      |        |      |        |      |        |      |        |      |        |      |        |      |        |      |        |      |        |      |        |      |        |      |        |      |        |      |        |      |        |      |        |      |        |      |        |      |        |      |        |      |        |      |        |      |        |      |        |      |        |      |        |      |        |      |        |      |        |      |        |      |        |      |        |      |        |      |        |      |        |      |        |      |        |      |        |      |        |      |        |      |        |      |        |      |        |      |        |      |        |      |        |      |        |      |        |      |        |      |        |      |        |      |        |      |        |      |        |      |        |      |        |      |        |      |        |      |        |      |        |      |        |      |        |      |        |      |        |      |        |      |        |      |        |      |        |      |        |      |        |      |        |      |        |      |        |      |        |      |        |      |        |      |        |      |        |      |        |      |        |      |        |      |        |      |        |      |        |      |        |      |        |      |        |      |        |      |        |      |        |      |        |      |        |      |        |      |        |      |        |      |        |      |        |      |        |      |        |      |        |      |        |      |        |      |        |      |        |      |        |      |        |      |        |      |        |      |        |      |        |      |        |      |        |      |        |      |        |      |        |      |        |      |        |
| Strepsiptera                   | <i>Mengenilla_moldrzyki</i>    | <a href="#">Mmol\Atp6v0a2</a>  |                           |        |        | 117    | ND   | 522    |      |        |      |        |      |        |      |        |      | ND     | 177           | 2944                            | 213  | 57     | 151  | ND     | 371  | ND     | 110  | 53     | 128  | ND     | 224  | ND     | 214  | 66     | 172      | ND     | 85   |        |      |        |      |        |            |         |      |        |      |        |      |               |                    |        |      |        |      |        |      |        |      |        |      |        |      |        |      |        |      |        |      |        |      |        |      |        |      |        |      |        |      |        |      |        |      |        |      |        |      |        |      |        |      |        |      |        |      |        |      |        |      |        |      |        |      |        |      |        |      |        |      |        |      |        |      |        |      |        |      |        |      |        |      |        |      |        |      |        |      |        |      |        |      |        |      |        |      |        |      |        |      |        |      |        |      |        |      |        |      |        |      |        |      |        |      |        |      |        |      |        |      |        |      |        |      |        |      |        |      |        |      |        |      |        |      |        |      |        |      |        |      |        |      |        |      |        |      |        |      |        |      |        |      |        |      |        |      |        |      |        |      |        |      |        |      |        |      |        |      |        |      |        |      |        |      |        |      |        |      |        |      |        |      |        |      |        |      |        |      |        |      |        |      |        |      |        |      |        |      |        |      |        |      |        |      |        |      |        |      |        |      |        |      |        |      |        |      |        |      |        |      |        |      |        |      |        |      |        |      |        |      |        |      |        |      |        |      |        |      |        |      |        |      |        |      |        |      |        |      |        |      |        |      |        |      |        |      |        |      |        |      |        |      |        |      |        |      |        |      |        |      |        |      |        |      |        |      |        |      |        |      |        |      |        |      |        |      |        |      |        |      |        |      |        |      |        |      |        |      |        |      |        |      |        |      |        |      |        |      |        |      |        |      |        |      |        |      |        |      |        |      |        |      |        |      |        |      |        |      |        |      |        |      |        |      |        |
|                                | <i>Tribolium_castaneum</i>     | <a href="#">Tcas\Atp6v0a2</a>  | <a href="#">47</a>        | 1994   | 19     | 117    | 48   | 519    |      |        |      |        |      |        |      |        |      | 49     | 390 (177+213) |                                 | 78   | 151    | ND   | 484    |      |        |      |        |      |        |      |        |      | 42     | 131      | 49     | 441  |        |      |        |      |        |            |         |      |        | 56   | 172    | 48   | 100           | 67                 | 5'     | -39  |        |      |        |      |        |      |        |      |        |      |        |      |        |      |        |      |        |      |        |      |        |      |        |      |        |      |        |      |        |      |        |      |        |      |        |      |        |      |        |      |        |      |        |      |        |      |        |      |        |      |        |      |        |      |        |      |        |      |        |      |        |      |        |      |        |      |        |      |        |      |        |      |        |      |        |      |        |      |        |      |        |      |        |      |        |      |        |      |        |      |        |      |        |      |        |      |        |      |        |      |        |      |        |      |        |      |        |      |        |      |        |      |        |      |        |      |        |      |        |      |        |      |        |      |        |      |        |      |        |      |        |      |        |      |        |      |        |      |        |      |        |      |        |      |        |      |        |      |        |      |        |      |        |      |        |      |        |      |        |      |        |      |        |      |        |      |        |      |        |      |        |      |        |      |        |      |        |      |        |      |        |      |        |      |        |      |        |      |        |      |        |      |        |      |        |      |        |      |        |      |        |      |        |      |        |      |        |      |        |      |        |      |        |      |        |      |        |      |        |      |        |      |        |      |        |      |        |      |        |      |        |      |        |      |        |      |        |      |        |      |        |      |        |      |        |      |        |      |        |      |        |      |        |      |        |      |        |      |        |      |        |      |        |      |        |      |        |      |        |      |        |      |        |      |        |      |        |      |        |      |        |      |        |      |        |      |        |      |        |      |        |      |        |      |        |      |        |      |        |      |        |      |        |      |        |      |        |      |        |      |        |      |        |      |        |      |        |      |        |      |        |
|                                | <i>Dendroctonus_ponderosae</i> | <a href="#">Dpon\Atp6v0a2a</a> | <a href="#">58</a>        | 527    | 20     | 117    | ND   | 177    | 51   | 190    | 51   | 128    | 53   | 217    | 56   | 173    | 53   | 151    | 1457          | 166                             | 52   | 229    | ND   | 110    | 65   | 137    | 55   | 239    | 52   | 199    | 58   | 281    |      |        |          |        |      |        |      |        |      | 60     | 5' intron1 | -11 106 |      |        |      |        |      |               |                    |        |      |        |      |        |      |        |      |        |      |        |      |        |      |        |      |        |      |        |      |        |      |        |      |        |      |        |      |        |      |        |      |        |      |        |      |        |      |        |      |        |      |        |      |        |      |        |      |        |      |        |      |        |      |        |      |        |      |        |      |        |      |        |      |        |      |        |      |        |      |        |      |        |      |        |      |        |      |        |      |        |      |        |      |        |      |        |      |        |      |        |      |        |      |        |      |        |      |        |      |        |      |        |      |        |      |        |      |        |      |        |      |        |      |        |      |        |      |        |      |        |      |        |      |        |      |        |      |        |      |        |      |        |      |        |      |        |      |        |      |        |      |        |      |        |      |        |      |        |      |        |      |        |      |        |      |        |      |        |      |        |      |        |      |        |      |        |      |        |      |        |      |        |      |        |      |        |      |        |      |        |      |        |      |        |      |        |      |        |      |        |      |        |      |        |      |        |      |        |      |        |      |        |      |        |      |        |      |        |      |        |      |        |      |        |      |        |      |        |      |        |      |        |      |        |      |        |      |        |      |        |      |        |      |        |      |        |      |        |      |        |      |        |      |        |      |        |      |        |      |        |      |        |      |        |      |        |      |        |      |        |      |        |      |        |      |        |      |        |      |        |      |        |      |        |      |        |      |        |      |        |      |        |      |        |      |        |      |        |      |        |      |        |      |        |      |        |      |        |      |        |      |        |      |        |      |        |      |        |      |        |      |        |      |        |      |        |      |        |      |        |      |        |
| <i>Dendroctonus_ponderosae</i> | <a href="#">Dpon\Atp6v0a2b</a> |                                |                           |        | 117    | 65     | 177  | 997    | 165  | 190    | 216  | 203    | 174  | 53     | 151  | 54     | 208  | 88     | 190           | 60                              |      |        | 110  | 64     | 134  | 62     | 236  | 2236   | 238  | 58     | 272  |        |      |        |          |        |      |        |      |        | 155  |        |            |         |      |        |      |        |      |               |                    |        |      |        |      |        |      |        |      |        |      |        |      |        |      |        |      |        |      |        |      |        |      |        |      |        |      |        |      |        |      |        |      |        |      |        |      |        |      |        |      |        |      |        |      |        |      |        |      |        |      |        |      |        |      |        |      |        |      |        |      |        |      |        |      |        |      |        |      |        |      |        |      |        |      |        |      |        |      |        |      |        |      |        |      |        |      |        |      |        |      |        |      |        |      |        |      |        |      |        |      |        |      |        |      |        |      |        |      |        |      |        |      |        |      |        |      |        |      |        |      |        |      |        |      |        |      |        |      |        |      |        |      |        |      |        |      |        |      |        |      |        |      |        |      |        |      |        |      |        |      |        |      |        |      |        |      |        |      |        |      |        |      |        |      |        |      |        |      |        |      |        |      |        |      |        |      |        |      |        |      |        |      |        |      |        |      |        |      |        |      |        |      |        |      |        |      |        |      |        |      |        |      |        |      |        |      |        |      |        |      |        |      |        |      |        |      |        |      |        |      |        |      |        |      |        |      |        |      |        |      |        |      |        |      |        |      |        |      |        |      |        |      |        |      |        |      |        |      |        |      |        |      |        |      |        |      |        |      |        |      |        |      |        |      |        |      |        |      |        |      |        |      |        |      |        |      |        |      |        |      |        |      |        |      |        |      |        |      |        |      |        |      |        |      |        |      |        |      |        |      |        |      |        |      |        |      |        |      |        |      |        |      |        |      |        |      |        |      |        |      |        |      |        |
| Hymenoptera                    | <i>Apis_mellifera</i>          | <a href="#">Amel\Atp6v0a2</a>  | <a href="#">160</a>       | >24746 | 24     | 117    | 845  | 180    | 1032 | 129    | 110  | 83     | 654  | 127    | 1462 | 177    | 206  | 213    | 289           | 214                             | 245  | 424    |      |        |      |        |      |        |      |        |      | 343    | 128  | 89     | 233      | 277    | 389  |        |      |        |      |        |            |         |      |        | 568  | 97     | 1130 | intron1       | 16102              |        |      |        |      |        |      |        |      |        |      |        |      |        |      |        |      |        |      |        |      |        |      |        |      |        |      |        |      |        |      |        |      |        |      |        |      |        |      |        |      |        |      |        |      |        |      |        |      |        |      |        |      |        |      |        |      |        |      |        |      |        |      |        |      |        |      |        |      |        |      |        |      |        |      |        |      |        |      |        |      |        |      |        |      |        |      |        |      |        |      |        |      |        |      |        |      |        |      |        |      |        |      |        |      |        |      |        |      |        |      |        |      |        |      |        |      |        |      |        |      |        |      |        |      |        |      |        |      |        |      |        |      |        |      |        |      |        |      |        |      |        |      |        |      |        |      |        |      |        |      |        |      |        |      |        |      |        |      |        |      |        |      |        |      |        |      |        |      |        |      |        |      |        |      |        |      |        |      |        |      |        |      |        |      |        |      |        |      |        |      |        |      |        |      |        |      |        |      |        |      |        |      |        |      |        |      |        |      |        |      |        |      |        |      |        |      |        |      |        |      |        |      |        |      |        |      |        |      |        |      |        |      |        |      |        |      |        |      |        |      |        |      |        |      |        |      |        |      |        |      |        |      |        |      |        |      |        |      |        |      |        |      |        |      |        |      |        |      |        |      |        |      |        |      |        |      |        |      |        |      |        |      |        |      |        |      |        |      |        |      |        |      |        |      |        |      |        |      |        |      |        |      |        |      |        |      |        |      |        |      |        |      |        |      |        |      |        |      |        |      |        |      |        |
|                                | <i>Apis_florea</i>             | <a href="#">Afla\Atp6v0a2</a>  |                           |        |        | 117    | 906  | 180    | 380  | 129    | 110  | 83     | 610  | 127    | 1454 | 177    | 277  | 213    | 387           | 214                             | 297  | 424    |      |        |      |        |      |        |      |        |      | 301    | 128* | 86     | 233      | 314    | 389  |        |      |        |      |        |            |         |      |        | 594  | 97     |      | 5'            | >-1507             |        |      |        |      |        |      |        |      |        |      |        |      |        |      |        |      |        |      |        |      |        |      |        |      |        |      |        |      |        |      |        |      |        |      |        |      |        |      |        |      |        |      |        |      |        |      |        |      |        |      |        |      |        |      |        |      |        |      |        |      |        |      |        |      |        |      |        |      |        |      |        |      |        |      |        |      |        |      |        |      |        |      |        |      |        |      |        |      |        |      |        |      |        |      |        |      |        |      |        |      |        |      |        |      |        |      |        |      |        |      |        |      |        |      |        |      |        |      |        |      |        |      |        |      |        |      |        |      |        |      |        |      |        |      |        |      |        |      |        |      |        |      |        |      |        |      |        |      |        |      |        |      |        |      |        |      |        |      |        |      |        |      |        |      |        |      |        |      |        |      |        |      |        |      |        |      |        |      |        |      |        |      |        |      |        |      |        |      |        |      |        |      |        |      |        |      |        |      |        |      |        |      |        |      |        |      |        |      |        |      |        |      |        |      |        |      |        |      |        |      |        |      |        |      |        |      |        |      |        |      |        |      |        |      |        |      |        |      |        |      |        |      |        |      |        |      |        |      |        |      |        |      |        |      |        |      |        |      |        |      |        |      |        |      |        |      |        |      |        |      |        |      |        |      |        |      |        |      |        |      |        |      |        |      |        |      |        |      |        |      |        |      |        |      |        |      |        |      |        |      |        |      |        |      |        |      |        |      |        |      |        |      |        |      |        |      |        |      |        |      |        |      |        |
|                                | <i>Bombus_terrestris</i>       | <a href="#">Bter\Atp6v0a2</a>  | <a href="#">619</a>       | 10596  | 24     | 117    | 1319 | 180    | 1493 | 129    | 112  | 83     | 2814 | 127    | 2050 | 177    | 956  | 213    | 576           | 214                             | 1114 | 421    |      |        |      |        |      |        |      |        |      | 1978   | 128  | 103    | 230      | 785    | 389  |        |      |        |      |        |            |         |      |        | 523  | 97     | 1581 | intron1       | 9973               |        |      |        |      |        |      |        |      |        |      |        |      |        |      |        |      |        |      |        |      |        |      |        |      |        |      |        |      |        |      |        |      |        |      |        |      |        |      |        |      |        |      |        |      |        |      |        |      |        |      |        |      |        |      |        |      |        |      |        |      |        |      |        |      |        |      |        |      |        |      |        |      |        |      |        |      |        |      |        |      |        |      |        |      |        |      |        |      |        |      |        |      |        |      |        |      |        |      |        |      |        |      |        |      |        |      |        |      |        |      |        |      |        |      |        |      |        |      |        |      |        |      |        |      |        |      |        |      |        |      |        |      |        |      |        |      |        |      |        |      |        |      |        |      |        |      |        |      |        |      |        |      |        |      |        |      |        |      |        |      |        |      |        |      |        |      |        |      |        |      |        |      |        |      |        |      |        |      |        |      |        |      |        |      |        |      |        |      |        |      |        |      |        |      |        |      |        |      |        |      |        |      |        |      |        |      |        |      |        |      |        |      |        |      |        |      |        |      |        |      |        |      |        |      |        |      |        |      |        |      |        |      |        |      |        |      |        |      |        |      |        |      |        |      |        |      |        |      |        |      |        |      |        |      |        |      |        |      |        |      |        |      |        |      |        |      |        |      |        |      |        |      |        |      |        |      |        |      |        |      |        |      |        |      |        |      |        |      |        |      |        |      |        |      |        |      |        |      |        |      |        |      |        |      |        |      |        |      |        |      |        |      |        |      |        |      |        |      |        |      |        |      |        |
|                                | <i>Bombus_impatiens</i>        | <a href="#">Bimp\Atp6v0a2</a>  |                           |        |        | 117    | 1257 | 180    | 800  | 129    | 112  | 83     | 2530 | 127    | 1997 | 177    | 1756 | 213    | 554           | 214                             | 1081 | 421    |      |        |      |        |      |        |      |        |      | 1986   | 128  | 110    | 230      | 545    | 389  |        |      |        |      |        |            |         |      |        | 542  | 97     |      | 5' intron1    | >-1463 >331        |        |      |        |      |        |      |        |      |        |      |        |      |        |      |        |      |        |      |        |      |        |      |        |      |        |      |        |      |        |      |        |      |        |      |        |      |        |      |        |      |        |      |        |      |        |      |        |      |        |      |        |      |        |      |        |      |        |      |        |      |        |      |        |      |        |      |        |      |        |      |        |      |        |      |        |      |        |      |        |      |        |      |        |      |        |      |        |      |        |      |        |      |        |      |        |      |        |      |        |      |        |      |        |      |        |      |        |      |        |      |        |      |        |      |        |      |        |      |        |      |        |      |        |      |        |      |        |      |        |      |        |      |        |      |        |      |        |      |        |      |        |      |        |      |        |      |        |      |        |      |        |      |        |      |        |      |        |      |        |      |        |      |        |      |        |      |        |      |        |      |        |      |        |      |        |      |        |      |        |      |        |      |        |      |        |      |        |      |        |      |        |      |        |      |        |      |        |      |        |      |        |      |        |      |        |      |        |      |        |      |        |      |        |      |        |      |        |      |        |      |        |      |        |      |        |      |        |      |        |      |        |      |        |      |        |      |        |      |        |      |        |      |        |      |        |      |        |      |        |      |        |      |        |      |        |      |        |      |        |      |        |      |        |      |        |      |        |      |        |      |        |      |        |      |        |      |        |      |        |      |        |      |        |      |        |      |        |      |        |      |        |      |        |      |        |      |        |      |        |      |        |      |        |      |        |      |        |      |        |      |        |      |        |      |        |      |        |      |        |      |        |      |        |
|                                | <i>Megachile_rotundata</i>     | <a href="#">Mrot\Atp6v0a2</a>  |                           |        |        | 117    | 1756 | 180    | 1705 | 129    | 110  | 83     | 1331 | 127    | 2379 | 177    | 554  | 213    | 190           | 214                             | 643  | 421    |      |        |      |        |      |        |      |        |      | 300    | 128  | 58     | 233      | 277    | 389  |        |      |        |      |        |            |         |      |        | 94   | 100    |      |               |                    |        |      |        |      |        |      |        |      |        |      |        |      |        |      |        |      |        |      |        |      |        |      |        |      |        |      |        |      |        |      |        |      |        |      |        |      |        |      |        |      |        |      |        |      |        |      |        |      |        |      |        |      |        |      |        |      |        |      |        |      |        |      |        |      |        |      |        |      |        |      |        |      |        |      |        |      |        |      |        |      |        |      |        |      |        |      |        |      |        |      |        |      |        |      |        |      |        |      |        |      |        |      |        |      |        |      |        |      |        |      |        |      |        |      |        |      |        |      |        |      |        |      |        |      |        |      |        |      |        |      |        |      |        |      |        |      |        |      |        |      |        |      |        |      |        |      |        |      |        |      |        |      |        |      |        |      |        |      |        |      |        |      |        |      |        |      |        |      |        |      |        |      |        |      |        |      |        |      |        |      |        |      |        |      |        |      |        |      |        |      |        |      |        |      |        |      |        |      |        |      |        |      |        |      |        |      |        |      |        |      |        |      |        |      |        |      |        |      |        |      |        |      |        |      |        |      |        |      |        |      |        |      |        |      |        |      |        |      |        |      |        |      |        |      |        |      |        |      |        |      |        |      |        |      |        |      |        |      |        |      |        |      |        |      |        |      |        |      |        |      |        |      |        |      |        |      |        |      |        |      |        |      |        |      |        |      |        |      |        |      |        |      |        |      |        |      |        |      |        |      |        |      |        |      |        |      |        |      |        |      |        |      |        |      |        |      |        |      |        |      |        |      |        |
|                                | <i>Acromyrmex_echinator</i>    | <a href="#">Aech\Atp6v0a2</a>  |                           |        |        | 117    | 1138 | 180    | 487  | 129    | 119  | 83     | 712  | 127    | 233  | 177    | 240  | 213    | 478           | 214                             | 101  | 427    |      |        |      |        |      |        |      |        |      | 365    | 128  | 94     | 233      | 360    | 398  |        |      |        |      |        |            |         |      |        | 359  | 97     |      | 5' 5' intron1 | -5545 -4818 658    |        |      |        |      |        |      |        |      |        |      |        |      |        |      |        |      |        |      |        |      |        |      |        |      |        |      |        |      |        |      |        |      |        |      |        |      |        |      |        |      |        |      |        |      |        |      |        |      |        |      |        |      |        |      |        |      |        |      |        |      |        |      |        |      |        |      |        |      |        |      |        |      |        |      |        |      |        |      |        |      |        |      |        |      |        |      |        |      |        |      |        |      |        |      |        |      |        |      |        |      |        |      |        |      |        |      |        |      |        |      |        |      |        |      |        |      |        |      |        |      |        |      |        |      |        |      |        |      |        |      |        |      |        |      |        |      |        |      |        |      |        |      |        |      |        |      |        |      |        |      |        |      |        |      |        |      |        |      |        |      |        |      |        |      |        |      |        |      |        |      |        |      |        |      |        |      |        |      |        |      |        |      |        |      |        |      |        |      |        |      |        |      |        |      |        |      |        |      |        |      |        |      |        |      |        |      |        |      |        |      |        |      |        |      |        |      |        |      |        |      |        |      |        |      |        |      |        |      |        |      |        |      |        |      |        |      |        |      |        |      |        |      |        |      |        |      |        |      |        |      |        |      |        |      |        |      |        |      |        |      |        |      |        |      |        |      |        |      |        |      |        |      |        |      |        |      |        |      |        |      |        |      |        |      |        |      |        |      |        |      |        |      |        |      |        |      |        |      |        |      |        |      |        |      |        |      |        |      |        |      |        |      |        |      |        |      |        |      |        |      |        |      |        |
|                                | <i>Atta_cephalotes</i>         | <a href="#">Acep\Atp6v0a2</a>  |                           |        |        | 117    | 1147 | 180    | 494  | 129    | 119  | 83     | ND   | 127    | 235  | 177    | 254  | 213    | ND            | 214                             | 94   | 427    |      |        |      |        |      |        |      |        |      | 347    | 128  | 87     | 233      | 353    | 398  |        |      |        |      |        |            |         |      |        | 352  | 97     |      | 5' 5' intron1 | >-4813 >-1055 >537 |        |      |        |      |        |      |        |      |        |      |        |      |        |      |        |      |        |      |        |      |        |      |        |      |        |      |        |      |        |      |        |      |        |      |        |      |        |      |        |      |        |      |        |      |        |      |        |      |        |      |        |      |        |      |        |      |        |      |        |      |        |      |        |      |        |      |        |      |        |      |        |      |        |      |        |      |        |      |        |      |        |      |        |      |        |      |        |      |        |      |        |      |        |      |        |      |        |      |        |      |        |      |        |      |        |      |        |      |        |      |        |      |        |      |        |      |        |      |        |      |        |      |        |      |        |      |        |      |        |      |        |      |        |      |        |      |        |      |        |      |        |      |        |      |        |      |        |      |        |      |        |      |        |      |        |      |        |      |        |      |        |      |        |      |        |      |        |      |        |      |        |      |        |      |        |      |        |      |        |      |        |      |        |      |        |      |        |      |        |      |        |      |        |      |        |      |        |      |        |      |        |      |        |      |        |      |        |      |        |      |        |      |        |      |        |      |        |      |        |      |        |      |        |      |        |      |        |      |        |      |        |      |        |      |        |      |        |      |        |      |        |      |        |      |        |      |        |      |        |      |        |      |        |      |        |      |        |      |        |      |        |      |        |      |        |      |        |      |        |      |        |      |        |      |        |      |        |      |        |      |        |      |        |      |        |      |        |      |        |      |        |      |        |      |        |      |        |      |        |      |        |      |        |      |        |      |        |      |        |      |        |      |        |      |        |      |        |      |        |      |        |      |        |
|                                | <i>Solenopsis_invicta</i>      | <a href="#">Sinv\Atp6v0a2</a>  |                           |        |        | 117    | 733  | 180    | 689  | 129    | 113  | 83     | 1182 | 127    | 210  | 177    | 298  | 213    | 632           | 214                             | 108  | 424    |      |        |      |        |      |        |      |        |      | 315    | 128  | 605    | 230      | 875    | 392  |        |      |        |      |        |            |         |      |        | 720  | 97     |      |               |                    |        |      |        |      |        |      |        |      |        |      |        |      |        |      |        |      |        |      |        |      |        |      |        |      |        |      |        |      |        |      |        |      |        |      |        |      |        |      |        |      |        |      |        |      |        |      |        |      |        |      |        |      |        |      |        |      |        |      |        |      |        |      |        |      |        |      |        |      |        |      |        |      |        |      |        |      |        |      |        |      |        |      |        |      |        |      |        |      |        |      |        |      |        |      |        |      |        |      |        |      |        |      |        |      |        |      |        |      |        |      |        |      |        |      |        |      |        |      |        |      |        |      |        |      |        |      |        |      |        |      |        |      |        |      |        |      |        |      |        |      |        |      |        |      |        |      |        |      |        |      |        |      |        |      |        |      |        |      |        |      |        |      |        |      |        |      |        |      |        |      |        |      |        |      |        |      |        |      |        |      |        |      |        |      |        |      |        |      |        |      |        |      |        |      |        |      |        |      |        |      |        |      |        |      |        |      |        |      |        |      |        |      |        |      |        |      |        |      |        |      |        |      |        |      |        |      |        |      |        |      |        |      |        |      |        |      |        |      |        |      |        |      |        |      |        |      |        |      |        |      |        |      |        |      |        |      |        |      |        |      |        |      |        |      |        |      |        |      |        |      |        |      |        |      |        |      |        |      |        |      |        |      |        |      |        |      |        |      |        |      |        |      |        |      |        |      |        |      |        |      |        |      |        |      |        |      |        |      |        |      |        |      |        |      |        |      |        |      |        |      |        |      |        |
|                                | <i>Pogonomyrmex_barbatus</i>   | <a href="#">Pbar\Atp6v0a2</a>  |                           |        |        | 117    | 430  | 180    | 364  | 129    | 116  | 83     | 696  | 127    | 240  | 177    | 245  | 213    | 454           | 214                             | 90   | 427    |      |        |      |        |      |        |      |        |      | 352    | 128  | 74     | 233      | 151    | 398  |        |      |        |      |        |            |         |      |        | 383  | 97     |      |               |                    |        |      |        |      |        |      |        |      |        |      |        |      |        |      |        |      |        |      |        |      |        |      |        |      |        |      |        |      |        |      |        |      |        |      |        |      |        |      |        |      |        |      |        |      |        |      |        |      |        |      |        |      |        |      |        |      |        |      |        |      |        |      |        |      |        |      |        |      |        |      |        |      |        |      |        |      |        |      |        |      |        |      |        |      |        |      |        |      |        |      |        |      |        |      |        |      |        |      |        |      |        |      |        |      |        |      |        |      |        |      |        |      |        |      |        |      |        |      |        |      |        |      |        |      |        |      |        |      |        |      |        |      |        |      |        |      |        |      |        |      |        |      |        |      |        |      |        |      |        |      |        |      |        |      |        |      |        |      |        |      |        |      |        |      |        |      |        |      |        |      |        |      |        |      |        |      |        |      |        |      |        |      |        |      |        |      |        |      |        |      |        |      |        |      |        |      |        |      |        |      |        |      |        |      |        |      |        |      |        |      |        |      |        |      |        |      |        |      |        |      |        |      |        |      |        |      |        |      |        |      |        |      |        |      |        |      |        |      |        |      |        |      |        |      |        |      |        |      |        |      |        |      |        |      |        |      |        |      |        |      |        |      |        |      |        |      |        |      |        |      |        |      |        |      |        |      |        |      |        |      |        |      |        |      |        |      |        |      |        |      |        |      |        |      |        |      |        |      |        |      |        |      |        |      |        |      |        |      |        |      |        |      |        |      |        |      |        |      |        |      |        |      |        |
|                                | <i>Camponotus_floridanus</i>   | <a href="#">Cflo\Atp6v0a2</a>  |                           |        |        | 117    | 349  | 180    | 659  | 129    | 113  | 83     | ND   | ND     | ND   | 177    | 238  | 213    | 279           | 214                             | 96   | 430    |      |        |      |        |      |        |      |        |      | 363    | 128  | 76     | 233      | 462    | 395  |        |      |        |      |        |            |         |      |        | 380  | 97     |      |               |                    |        |      |        |      |        |      |        |      |        |      |        |      |        |      |        |      |        |      |        |      |        |      |        |      |        |      |        |      |        |      |        |      |        |      |        |      |        |      |        |      |        |      |        |      |        |      |        |      |        |      |        |      |        |      |        |      |        |      |        |      |        |      |        |      |        |      |        |      |        |      |        |      |        |      |        |      |        |      |        |      |        |      |        |      |        |      |        |      |        |      |        |      |        |      |        |      |        |      |        |      |        |      |        |      |        |      |        |      |        |      |        |      |        |      |        |      |        |      |        |      |        |      |        |      |        |      |        |      |        |      |        |      |        |      |        |      |        |      |        |      |        |      |        |      |        |      |        |      |        |      |        |      |        |      |        |      |        |      |        |      |        |      |        |      |        |      |        |      |        |      |        |      |        |      |        |      |        |      |        |      |        |      |        |      |        |      |        |      |        |      |        |      |        |      |        |      |        |      |        |      |        |      |        |      |        |      |        |      |        |      |        |      |        |      |        |      |        |      |        |      |        |      |        |      |        |      |        |      |        |      |        |      |        |      |        |      |        |      |        |      |        |      |        |      |        |      |        |      |        |      |        |      |        |      |        |      |        |      |        |      |        |      |        |      |        |      |        |      |        |      |        |      |        |      |        |      |        |      |        |      |        |      |        |      |        |      |        |      |        |      |        |      |        |      |        |      |        |      |        |      |        |      |        |      |        |      |        |      |        |      |        |      |        |      |        |      |        |      |        |      |        |      |        |
|                                | <i>Linepithema_humile</i>      | <a href="#">Lhum\Atp6v0a2</a>  |                           |        |        | 117    | 257  | 180    | 179  | 129    | 113  | 83     | 692  | 127    | 306  | 177    | 120  | 213    | 385           | 214                             | 89   | 430    |      |        |      |        |      |        |      |        |      | 260    | 128  | 70     | 233      | 127    | 401  |        |      |        |      |        |            |         |      |        | 267  | 97     |      | 5'            | >-1921             |        |      |        |      |        |      |        |      |        |      |        |      |        |      |        |      |        |      |        |      |        |      |        |      |        |      |        |      |        |      |        |      |        |      |        |      |        |      |        |      |        |      |        |      |        |      |        |      |        |      |        |      |        |      |        |      |        |      |        |      |        |      |        |      |        |      |        |      |        |      |        |      |        |      |        |      |        |      |        |      |        |      |        |      |        |      |        |      |        |      |        |      |        |      |        |      |        |      |        |      |        |      |        |      |        |      |        |      |        |      |        |      |        |      |        |      |        |      |        |      |        |      |        |      |        |      |        |      |        |      |        |      |        |      |        |      |        |      |        |      |        |      |        |      |        |      |        |      |        |      |        |      |        |      |        |      |        |      |        |      |        |      |        |      |        |      |        |      |        |      |        |      |        |      |        |      |        |      |        |      |        |      |        |      |        |      |        |      |        |      |        |      |        |      |        |      |        |      |        |      |        |      |        |      |        |      |        |      |        |      |        |      |        |      |        |      |        |      |        |      |        |      |        |      |        |      |        |      |        |      |        |      |        |      |        |      |        |      |        |      |        |      |        |      |        |      |        |      |        |      |        |      |        |      |        |      |        |      |        |      |        |      |        |      |        |      |        |      |        |      |        |      |        |      |        |      |        |      |        |      |        |      |        |      |        |      |        |      |        |      |        |      |        |      |        |      |        |      |        |      |        |      |        |      |        |      |        |      |        |      |        |      |        |      |        |      |        |      |        |      |        |      |        |
|                                | <i>Harpegnathos_saltator</i>   | <a href="#">Hsal\Atp6v0a2</a>  |                           |        |        | 117    | 423  | 180    | 204  | 129    | 113  | 86     | 443  | 127    | 264  | 177    | 228  | 213    | 96            | 214                             | 150  | 421    |      |        |      |        |      |        |      |        |      | 381    | 128  | 86     | 239      | 330    | 416  |        |      |        |      |        |            |         |      |        | 415  | 97     |      |               |                    |        |      |        |      |        |      |        |      |        |      |        |      |        |      |        |      |        |      |        |      |        |      |        |      |        |      |        |      |        |      |        |      |        |      |        |      |        |      |        |      |        |      |        |      |        |      |        |      |        |      |        |      |        |      |        |      |        |      |        |      |        |      |        |      |        |      |        |      |        |      |        |      |        |      |        |      |        |      |        |      |        |      |        |      |        |      |        |      |        |      |        |      |        |      |        |      |        |      |        |      |        |      |        |      |        |      |        |      |        |      |        |      |        |      |        |      |        |      |        |      |        |      |        |      |        |      |        |      |        |      |        |      |        |      |        |      |        |      |        |      |        |      |        |      |        |      |        |      |        |      |        |      |        |      |        |      |        |      |        |      |        |      |        |      |        |      |        |      |        |      |        |      |        |      |        |      |        |      |        |      |        |      |        |      |        |      |        |      |        |      |        |      |        |      |        |      |        |      |        |      |        |      |        |      |        |      |        |      |        |      |        |      |        |      |        |      |        |      |        |      |        |      |        |      |        |      |        |      |        |      |        |      |        |      |        |      |        |      |        |      |        |      |        |      |        |      |        |      |        |      |        |      |        |      |        |      |        |      |        |      |        |      |        |      |        |      |        |      |        |      |        |      |        |      |        |      |        |      |        |      |        |      |        |      |        |      |        |      |        |      |        |      |        |      |        |      |        |      |        |      |        |      |        |      |        |      |        |      |        |      |        |      |        |      |        |      |        |      |        |      |        |      |        |
|                                | <i>Nasonia_vitripennis</i>     | <a href="#">Nvit\Atp6v0a2a</a> | <a href="#">352</a>       | 13600  | 60     | 117    | 76   | 309    |      |        |      |        |      |        |      |        |      |        |               | ?                               | 86   | 116    | 127  | 73     | 177  | 74     | 213  | 87     | 214  | 111    | 433  |        |      |        |          |        |      |        |      |        |      |        | 92         | 128     | 83   | 227    | 88   | 395    | 97   | 106           | 902                |        |      |        |      |        |      |        |      |        |      |        |      |        |      |        |      |        |      |        |      |        |      |        |      |        |      |        |      |        |      |        |      |        |      |        |      |        |      |        |      |        |      |        |      |        |      |        |      |        |      |        |      |        |      |        |      |        |      |        |      |        |      |        |      |        |      |        |      |        |      |        |      |        |      |        |      |        |      |        |      |        |      |        |      |        |      |        |      |        |      |        |      |        |      |        |      |        |      |        |      |        |      |        |      |        |      |        |      |        |      |        |      |        |      |        |      |        |      |        |      |        |      |        |      |        |      |        |      |        |      |        |      |        |      |        |      |        |      |        |      |        |      |        |      |        |      |        |      |        |      |        |      |        |      |        |      |        |      |        |      |        |      |        |      |        |      |        |      |        |      |        |      |        |      |        |      |        |      |        |      |        |      |        |      |        |      |        |      |        |      |        |      |        |      |        |      |        |      |        |      |        |      |        |      |        |      |        |      |        |      |        |      |        |      |        |      |        |      |        |      |        |      |        |      |        |      |        |      |        |      |        |      |        |      |        |      |        |      |        |      |        |      |        |      |        |      |        |      |        |      |        |      |        |      |        |      |        |      |        |      |        |      |        |      |        |      |        |      |        |      |        |      |        |      |        |      |        |      |        |      |        |      |        |      |        |      |        |      |        |      |        |      |        |      |        |      |        |      |        |      |        |      |        |      |        |      |        |      |        |      |        |      |        |      |        |      |        |      |        |      |        |      |        |
|                                | <i>Nasonia_vitripennis</i>     | <a href="#">Nvit\Atp6v0a2b</a> | <a href="#">96</a>        | 747    | 21     | 117    | 72   | 309    |      |        |      |        |      |        |      |        |      |        |               | 131                             | 74   | 68     | 127  | 60     | 177  | 85     | 213  | 72     | 214  | 73     | 433  |        |      |        |          |        |      |        |      |        |      |        | 70         | 128     | 68   | 224    | 78   | 401    | 76   | 103           | 89                 | 5'     | -6   |        |      |        |      |        |      |        |      |        |      |        |      |        |      |        |      |        |      |        |      |        |      |        |      |        |      |        |      |        |      |        |      |        |      |        |      |        |      |        |      |        |      |        |      |        |      |        |      |        |      |        |      |        |      |        |      |        |      |        |      |        |      |        |      |        |      |        |      |        |      |        |      |        |      |        |      |        |      |        |      |        |      |        |      |        |      |        |      |        |      |        |      |        |      |        |      |        |      |        |      |        |      |        |      |        |      |        |      |        |      |        |      |        |      |        |      |        |      |        |      |        |      |        |      |        |      |        |      |        |      |        |      |        |      |        |      |        |      |        |      |        |      |        |      |        |      |        |      |        |      |        |      |        |      |        |      |        |      |        |      |        |      |        |      |        |      |        |      |        |      |        |      |        |      |        |      |        |      |        |      |        |      |        |      |        |      |        |      |        |      |        |      |        |      |        |      |        |      |        |      |        |      |        |      |        |      |        |      |        |      |        |      |        |      |        |      |        |      |        |      |        |      |        |      |        |      |        |      |        |      |        |      |        |      |        |      |        |      |        |      |        |      |        |      |        |      |        |      |        |      |        |      |        |      |        |      |        |      |        |      |        |      |        |      |        |      |        |      |        |      |        |      |        |      |        |      |        |      |        |      |        |      |        |      |        |      |        |      |        |      |        |      |        |      |        |      |        |      |        |      |        |      |        |      |        |      |        |      |        |      |        |      |        |      |        |      |        |      |        |      |        |
|                                | <i>Nasonia_giraulti</i>        | <a href="#">Ngir\Atp6v0a2a</a> |                           |        |        | 117    | 74   | 309    |      |        |      |        |      |        |      |        |      |        |               | 110                             | 86   | 116    | 127  | 73     | 177  | 74     | 213  | 87     | 214  | 111    | 433  |        |      |        |          |        |      |        |      |        |      |        | 92         | 128     | 81   | 227    | 96   | 395    | 96   | 106           |                    |        |      |        |      |        |      |        |      |        |      |        |      |        |      |        |      |        |      |        |      |        |      |        |      |        |      |        |      |        |      |        |      |        |      |        |      |        |      |        |      |        |      |        |      |        |      |        |      |        |      |        |      |        |      |        |      |        |      |        |      |        |      |        |      |        |      |        |      |        |      |        |      |        |      |        |      |        |      |        |      |        |      |        |      |        |      |        |      |        |      |        |      |        |      |        |      |        |      |        |      |        |      |        |      |        |      |        |      |        |      |        |      |        |      |        |      |        |      |        |      |        |      |        |      |        |      |        |      |        |      |        |      |        |      |        |      |        |      |        |      |        |      |        |      |        |      |        |      |        |      |        |      |        |      |        |      |        |      |        |      |        |      |        |      |        |      |        |      |        |      |        |      |        |      |        |      |        |      |        |      |        |      |        |      |        |      |        |      |        |      |        |      |        |      |        |      |        |      |        |      |        |      |        |      |        |      |        |      |        |      |        |      |        |      |        |      |        |      |        |      |        |      |        |      |        |      |        |      |        |      |        |      |        |      |        |      |        |      |        |      |        |      |        |      |        |      |        |      |        |      |        |      |        |      |        |      |        |      |        |      |        |      |        |      |        |      |        |      |        |      |        |      |        |      |        |      |        |      |        |      |        |      |        |      |        |      |        |      |        |      |        |      |        |      |        |      |        |      |        |      |        |      |        |      |        |      |        |      |        |      |        |      |        |      |        |      |        |      |        |      |        |      |        |
|                                | <i>Nasonia_giraulti</i>        | <a href="#">Ngir\Atp6v0a2b</a> |                           |        |        | 117    | 72   | 309    |      |        |      |        |      |        |      |        |      |        |               | 134                             | 74   | 71     | 127  | 60     | 177  | 85     | 213  | 72     | 214  | 62     | 433  |        |      | 70     | 128      | 67     | 224  | 73     | 401  | 76     | 103  |        | 5'         | >-870   |      |        |      |        |      |               |                    |        |      |        |      |        |      |        |      |        |      |        |      |        |      |        |      |        |      |        |      |        |      |        |      |        |      |        |      |        |      |        |      |        |      |        |      |        |      |        |      |        |      |        |      |        |      |        |      |        |      |        |      |        |      |        |      |        |      |        |      |        |      |        |      |        |      |        |      |        |      |        |      |        |      |        |      |        |      |        |      |        |      |        |      |        |      |        |      |        |      |        |      |        |      |        |      |        |      |        |      |        |      |        |      |        |      |        |      |        |      |        |      |        |      |        |      |        |      |        |      |        |      |        |      |        |      |        |      |        |      |        |      |        |      |        |      |        |      |        |      |        |      |        |      |        |      |        |      |        |      |        |      |        |      |        |      |        |      |        |      |        |      |        |      |        |      |        |      |        |      |        |      |        |      |        |      |        |      |        |      |        |      |        |      |        |      |        |      |        |      |        |      |        |      |        |      |        |      |        |      |        |      |        |      |        |      |        |      |        |      |        |      |        |      |        |      |        |      |        |      |        |      |        |      |        |      |        |      |        |      |        |      |        |      |        |      |        |      |        |      |        |      |        |      |        |      |        |      |        |      |        |      |        |      |        |      |        |      |        |      |        |      |        |      |        |      |        |      |        |      |        |      |        |      |        |      |        |      |        |      |        |      |        |      |        |      |        |      |        |      |        |      |        |      |        |      |        |      |        |      |        |      |        |      |        |      |        |      |        |      |        |      |        |      |        |      |        |      |        |      |        |      |        |
| <i>Nasonia_longicornis</i>     | <a href="#">Nlon\Atp6v0a2a</a> |                                |                           |        | 117    | 74     | 309  |        |      |        |      |        |      |        |      |        |      |        | 110           | 86                              | 116  | 127    | 73   | 177    | 74   | 213    | 87   | 214    | 145  | 433    |      |        | 93   | 128    | 81       | 227    | 90   | 395    | 97   | 106    |      |        |            |         |      |        |      |        |      |               |                    |        |      |        |      |        |      |        |      |        |      |        |      |        |      |        |      |        |      |        |      |        |      |        |      |        |      |        |      |        |      |        |      |        |      |        |      |        |      |        |      |        |      |        |      |        |      |        |      |        |      |        |      |        |      |        |      |        |      |        |      |        |      |        |      |        |      |        |      |        |      |        |      |        |      |        |      |        |      |        |      |        |      |        |      |        |      |        |      |        |      |        |      |        |      |        |      |        |      |        |      |        |      |        |      |        |      |        |      |        |      |        |      |        |      |        |      |        |      |        |      |        |      |        |      |        |      |        |      |        |      |        |      |        |      |        |      |        |      |        |      |        |      |        |      |        |      |        |      |        |      |        |      |        |      |        |      |        |      |        |      |        |      |        |      |        |      |        |      |        |      |        |      |        |      |        |      |        |      |        |      |        |      |        |      |        |      |        |      |        |      |        |      |        |      |        |      |        |      |        |      |        |      |        |      |        |      |        |      |        |      |        |      |        |      |        |      |        |      |        |      |        |      |        |      |        |      |        |      |        |      |        |      |        |      |        |      |        |      |        |      |        |      |        |      |        |      |        |      |        |      |        |      |        |      |        |      |        |      |        |      |        |      |        |      |        |      |        |      |        |      |        |      |        |      |        |      |        |      |        |      |        |      |        |      |        |      |        |      |        |      |        |      |        |      |        |      |        |      |        |      |        |      |        |      |        |      |        |      |        |      |        |      |        |      |        |      |        |      |        |      |        |      |        |
| <i>Nasonia_longicornis</i>     | <a href="#">Nlon\Atp6v0a2b</a> |                                |                           |        | 117    | 72     | 309  |        |      |        |      |        |      |        |      |        |      |        | 131           | 74                              | 71   | 127    | 60   | 177    | 85   | 213    | 72   | 214    | 62   | 433    |      |        | 70   | 128    | 67       | 224    | 73   | 401    | 76   | 103    |      | 5'     | >-868      |         |      |        |      |        |      |               |                    |        |      |        |      |        |      |        |      |        |      |        |      |        |      |        |      |        |      |        |      |        |      |        |      |        |      |        |      |        |      |        |      |        |      |        |      |        |      |        |      |        |      |        |      |        |      |        |      |        |      |        |      |        |      |        |      |        |      |        |      |        |      |        |      |        |      |        |      |        |      |        |      |        |      |        |      |        |      |        |      |        |      |        |      |        |      |        |      |        |      |        |      |        |      |        |      |        |      |        |      |        |      |        |      |        |      |        |      |        |      |        |      |        |      |        |      |        |      |        |      |        |      |        |      |        |      |        |      |        |      |        |      |        |      |        |      |        |      |        |      |        |      |        |      |        |      |        |      |        |      |        |      |        |      |        |      |        |      |        |      |        |      |        |      |        |      |        |      |        |      |        |      |        |      |        |      |        |      |        |      |        |      |        |      |        |      |        |      |        |      |        |      |        |      |        |      |        |      |        |      |        |      |        |      |        |      |        |      |        |      |        |      |        |      |        |      |        |      |        |      |        |      |        |      |        |      |        |      |        |      |        |      |        |      |        |      |        |      |        |      |        |      |        |      |        |      |        |      |        |      |        |      |        |      |        |      |        |      |        |      |        |      |        |      |        |      |        |      |        |      |        |      |        |      |        |      |        |      |        |      |        |      |        |      |        |      |        |      |        |      |        |      |        |      |        |      |        |      |        |      |        |      |        |      |        |      |        |      |        |      |        |      |        |      |        |      |        |      |        |      |        |      |        |
| Order                          | Species                        | Atp6v0a orthologs              | 5' exon                   | intron | 5'exon | intron | exon          | intron                          | exon | intron | exon | intron | exon | intron | exon | intron | exon | intron | exon | intron | exon | intron | exon     | intron | exon | intron | exon | intron | exon | intron | exon       | intron  | exon | intron | exon | intron | exon | intron        | exon               | intron | exon | intron | exon | intron | exon | intron | exon | intron | exon | intron | exon | intron | exon | intron | exon | intron | exon | intron | exon | intron | exon | intron | exon | intron | exon | intron | exon | intron | exon | intron | exon | intron | exon | intron | exon | intron | exon | intron | exon | intron | exon | intron | exon | intron | exon | intron | exon | intron | exon | intron | exon | intron | exon | intron | exon | intron | exon | intron | exon | intron | exon | intron | exon | intron | exon | intron | exon | intron | exon | intron | exon | intron | exon | intron | exon | intron | exon | intron | exon | intron | exon | intron | exon | intron | exon | intron | exon | intron | exon | intron | exon | intron | exon | intron | exon | intron | exon | intron | exon | intron | exon | intron | exon | intron | exon | intron | exon | intron | exon | intron | exon | intron | exon | intron | exon | intron | exon | intron | exon | intron | exon | intron | exon | intron | exon | intron | exon | intron | exon | intron | exon | intron | exon | intron | exon | intron | exon | intron | exon | intron | exon | intron | exon | intron | exon | intron | exon | intron | exon | intron | exon | intron | exon | intron | exon | intron | exon | intron | exon | intron | exon | intron | exon | intron | exon | intron | exon | intron | exon | intron | exon | intron | exon | intron | exon | intron | exon | intron | exon | intron | exon | intron | exon | intron | exon | intron | exon | intron | exon | intron | exon | intron | exon | intron | exon | intron | exon | intron | exon | intron | exon | intron | exon | intron | exon | intron | exon | intron | exon | intron | exon | intron | exon | intron | exon | intron | exon | intron | exon | intron | exon | intron | exon | intron | exon | intron | exon | intron | exon | intron | exon | intron | exon | intron | exon | intron | exon | intron | exon | intron | exon | intron | exon | intron | exon | intron | exon | intron | exon | intron | exon | intron | exon | intron | exon | intron | exon | intron | exon | intron | exon | intron | exon | intron | exon | intron | exon | intron | exon | intron | exon | intron | exon | intron | exon | intron | exon | intron | exon | intron | exon | intron | exon | intron | exon | intron | exon | intron | exon | intron | exon | intron | exon | intron | exon | intron | exon | intron | exon | intron | exon | intron | exon | intron | exon | intron | exon | intron | exon | intron | exon | intron | exon | intron | exon | intron | exon | intron | exon | intron | exon | intron |

[illegible]
