# Supplementary material for: Structural and Comparative Analyses of Insects Suggest the Presence of an Ultra-Conserved Regulatory Element of the Genes Encoding Vacuolar-Type ATPase Subunits and Assembly Factors
Source: MDPI journal article supplement (doi:10.3390/biology12081127), 2023-08-13
Supplement: s1 [file s1]

| Gene Cluster ID              | Atp6v0a                                                                                                                                      |
|------------------------------|----------------------------------------------------------------------------------------------------------------------------------------------|
| Drosophila melanogaster gene | Vha100-2 (CG18617)                                                                                                                           |
| FlyBase ID                   | <a href="#">FBgn0028670</a>                                                                                                                  |
| Predicted function           | ATPase, H+ transporting, lysosomal V0 subunit a                                                                                              |
| Protein size                 | 834 amino acids                                                                                                                              |
| Cytogenetic map              | 91A5-91A5                                                                                                                                    |
| Gene sequence location       | <a href="#">3R:14216039..14224876</a> [-]                                                                                                    |
| Dmel CLEAR sequence          | TCATGTGA                                                                                                                                     |
| CLEAR sequence location      | 3R:14224185..14224192                                                                                                                        |
| Drosophila Atp6v0a paralogs  | <a href="#">Vha100-1</a> (CG1709); <a href="#">Vha100-3</a> (CG30329); <a href="#">Vha100-4</a> (CG7678); <a href="#">Vha100-5</a> (CG12602) |

**FlyBase Vha100-2 (CG18617) gene model & CLEAR element (red) position:**

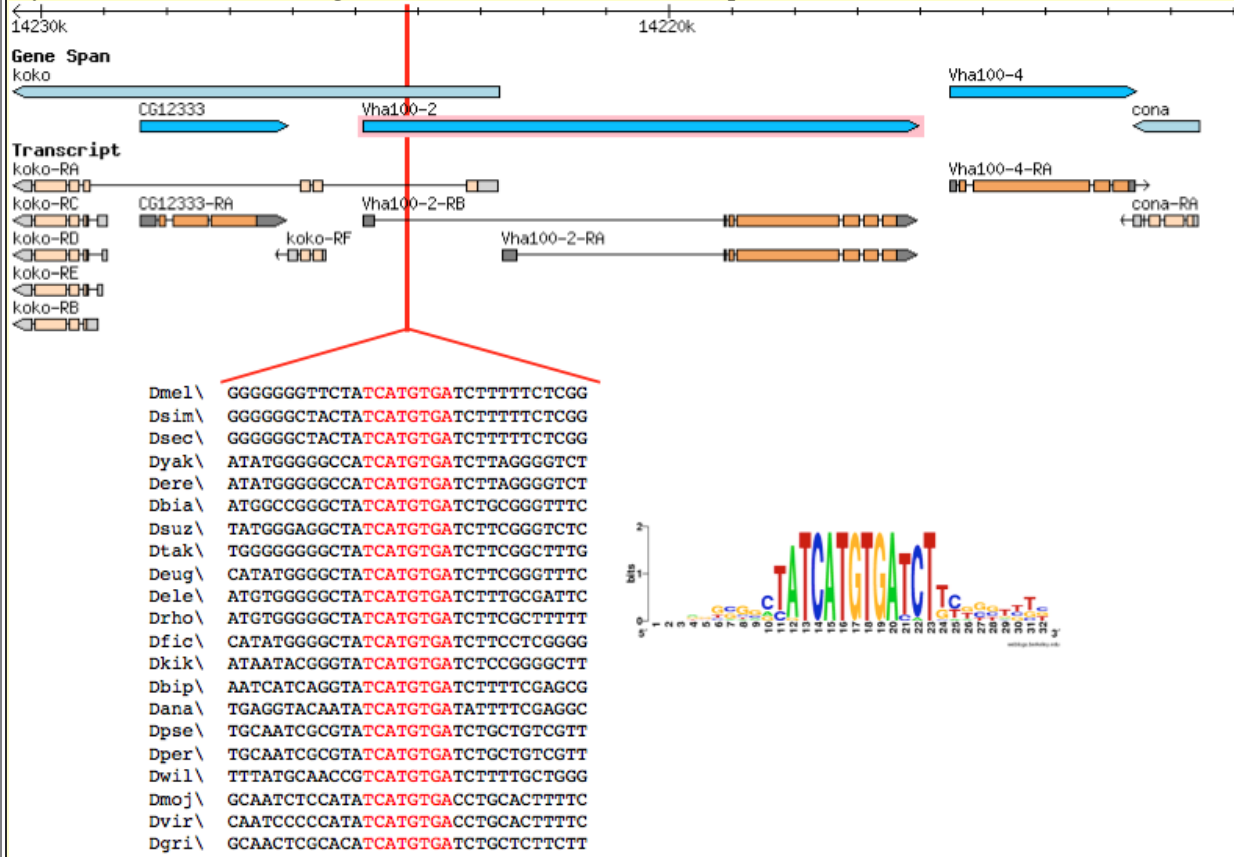

**Vha100-2 (CG18617) gene structure comparison in Drosophila species:**

Key: UTR region, CDS region

| Species                         | Vha100-2<br>Atp6v0a<br>orthologs | 5'exon | intron | exon | intron | exon | intron          | exon | intron        | exon | intron | exon3' | Extended CLEAR region |     | Position                         | bps<br>from<br>TSS |     |
|---------------------------------|----------------------------------|--------|--------|------|--------|------|-----------------|------|---------------|------|--------|--------|-----------------------|-----|----------------------------------|--------------------|-----|
| <i>Drosophila_melanogaster</i>  | <a href="#">Dmel\Vha100-2</a>    | 163    | 5582   | 21   | 117    | 66   | 1628            | 60   | 259           | 62   | 235    | 71     | 266                   | 308 | gggggggttctaTCATGTGAtcttttctcgg  | intron1            | 685 |
| <i>Drosophila_simulans</i>      | <a href="#">Dsim\GD20170</a>     |        |        |      | 117    | 66   | 1628            | 59   | 259           | 62   | 235    | 60     | 266                   |     | ggggggctactaTCATGTGAtcttttctcgg  | intron1?           |     |
| <i>Drosophila_sechellia</i>     | <a href="#">Dsec\GM18705</a>     | 162    | 3187   | 21   | 117    | 66   | 1628            | 60   | 259           | 62   | 235    | 60     | 266                   |     | ggggggctactaTCATGTGAtcttttctcgg  | intron1?           |     |
| <i>Drosophila_yakuba</i>        | <a href="#">Dyak\GE25199</a>     |        |        |      | 117    | 66   | 1628            | 60   | 259           | 62   | 235    | 57     | 266                   |     | atatggggcgcaTCATGTGAtcttaggggct  | intron1?           |     |
| <i>Drosophila_erecta</i>        | <a href="#">Dere\Vha100-2</a>    | 114    | ND     | 21   | 117    | 66   | 1628            | 56   | 259           | 62   | 235    | 58     | 266                   |     | atatggggcgcaTCATGTGAtcttaggggct  | intron1?           |     |
| <i>Drosophila_biarmipes</i>     | <a href="#">Dbia\Vha100-2</a>    |        |        |      | 117    | 67   | 1628            | 61   | 259           | 62   | 235    | 59     | 266                   |     | atggccgggctaTCATGTGAtctcggggttc  | intron1?           |     |
| <i>Drosophila_suzukii</i>       | <a href="#">Dsuz\Vha100-2</a>    |        |        |      | 117    | 67   | 1628            | 61   | 259           | 69   | 235    | 59     | 266                   |     | tatggaggctaTCATGTGAtcttcgggtctc  | intron1?           |     |
| <i>Drosophila_takahashii</i>    | <a href="#">Dtak\Vha100-2</a>    |        |        |      | 117    | 65   | 1631            | 325  | 259           | 472  | 235    | 58     | 266                   |     | tgggggggctaTCATGTGAtcttcggcttg   | intron1?           |     |
| <i>Drosophila_eugracilis</i>    | <a href="#">Deug\Vha100-2</a>    |        |        |      | 117    | 68   | 1628            | 60   | 494 (259+235) |      |        | 56     | 266                   |     | catatggggctaTCATGTGAtcttcgggttc  | intron1?           |     |
| <i>Drosophila_elegans</i>       | <a href="#">Dele\Vha100-2</a>    |        |        |      | 117    | 60   | 1625            | 65   | 259           | 71   | 235    | 58     | 266                   |     | atgtgggggctaTCATGTGAtctttgcgattc | intron1?           |     |
| <i>Drosophila_rhopaloea</i>     | <a href="#">Drho\Vha100-2</a>    |        |        |      | 117    | 60   | 1625            | 66   | 259           | 71   | 235    | 58     | 266                   |     | atgtgggggctaTCATGTGAtcttcgctttt  | intron1?           |     |
| <i>Drosophila_ficusphila</i>    | <a href="#">Dfic\Vha100-2</a>    |        |        |      | 117    | 60   | 1628            | 60   | 259           | 58   | 235    | 57     | 266                   |     | catatggggctaTCATGTGAtcttctcgggg  | intron1?           |     |
| <i>Drosophila_kikkawai</i>      | <a href="#">Dkik\Vha100-2</a>    |        |        |      | 117    | 59   | 1628            | 58   | 259           | 74   | 235    | 58     | 266                   |     | ataatcgggtaTCATGTGAtccggggctt    | intron1?           |     |
| <i>Drosophila_bipectinata</i>   | <a href="#">Dbip\Vha100-2</a>    |        |        |      | 117    | 62   | 1628            | 69   | 259           | 57   | 238    | 61     | 266                   |     | aatcatcaggaTCATGTGAtcttttcgagcg  | intron1?           |     |
| <i>Drosophila_ananassae</i>     | <a href="#">Dana\GF18112</a>     |        |        |      | 117    | 60   | 1887 (1628+259) |      |               | 61   | 238    | 61     | 266                   |     | tgaggtaacaTCATGTGAattttcagagc    | intron1?           |     |
| <i>Drosophila_pseudoobscura</i> | <a href="#">Dpse\GA15015</a>     | 92     | 3069   | 21   | 117    | 67   | 1628            | 70   | 259           | 67   | 235    | 65     | 266                   |     | tgcaatcgctaTCATGTGAtcgtctgctt    | intron1?           |     |
| <i>Drosophila_persimilis</i>    | <a href="#">Dper\GL23189</a>     |        |        | 21   | 117    | 67   | 1628            | 70   | 259           | 67   | 235    | 65     | 266                   |     | tgcaatcgctaTCATGTGAtcgtctgctt    | intron1?           |     |
| <i>Drosophila_miranda</i>       | <a href="#">Dmir\Vha100-2</a>    |        |        |      |        |      |                 |      |               |      |        |        |                       |     |                                  |                    |     |
| <i>Drosophila_willistoni</i>    | <a href="#">Dwil\GK11490</a>     |        |        |      | 117    | 68   | 1634            | 73   | 259           | 64   | 226    | 61     | 266                   |     | tttatgcaaccgTCATGTGAtcttttctggg  | intron1?           |     |
| <i>Drosophila_albomicans</i>    | <a href="#">Dalb\Vha100-2</a>    |        |        |      |        |      |                 |      |               |      |        |        |                       |     |                                  |                    |     |
| <i>Drosophila_mojavensis</i>    | <a href="#">Dmoj\GI24258</a>     | 122    | 5377   | 21   | 117    | 60   | 1631            | 58   | 262           | 67   | 232    | 62     | 266                   |     | gcaatctccataTCATGTGAacctgcactttc | intron1?           |     |
| <i>Drosophila_virilis</i>       | <a href="#">Dvir\GJ10832</a>     | 161    | 5187   | 21   | 117    | 69   | 1631            | 64   | 262           | 65   | 235    | 60     | 266                   |     | caatccccataTCATGTGAacctgcactttc  | intron1?           |     |
| <i>Drosophila_grimshawi</i>     | <a href="#">Dgri\GH19224</a>     | 65     |        | 27   | 117    | 85   | 1631            | 70   | 262           | 74   | 235    | 67     | 269                   |     | gcaactcgacaTCATGTGAtcgtctctt     | intron1?           |     |

Vha100-1 (CG1709) gene structure comparison in Drosophila species:

Key: UTR region, CDS region, alternatively spliced exons

| Species                        | Vha100-1<br>Atp6v0a<br>orthologs | 5'exon | intron | exon |     | intron | exon | intron | exon | intron       | exon        | intron | exon | intron | exon | intron | exon | intron | exon | intron | exon | intron | exon |    | intron | exon | intron | exon3' |     |     |
|--------------------------------|----------------------------------|--------|--------|------|-----|--------|------|--------|------|--------------|-------------|--------|------|--------|------|--------|------|--------|------|--------|------|--------|------|----|--------|------|--------|--------|-----|-----|
| <i>Drosophila_melanogaster</i> | <a href="#">Dmel\Vha100-1</a>    | 129    | 414    | 23   | 117 | 300    | 177  | 73     | 129  | 833<br>(767) | 92<br>(158) | 431    | 101  | 595    | 42   | 450    | 127  | 86     | 1156 | 64     | 218  | 376    | 211  |    | 65     | 172  | 60     | 103    | 294 |     |
| <i>Drosophila_simulans</i>     | <a href="#">Dsim\GD21418</a>     | 88     | 413    | 23   | 117 | 304    | 177  | 73     | 129  | 819<br>(753) | 92<br>(158) | 436    | 101  | 591    | 42   | 443    | 127  | 86     | 1156 | 63     | 218  | 377    | 124  | 64 | 88     |      | 172    |        | 103 | 294 |
| <i>Drosophila_sechellia</i>    | <a href="#">Dsec\GM12768*</a>    |        |        |      | 117 | 305    | 177  | 73     | 129  | 833<br>(767) | 92<br>(158) | 446    | 101  | 591    | 42   | 427    | 127  | 86     | 1156 | 63     | 218  | 375    | 211  |    | 64     | 172  | 60     | 103    |     |     |

|                                 |                               |  |  |  |      |     |     |     |      |                |             |      |      |      |    |     |     |     |      |    |     |     |     |    |     |    |     |  |
|---------------------------------|-------------------------------|--|--|--|------|-----|-----|-----|------|----------------|-------------|------|------|------|----|-----|-----|-----|------|----|-----|-----|-----|----|-----|----|-----|--|
| <i>Drosophila_yakuba</i>        | <a href="#">Dyak\GE23836</a>  |  |  |  | 117  | 299 | 177 | 68  | 129  | 831<br>(765)   | 92<br>(158) | 472  | 101  | 640  | 42 | 436 | 127 | 85  | 1156 | 59 | 218 | 375 | 211 | 62 | 172 | 60 | 103 |  |
| <i>Drosophila_erecta</i>        | <a href="#">Dere\GG11646</a>  |  |  |  | 117  | 329 | 177 | 73  | 129  | 819<br>(753)   | 92<br>(158) | 419  | 101  | 650  | 42 | 454 | 127 | 100 | 1156 | 64 | 218 | 372 | 211 | 62 | 172 | 59 | 103 |  |
| <i>Drosophila_biarmipes</i>     | <a href="#">Dbia\Vha100-1</a> |  |  |  | 117  | 322 | 177 | 67  | 129  | 966<br>(900)   | 92<br>(158) | 417  | 101  | 707  | 42 | 400 | 127 | 391 | 1156 | 58 | 218 | 375 | 211 | 64 | 172 | 59 | 103 |  |
| <i>Drosophila_suzukii</i>       | <a href="#">Dsuz\Vha100-1</a> |  |  |  | 117  | 326 | 177 | 98  | 129  | 886<br>(820)   | 92<br>(158) | 419  | 101  | 655  | 42 | 384 | 127 | 363 | 1156 | 55 | 218 | 399 | 211 | 60 | 172 | 66 | 103 |  |
| <i>Drosophila_takahashii</i>    | <a href="#">Dtak\Vha100-1</a> |  |  |  | 117  | 289 | 177 | 157 | 129  | 989<br>(923)   | 92<br>(158) | 411  | 101  | 547  | 42 | 406 | 127 | 135 | 1156 | 59 | 218 | 335 | 211 | 63 | 172 | 66 | 103 |  |
| <i>Drosophila_eugracilis</i>    | <a href="#">Deug\Vha100-1</a> |  |  |  | 117  | 332 | 177 | 111 | 129  | 911<br>(845)   | 92<br>(158) | 397  | 101  | 549  | 42 | 432 | 127 | 122 | 1156 | 58 | 218 | 445 | 211 | 62 | 172 | 67 | 103 |  |
| <i>Drosophila_elegans</i>       | <a href="#">Dele\Vha100-1</a> |  |  |  | 117  | 390 | 177 | 173 | 129  | 885<br>(819)   | 92<br>(158) | 431  | 101  | 734  | 42 | 437 | 127 | 325 | 1156 | 53 | 218 | 412 | 211 | 62 | 172 | 58 | 103 |  |
| <i>Drosophila_rhopaloea</i>     | <a href="#">Drho\Vha100-1</a> |  |  |  | 117  | 310 | 177 | 119 | 129  | 972<br>(906)   | 92<br>(158) | 401  | 101  | 708  | 42 | 412 | 127 | 311 | 1156 | 59 | 218 | 397 | 211 | 67 | 172 | 66 | 103 |  |
| <i>Drosophila_ficusphila</i>    | <a href="#">Dfic\Vha100-1</a> |  |  |  | 117  | 421 | 177 | 99  | 129  | 809<br>(743)   | 92<br>(158) | 419  | 101  | 595  | 42 | 434 | 127 | 246 | 1156 | 63 | 218 | 383 | 211 | 63 | 172 | 65 | 103 |  |
| <i>Drosophila_kikkawai</i>      | <a href="#">Dkik\Vha100-1</a> |  |  |  | 117  | 161 | 177 | 96  | 129  | 1294<br>(1225) | 92<br>(161) | 411  | 101  | 1086 | 42 | 437 | 127 | 59  | 1156 | 60 | 218 | 576 | 211 | 68 | 172 | 61 | 106 |  |
| <i>Drosophila_bipectinata</i>   | <a href="#">Dbip\Vha100-1</a> |  |  |  | 117  | 64  | 177 | 71  | 129  | 859<br>(793)   | 92<br>(158) | 394  | 101  | 450  | 42 | 427 | 127 | 59  | 1156 | 61 | 218 | 406 | 214 | 61 | 172 | 58 | 106 |  |
| <i>Drosophila_ananassae</i>     | <a href="#">Dana\GF23290</a>  |  |  |  | 117  | 55  | 177 | 57  | 129  | 792<br>(726)   | 92<br>(158) | 405  | 101* | 458  | 42 | 401 | 127 | 58  | 1156 | 62 | 218 | 435 | 214 | 62 | 172 | 62 | 106 |  |
| <i>Drosophila_pseudoobscura</i> | <a href="#">Dpse\GA14320*</a> |  |  |  | 117  | 62  | 177 | 69  | 129* | 892<br>(826)   | 92<br>(158) | 871  | 101  | 471  | 42 | 502 | 127 | 63  | 1156 | 59 | 218 | 305 | 211 | 60 | 172 | 63 | 103 |  |
| <i>Drosophila_persimilis</i>    | <a href="#">Dper\GL23912</a>  |  |  |  | 117  | 62  | 177 | 69  | 129  | 887<br>(821)   | 92<br>(158) | 949  | 101  | 475  | 42 | 490 | 127 | 63  | 1156 | 58 | 218 | 305 | 211 | 59 | 172 | 63 | 103 |  |
| <i>Drosophila_willistoni</i>    | <a href="#">Dwil\GK11891</a>  |  |  |  | 117  | 96  | 177 | 81  | 129  | 775<br>(712)   | 92<br>(155) | 1052 | 101  | 425  | 42 | 440 | 127 | 67  | 1159 | 70 | 218 | 360 | 217 | 59 | 172 | 68 | 109 |  |
| <i>Drosophila_mojavensis</i>    | <a href="#">Dmoj\GI22777</a>  |  |  |  | 117  | 65  | 177 | 70  | 129  | 856<br>(790)   | 92<br>(158) | 628  | 101  | 439  | 42 | 343 | 127 | 63  | 1159 | 62 | 218 | 361 | 211 | 70 | 172 | 56 | 106 |  |
| <i>Drosophila_virilis</i>       | <a href="#">Dvir\GJ22780</a>  |  |  |  | 117* | 56  | 177 | 61  | 129  | 799<br>(736)   | 92<br>(155) | 626  | 101  | 456  | 42 | 289 | 127 | 62  | 1159 | 54 | 218 | 344 | 199 | 57 | 172 | 56 | 109 |  |
| <i>Drosophila_grimshawi</i>     | <a href="#">Dgri\GH17453</a>  |  |  |  | 117  | 66  | 177 | 329 | 129  | 827<br>(752)   | 92<br>(167) | 676  | 101  | 423  | 42 | 317 | 127 | 75  | 1159 | 73 | 215 | 364 | 196 | 62 | 172 | 58 | 109 |  |

Vha100-3 (CG30329) gene structure comparison in Drosophila species:

Key: UTR region, CDS region

| Species                        | Vha100-3 Atp6v0a orthologs    | 5'exon | intron | exon3' |
|--------------------------------|-------------------------------|--------|--------|--------|
| <i>Drosophila_melanogaster</i> | <a href="#">Dmel\Vha100-3</a> |        | 2715   |        |
| <i>Drosophila_sechellia</i>    | <a href="#">Dsec\GM19860</a>  |        | 2715   |        |
| <i>Drosophila_yakuba</i>       | <a href="#">Dyak\GE13869</a>  |        | 2736   |        |
| <i>Drosophila_erecta</i>       | <a href="#">Dere\GG20932</a>  |        | 2688   |        |
| <i>Drosophila_biarmipes</i>    | <a href="#">Dbia\Vha100-3</a> |        |        |        |

|                                 |                               |     |      |       |  |  |
|---------------------------------|-------------------------------|-----|------|-------|--|--|
| <i>Drosophila_suzukii</i>       | <a href="#">Dsuz\Vha100-3</a> |     | 2760 |       |  |  |
| <i>Drosophila_takahashii</i>    | Dtak\Vha100-3                 |     |      |       |  |  |
| <i>Drosophila_eugracilis</i>    | Deug\Vha100-3                 |     |      |       |  |  |
| <i>Drosophila_elegans</i>       | Dele\Vha100-3                 |     |      |       |  |  |
| <i>Drosophila_rhopaloea</i>     | Drho\Vha100-3                 |     |      |       |  |  |
| <i>Drosophila_ficusphila</i>    | Dfic\Vha100-3                 |     |      |       |  |  |
| <i>Drosophila_kikkawai</i>      | Dkik\Vha100-3                 |     |      |       |  |  |
| <i>Drosophila_bipectinata</i>   | Dbip\Vha100-3                 |     |      |       |  |  |
| <i>Drosophila_ananassae</i>     | <a href="#">Dana\GF13738</a>  | 980 | 64   | 1897? |  |  |
| <i>Drosophila_pseudoobscura</i> | <a href="#">Dpse\GA15764</a>  |     | 2706 |       |  |  |
| <i>Drosophila_persimilis</i>    | <a href="#">Dper\GL10577</a>  |     | 2706 |       |  |  |
| <i>Drosophila_willistoni</i>    | <a href="#">Dwil\GK20688</a>  |     | 2622 |       |  |  |
| <i>Drosophila_mojavensis</i>    | <a href="#">Dmoj\GI20149</a>  |     | 2613 |       |  |  |
| <i>Drosophila_virilis</i>       | <a href="#">Dvir\GJ22427</a>  |     | 2613 |       |  |  |
| <i>Drosophila_grimshawi</i>     | <a href="#">Dgrl\GH19727</a>  |     | 2610 |       |  |  |

Vha100-4 (CG7678) gene structure comparison:

Key: UTR region, CDS region

| Species                         | Vha100-4<br>Atp6v0a<br>orthologs | exon |     | intron | exon  | intron | exon | intron | exon | intron | exon3' |     |
|---------------------------------|----------------------------------|------|-----|--------|-------|--------|------|--------|------|--------|--------|-----|
| <i>Drosophila_melanogaster</i>  | <a href="#">Dmel\Vha100-4</a>    | 85   | 153 | 119    | 1872  |        |      | 62     | 244  | 56     | 266    | 114 |
| <i>Drosophila_simulans</i>      | <a href="#">Dsim\GD20171</a>     |      | 153 | 127    | 1872  |        |      | 62     | 244  | 56     | 266    |     |
| <i>Drosophila_sechellia</i>     | Dsec\Vha100-4                    |      | 153 | 127    | 1872* |        |      | 62     | 244  | 56     | 266    |     |
| <i>Drosophila_yakuba</i>        | <a href="#">Dyak\GE25200</a>     |      | 144 | 111    | 1872  |        |      | 58     | 244  | 56     | 266    |     |
| <i>Drosophila_erecta</i>        | <a href="#">Dere\GG16473*</a>    |      | ND  | ND     | >1713 |        |      | 57     | 244  | 56     | 266    |     |
| <i>Drosophila_biarmipes</i>     | <a href="#">Dbia\Vha100-4</a>    |      | 153 | 121    | 1872  |        |      | 63     | 244  | 56     | 266    |     |
| <i>Drosophila_suzukii</i>       | <a href="#">Dsuz\Vha100-4</a>    |      | 153 | 117    | 1872  |        |      | 59     | 244  | 55     | 266    |     |
| <i>Drosophila_takahashii</i>    | <a href="#">Dtak\Vha100-4</a>    |      | 144 | 1461   | 1872  |        |      | 403    | 244  | 56     | 266    |     |
| <i>Drosophila_eugracilis</i>    | <a href="#">Deug\Vha100-4</a>    |      | 153 | 132    | 1872  |        |      | 60     | 244  | 54     | 266    |     |
| <i>Drosophila_elegans</i>       | <a href="#">Dele\Vha100-4</a>    |      | 153 | 97     | 1872  |        |      | 62     | 244  | 56     | 266    |     |
| <i>Drosophila_rhopaloea</i>     | <a href="#">Drho\Vha100-4</a>    |      | 153 | 396    | 1872  |        |      | 66     | 244  | 56     | >206   |     |
| <i>Drosophila_ficusphila</i>    | <a href="#">Dfic\Vha100-4</a>    |      | 153 | 101    | 1872  |        |      | 53     | 244  | 56     | 266    |     |
| <i>Drosophila_kikkawai</i>      | <a href="#">Dkik\Vha100-4</a>    |      | 153 | 79     | 1872  |        |      | 65     | 235  | 59     | 266    |     |
| <i>Drosophila_bipectinata</i>   | <a href="#">Dbip\Vha100-4</a>    |      | 153 | 66     | 1872  |        |      | 50     | 244  | 55     | 266    |     |
| <i>Drosophila_ananassae</i>     | <a href="#">Dana\GF18113</a>     |      | 153 | 66     | 1872  |        |      | 50     | 244  | 62     | 266    |     |
| <i>Drosophila_pseudoobscura</i> | <a href="#">Dpse\GA20518</a>     |      | 153 | 62     | 1872  |        |      | 67     | 238  | 59     | 266    |     |
| <i>Drosophila_persimilis</i>    | <a href="#">Dper\GL24346</a>     |      | 153 | 62     | 1872  |        |      | 67     | 238  | 59     | 266    |     |
| <i>Drosophila_miranda</i>       | <a href="#">Dmir\Vha100-4</a>    |      | 153 | 62     | 1872  |        |      | 67     | 238  | 59     | 266    |     |

|                              |                              |  |     |    |      |    |      |    |     |     |     |  |
|------------------------------|------------------------------|--|-----|----|------|----|------|----|-----|-----|-----|--|
| <i>Drosophila_willistoni</i> | <a href="#">Dwi\GK11491</a>  |  | 174 | 70 | 1872 |    |      | 66 | 241 | 59  | 266 |  |
| <i>Drosophila_mojavensis</i> | <a href="#">Dmoj\GI24259</a> |  | 159 | 62 | 417  | 62 | 1455 | 55 | 247 | 56  | 266 |  |
| <i>Drosophila_virilis</i>    | <a href="#">Dvir\GJ10833</a> |  | 159 | 56 | 417  | 64 | 1455 | 51 | 259 | 56  | 266 |  |
| <i>Drosophila_grimshawi</i>  | <a href="#">Dgr\GH19225</a>  |  | 159 | 63 | 417  | 59 | 1455 | 54 | 247 | 316 | 269 |  |

**Vha100-5 (CG12602) gene structure comparison in Drosophila species:**

Key: UTR region, CDS region

| Species                         | Vha100-5<br>Atp6v0a<br>orthologs | 5'<br>exon | intron | exon |       | intron | exon | intron | exon3' |  |
|---------------------------------|----------------------------------|------------|--------|------|-------|--------|------|--------|--------|--|
| <i>Drosophila_melanogaster</i>  | <a href="#">Dmel\Vha100-5</a>    | 85         | 2493   | 21   | 2179  | 104    | 172  | 62     | 94     |  |
| <i>Drosophila_simulans</i>      | <a href="#">Dsim\GD23787*</a>    |            |        |      | 2179  | 105    | 172  | 63     | 94     |  |
| <i>Drosophila_sechellia</i>     | <a href="#">Dsec\GM19181</a>     |            |        |      | 2179  | 96     | 172  | 63     | 94     |  |
| <i>Drosophila_yakuba</i>        | <a href="#">Dyak\GE18538</a>     |            |        |      | 2179  | 97     | 172  | 61     | 94     |  |
| <i>Drosophila_erecta</i>        | <a href="#">Dere\GG23732</a>     |            |        |      | 2179  | 115    | 172  | 61     | 94     |  |
| <i>Drosophila_biarmipes</i>     | <a href="#">Dbia\Vha100-5</a>    |            |        |      | 2179  | 357    | 172  | 58     | 94     |  |
| <i>Drosophila_suzukii</i>       | <a href="#">Dsuz\Vha100-5</a>    |            |        |      | ND    | ND     | 172  | 62     | 94     |  |
| <i>Drosophila_takahashii</i>    | <a href="#">Dtak\Vha100-5</a>    |            |        |      | 2179  | 389    | 172  | 64     | 94     |  |
| <i>Drosophila_eugracilis</i>    | <a href="#">Deug\Vha100-5</a>    |            |        |      |       |        |      |        |        |  |
| <i>Drosophila_elegans</i>       | <a href="#">Dele\Vha100-5</a>    |            |        |      | 2179  | 819    | 172  | 67     | 94     |  |
| <i>Drosophila_rhopaloea</i>     | <a href="#">Drho\Vha100-5</a>    |            |        |      | 2179  | 1201   | 172  | 63     | 94     |  |
| <i>Drosophila_ficusphila</i>    | <a href="#">Dfic\Vha100-5</a>    |            |        |      | 2188  | 576    | 172  | 795    | 94     |  |
| <i>Drosophila_kikkawai</i>      | <a href="#">Dkik\Vha100-5</a>    |            |        |      | 2182  | 73     | 172  | 64     | 94     |  |
| <i>Drosophila_bipectinata</i>   | <a href="#">Dbip\Vha100-5</a>    |            |        |      | 2167  | 302    | 172  | 58     | 94     |  |
| <i>Drosophila_ananassae</i>     | <a href="#">Dana\GF14569</a>     |            |        |      | 2167  | 311    | 172  | 59     | 94     |  |
| <i>Drosophila_pseudoobscura</i> | <a href="#">Dpse\GA11714</a>     |            |        |      | 2206  | 64     | 172  | 63     | 94     |  |
| <i>Drosophila_persimilis</i>    | <a href="#">Dper\GL19314</a>     |            |        |      | 2194  | 64     | 172  | 63     | 94     |  |
| <i>Drosophila_miranda</i>       | <a href="#">Dmir\Vha100-5</a>    |            |        |      | 2191  | 71     | 172  | 68     | 94     |  |
| <i>Drosophila_willistoni</i>    | <a href="#">Dwi\GK24362*</a>     |            |        |      | 2197* | 65     | 172  | 67     | 91     |  |
| <i>Drosophila_mojavensis</i>    | <a href="#">Dmoj\GI18075</a>     |            |        |      | 2191  | 355    | 172  | 68     | 94     |  |
| <i>Drosophila_virilis</i>       | <a href="#">Dvir\GI16665</a>     |            |        |      | 2191  | 70     | 172  | 67     | 94     |  |
| <i>Drosophila_grimshawi</i>     | <a href="#">Dgr\GH11370</a>      |            |        |      | 2185  | 63     | 172  | 71     | 94     |  |
