# Supplementary material for: Structural and Comparative Analyses of Insects Suggest the Presence of an Ultra-Conserved Regulatory Element of the Genes Encoding Vacuolar-Type ATPase Subunits and Assembly Factors
Source: MDPI journal article supplement (doi:10.3390/biology12081127), 2023-08-13
Supplement: s1 [file s1]

| Gene Cluster ID                     | Atp6v0b                                                 |
|-------------------------------------|---------------------------------------------------------|
| <b>Drosophila melanogaster gene</b> | <b>VhaPPA1-1 (CG7007)</b>                               |
| FlyBase ID                          | <a href="#">FBgn0028662</a>                             |
| <b>Predicted function</b>           | <b>ATPase, H<sup>+</sup> transporting, V0 subunit b</b> |
| Protein size                        | 212 amino acids                                         |
| Cytogenetic map                     | 3R:88D6-88D6                                            |
| Gene sequence location              | <a href="#">3R:10728048..10729796</a> [-]               |
| <b>Dmel CLEAR sequence</b>          | <b>TCATGTGA</b>                                         |
| CLEAR sequence location             | 3R: 10729742.. 10729749[-]                              |
| Drosophila Atp6v0b paralog          | <a href="#">VhaPPA1-2</a> (CG7026)                      |

FlyBase VhaPPA1-1 (CG7007)gene model & CLEAR element (red) position:

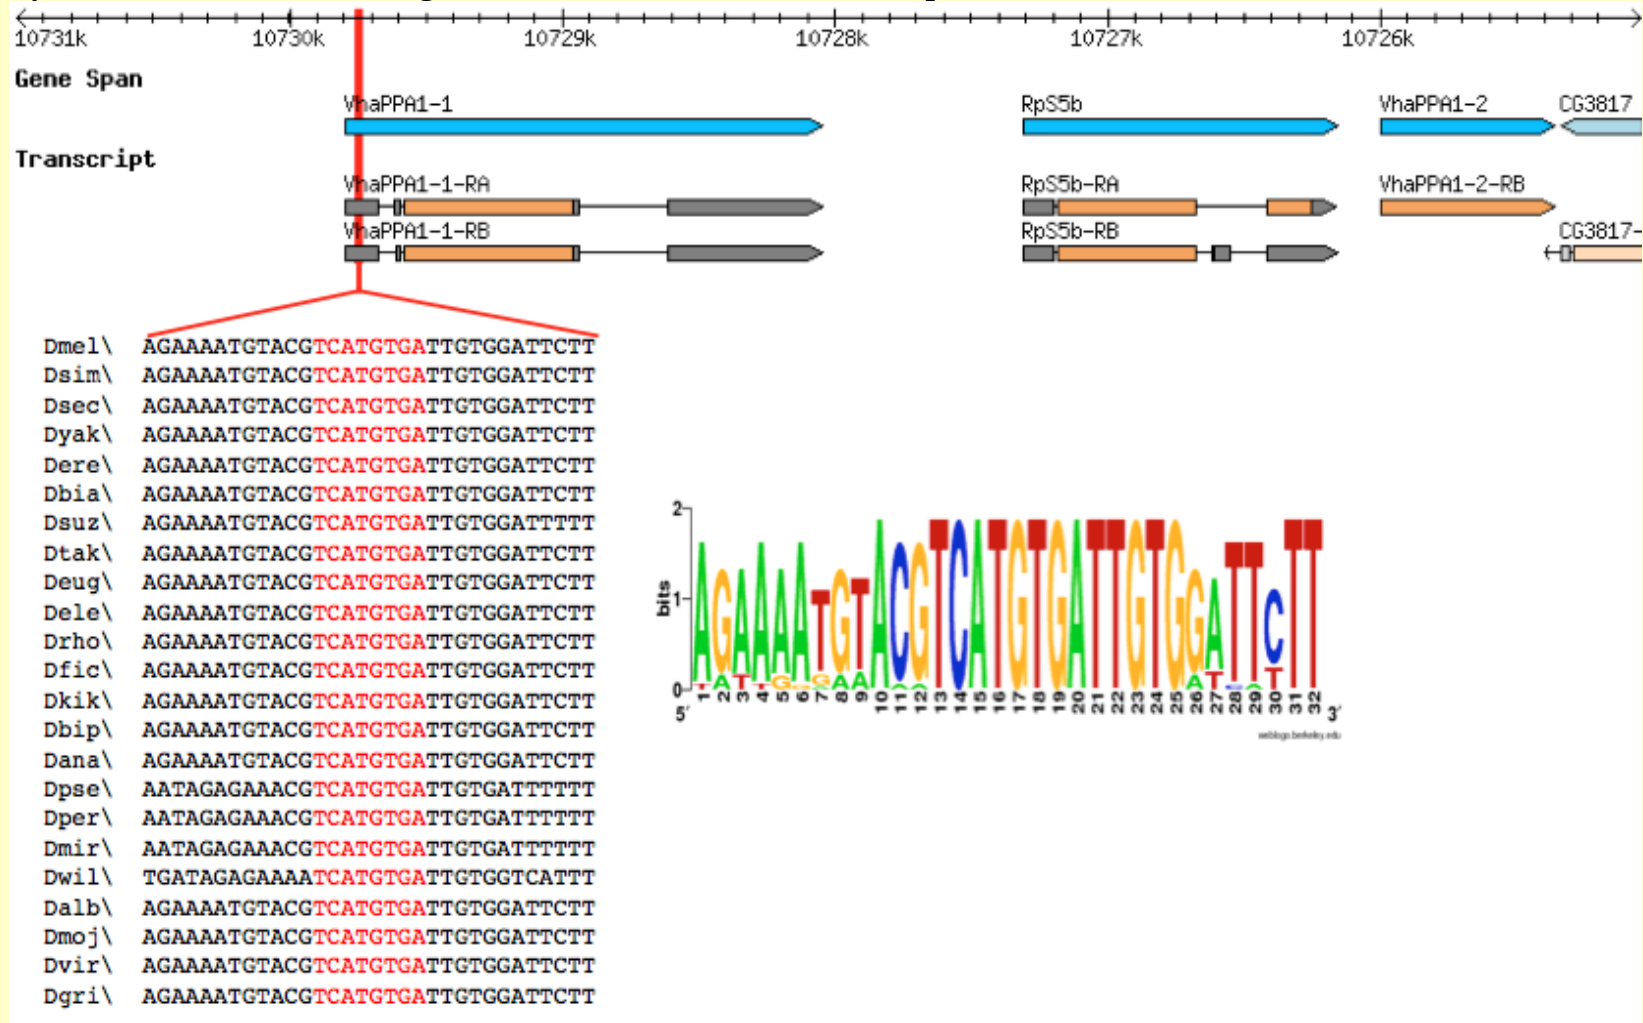

Atp6v0b gene structure comparison:

Key: UTR region, CDS region

| Species                        | Atp6v0b orthologs             | 5'exon | intron | exon3'     | Extended CLEAR region            | Position | bps from TSS |
|--------------------------------|-------------------------------|--------|--------|------------|----------------------------------|----------|--------------|
| <i>Drosophila_melanogaster</i> | <a href="#">DmelVhaPPA1-1</a> | 124    | 59     | 19 639 502 | agaaaatgtacgTCATGTGAttgtggattctt | 5'UTR    | 47           |

|                                 |                                |  |  |  |     |  |                                  |        |  |
|---------------------------------|--------------------------------|--|--|--|-----|--|----------------------------------|--------|--|
| <i>Drosophila_simulans</i>      | <a href="#">Dsim\GD20390</a>   |  |  |  | 639 |  | agaaaatgtacgTCATGTGAttgtggattctt | 5'UTR? |  |
| <i>Drosophila_sechellia</i>     | <a href="#">Dsec\GM25814</a>   |  |  |  | 639 |  | agaaaatgtacgTCATGTGAttgtggattctt | 5'UTR? |  |
| <i>Drosophila_yakuba</i>        | <a href="#">Dyak\GE26419</a>   |  |  |  | 639 |  | agaaaatgtacgTCATGTGAttgtggattctt | 5'UTR? |  |
| <i>Drosophila_erecta</i>        | <a href="#">Dere\GG20968</a>   |  |  |  | 639 |  | agaaaatgtacgTCATGTGAttgtggattctt | 5'UTR? |  |
| <i>Drosophila_biarmipes</i>     | <a href="#">Dbia\VhaPPA1-1</a> |  |  |  | 639 |  | agaaaatgtacgTCATGTGAttgtggattctt | 5'UTR? |  |
| <i>Drosophila_suzukii</i>       | <a href="#">Dsuz\VhaPPA1-1</a> |  |  |  | 639 |  | agaaaatgtacgTCATGTGAttgtggattttt | 5'UTR? |  |
| <i>Drosophila_takahashii</i>    | <a href="#">Dtak\VhaPPA1-1</a> |  |  |  | 639 |  | agaaaatgtacgTCATGTGAttgtggattctt | 5'UTR? |  |
| <i>Drosophila_eugracilis</i>    | <a href="#">Deug\VhaPPA1-1</a> |  |  |  | 639 |  | agaaaatgtacgTCATGTGAttgtggattctt | 5'UTR? |  |
| <i>Drosophila_elegans</i>       | <a href="#">Dele\VhaPPA1-1</a> |  |  |  | 639 |  | agaaaatgtacgTCATGTGAttgtggattctt | 5'UTR? |  |
| <i>Drosophila_rhopaloea</i>     | <a href="#">Drho\VhaPPA1-1</a> |  |  |  | 639 |  | agaaaatgtacgTCATGTGAttgtggattctt | 5'UTR? |  |
| <i>Drosophila_ficusphila</i>    | <a href="#">Dfic\VhaPPA1-1</a> |  |  |  | 639 |  | agaaaatgtacgTCATGTGAttgtggattctt | 5'UTR? |  |
| <i>Drosophila_kikkawai</i>      | <a href="#">Dkik\VhaPPA1-1</a> |  |  |  | 639 |  | agaaaatgtacgTCATGTGAttgtggattctt | 5'UTR? |  |
| <i>Drosophila_bipectinata</i>   | <a href="#">Dbip\VhaPPA1-1</a> |  |  |  | 639 |  | agaaaatgtacgTCATGTGAttgtggattctt | 5'UTR? |  |
| <i>Drosophila_ananassae</i>     | <a href="#">Dana\GF17169</a>   |  |  |  | 639 |  | agaaaatgtacgTCATGTGAttgtggattctt | 5'UTR? |  |
| <i>Drosophila_pseudoobscura</i> | <a href="#">Dpse\GA20025</a>   |  |  |  | 639 |  | aatagagaaacgTCATGTGAttgtgattttt  | 5'UTR? |  |
| <i>Drosophila_persimilis</i>    | <a href="#">Dper\GL21698</a>   |  |  |  | 639 |  | aatagagaaacgTCATGTGAttgtgattttt  | 5'UTR? |  |
| <i>Drosophila_miranda</i>       | <a href="#">Dmir\VhaPPA1-1</a> |  |  |  | 639 |  | aatagagaaacgTCATGTGAttgtgattttt  | 5'UTR? |  |
| <i>Drosophila_willistoni</i>    | <a href="#">Dwi\NGK11008</a>   |  |  |  | 639 |  | tgatagagaaaaTCATGTGAttgtggtcattt | 5'UTR? |  |
| <i>Drosophila_albomicans</i>    | <a href="#">Dalb\VhaPPA1-1</a> |  |  |  | 639 |  | agaaaatgtacgTCATGTGAttgtggattctt | 5'UTR? |  |
| <i>Drosophila_mojavensis</i>    | <a href="#">Dmoj\GI22994</a>   |  |  |  | 639 |  | agaaaatgtacgTCATGTGAttgtggattctt | 5'UTR? |  |
| <i>Drosophila_virilis</i>       | <a href="#">Dvir\GI24692</a>   |  |  |  | 639 |  | agaaaatgtacgTCATGTGAttgtggattctt | 5'UTR' |  |
| <i>Drosophila_grimshawi</i>     | <a href="#">Dgri\GH19517</a>   |  |  |  | 639 |  | agaaaatgtacgTCATGTGAttgtggattctt | 5'UTR? |  |

Paralog: VhaPPA1-2 (CG7026)

|                                 |                                     |  |  |  |     |  |  |  |  |
|---------------------------------|-------------------------------------|--|--|--|-----|--|--|--|--|
| <i>Drosophila_melanogaster</i>  | <a href="#">Dmel\VhaPPA1-<br/>2</a> |  |  |  | 639 |  |  |  |  |
| <i>Drosophila_simulans</i>      | <a href="#">Dsim\GD20392</a>        |  |  |  | 627 |  |  |  |  |
| <i>Drosophila_sechellia</i>     | <a href="#">Dsec\GM25816</a>        |  |  |  | 627 |  |  |  |  |
| <i>Drosophila_yakuba</i>        | <a href="#">Dyak\GE26421</a>        |  |  |  | 639 |  |  |  |  |
| <i>Drosophila_erecta</i>        | <a href="#">Dere\GG20990</a>        |  |  |  | 627 |  |  |  |  |
| <i>Drosophila_biarmipes</i>     | <a href="#">Dbia\VhaPPA1-<br/>2</a> |  |  |  | 627 |  |  |  |  |
| <i>Drosophila_suzukii</i>       | <a href="#">Dsuz\VhaPPA1-<br/>2</a> |  |  |  | 627 |  |  |  |  |
| <i>Drosophila_takahashii</i>    | <a href="#">Dtak\VhaPPA1-<br/>2</a> |  |  |  | 627 |  |  |  |  |
| <i>Drosophila_eugracilis</i>    | <a href="#">Deug\VhaPPA1-<br/>2</a> |  |  |  | 627 |  |  |  |  |
| <i>Drosophila_elegans</i>       | <a href="#">Dele\VhaPPA1-<br/>2</a> |  |  |  | 627 |  |  |  |  |
| <i>Drosophila_rhopaloea</i>     | <a href="#">Drho\VhaPPA1-<br/>2</a> |  |  |  | 627 |  |  |  |  |
| <i>Drosophila_ficusphila</i>    | <a href="#">Dfic\VhaPPA1-2</a>      |  |  |  | 627 |  |  |  |  |
| <i>Drosophila_kikkawai</i>      | <a href="#">Dkik\VhaPPA1-<br/>2</a> |  |  |  | 627 |  |  |  |  |
| <i>Drosophila_bipectinata</i>   | <a href="#">Dbip\VhaPPA1-<br/>2</a> |  |  |  | 627 |  |  |  |  |
| <i>Drosophila_ananassae</i>     | <a href="#">Dana\GF17172*</a>       |  |  |  | 627 |  |  |  |  |
| <i>Drosophila_pseudoobscura</i> | <a href="#">Dpse\GA26375</a>        |  |  |  | 624 |  |  |  |  |
| <i>Drosophila_persimilis</i>    | <a href="#">Dper\GL21700</a>        |  |  |  | 624 |  |  |  |  |
| <i>Drosophila_miranda</i>       | <a href="#">Dmir\VhaPPA1-<br/>2</a> |  |  |  | 624 |  |  |  |  |
| <i>Drosophila_willistoni</i>    | <a href="#">Dwil\GK13787</a>        |  |  |  | 630 |  |  |  |  |
| <i>Drosophila_albomicans</i>    | <a href="#">Dalb\VhaPPA1-<br/>2</a> |  |  |  | 621 |  |  |  |  |
| <i>Drosophila_mojavensis</i>    | <a href="#">Dmoj\GI22996</a>        |  |  |  | 624 |  |  |  |  |
| <i>Drosophila_virilis</i>       | <a href="#">Dvir\GJ24694</a>        |  |  |  | 624 |  |  |  |  |

|                             |                              |  |  |  |     |  |  |  |
|-----------------------------|------------------------------|--|--|--|-----|--|--|--|
| <i>Drosophila_grimshawi</i> | <a href="#">Dgri\GH19519</a> |  |  |  | 624 |  |  |  |
|-----------------------------|------------------------------|--|--|--|-----|--|--|--|

Key: UTR region, CDS region
