# Supplementary material for: Structural and Comparative Analyses of Insects Suggest the Presence of an Ultra-Conserved Regulatory Element of the Genes Encoding Vacuolar-Type ATPase Subunits and Assembly Factors
Source: MDPI journal article supplement (doi:10.3390/biology12081127), 2023-08-13
Supplement: s1 [file s1]

| Gene Cluster ID              | Atp6v1B                                                   |
|------------------------------|-----------------------------------------------------------|
| Drosophila melanogaster gene | Vha55 (CG17369)                                           |
| FlyBase ID                   | <a href="#">FBgn0005671</a>                               |
| Predicted function           | ATPase, H+ transporting, lysosomal 56/58kDa, V1 subunit B |

Atp6v1B CLEAR element conservation:

|       | <u>5'/5'UTR</u>           | <u>intron</u>                    | <u>intron</u>            | <u>intron</u>      |
|-------|---------------------------|----------------------------------|--------------------------|--------------------|
| Dmel\ | CGGGTCACGTGACGGC          | GCCGTCACATGACCGT                 | ACAGTCAGCTGACATA         | ACTTTCATGTGAGCAT   |
| Mdom\ | TTAATCACATGACAGC          | AATGTCATGTGACTTG                 | CGAGTCAGCTGACCTT         | TCTATCATGTGAGACA   |
| Ccap\ | TTGGTCACATGACCGC          | GCCGTCATGTGACATT                 | GCAGTCAGCTGACGTT         |                    |
| Gmor\ | TCAATCACATGACAGC          | TCAGTCATGTGATTAA                 |                          |                    |
| Llon\ | TGTGTCACATGACATT          | TTGGTCATATGACACC                 |                          |                    |
| Ppap\ | CCAGTCACATGACATT          | TTGGTCATATGACCTT                 |                          |                    |
|       | <u>5'/5'UTR</u>           | <u>intron</u>                    | <u>intron</u>            |                    |
| Agam\ | TTCAATCACATGACAGA         | GATGTCATGTGACGGG                 | GGTGTTTTGATGTCACATGACTGT |                    |
| Agan\ | TTCAATCACATGACAGA         | GATGTCATGTGACGAG                 | GGTGTTTTGATGTCACATGACTGT |                    |
| Aara\ | TTCAATCACATGACAGA         | GATGTCATGTGACGAG                 | GGTGTTTTGATGTCACATGACTGT |                    |
| Achr\ | TTCAATCACATGACAGA         | GATGTCATGTGACGAG                 | AGTGTTTTGATGTCACATGACTGT |                    |
| Aepi\ | TTCAATCACATGACAGA         | GGAGTCATGTGACGTG                 | AGTGTTTTGATGTCACATGACTGT |                    |
| Amin\ | TTCAATCACATGACAGA         | TGTGTCATGTGACGGT                 | ACTGTTTTGATGTCACATGACTGT |                    |
| Afun\ | TTCAATCACATGACAGA         | TGTGTCATGTGACGGT                 | ACTGTTTTGATGTCACATGACTGT |                    |
| Aste\ | TTCAATCACATGACAGA         | TGTGTCATGTGATATG                 | ACTGTTTTGATGTCACATGACTGT |                    |
| Anil\ | TTCAATCACATGACAGT         | GTCGTCATGTGACGAT                 | CCTGTTTTGATGTCACATGACTGT |                    |
| Adir\ | -----                     | TACGTCATGTGACGGT                 | ACTGTTTTGATGTCACATGACTGT |                    |
| Aalb\ | -----                     | -----                            | TCGTTTTGATGTCACATGACTGT  |                    |
| Adar\ | -----                     | -----                            | TCGTTTTGATGTCACATGACTGT  |                    |
| Aaeg\ | TGTTTCACATGACAAC          | AGTGTTCATGTGATAAC                | TCGTTTTGATGTCACATGACTGT  |                    |
| Cqui\ | GCTGTTCACATGAGAG          | TGTGTCATGTGATAAC                 | TCGTTTTGATGTCACATGACACC  |                    |
| Mdes\ | AAAGTCACATGACAGC          | CATGTCATGTGACCTA                 | ATAATCATATGAAAA          |                    |
|       | <u>5'/5'UTR</u>           | <u>intron</u>                    | <u>intron</u>            | <u>intron</u>      |
| Bmor\ | TGGGTCACGTGACAGCACGTGAAG  | TCAGTCACATGAAATT                 |                          |                    |
| Msex\ | TGGGTCACGTGACGGCACGTGAAG  | TATATCACATGATGAA                 |                          |                    |
| Dple\ | TAGATCACGTGACAGCACGTGAAG  | AATATCACATGATCAA                 |                          |                    |
| Hmel\ | TAGGTCACGTGACAGCACGTGAAG  | AGGATCACATGACTTC                 |                          |                    |
| Pxyl\ | CGGGTCACGTGACAGCACGTGAAG  | GAAATCATATGACCTA                 |                          |                    |
| Tcas\ | GCCGTCACGTGACGACACGTGAAT  | CGGGTCATATGACCAA                 | GTGTTCATGTGACCGA         |                    |
| Dpon\ | AGCAATCACATGAGTCAATGAGA   | -----                            | CATGTTCATGTGACATC        |                    |
| Amel\ | TAAGCCACGTGATCGCACGTGCCA  | ATAGTCAGCTGATTCT                 | TCCAATCATGTGACTGG        |                    |
| Aflo\ | TAAAGCCACGTGATGCGACGTGCCA | GTAGTCAGCTGATTTT                 | TCTATTCATGTGACTAG        |                    |
| Bter\ | TAAGCCACGTGATCGCACGTGCCA  | GTAGTCAGCTGATTCT                 | TGTAATCATGTGACTAT        |                    |
| Bimp\ | TAAGCCACGTGATCGCACGTGCCA  | GTAGTCAGCTGATTCT                 | TGTAATCATGTGACTAT        |                    |
| Mrot\ | CAAGCCACGTGATCGCACGTGCCA  | CTAATCAGCTGATTCA                 | TCTGTTCATGTGACTGT        |                    |
| Aech\ | CGGGCCACGTGATTGACGTGCCT   | GGAGTCAGCTGATCTT                 | AGCGTCATGTGACCAT         |                    |
| Acep\ | CGAGCCACGTGATTGACGTGCCT   | GGAGTCAGCTGATCTC                 | AGCAATCATGTGATCAT        |                    |
| Pbar\ | CGAGCCACGTGATTGACGTGCCT   | GGGGTCAGCTGATTCC                 | AGCAATCATGTGACTGC        |                    |
| Sinv\ | CCGGCCACGTGATTGACGTGCCT   | CGGGTCAGCTGATCTC                 | AGCGTCATGTGACTGC         |                    |
| Lhum\ | CGAGCCACGTGATTGACGTGCCT   | TGGGTCAGCTGATCCC                 | AGCGTCATGTGACTGC         | AATATTCACATGATTTTA |
| Hsal\ | CGAGCCACGTGATTGACGTGCCT   | TGGGTCAGCTGATCCC                 | GGCGTCATGTGACTAC         |                    |
| Cflo\ | CAAGCCACGTGATTGACGTGCCT   | TGCATCAGCTGATCCC                 | CTTGTTCATGTGACTGC        |                    |
| Ngir\ | CGAGCCACGTGATCCACGTGCTT   | CTGGTCAGCTGATCGG                 | TGTGTCATGTGACTGC         | GGAGTCATGTGACACG   |
| Nlon\ | CGAGCCACGTGATCCACGTGCTT   | CTGGTCAGCTGATCGG                 | TGTGTCATGTGACTGC         | GGAGTCATGTGACACG   |
| Nvit\ | CGAGCCACGTGATCCACGTGCTT   | CTGGTCAGCTGATCGG                 | TGTGTCATGTGACTGC         | GGAGTCATGTGACACG   |
| Phum\ | CTTGTCATGTGATTTCACGTGATC  |                                  |                          |                    |
| Lful\ | ctggTCACGTGATTCACGTGAtt   |                                  |                          |                    |
| Dpul\ | tctgacagTCATATGAtcgagaga  |                                  |                          |                    |
| Isca\ |                           | tggtagtagcggTCATGTGActcaggatgtca |                          |                    |

Atp6v1B gene structure comparison:

Legend: UTR region. CDS region INTRON

| Order                   | Species                          | Atp6v1B orthologs                                          | 5'exon     | intron | exon |                                        |    | intron                    | exon3'            | Extended CLEAR region | Position | bps from TSS                                                                                                                              |                                        |                                                                                                          |                          |                       |
|-------------------------|----------------------------------|------------------------------------------------------------|------------|--------|------|----------------------------------------|----|---------------------------|-------------------|-----------------------|----------|-------------------------------------------------------------------------------------------------------------------------------------------|----------------------------------------|----------------------------------------------------------------------------------------------------------|--------------------------|-----------------------|
| Diptera (Drosophilidae) | <i>Drosophila_melanogaster</i>   | <a href="#">Dmel\Vha55</a>                                 | 308        | 73     | 1221 | 1262                                   |    |                           | 61                | 138                   | 1005     | acgcgtgacgggTCATGTGAcggcacgtgacg<br>aaattttcccgTCACATGAcgttcgtcgtc<br>ccagttggacagTCAGCTGAcataattagcc<br>agattccgactTCATGTGAacattgcgcgac  | 5'UTR<br>intron1<br>intron1<br>intron1 | 45<br>701<br>1052<br>1141                                                                                |                          |                       |
| Diptera (Muscidae)      | <i>Musca_domestica</i>           | <a href="#">Mdom\Atp6v1B</a>                               | ND         | 79     | 1522 | 1262 (506+756)                         |    |                           | 644               | 138                   |          | ggatttcgttaaTCACATGAcagcacgtgaga<br>ttttactgaagTCATGTGAactgtttttgct<br>ttttgtcacagTCAGCTGActttattgcttt<br>tggttttaictaTCATGTGAacattaaacat | 5'<br>intron1<br>intron1<br>intron1    | >-331<br>>561<br>>1320<br>>1553                                                                          |                          |                       |
| Diptera ( Tephritidae)  | <i>Ceratitis_capitata</i>        | <a href="#">Ccap\Atp6v1B</a>                               | ND         | 79     | 926  | 506                                    | 71 | 756                       | 102               | 138                   | ND       | ctctgcctttggTCACATGAcggcacgtgaca<br>catttagtcgcgTCATGTGAcattgggtgtgc<br>ttcaatttcgagTCAGCTGAcgttcgttacgt                                  | 5'<br>intron1<br>intron1               | >-315<br>>425<br>>805                                                                                    |                          |                       |
| Diptera (Glossinidae)   | <i>Glossina_morsitans</i>        | <a href="#">Gmor\Atp6v1B</a>                               | 265        | 67     | 599  | 506 (119+130+132+125)                  | 64 | 756 (231+103+155+138+129) | 58                | 138                   | ND       | acattttacaaTCACATGAcagcacgtgagt<br>tatcttttcagTCATGTGAttaacttcagag                                                                        | 5'<br>intron1                          | 53<br>656                                                                                                |                          |                       |
| Diptera (Psychodidae)   | <i>Lutzomyia_longipalpis</i>     | <a href="#">Llon\Atp6v1B</a>                               | ND         | 73     | 85   | 995                                    |    | 1586                      | 405               |                       | ND       | caacctgaggggTCACATGAaactcgttttaa<br>acgattttttgTCACATGAacattttgtctca<br>cttccactttggTCATATGAacctccataic                                   | 5'<br>5'<br>5'                         | >-556<br>>-511<br>>-125                                                                                  |                          |                       |
|                         | <i>Phlebotomus_papatasi</i>      | <a href="#">Ppap\Atp6v1B</a>                               | 145+347+27 | 73     | 599  | 995 (119+130+132+125+231+103+155)      |    | ND                        | 405 (138+129+138) |                       | 325      | atccgtcccagTCACATGAacatttctctag<br>cttccactttggTCATATGAacccataicic                                                                        | 5'<br>intron1                          | >-22<br>385                                                                                              |                          |                       |
| Diptera (Culicidae)     | <i>Anopheles_gambiae</i>         | <a href="#">Agam\Atp6v1B</a><br><a href="#">AGAP002884</a> | 91+96+63   | 97     | 1051 | 326                                    | 67 | 1074                      |                   |                       | 361      | ttcgtttctcaTCACATGAcagaattataa<br>gcccgcaagatgTCATGTGAcggcggtgaag<br>ggtgttttgatTCACATGActgtcaaaacac<br>gtgtgcgcgtcTCACATGAtagattttctt    | 5'<br>intron2<br>intron2<br>intron2    | -20<br>467<br>822<br>1182                                                                                |                          |                       |
|                         | <i>Anopheles_arabiensis</i>      | <a href="#">Aara\Atp6v1B</a>                               | ND         | 97     | 1054 | 326                                    | 67 | 1074                      |                   |                       | ND       | ttcgtttctcaTCACATGAcagaattataa<br>gcccgctagatgTCATGTGAcagcggtgaag<br>ggtgttttgatTCACATGActgtcaaaacac<br>gtgtgcgcgtcTCACATGAtagattttctt    | 5'<br>intron2?<br>intron2?<br>intron2? | >-271<br>>217<br>>476<br>>935                                                                            |                          |                       |
|                         | <i>Anopheles_quadriannulatus</i> | <a href="#">Aqan\Atp6v1B</a>                               | ND         | 97     | 1061 | 326                                    | 67 | 1074                      |                   |                       | ND       | ttcgtttctcaTCACATGAcagaattataa<br>gcccgcaagatgTCATGTGAcagcggtgaag<br>ggtgttttgatTCACATGActgtcaaaacac<br>gtgtgcgcgtcTCACATGAtagattttctt    | 5'<br>intron2?<br>intron2?<br>intron2? | >-264<br>>218<br>>572<br>>944                                                                            |                          |                       |
|                         | <i>Anopheles_christyi</i>        | <a href="#">Achr\Atp6v1B</a>                               | ND         | 97     | 998  | 326                                    | 62 | 1074                      |                   |                       | ND       | ttcgtttctcaTCACATGAcagaatccataa<br>gtctgtcgatgTCATGTGAcagcggtgaag<br>agtgttttgatTCACATGActgtcaaaacac<br>taagccctcgtTCACATGAatcctcgtcgc    | 5'<br>intron2?<br>intron2?<br>3'UTR?   | >-270<br>>216<br>>569<br>>2567                                                                           |                          |                       |
|                         | <i>Anopheles_epiroticus</i>      | <a href="#">Aepi\Atp6v1B</a>                               | ND         | 97     | 977  | 326                                    | 70 | 1074                      |                   |                       | ND       | tacctatctcaTCACATGAcagaatccgtaa<br>cgtgacgggagTCATGTGAcgtgcgtgaag<br>agtgttttgatTCACATGActgtcaaaacac                                      | 5'<br>intron2?<br>intron2?             | >-244<br>>221<br>>582                                                                                    |                          |                       |
|                         | <i>Anopheles_minimus</i>         | <a href="#">Amin\Atp6v1B</a>                               | ND         | 97     | 995  | 326                                    | 60 | 1074                      |                   |                       | ND       | ttcgtttctcaTCACATGAcagaatccattg<br>ttgtgagatgTCATGTGAcgtggaagtgat<br>actgttttgatTCACATGActgtcaaaacac                                      | 5'<br>intron2?<br>intron2?             | >-245<br>>218<br>>572                                                                                    |                          |                       |
|                         | <i>Anopheles_funestus</i>        | <a href="#">Afun\Atp6v1B</a>                               | ND         | 97     | 1007 | 326                                    | 69 | 1074                      |                   |                       | ND       | ttcgtttctcaTCACATGAcagaatccataa<br>gtgtgagatgTCATGTGAcgtggaagtgat<br>actgttttgatTCACATGActgtcaaaacac                                      | 5'<br>intron2?<br>intron2?             | >-238<br>>217<br>>582                                                                                    |                          |                       |
|                         | <i>Anopheles_stephensi</i>       | <a href="#">Aste\Atp6v1B</a>                               | ND         | 97     | 972  | 326                                    | 88 | 1074                      |                   |                       | ND       | ttcgtttctcaTCACATGAcagaattgctaa<br>ccgtgagatgTCATGTGAatggtatagt<br>actgttttgatTCACATGActgtcaaaacac                                        | 5'<br>intron2?<br>intron2?             | >-250<br>>219<br>>567                                                                                    |                          |                       |
|                         | <i>Anopheles_dirus</i>           | <a href="#">Adir\Atp6v1B</a>                               | ND         | 97     | 1016 | 326                                    | 67 | 1074                      |                   |                       | ND       | gcccggtgtacgTCATGTGAcgtgtgttgaa<br>actgttttgatTCACATGActgtcaaaacac                                                                        | intron1                                | >213<br>>556                                                                                             |                          |                       |
|                         | <i>Anopheles_nili</i>            | <a href="#">Anil\Atp6v1B</a>                               | ND         | 97     | 940  | 326                                    | 83 | 1074                      |                   |                       | ND       | cgtttctctcaTCACATGAcagttggcaaaa<br>aagatgtctcgTCATGTGAcgatgtgaagt<br>cctgttttgatTCACATGActgtcaaaacac                                      | 5'<br>intron2?<br>intron2?             | >-264<br>>192<br>>527                                                                                    |                          |                       |
|                         | <i>Anopheles_albimanus</i>       | <a href="#">Aalb\Atp6v1B</a>                               | ND         | 97     | 906  | 326                                    | 91 | 1074                      |                   |                       | ND       | ttcgttttgatTCACATGActgtttgtgtgc                                                                                                           | intron2?                               | >496                                                                                                     |                          |                       |
|                         | <i>Anopheles_darlingi</i>        | <a href="#">Adar\Atp6v1B</a>                               | ND         | 97     | 863  | 326                                    | 79 | 1074                      |                   |                       | ND       | ttcgttttgatTCACATGActgtttgtgtgc                                                                                                           | intron2?                               | >473                                                                                                     |                          |                       |
|                         | <i>Aedes_aegypti</i>             | <a href="#">Aaeg\Atp6v1B</a><br><a href="#">AAEL005798</a> | ND         | 91     | 4094 | 326                                    | 63 | 1074                      |                   |                       | ND       | ttcactgtttgtTCACATGAcaactaatgtt<br>agctcagaagtTCATGTGAaacttccaaa<br>aattgtaaaaTCATATGAaggaataagcctt<br>tctgttttgatTCACATGActgtcaaaacac    | 5'<br>intron1<br>intron1<br>intron1    | >-619<br>>198<br>>292<br>>572                                                                            |                          |                       |
|                         | <i>Culex_pipiens_qui.</i>        | <a href="#">Cqui\Atp6v1B</a><br><a href="#">CPI003418</a>  | ND         | 79     | ND   | 326                                    | 65 | 1074                      |                   |                       | ND       | actagcgagctgTCACATGAagggtgttgaa<br>ttttcgagatgTCATGTGAaactcttattt<br>tctgttttgatTCACATGAacacactgtcaa                                      | 5'<br>intron1<br>intron1               | >-322<br>>179<br>>531                                                                                    |                          |                       |
| Diptera (Cecidomyiidae) | <i>Mayetiola_destructor</i>      | <a href="#">Mdes\Atp6v1B</a>                               | ND         | 79     | 737  | 1133 (119+130+132+125+231+103+155+138) |    |                           | 92                | 129                   | 116      | 138                                                                                                                                       | ND                                     | taataccaaaagTCACATGAcagcacgtgagc<br>aacaatgacatgTCATGTGAacctaataatg<br>tgacttcaataaTCATATGAaaaaataagcaat | 5'<br>intron1<br>intron1 | >-177<br>>608<br>>644 |

|              |                                |                                                           |     |    |      |                   |      |     |     |     |               |                           |     |              |      |                  |               |     |      |     |      |      |               |     |     |                                                                                                                                                |                                                                                                                                               |                                                                 |                                     |                                 |                               |
|--------------|--------------------------------|-----------------------------------------------------------|-----|----|------|-------------------|------|-----|-----|-----|---------------|---------------------------|-----|--------------|------|------------------|---------------|-----|------|-----|------|------|---------------|-----|-----|------------------------------------------------------------------------------------------------------------------------------------------------|-----------------------------------------------------------------------------------------------------------------------------------------------|-----------------------------------------------------------------|-------------------------------------|---------------------------------|-------------------------------|
| Lepidoptera  | <i>Bombyx_mori</i>             | <a href="#">Bmor\Atp6v1B</a>                              | ND  | 85 | 1803 | 119               | 569  | 130 | 628 | 132 | 576           | 125                       | 490 | 231          | 1021 | 103              | 361           | 155 | 602  | 138 | 335  | 129  | 684           | 138 | ND  | ccttgatgggTCACGTGAacgacgtgaag<br>actgtgatcagTCACATGAatttgtagtc                                                                                 | 5'UTR?<br>intron1                                                                                                                             | >-110<br>>-338                                                  |                                     |                                 |                               |
|              | <i>Manduca sexta</i>           | <a href="#">Msex\Atp6v1B</a>                              | ND  | 85 | ND   | 119               | ND   | 130 | 108 | 132 | 152           | 125                       | 198 | 231          | 325  | 103              | 306           | 155 | 259  | 138 | 922? | 129  | 295           | 138 | ND  | ccttgatgggTCACGTGAacgacgtgaag<br>tatgtgttataTCACATGAatgaatttatct                                                                               | 5'UTR?<br>intron1                                                                                                                             | >-111<br>>-923                                                  |                                     |                                 |                               |
|              | <i>Danaus_plexippus</i>        | <a href="#">Dple\Atp6v1B</a>                              | ND  | 85 | 1033 | 119               | 229  | 130 | 788 | 132 | 648           | 125                       | 498 | 231          | 161  | 103              | 351           | 155 | 519  | 138 | 303  | 129  | 162           | 138 | ND  | tcttgatagaTCACGTGAacgacgtgaag<br>atttaacaataTCACATGAatcaattattta                                                                               | 5'UTR?<br>intron1                                                                                                                             | >-106<br>>-590                                                  |                                     |                                 |                               |
|              | <i>Heliconius_melpomene</i>    | <a href="#">Hmel\Atp6v1B</a>                              | ND  | 85 | 960  | 119               | 1102 | 130 | 371 | 132 | 319           | 125                       | 386 | 231 (86+145) | 278  | 103              | 597           | 155 | 371  | 138 | 381  | 129  | 379           | 138 | ND  | tcttgatagTCACGTGAacgacgtgaag<br>ttctattagaTCACATGAacttctcttctac                                                                                | 5'UTR?<br>intron1                                                                                                                             | >-107<br>>-665                                                  |                                     |                                 |                               |
|              | <i>Plutella_xylostella</i>     | <a href="#">Pxy\Atp6v1B</a>                               | ND  | 94 | 1790 | 119               | 1433 | 130 | 658 | 132 | 529           | 125                       | 287 | 86           | 359  | 145              | 328           | 103 | 3466 | 155 | 1259 | 138  | 562           | 129 | 475 | 138                                                                                                                                            | ND                                                                                                                                            | ccttgacgggTCACGTGAacgacgtgaag<br>atgctctgaatTCATATGActtagttatgc | 5'UTR?<br>intron1                   | >-102<br>>-1211                 |                               |
|              |                                |                                                           |     |    |      |                   |      |     |     |     |               |                           |     |              |      |                  |               |     |      |     |      |      |               |     |     |                                                                                                                                                |                                                                                                                                               |                                                                 |                                     |                                 |                               |
| Strepsiptera | <i>Mengenilla_moldrzyki</i>    | <a href="#">Mmol\Atp6v1B</a>                              | ND  | 73 | 69   | 381 (119+130+132) |      |     |     |     | 1152          | 752 (125+231+103+155+138) |     |              |      |                  |               |     |      |     |      | 2681 | 267 (129+138) |     |     | ND                                                                                                                                             | ND                                                                                                                                            |                                                                 |                                     |                                 |                               |
| Coleoptera   | <i>Tribolium_castaneum</i>     | <a href="#">Tcas\Atp6v1B</a><br><a href="#">LOC656208</a> | 23  | 91 | 300  | 288               |      |     |     | 51  | 506 (304+202) |                           |     |              |      | 2342             | 339 (196+143) |     |      |     |      | 49   | 267           |     |     | 572                                                                                                                                            | cataattcgccgTCACGTGAacgacgtgaat<br>acacaaacgggTCATATGAacaaaatttctc<br>clgttgggtgTCATGTGAacgaatctcatg                                          |                                                                 |                                     | 5'UTR?<br>intron1<br>intron1    | >-45<br>207<br>351            |
|              | <i>Dendroctonus_ponderosae</i> | <a href="#">Dpon\Atp6v1B</a>                              | 138 | 79 | 219  | 288               |      |     |     | 311 | 304           |                           |     | 61           | 202  |                  | 55            | 196 |      | 59  | 143  | 355  | 267           |     |     | 257                                                                                                                                            | attgatttagcaTCACATGAataacgtcattg<br>gtcagttgcgtgTCACATGAacaaaactgga<br>ggcaatccatgTCATGTGAactatccctatga                                       |                                                                 |                                     | 5'<br>5'UTR<br>intron1          | -13<br>6<br>371               |
| Hymenoptera  | <i>Apis_mellifera</i>          | <a href="#">Amel\Atp6v1B</a><br><a href="#">GB19171</a>   | 61  | 88 | 565  | 467               |      |     |     |     | 109           | 666                       |     |              |      |                  |               |     |      |     |      | 81   | 267           |     |     | 468                                                                                                                                            | acttagtataagCCACGTGAatcgacgtgccga<br>gattfaccatagTCAGCTGAatcgaaattgat<br>tagagacatccaTCATGTGAactgtagcagca                                     |                                                                 |                                     | 5'<br>intron1<br>intron1        | -267<br>266<br>421            |
|              | <i>Apis_florea</i>             | <a href="#">Aflo\Atp6v1B</a>                              | ND  | 82 | 590  | 467               |      |     |     |     | 125           | 666                       |     |              |      |                  |               |     |      |     |      | 86   | 267           |     |     | ND                                                                                                                                             | acttagtataaaCCACGTGAatcgacgtgccga<br>gattfaccatagTCAGCTGAatcgaaattgat<br>tagagacatctaTCATGTGAactgtagcagca                                     |                                                                 |                                     | 5'<br>intron1<br>intron1        | >-328<br>>199<br>>349         |
|              | <i>Bombus_terrestris</i>       | <a href="#">Bter\Atp6v1B</a>                              | ND  | 88 | 449  | 467               |      |     |     |     | 97            | 666                       |     |              |      |                  |               |     |      |     |      | 74   | 267           |     |     | ND                                                                                                                                             | acttagtataagCCACGTGAatcgacgtgccga<br>attggccagtagTCAGCTGAatcgaaattgat<br>tcgagatattgaTCATGTGAactatacatcaa                                     |                                                                 |                                     | 5'<br>intron1<br>intron1        | >-320<br>>193<br>>343         |
|              | <i>Bombus_impatiens</i>        | <a href="#">Bimp\Atp6v1B</a>                              | ND  | 88 | 449  | 467               |      |     |     |     | 103           | 666                       |     |              |      |                  |               |     |      |     |      | 74   | 267           |     |     | ND                                                                                                                                             | acttagtataagCCACGTGAatcgacgtgccga<br>attggccagtagTCAGCTGAatcgaaattgat<br>tcgagatattgaTCATGTGAactatacatgcaa                                    |                                                                 |                                     | 5'<br>intron1<br>intron1        | >-320<br>>193<br>>343         |
|              | <i>Megachile_rotundata</i>     | <a href="#">Mrot\Atp6v1B</a>                              | ND  | 88 | 553  | 467               |      |     |     |     | 64            | 666                       |     |              |      |                  |               |     |      |     |      | 75   | 267           |     |     | ND                                                                                                                                             | tcttagtacaagCCACGTGAatcgacgtgccga<br>attgcaactaaTCAGCTGAatcaaaaggtag<br>atgataaatctgTCATGTGAactgtagacagag                                     |                                                                 |                                     | 5'<br>intron1<br>intron1        | >-320<br>>191<br>>253         |
|              | <i>Acromyrmex_echinaior</i>    | <a href="#">Aech\Atp6v1B</a>                              | ND  | 88 | 865  | 467               |      |     |     |     | 180           | 666                       |     |              |      |                  |               |     |      |     |      | 152  | 267           |     |     | ND                                                                                                                                             | acttagtccgggCCACGTGAatcgacgtgacct<br>cccaactggagTCAGCTGAatctacttgaaa<br>gagctgccagcgTCATGTGAaccatgagtgaca                                     |                                                                 |                                     | 5'<br>intron1<br>intron1        | >-518<br>>187<br>>376         |
|              | <i>Atta_cephalotes</i>         | <a href="#">Acep\Atp6v1B</a>                              | ND  | 88 | 831  | 467               |      |     |     |     | 202           | 666                       |     |              |      |                  |               |     |      |     |      | 154  | 267           |     |     | ND                                                                                                                                             | acttagtccgagCCACGTGAatcgacgtgacct<br>ccgaactggagTCAGCTGAatcacttgaaaa<br>ctcgagccagcaTCATGTGAatcagtagcaact                                     |                                                                 |                                     | 5'<br>intron1<br>intron1        | >-390<br>>184<br>>365         |
|              | <i>Solenopsis_invicta</i>      | <a href="#">Sinv\Atp6v1B</a>                              | ND  | 88 | 1438 | 467               |      |     |     |     | 133           | 666                       |     |              |      |                  |               |     |      |     |      | 149  | 267           |     |     | ND                                                                                                                                             | cacgtgttccggCCACGTGAatcgacgtgacct<br>gattccctcgggTCAGCTGAatcactcagtaga<br>ctgctcgagcgTCATGTGAactggagcagaca                                    |                                                                 |                                     | 5'<br>intron1<br>intron1        | >-353<br>>192<br>>371         |
|              | <i>Camponotus_floridanus</i>   | <a href="#">Cflo\Atp6v1B</a>                              | ND  | 88 | 978  | 467               |      |     |     |     | 130           | 666                       |     |              |      |                  |               |     |      |     |      | 135  | 267           |     |     | ND                                                                                                                                             | acgtagtccaagCCACGTGAatcgacgtgacct<br>ccccgaactgaTCAGCTGAatccccgaatttc<br>agaccgagcttgTCATGTGAactcgagcagaca                                    |                                                                 |                                     | 5'<br>intron1<br>intron1        | >-363<br>>82<br>>338          |
|              | <i>Harpegnathos_saltator</i>   | <a href="#">Hsal\Atp6v1B</a>                              | ND  | 88 | 925  | 467               |      |     |     |     | 314           | 666                       |     |              |      |                  |               |     |      |     |      | 244  | 267           |     |     | ND                                                                                                                                             | acctagtccgagCCACGTGAatcgacgtgacct<br>tctcaattgggTCAGCTGAatccccgaatttc<br>gagctcgccgggTCATGTGAactaggaacgatt                                    |                                                                 |                                     | 5'<br>intron1<br>intron1        | >-401<br>>182<br>>343         |
|              | <i>Pogonomyrmex_barbatus</i>   | <a href="#">Pbar\Atp6v1B</a>                              | ND  | 88 | 946  | 467               |      |     |     |     | 108           | 666                       |     |              |      |                  |               |     |      |     |      | 146  | 267           |     |     | ND                                                                                                                                             | acctagtccgagCCACGTGAatcgacgtgacct<br>cgacgcagggggTCAGCTGAatccaattgaaa<br>gagccgcagcaTCATGTGAactcggaacgact                                     |                                                                 |                                     | 5'<br>intron1<br>intron1        | >-398<br>>191<br>>359         |
|              | <i>Linepithema_humile</i>      | <a href="#">Lhum\Atp6v1B</a>                              | ND  | 88 | ND   | 467               |      |     |     |     | 115           | 666 (327+339)             |     |              |      |                  |               |     |      |     |      | 130  | 267           |     |     | ND                                                                                                                                             | acttagtccgagCCACGTGAatcgacgtgacct<br>ccaccaaatgggTCAGCTGAatccccgaatttc<br>gagctgccagcgTCATGTGAactcgagcagacg<br>gaaatgaataTCACATGAattagttagtag |                                                                 |                                     | 5'<br>intron1<br>intron1        | >-369<br>>170<br>>332<br>>579 |
|              | <i>Nasonia_vitripennis</i>     | <a href="#">Nvit\Atp6v1B</a>                              | ND  | 88 | 1138 | 467               |      |     |     |     | 75            | 327                       |     |              | 79   | 339              |               |     |      |     | 110  | 267  |               |     | ND  | catcagcccgagCCACGTGAatcccaactgctt<br>cccccaactggTCAGCTGAatcgccgttgcgc<br>gtaggtctgtgTCATGTGAactcgagcagacg<br>cactctggggagTCATGTGAacacgtgcgctt  |                                                                                                                                               |                                                                 | 5'<br>intron1<br>intron1<br>intron1 | >-417<br>>-379<br>>-543<br>>722 |                               |
|              | <i>Nasonia_giraulti</i>        | <a href="#">Ngir\Atp6v1B</a>                              | ND  | 88 | ND   | 467               |      |     |     |     | 74            | 327                       |     |              | 78   | 339              |               |     |      |     | 110  | 267  |               |     | ND  | catcagcccgagCCACGTGAatcccaactgctt<br>tccctcagctggTCAGCTGAatcgccgttgcgc<br>gtaggtctgtgTCATGTGAactcgagcagacg<br>cactctggggagTCATGTGAacacgtgcgctt |                                                                                                                                               |                                                                 | 5'<br>intron1<br>intron1<br>intron1 | >-426<br>>-381<br>>-546<br>>723 |                               |
|              | <i>Nasonia_longicornis</i>     | <a href="#">Nlon\Atp6v1B</a>                              | ND  | 88 | 1172 | 467 (155+312)     |      |     |     |     | ND            | 327 (102+98+124)          |     |              | 78   | 339 (151+83+105) |               |     |      |     | 110  | 267  |               |     | ND  | catcagcccgagCCACGTGAatcccaactgctt<br>tccctcagctggTCAGCTGAatcgccgttgcgc<br>gtaggtctgtgTCATGTGAactcgagcagacg<br>cactctggggagTCATGTGAacacgtgcgctt |                                                                                                                                               |                                                                 | 5'<br>intron1<br>intron1<br>intron1 | >-420<br>>-378<br>>-542<br>>719 |                               |

|              |                               |                              |     |     |      |            |       |               |      |               |     |                      |     |             |              |     |              |      |      |                  |      |                                  |                                                                                                      |      |                                 |     |           |                      |                                  |      |         |      |                                 |                                 |                                |       |         |      |
|--------------|-------------------------------|------------------------------|-----|-----|------|------------|-------|---------------|------|---------------|-----|----------------------|-----|-------------|--------------|-----|--------------|------|------|------------------|------|----------------------------------|------------------------------------------------------------------------------------------------------|------|---------------------------------|-----|-----------|----------------------|----------------------------------|------|---------|------|---------------------------------|---------------------------------|--------------------------------|-------|---------|------|
|              |                               |                              |     |     |      |            |       |               |      |               |     |                      |     |             |              |     |              |      |      |                  |      |                                  |                                                                                                      |      |                                 |     |           |                      |                                  |      |         |      |                                 |                                 |                                |       |         |      |
| Hemiptera    | <i>Acyrtosiphon_pisum</i>     | <a href="#">LOC100572714</a> |     | 88  | 603  | 155        | 70    | 312 (172+140) |      |               |     | 72                   | 147 | 521         | 331          |     | 69           | 188  | 74   | 130              | 71   | 140                              |                                                                                                      | ND   |                                 |     |           |                      |                                  |      |         |      |                                 |                                 |                                |       |         |      |
|              | <i>Rhodnius_prolixus</i>      | <a href="#">Rpro\Atp6v1B</a> |     | 79  | 205  | 155        | 73    | 172           | 1383 | 140           | 118 | 147                  | 846 | 331         |              | 861 | 188          | 3191 | 130  | 87               | 149  |                                  | ND                                                                                                   |      |                                 |     |           |                      |                                  |      |         |      |                                 |                                 |                                |       |         |      |
| Phthiraptera | <i>Pediculus_humanus</i>      | <a href="#">PHUM253140</a>   |     | 79  | 415  | 155        | 135   | 172           | 103  | 287 (140+147) |     |                      |     | 81          | 414 (331+83) |     |              |      | 83   | 235 (105+130)    |      | 91                               | 149                                                                                                  |      | tacgttgcttgTCATGTGAatTCACGTGAtc |     |           |                      | 5'UTR?                           | >.32 |         |      |                                 |                                 |                                |       |         |      |
| Odonata      | <i>Ladona_fulva</i>           | <a href="#">Lful\Atp6v1B</a> |     | 88  | 323  | 155        | 101   | 172           | 1065 | 140           | 82  | 147                  | 156 | 180+191+151 |              | 89  | 188          | 264  | 130  | 127              | 149  |                                  | tcgagtacgtgTCACGTGAaTCACGTGAatgacatcgaaaattttatticaTCATGTGAatccaccacca tgaatttaggTCACATGAagttagatcca |      |                                 |     | 5' intron | >.23/-13 >1569 >3413 |                                  |      |         |      |                                 |                                 |                                |       |         |      |
| Crustacea    | <i>Daphnia_pulex</i>          | <a href="#">Dpu\Atp6v1B</a>  |     | 94  | 86   | 155(56+99) | 57    | 172           | 64   | 140           | 67  | 478( 105+98+124+151) |     |             |              | 78  | 188 (83+105) | 63   | 273  |                  |      | gtgactgcacgTCATATGAatcgagagaaccc |                                                                                                      |      |                                 | 5'  | >-138     |                      |                                  |      |         |      |                                 |                                 |                                |       |         |      |
| Ixodida      | <i>Ixodes_scapularis</i>      | <a href="#">ISCW022132</a>   | 99  | 85  | 1630 | 56         | 944   | 99            | 80   | 94            | 57  | 78                   | 67  | 140         | 74           | 105 | 820          | 98   | 903  | 358 (124+151+83) |      | 2083                             | 105                                                                                                  | 93   | 130                             | ND  | 155       |                      | tgggtgtagcggTCATGTGAatcaggatgtca |      | intron1 | 547  |                                 |                                 |                                |       |         |      |
|              |                               |                              |     |     |      |            |       |               |      |               |     |                      |     |             |              |     |              |      |      |                  |      |                                  |                                                                                                      |      |                                 |     |           |                      |                                  |      |         |      |                                 |                                 |                                |       |         |      |
|              | <i>Homo_sapiens</i>           | <a href="#">ATP6V1B1</a>     | 87  | 118 | 7585 | 56         | 14332 | 99            | 188  | 94            | 591 | 78                   | 843 | 140         | 842          | 102 | 573          | 98   | 1083 | 124              | 261  | 151                              |                                                                                                      | 259  | 83                              | 783 | 105       | 193                  | 130                              | 92   | 164     | 310  | atctccagctcTCAGGTGAacggggcccctc |                                 | 5'                             | >-149 |         |      |
|              |                               | <a href="#">ATP6V1B2</a>     | 214 | 135 | 6941 | 56         | 4893  | 99            | 814  | 94            | 129 | 78                   | 530 | 140(82+58)  | 335          | 102 | 348          | 98   | 582  | 124              | 1912 | 151                              |                                                                                                      | 1444 | 83                              | 724 | 105       | 828                  | 130                              | 1980 | 140     | 1294 | tcgaatggataTCAGCTGAacgttgccctga |                                 | 5'                             | >-121 |         |      |
| Cnidaria     | <i>Nematostella_vectensis</i> | <a href="#">Nvec\Atp6v1B</a> | ND  | 79  | 152  | 56         | 394   | 99            | 295  | 94            | 174 | 78                   | 405 | 82          | 87           | 58  | 96           | 102  | 152  | 98               | 115  | 124                              | 199                                                                                                  | 81   | 447                             | 70  | 180       | 83                   | 334                              | 105  | 577     | 130  | 329                             | 137                             | ccgttcagggtTCACGTGAatctcttgtag |       | intron1 | >171 |
| Placozoa     | <i>Trichoplax_adhaerens</i>   | <a href="#">Tadh\Atp6v1B</a> | ND  | 73  | 213  | 56         | 740   | 99            | 344  | 94            | 101 | 160 (78+82)          |     | 73          | 58           | 85  | 102          | 158  | 98   | 99               | 124  | 72                               | 81                                                                                                   | 70   | 70                              | 110 | 83        | 79                   | 105                              | 118  | 130     | 92   | 149                             | cttgaatgactTCACATGAacatcgctatac |                                | 5'    | >-290   |      |
|              |                               |                              |     |     |      |            |       |               |      |               |     |                      |     |             |              |     |              |      |      |                  |      |                                  |                                                                                                      |      |                                 |     |           |                      |                                  |      |         |      |                                 |                                 |                                |       |         |      |
|              |                               |                              |     |     |      |            |       |               |      |               |     |                      |     |             |              |     |              |      |      |                  |      |                                  |                                                                                                      |      |                                 |     |           |                      |                                  |      |         |      |                                 |                                 |                                |       |         |      |
