# Supplementary material for: Structural and Comparative Analyses of Insects Suggest the Presence of an Ultra-Conserved Regulatory Element of the Genes Encoding Vacuolar-Type ATPase Subunits and Assembly Factors
Source: MDPI journal article supplement (doi:10.3390/biology12081127), 2023-08-13
Supplement: s1 [file s1]

| Gene Cluster ID                                        |                                |                             | Vma21                                                                |     |        |      |        |        |                                  |                                 |              |     |
|--------------------------------------------------------|--------------------------------|-----------------------------|----------------------------------------------------------------------|-----|--------|------|--------|--------|----------------------------------|---------------------------------|--------------|-----|
| Drosophila melanogaster gene                           |                                |                             | CG5969                                                               |     |        |      |        |        |                                  |                                 |              |     |
| FlyBase ID                                             |                                |                             | <a href="#">FBgn0036998</a>                                          |     |        |      |        |        |                                  |                                 |              |     |
| Predicted function                                     |                                |                             | Vacuolar ATPase assembly integral membrane protein VMA21-like domain |     |        |      |        |        |                                  |                                 |              |     |
| Vma21 gene structure comparison:                       |                                |                             |                                                                      |     |        |      |        |        |                                  |                                 |              |     |
| Key: <span>UTR region</span> , <span>CDS region</span> |                                |                             |                                                                      |     |        |      |        |        |                                  |                                 |              |     |
| Order                                                  | Species                        | Vma21 orthologs             | 5'exon                                                               |     | intron | exon | intron | exon3' | Extended CLEAR region            | Position                        | bps from TSS |     |
| Diptera (Drosophilidae)                                | <i>Drosophila_melanogaster</i> | <a href="#">Dmel\CG5969</a> | 101                                                                  | 72  | 62     | 246  |        | 517    | actaccacittaTCATGTGAtttgtgattgt  | 5'                              | -11          |     |
| Diptera (Muscidae)                                     | <i>Musca_domestica</i>         | <a href="#">Mdom\Vma21</a>  |                                                                      | 78  | 69     | 240  |        |        | ctgtataactaaTCATGTGAcgttgattggac | 5'                              | >-120        |     |
| Diptera ( Tephritidae)                                 | <i>Ceratitis_capitata</i>      | <a href="#">Ccap\Vma21</a>  | 96                                                                   | 51  | 60     | 255  |        | 298    | ggtgaaatgcaTCACGTGAcgtttcttcat   | 5'                              | -31          |     |
| Diptera (Glossinidae)                                  | <i>Glossina_morsitans</i>      | <a href="#">Gmor\Vma21</a>  |                                                                      | 318 |        |      |        |        | ND                               |                                 |              |     |
| Diptera (Psychodidae)                                  | <i>Phlebotomus_papatasi</i>    | <a href="#">Ppap\Vma21</a>  | 115                                                                  | 27  | 94     | 270  |        | 423    | aatagagaaaagTCACATGAcgccgaattgag | intron1                         | 172          |     |
| Diptera (Culicidae)                                    | <i>Anopheles_stephensi</i>     | <a href="#">Aste\Vma21</a>  |                                                                      | 42  | 110    | 285  |        |        | ND                               |                                 |              |     |
|                                                        | <i>Anopheles_gambiae</i>       | <a href="#">AGAP01354</a>   | 55                                                                   | 42  | 81     | 273  |        | 369    | ND                               |                                 |              |     |
|                                                        | <i>Anopheles_darlingi</i>      | <a href="#">Adar\Vma21</a>  |                                                                      | 42  | 64     | 279  |        |        | ND                               |                                 |              |     |
|                                                        | <i>Aedes_aegypti</i>           | <a href="#">AAEL011546</a>  |                                                                      | 42  | 142    | 279  |        |        | atcgctcattggTCAGCTGAttccctcagaa  | 5'                              |              |     |
|                                                        |                                | <a href="#">AAEL013448</a>  |                                                                      | 42  | 142    | 279  |        |        | atcgctcattggTCAGCTGAttccctcagaa  | 5'                              |              |     |
|                                                        | <i>Culex_pipiens_qui.</i>      | <a href="#">CPII002927</a>  |                                                                      | 39  | 136    | 264  |        |        | ND                               |                                 |              |     |
| Diptera (Cecidomyiidae)                                | <i>Mayetiola_destructor</i>    | <a href="#">Mdes\Vma21</a>  |                                                                      | ND  | ND     | 282  |        |        | gtaattgtttaTCATGTGAttgtgtacact   | 5'                              | ND           |     |
| Lepidoptera                                            | <i>Bombyx_mori</i>             | <a href="#">Bmor\Vma21</a>  | 76                                                                   | 21  | 87     | 249  |        | 192    | ataggatgtgTCATATGAatcatcattt     | 5'                              | 1012         |     |
|                                                        | <i>Danaus_plexippus</i>        | <a href="#">Dple\Vma21</a>  |                                                                      | 21  | 88     | 252  |        |        | ND                               |                                 |              |     |
|                                                        | <i>Heliconius_melpomene</i>    | <a href="#">Hmel\Vma21</a>  |                                                                      | 21  | 86     | 252  |        |        | ND                               |                                 |              |     |
|                                                        | <i>Manduca sexta</i>           | <a href="#">Msex\Vma21</a>  |                                                                      | 21  | 80     | 249  |        |        | acattcatcatTCATGTGAtcgatcattgat  | 5'                              | -86          |     |
|                                                        |                                |                             |                                                                      |     |        |      |        |        |                                  |                                 |              |     |
| Coleoptera                                             | <i>Dendroctonus_ponderosae</i> | <a href="#">Dpon\Vma21</a>  | 64                                                                   | 109 |        |      | 55     | 149    | 244                              | aaagtggactagTCATGTGAttcagtccaat | 3'UTR        | 378 |
|                                                        | <i>Tribolium_castaneum</i>     | <a href="#">Tcas\Vma21</a>  |                                                                      |     |        |      |        |        |                                  | NA                              |              |     |
|                                                        |                                |                             |                                                                      |     |        |      |        |        |                                  |                                 |              |     |
| Hymenoptera                                            | <i>Apis_mellifera</i>          | <a href="#">GB11041</a>     | 396                                                                  | 15  | 90     | 106  | 528    | 140    | 1688                             | ND                              |              |     |
|                                                        | <i>Apis_florea</i>             | <a href="#">Aflo\Vma21</a>  |                                                                      | 15  | 112    | 106* | 729    | 140    |                                  | ND                              |              |     |
|                                                        | <i>Bombus_terrestris</i>       | <a href="#">Bter\Vma21</a>  | 631                                                                  | 15  | 90     | 106  | 401    | 140    |                                  | ND                              |              |     |
|                                                        | <i>Bombus_impatiens</i>        | <a href="#">Bimp\Vma21</a>  |                                                                      | 15  | 90     | 106  | 648    | 140    |                                  | ND                              |              |     |
|                                                        | <i>Megachile_rotundata</i>     | <a href="#">Mrot\Vma21</a>  |                                                                      | 15  | 97     | 106  | 402    | 140    |                                  | ND                              |              |     |
|                                                        | <i>Acromyrmex_echinator</i>    | <a href="#">Aech\Vma21</a>  |                                                                      | 15  | 92     | 106  | 173    | 143    |                                  | ND                              |              |     |
|                                                        | <i>Atta_cephalotes</i>         | <a href="#">Acep\Vma21</a>  |                                                                      | 15  | 98     | 106  | ND     | 143    |                                  | ND                              |              |     |
|                                                        |                                |                             |                                                                      |     |        |      |        |        |                                  |                                 |              |     |

|              |                               |                            |             |    |      |          |      |     |      |                                  |    |      |
|--------------|-------------------------------|----------------------------|-------------|----|------|----------|------|-----|------|----------------------------------|----|------|
|              | <i>Solenopsis_invicta</i>     | <a href="#">Sinv\Vma21</a> | 127         | 18 | 108  | 106      | 142  | 143 | 284  | ND                               |    |      |
|              | <i>Pogonomyrmex_barbatus</i>  | <a href="#">Pbar\Vma21</a> |             | 15 | 110  | 106      | 197  | 143 |      | ND                               |    |      |
|              | <i>Linepithema_humile</i>     | <a href="#">Lhum\Vma21</a> |             | 15 | 108  | 106      | 129  | 143 |      | ND                               |    |      |
|              | <i>Harpegnathos_saltator</i>  | <a href="#">Hsal\Vma21</a> |             | 15 | 99   | 106      | 160  | 140 |      | ND                               |    |      |
|              | <i>Camponotus_floridanus</i>  | <a href="#">Cflo\Vma21</a> |             | 15 | 99   | 106      | 171  | 143 |      | ND                               |    |      |
|              | <i>Nasonia_giraulti</i>       | <a href="#">Ngir\Vma21</a> |             | 15 | 166  | 106      | 83   | 140 |      | ND                               |    |      |
|              | <i>Nasonia_longicornis</i>    | <a href="#">Nlon\Vma21</a> |             | 15 | 166  | 106      | 83   | 140 |      | ND                               |    |      |
|              | <i>Nasonia_vitripennis</i>    | <a href="#">NV14065</a>    | 399         | 15 | 166  | 106      | 83   | 140 | 951  | ND                               |    |      |
|              |                               |                            |             |    |      |          |      |     |      |                                  |    |      |
| Hemiptera    | <i>Acyrtosiphon_pisum</i>     | <a href="#">Apis\Vma21</a> |             |    |      |          |      |     |      | NA                               |    |      |
|              | <i>Rhodnius_prolixus</i>      | <a href="#">Rpro\Vma21</a> |             |    |      |          |      |     |      | NA                               |    |      |
| Phthiraptera | <i>Pediculus_humanus</i>      | <a href="#">Phum\Vma21</a> |             |    |      |          |      |     |      | NA                               |    |      |
|              | <i>Ladona_Fulva</i>           | <a href="#">Lful\Vma21</a> |             |    |      |          |      |     |      | NA                               |    |      |
| Crustacea    | <i>Daphnia_pulex</i>          | <a href="#">Dpu\Vma21</a>  | 30          | 36 | 80   | 39+64+73 | 56   | 137 | 49   | actgtcgaccACACGTGacaacgccgtc     | 5' | 24   |
| Ixodida      | <i>Ixodes_scapularis</i>      | <a href="#">Isca\Vma21</a> | 161+2927+14 |    |      | 264      |      |     | 305  |                                  |    |      |
|              |                               |                            |             |    |      |          |      |     |      |                                  |    |      |
|              | <i>Homo_sapiens</i>           | <a href="#">VMA21</a>      | 124         | 53 | 6269 | 110      | 1175 | 143 | 4306 | caccgccgtaagTCATGTGAgcgcgccccccc | 5' | 114  |
| Cnidaria     | <i>Nematostella_vectensis</i> | <a href="#">Nvec\Vma21</a> | 112         | 38 | 102  | 104      | 1627 | 134 | 131  | ctgaagtaTCACACGAgcggatcgcaa      | 5' | 214  |
| Placozoa     | <i>Trichoplax_adhaerens</i>   | <a href="#">Tadh\Vma21</a> |             | ND | ND   | 104      | 459  | 131 |      | gttgaaagtaTCATACGAtcaattaaag     | 5' | 1228 |
