# Supplementary material for: Structural and Comparative Analyses of Insects Suggest the Presence of an Ultra-Conserved Regulatory Element of the Genes Encoding Vacuolar-Type ATPase Subunits and Assembly Factors
Source: MDPI journal article supplement (doi:10.3390/biology12081127), 2023-08-13
Supplement: s1 [file s1]

|                                     |                                                                          |
|-------------------------------------|--------------------------------------------------------------------------|
| Gene Cluster ID                     | Atp6v1G                                                                  |
| <b>Drosophila melanogaster gene</b> | <b>Vha13 (CG6213)</b>                                                    |
| FlyBase ID                          | <a href="#">FBgn0026753</a>                                              |
| <b>Predicted function</b>           | <b>ATPase, H<sup>+</sup> transporting, lysosomal 13kDa, V1 subunit G</b> |
| Cytogenetic map                     | 3R:92A11-92A11                                                           |
| Gene sequence location              | <a href="#">3R:15468980..15470126</a> [-]                                |
| <b>Dmel CLEAR sequence</b>          | <b>TCATATGA; TCACATGA</b>                                                |
| CLEAR sequence location(s)          | 3R:15470110..15470117; 3R:15469803..15469810                             |

# FlyBase Vha13 (CG6213) gene model & CLEAR element (red) positions:

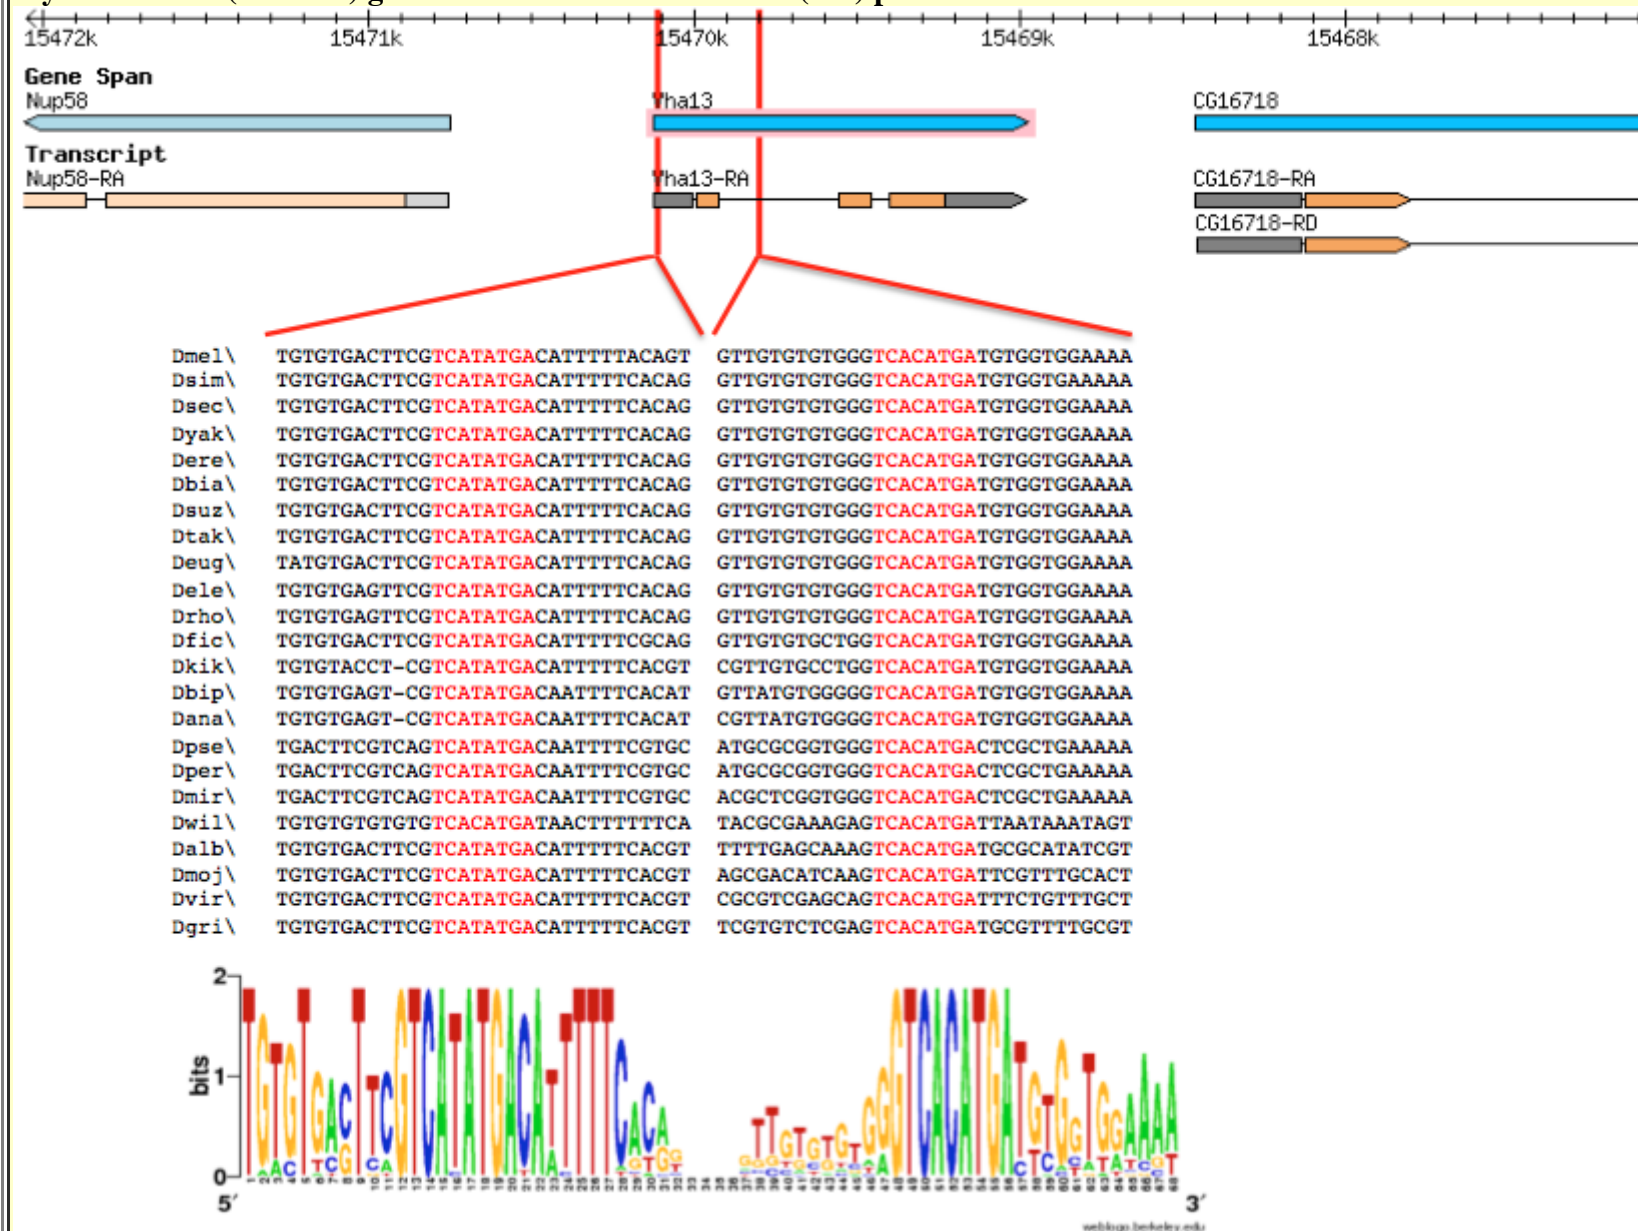

## Atp6v1G (Vha13) gene structure comparison:

Key: UTR region, CDS region

| Species                         | Vha13<br>Atp6v1G<br>orthologs | 5'exon |    | intron | exon | intron | exon3' |     | Extended CLEAR region                                               | Position          | bps<br>from<br>TSS |
|---------------------------------|-------------------------------|--------|----|--------|------|--------|--------|-----|---------------------------------------------------------------------|-------------------|--------------------|
| <i>Drosophila_melanogaster</i>  | <a href="#">Dmel\Vha13</a>    | 117    | 82 | 367    | 101  | 59     | 171    | 250 | tgtgtgacttcgTCATATGAcatttttcacag<br>gttgtgtgtgggTCACATGAtgtgttgaaaa | 5'UTR<br>intron1  | 9<br>317           |
| <i>Drosophila_simulans</i>      | <a href="#">Dsim\GD20107</a>  |        | 82 | 350    | 101  | 59     | 171    |     | tgtgtgacttcgTCATATGAcatttttcacag<br>gttgtgtgtgggTCACATGAtgtgttgaaaa | 5'UTR?<br>intron1 |                    |
| <i>Drosophila_sechellia</i>     | <a href="#">Dsec\GM26899</a>  |        | 82 | 349    | 101  | 59     | 171    |     | tgtgtgacttcgTCATATGAcatttttcacag<br>gttgtgtgtgggTCACATGAtgtgttgaaaa | 5'UTR?<br>intron1 |                    |
| <i>Drosophila_yakuba</i>        | <a href="#">Dyak\Vha13</a>    |        | 82 | 363    | 101  | 65     | 171    |     | tgtgtgacttcgTCATATGAcatttttcacag<br>gttgtgtgtgggTCACATGAtgtgttgaaaa | 5'UTR?<br>intron1 |                    |
| <i>Drosophila_erecta</i>        | <a href="#">Dere\GG15897</a>  |        | 82 | 367    | 101  | 64     | 171    |     | tgtgtgacttcgTCATATGAcatttttcacag<br>gttgtgtgtgggTCACATGAtgtgttgaaaa | 5'UTR?<br>intron1 |                    |
| <i>Drosophila_biarmipes</i>     | <a href="#">Dbia\Vha13</a>    |        | 82 | 362    | 101  | 65     | 171    |     | tgtgtgacttcgTCATATGAcatttttcacag<br>gttgtgtgtgggTCACATGAtgtgttgaaaa | 5'UTR?<br>intron1 |                    |
| <i>Drosophila_suzukii</i>       | <a href="#">Dsuz\Vha13</a>    |        | 82 | 358    | 101  | 66     | 171    |     | tgtgtgacttcgTCATATGAcatttttcacag<br>gttgtgtgtgggTCACATGAtgtgttgaaaa | 5'UTR?<br>intron1 |                    |
| <i>Drosophila_takahashii</i>    | <a href="#">Dtak\Vha13</a>    |        | 82 | 360    | 101  | 57     | 171    |     | tgtgtgacttcgTCATATGAcatttttcacag<br>gttgtgtgtgggTCACATGAtgtgttgaaaa | 5'UTR?<br>intron1 |                    |
| <i>Drosophila_eugracilis</i>    | <a href="#">Deug\Vha13</a>    |        | 82 | 362    | 101  | 64     | 171    |     | tatgtgacttcgTCATATGAcatttttcacag<br>gttgtgtgtgggTCACATGAtgtgttgaaaa | 5'UTR?<br>intron1 |                    |
| <i>Drosophila_elegans</i>       | <a href="#">Dele\Vha13</a>    |        | 82 | 191    | 101  | 71     | 171    |     | tgtgtgagttcgTCATATGAcatttttcacag<br>gttgtgtgtgggTCACATGAtgtgttgaaaa | 5'UTR?<br>intron1 |                    |
| <i>Drosophila_rhopaloea</i>     | <a href="#">Drho\Vha13</a>    |        | 82 | 193    | 101  | 57     | 171    |     | tgtgtgagttcgTCATATGAcatttttcacag<br>gttgtgtgtgggTCACATGAtgtgttgaaaa | 5'UTR?<br>intron1 |                    |
| <i>Drosophila_ficusphila</i>    | <a href="#">Dfic\Vha13</a>    |        | 82 | 178    | 101  | 73     | 171    |     | tgtgtgacttcgTCATATGAcatttttcgacg<br>gttgtgtgctggTCACATGAtgtgttgaaaa | 5'UTR?<br>intron1 |                    |
| <i>Drosophila_kikkawai</i>      | <a href="#">Dkik\Vha13</a>    |        | 82 | 191    | 101  | 65     | 171    |     | gtgtgtacctcgTCATATGAcatttttcacgt<br>cgttgtgcctggTCACATGAtgtgttgaaaa | 5'UTR?<br>intron1 |                    |
| <i>Drosophila_bipectinata</i>   | <a href="#">Dbip\Vha13</a>    |        | 82 | 190    | 101  | 256    | 171    |     | ctgtgtgagtcgTCATATGAcaattttcacat<br>gttatgtgggggTCACATGAtgtgttgaaaa | 5'UTR?<br>intron1 |                    |
| <i>Drosophila_ananassae</i>     | <a href="#">Dana\GF17364</a>  |        | 82 | 189    | 101  | 180    | 171    |     | ctgtgtgagtcgTCATATGAcaattttcacat<br>cgttatgtggggTCACATGAtgtgttgaaaa | 5'UTR?<br>intron1 |                    |
| <i>Drosophila_pseudoobscura</i> | <a href="#">Dpse\GA19444</a>  |        | 82 | 219    | 101  | 68     | 171    |     | tgacttcgtcagTCATATGAcaattttcgtgc<br>atgcgcggtgggTCACATGActcgtgaaaa  | 5'UTR?<br>intron1 |                    |
| <i>Drosophila_persimilis</i>    | <a href="#">Dper\GL11956</a>  |        | 82 | 219    | 101  | 67     | 171    |     | tgacttcgtcagTCATATGAcaattttcgtgc<br>atgcgcggtgggTCACATGActcgtgaaaa  | 5'UTR?<br>intron1 |                    |
| <i>Drosophila_miranda</i>       | <a href="#">Dmir\Vha13</a>    |        | 82 | 222    | 101  | 68     | 171    |     | tgacttcgtcagTCATATGAcaattttcgtgc<br>acgctcggtgggTCACATGActcgtgaaaa  | 5'UTR?<br>intron1 |                    |
| <i>Drosophila_willistoni</i>    | <a href="#">Dwil\GK22514</a>  |        | 82 | 224    | 101  | 65     | 171    |     | tgtgtgtgtgtgTCACATGAaactttttca<br>tacgcgaagagTCACATGAttaataaatagt   | 5'UTR?<br>intron1 |                    |
