# Supplementary material for: Structural and Comparative Analyses of Insects Suggest the Presence of an Ultra-Conserved Regulatory Element of the Genes Encoding Vacuolar-Type ATPase Subunits and Assembly Factors
Source: MDPI journal article supplement (doi:10.3390/biology12081127), 2023-08-13
Supplement: s1 [file s1]

| Gene Cluster ID                     |                                                            | Atp6v1E                                                    |                                                           |                                                   |  |
|-------------------------------------|------------------------------------------------------------|------------------------------------------------------------|-----------------------------------------------------------|---------------------------------------------------|--|
| Drosophila melanogaster gene        |                                                            | Vha26 (CG1088)                                             |                                                           |                                                   |  |
| FlyBase ID                          |                                                            | <a href="#">FBgn0015324</a>                                |                                                           |                                                   |  |
| Predicted function                  |                                                            | ATPase, H+ transporting, V1 subunit E                      |                                                           |                                                   |  |
| Atp6v1E CLEAR element conservation: |                                                            |                                                            |                                                           |                                                   |  |
|                                     | 5' / 5' UTR                                                | intron1                                                    | intron1                                                   | intron1                                           |  |
| Dmel\                               | ACTTT <b>CGTG</b> AAAT <b>TCATATGA</b> TCGATT <b>GCAGT</b> | GGA <b>TCTCCC</b> AGG <b>TCATGTGA</b> ACTTTTCA <b>CCGC</b> | <b>AATTCGTGCTGGT</b> <b>TCATGTGA</b> CACGGCCCC <b>CGC</b> | CATG <b>TCCAGTTA</b> <b>TCATGTGA</b> CACACAGGCAAC |  |
| Mdom\                               | AAAATTTCCCTT <b>TCACATGA</b> TGGGATATTTAC                  | TCATGGGATATG <b>TCATGTGA</b> ATATTTGTTGTC                  | CATTAACAGAAG <b>TCATGTGA</b> TCAAAATGTAGG                 |                                                   |  |
| Ccap\                               | AAATTTCCCCA <b>ATCATATGA</b> TAAAAAAAAAAG                  | TCATGGGATGTG <b>TCATGTGA</b> ATACGAAGTGTA                  | CAATGGGGCTTG <b>TCATGTGA</b> CCAACCGAACGT                 | GCTTACAAC <b>TAA</b> <b>TCATGTGA</b> TTAAAGTTTGA  |  |
| Gmor\                               | <b>TAA</b> CCCTGTT <b>ATCATATGA</b> CCAA <b>GAGAAAA</b>    | AGAT <b>TCGAGTAGTCATGTGA</b> TCAT <b>TTGGTTGAA</b>         |                                                           |                                                   |  |
| Llon\                               | <b>TACA</b> ACTCCA <b>ATTCATATGA</b> CTGACTTTGGTC          | <b>TTTTCC</b> TTGAAG <b>TCATGTGA</b> CT <b>CTTCGCCATG</b>  |                                                           |                                                   |  |
| Ppap\                               | <b>TAA</b> ATACACGA <b>ATTCATATGA</b> TCAC <b>TTGGACA</b>  | <b>TTTTCC</b> TCCAAG <b>TCATGTGA</b> CT-- <b>TCGCCATG</b>  |                                                           |                                                   |  |
|                                     |                                                            |                                                            |                                                           |                                                   |  |
| Agam\                               | -----                                                      | CGGGTCACGGGACCT--GTCATGTGAAAAGTG                           | <b>ATGCAATATGTGTCACATGACCGACTCTCCCC</b>                   | TACT <b>GGT</b> AGTCATATGACGG <b>GCTTACAAG</b>    |  |
| Aara\                               | -----                                                      | CGGGTCACGGGACCT--GTCATGTGAAAAGTG                           | <b>ATGCAATATGTGTCACATGACCGACTCTCCCC</b>                   | TACT <b>GGG</b> AGTCATATGACGG <b>GCTTACATG</b>    |  |
| Aqan\                               | -----                                                      | CGGGTCACGGGACCT--GTCATGTGAAAAGTG                           | <b>ATGCAATATGTGTCACATGACCGACTCTCCCC</b>                   | TACT <b>GGT</b> AGTCATATGACGG <b>GCTTACATG</b>    |  |
| Achr\                               | -----                                                      | CAGGTCACGGGACCT--GTCATGTGAAAAGTG                           | <b>ATGCAATATGTGTCACATGACCGACTCTCCCTCC</b>                 | TGCT <b>GCTGGG</b> AGTCATATGAC <b>AGGCTTATGTT</b> |  |
| Aepi\                               | -----                                                      | CGGGTCACGGGACCT--GTCATGTGAAAAGTG                           | <b>ATGCAATATGTGTCACATGACCAACTCCCCC</b>                    | AT <b>CGTACTTGTGT</b> CATATGACGG <b>GCTTATGTT</b> |  |
| Amin\                               | -----                                                      | CAGGTCACGGGACCT--GTCATGTGAAAAGTG                           | <b>ATGCAATATGTGTCACATGACCTCACGGGCA</b>                    | CGTACAGGG <b>GTGTCATATGACATGCTCTCGAT</b>          |  |
| Afun\                               | -----                                                      | CAGGTCACGGGACCT--GTCATGTGAAAAGTG                           | <b>ATGCAATATGTGTCACATGACCTCACGGGCA</b>                    | AGGAGGG <b>GGCGT</b> CATATGAC <b>ATGCTCACGAT</b>  |  |
| Aste\                               | -----                                                      | TGGGTCACGGGACCT--GTCATGTGAAAAGTG                           | <b>ATGCAATATGTGTCACATGACCTCCTCCGACG</b>                   | CCTATGCT <b>GGTGT</b> CATATGAC <b>GTGCTTAGAAC</b> |  |
| Adir\                               | -----                                                      | CGGGTCACGGGACCTCCGTCATGTGAAAAGTG                           | <b>ACGAAATATGTGTCACATGACCTCGGTGGAT</b>                    | TT <b>CGTGCTGGTGT</b> CATATGAC <b>ATGCTCAGGAG</b> |  |
| Aalb\                               | -----                                                      | TGGGTCACGGGACCT--GTCATGTGAAAAGTG                           | <b>AAAATATGTTGTCACATGACTTCTCTCTCT</b>                     | CGG <b>CGGCAAGTGT</b> CATATGAC <b>ATGCCAAGAG</b>  |  |
| Adar\                               | -----                                                      | TGGGTCACGGGACCT--GTCATGTGAAAAGTG                           | <b>AAAATATGTTGTCACATGATCTGCGCTCTCT</b>                    | CGG <b>CGGCAAGTGT</b> CATATGAC <b>ATGGCGAGGGG</b> |  |
| Cqui\                               | TTT <b>TACCTTTGA</b> <b>TCATGTGA</b> AAGTTGCT <b>CAT</b>   | GTGGTCACGGGACCT--GTCATGTGAAGTGAC                           | CAAA <b>AAAGAGAGT</b> CACATGACCACTAGCAT <b>CG</b>         | -----                                             |  |
| Aaeg\                               | CT <b>CTTCTGTCTG</b> <b>TCATGTGA</b> GATATTT <b>TCCTT</b>  | GAGGTCACGGGACCT--GTCATGTGAAGCAAG                           | <b>AAACAAAAGTGT</b> CACATGACCACTAGTG <b>GGC</b>           | -----                                             |  |
|                                     |                                                            |                                                            |                                                           |                                                   |  |
| Mdes\                               | <b>CGAATGATAGAGTCATATGA</b> CT <b>TATCAGACTA</b>           | TTGTTTCAAAT <b>GTCA</b> TGTGAATGAAATGATAT                  | TGTGTGCGAAC <b>GTCACATGA</b> T <b>CAACA</b> TTTCAA        | -----                                             |  |
|                                     |                                                            |                                                            |                                                           |                                                   |  |
|                                     | 5' / 5' UTR                                                | intron2                                                    |                                                           |                                                   |  |
| Bmor\                               | <b>GCAACACTAAGATTCATATGAT</b> TGTTCAAT <b>AAA</b>          | ACGAACGAACA <b>TCATGTGA</b> CCAAGCAGT <b>ATT</b>           |                                                           |                                                   |  |
| Dple\                               | <b>TAA</b> CA <b>TTAAAGATCATATGAT</b> TGTTCAAT <b>GAA</b>  | TATGTAAT <b>TATATCACATGACAT</b> CTTAGTAT <b>C</b>          |                                                           |                                                   |  |
| Msex\                               | <b>GCAACACTGGGATCATATGAT</b> TGTTCAAT <b>GAA</b>           | GG <b>TGTAGGTATGTCACATGA</b> GAA <b>TTTGCACA</b>           |                                                           |                                                   |  |
| Hmel\                               | <b>CAACATTAATGATTCATATGAT</b> TGTTCAAT <b>GAA</b>          | -----                                                      |                                                           |                                                   |  |
| Pxyl\                               | <b>CAACACCAAAAATCATATGAT</b> CGTTCAAT <b>GAA</b>           | GTTGAATAGTGG <b>TCATGTGA</b> TTATGTTCAAG <b>G</b>          |                                                           |                                                   |  |
|                                     |                                                            |                                                            |                                                           |                                                   |  |
| Tcas\                               | ATAAGGTC <b>AAAAATCATATGAT</b> CAATCAGTCTG                 | TGCCTTTTCAT <b>GTCATGTGAT</b> CTATTGCAGTC                  |                                                           |                                                   |  |
| Dpon\                               | CACCTGCTCCC <b>ATCATATGAT</b> CAATCTACAAC                  | ATCTCATGCTGG <b>TCATGTGAT</b> TCGCATTGAC                   |                                                           |                                                   |  |
|                                     |                                                            |                                                            |                                                           |                                                   |  |
| Amel\                               | CACACTACTGT <b>GTTCATATGATCGTCA</b> TTAACT                 |                                                            |                                                           |                                                   |  |
| Aflo\                               | CACACTACTGT <b>GTTCATATGATCGTCA</b> TTAACT                 |                                                            |                                                           |                                                   |  |
| Bter\                               | ACACTACCTGT <b>GTTCATATGATCGTCA</b> TTAACT                 |                                                            |                                                           |                                                   |  |
| Bimp\                               | ACACTACCTGT <b>GTTCATATGATCGTCA</b> TTAACT                 |                                                            |                                                           |                                                   |  |
| Mrot\                               | ACTAGTCT <b>TTGTGTTCATATGATCATCA</b> TTAACT                |                                                            |                                                           |                                                   |  |
| Aech\                               | <b>TCACACTTCGGGTCATATGACCGACG</b> TTACGC                   |                                                            |                                                           |                                                   |  |
| Pbar\                               | <b>TCACACTTCGGGTCATATGACCGACG</b> TTACGC                   |                                                            |                                                           |                                                   |  |
| Hsal\                               | <b>TCACATTTCGGGTCATATGATCGACG</b> TTACGC                   |                                                            |                                                           |                                                   |  |
| Acep\                               | <b>TCATGCTTCGGGTCATATGACCGACG</b> TTACGC                   |                                                            |                                                           |                                                   |  |
| Lhum\                               | <b>TCACGCTTTGGGTCATATGACCGACG</b> TTACGC                   |                                                            |                                                           |                                                   |  |

Sinv\ TCACACTTTAGGTCATATGACCGACGTTACGC  
Cflo\ CACATTTTCGAGTCATATGACCGACGTTACGC  
Ngir\ TAACTCGGCCGGTCATATGATCGTCATGTGAG  
Nlon\ TAACTCGGCCGGTCATATGATCGTCATGTGAG  
Nvit\ TAACTCGGCTGGTCATATGATCGTCATGTGAG  
Lful\ CGTTGTACGATATCATATGATCAACTCGTAAC  
Phum\ TATGTGAATTGATCATATGATCGTCTGCAAAG  
  
Dpul\ CACCCACTGCTGTCACATGACAAACCAAATCAGCTGACACTAGTAAGGA  
Isca\ ACTCGGCCGGACATCAGATGACGGCTGTGCGGC

Atp6v1E gene structure comparison:

Key: UTR region, CDS region INTRON

| Order                   | Species                          | Atp6v1E orthologs                                          | 5'exon     |    | int  | exon | int | exon          |    |               | int  | exon3' |      | Extended CLEAR region                                                                                                                       | Position                                | bps from TSS                   |
|-------------------------|----------------------------------|------------------------------------------------------------|------------|----|------|------|-----|---------------|----|---------------|------|--------|------|---------------------------------------------------------------------------------------------------------------------------------------------|-----------------------------------------|--------------------------------|
| Diptera (Drosophilidae) | <i>Drosophila_melanogaster</i>   | <a href="#">Dmel\Vha26</a>                                 | 275        | 33 | 529  | 213  | 78  | 327           |    |               | 61   | 108    | 1353 | actttcgtgaaaTCATATGAtcgatttcgagt<br>ggatctcccaggTCATGTGAacttttcaccgc<br>aatctgtcgtggTCATGTGAacaggccccgc<br>catgtccagttaTCATGTGAcacacaggcaac | 5'UTR<br>intron1<br>intron1<br>intron1  | 48<br>447<br>614<br>794        |
| Diptera (Muscidae)      | <i>Musca_domestica</i>           | <a href="#">Mdom\Atp6v1E</a>                               |            | 33 | 1069 | 213  | 74  | 330           |    |               | 1462 | 108    |      | aaaatttccctTCACATGAtgggatatttac<br>tacaactaccaaTCACTTGAacttgaagttaa<br>tcatgggatagTCATGTGAatatattgtgtc<br>cattaacagaagTCATGTGAtcaaatgttagg  | 5'UTR?<br>5'UTR?<br>intron1<br>intron1  | >-294<br>>-265<br>>231<br>>457 |
| Diptera ( Tephritidae)  | <i>Ceratitis_capitata</i>        | <a href="#">Ccap\Atp6v1E</a>                               |            | 33 | 797  | 213  | 62  | 327           |    |               | 142  | 108    |      | aaatttcccaaTCATATGAaaaaaaaagg<br>tcatgggatgtTCATGTGAatcagaagtgtga<br>caatggggcttgTCATGTGAccaaccgaact<br>gcttacaactaaTCATGTGAttaaaatttga     | 5'UTR?<br>intron1<br>intron1<br>intron1 | >-305<br>>198<br>>390<br>>717  |
| Diptera (Glossinidae)   | <i>Glossina_morsitans</i>        | <a href="#">Gmor\Atp6v1E</a>                               | 106+88     | 33 | 1629 | 213  | 64  | 327 (132+195) |    |               | 858  | 108    | 223  | taacctgtttaTCATATGAccaagagaaaa<br>agattcgagtagTCATGTGAtcattgggtgaa                                                                          | 5'UTR?<br>intron1                       | -4<br>517                      |
| Diptera (Psychodidae)   | <i>Lutzomyia_longipalpis</i>     | <a href="#">Llon\Atp6v1E</a>                               | ND         | 33 | 669  | 213  | 59  | 132           | 60 | 303           |      |        | ND   | tacaactccaaaTCATATGActgactttgtc<br>ttttcctgaagTCATGTGAactctgccatg                                                                           | 5'UTR?<br>intron1                       | >-125<br>>442                  |
|                         | <i>Phlebotomus_papatasi</i>      | <a href="#">Ppap\Atp6v1E</a>                               | ND         | 33 | 609  | 213  | ND  | 132           | 69 | 303 (195+108) |      |        | ND   | taaatcacgaaTCATATGAtcaccttggaca<br>taaaatcgacgTCATGTGAattcaattgatt<br>ttttctccaagTCATGTGAacttgcacatgtt                                      | 5'UTR?<br>intron1<br>intron1            | >-122<br>>189<br>>411          |
|                         |                                  |                                                            |            |    |      |      |     |               |    |               |      |        |      |                                                                                                                                             |                                         |                                |
| Diptera (Culicidae)     | <i>Anopheles_gambiae</i>         | <a href="#">Agam\Atp6v1E</a><br><a href="#">AGAP002401</a> | 226+147+33 | 33 | 826  | 345  |     |               | 79 | 195           | 74   | 108    | ND   | tcacgggacctgTCATGTGAaaagtgtcaaac<br>atgcaatatgtTCACATGAccgactctcccc<br>tactgctgtagTCATATGAcgggcttacaag                                      | intron1<br>intron1<br>intron1           | 440<br>717<br>974              |
|                         | <i>Anopheles_arabiensis</i>      | <a href="#">Aara\Atp6v1E</a>                               | ND         | 33 | 830  | 345  |     |               | 79 | 195           | 74   | 108    | ND   | tcacgggacctgTCATGTGAaaagtgtcaaac<br>atgcaatatgtTCACATGAccgactctcccc<br>tactgctggagTCATATGAcgggcttacatg                                      | intron1<br>intron1<br>intron1           | >197<br>>476<br>>732           |
|                         | <i>Anopheles_quadriannulatus</i> | <a href="#">Aqan\Atp6v1E</a>                               | ND         | 33 | 829  | 345  |     |               | 80 | 195           | 74   | 108    | ND   | tcacgggacctgTCATGTGAaaagtgtcaaac<br>atgcaatatgtTCACATGAccgactctcccc<br>tactgctggagTCATATGAcgggcttacatg                                      | intron1<br>intron1<br>intron1           | >197<br>>475<br>>731           |
|                         | <i>Anopheles_christyi</i>        | <a href="#">Achr\Atp6v1E</a>                               | ND         | 33 | 805  | 345  |     |               | 81 | 195           | 85   | 108    | ND   | tcacgggacctgTCATGTGAaaagtgtcaaac<br>atgcaatatgtTCACATGAccgactctccc<br>tgctgctgggagTCATATGAcaggcttatgtt                                      | intron1<br>intron1<br>intron1           | >194<br>>468<br>>696           |
|                         | <i>Anopheles_epiroticus</i>      | <a href="#">Aepi\Atp6v1E</a>                               | ND         | 33 | 809  | 345  |     |               | 88 | 195           | 76   | 108    | ND   | tcacgggacctgTCATGTGAaaagtgtcaaac<br>atgcaatatgtTCACATGAccaactcccc<br>atcgtactgtgTCATATGAcgggcttatgtt                                        | intron1<br>intron1<br>intron1           | >186<br>>442<br>>680           |

|                            |                                |                                                            |           |    |      |                 |      |                 |      |                |      |     |      |                                                                                                                                             |                                     |                              |
|----------------------------|--------------------------------|------------------------------------------------------------|-----------|----|------|-----------------|------|-----------------|------|----------------|------|-----|------|---------------------------------------------------------------------------------------------------------------------------------------------|-------------------------------------|------------------------------|
|                            | <i>Anopheles_minimus</i>       | <a href="#">Amin\Atp6v1E</a>                               | ND        | 33 | 808  | 345             |      |                 | 62   | 195            | 65   | 108 | ND   | tcacggggaccgcgTCATGTGAaaagtgtcaaac<br>atgcaatatgtgTCACATGAccctcacggcgca<br>cgtacaggggggTCATATGAcatgctctcgat                                 | intron1<br>intron1<br>intron1       | >190<br>>463<br>>695         |
|                            | <i>Anopheles_funestus</i>      | <a href="#">Afun\Atp6v1E</a>                               | ND        | 33 | 796  | 345             |      |                 | 74   | 195            | 62   | 108 | ND   | tcacggggaccgcgTCATGTGAaaagtgtcaaac<br>atgcaatatgtgTCACATGAccctcacggcgca<br>aggagggggcgTCATATGAcatgctcacgat                                  | intron1<br>intron1<br>intron1       | >193<br>>459<br>>674         |
|                            | <i>Anopheles_stephensi</i>     | <a href="#">Aste\Atp6v1E</a>                               | ND        | 33 | 789  | 345             |      |                 | 89   | 195            | 74   | 108 | ND   | tcacggggaccgcgTCATGTGAaaagtgtcaaac<br>atgcaatatgtgTCACATGAcctctcgcgcg<br>cctatgctgggTCATATGAcgtgcttagaac                                    | intron1<br>intron1<br>intron1       | >194<br>>465<br>>681         |
|                            | <i>Anopheles_dirus</i>         | <a href="#">Adir\Atp6v1E</a>                               | ND        | 33 | 820  | 345             |      |                 | 69   | 195            | 64   | 108 | ND   | acggggacctccgTCATGTGAaaagtgtcaaac<br>acgaaatatgtgTCACATGAccctcgggtgat<br>ttcgtgctgggTCATATGAcatgctcaggag                                    | intron1<br>intron1<br>intron1       | >190<br>>459<br>>673         |
|                            | <i>Anopheles_nili</i>          | <a href="#">Anil\Atp6v1E</a>                               | ND        | ND | ND   | ND              |      |                 | ND   | ND             | ND   | 108 | ND   | ND                                                                                                                                          |                                     |                              |
|                            | <i>Anopheles_albimanus</i>     | <a href="#">Aalb\Atp6v1E</a>                               | ND        | 33 | 895  | 345             |      |                 | 76   | 195            | 80   | 108 | ND   | tcacggggacctgTCATGTGAaaagtgtgacaatc<br>aaaatatgtggTCACATGActtctctctctct<br>cggcggcgaagtTCATATGAcatgccgaagag                                 | intron1<br>intron1<br>intron1       | >315<br>>596<br>>828         |
|                            | <i>Anopheles_darlingi</i>      | <a href="#">Adar\Atp6v1E</a>                               | ND        | 33 | 904  | 345 (213 + 132) |      |                 | 74   | 195            | 78   | 108 | ND   | tcacggggacctgTCATGTGAaaagtgtgacaatc<br>aaaatatgtggTCACATGActtctctctctct<br>cggcggcgaagtTCATATGAcatgccgagggg                                 | intron1<br>intron1<br>intron1       | >317<br>>596<br>>831         |
|                            | <i>Aedes_aegypti</i>           | <a href="#">Aaeg\Atp6v1E</a><br><a href="#">AAEL012035</a> | 287       | 33 | 7946 | 213             | 62   | 132             | 66   | 195            | 118  | 108 | 1928 | ctcttctgctgTCATGTGAgatatttctct<br>tcacggggacctgTCATGTGAagcaagtgtatt<br>aaacaaaagtTCACATGAccactagtggcg                                       | 5'<br>intron1<br>intron1            | -8<br>671<br>1037            |
|                            | <i>Culex_pipiens_qui.</i>      | <a href="#">Cqui\Atp6v1E</a><br><a href="#">CPJ006751</a>  | 64+133+32 | 33 | 3758 | 213             | 66   | 132             | 55   | 195            | 65   | 108 | 537  | ttttaccttgaTCATGTGAgaagttgctcat<br>tcacggggacctgTCATGTGAagtgacatcgcg<br>caaaaaagagagTCACATGAccactgacatcg<br>cctttgacaaacTCACGTGAaattttctctc | 5'<br>intron1<br>intron1<br>intron1 | -27<br>>567<br>>870<br>>1485 |
| Diptera<br>(Cecidomyiidae) | <i>Mayetiola_destructor</i>    | <a href="#">Mdes\Atp6v1E</a>                               | ND        | 33 | 548  | 213             | 72   | 327 (132 + 195) |      |                | 83   | 108 | ND   | cgaatgatagagTCATATGActtatcagacta<br>ttgttcaaatgTCATGTGAatgaaatgatat<br>tgtgtgcgaacgTCACATGAtcaacatttcaa                                     | 5'<br>intron1<br>intron1            | >-341<br>>191<br>>383        |
|                            |                                |                                                            |           |    |      |                 |      |                 |      |                |      |     |      |                                                                                                                                             |                                     |                              |
| Lepidoptera                | <i>Bombyx_mori</i>             | <a href="#">Bmor\Atp6v1E</a><br><a href="#">LOC732990</a>  | ND        | 33 | 186  | 176             | 2169 | 169             | 462  | 195            | 1422 | 108 | ND   | gcaacactaagaTCATATGAttgttcaataaa<br>acgaacgaacaaTCATGTGAccaagcagtatt                                                                        | 5'<br>intron2                       | >-119<br>>457                |
|                            | <i>Manduca sexta</i>           | <a href="#">Msex\Atp6v1E</a>                               | ND        | 33 | 195  | 176             | 1821 | 169             | 618  | 195            | 510  | 108 | ND   | gcaacactgggaTCATATGAttgttcaatgaa<br>gggtgtaggtatgTCACATGAgaattttgcaca<br>ataaagttgatgTCATGTGAActtaagggttct                                  | 5'<br>intron2<br>intron2            | >-121<br>>572<br>>832        |
|                            | <i>Danaus_plexippus</i>        | <a href="#">Dple\Atp6v1E</a>                               | ND        | 33 | 201  | 176             | 434  | 169             | 348  | 195            | 149  | 108 | ND   | taacattaaagaTCATATGAttgttcaatgaa<br>tatgtaattataTCACATGAcatcttagtatc                                                                        | 5'<br>intron2                       | >-120<br>>440                |
|                            | <i>Heliconius_melpomene</i>    | <a href="#">Hmel\Atp6v1E</a>                               | ND        | 33 | 193  | 176             | 909  | 169             | 308  | 195            | 319  | 108 | ND   | caacattaatgaTCATATGAttgttcaatgaa                                                                                                            | 5'                                  | >-121                        |
|                            | <i>Plutella_xylostella</i>     | <a href="#">Pxyl\Atp6v1E</a>                               | ND        | 33 | 184  | 176             | 2072 | 169             | 435  | 195            | 628  | 108 | ND   | caacacccaaaaTCATATGAatgttcaatgaa<br>gttgaaatgtggTCATGTGAattatgttcaagg                                                                       | 5'<br>intron2                       | >-119<br>>665                |
|                            |                                |                                                            |           |    |      |                 |      |                 |      |                |      |     |      |                                                                                                                                             |                                     |                              |
| Strepsiptera               | <i>Mengenilla_moldrzyki</i>    | <a href="#">Mmol\Atp6v1E</a>                               | ND        | 33 | 54   | 176             | 970  | 169             | 819  | 303            |      |     | ND   | ND--                                                                                                                                        |                                     |                              |
| Coleoptera                 | <i>Tribolium_castaneum</i>     | <a href="#">Tcas\Atp6v1E</a><br><a href="#">LOC659201</a>  | 99        | 33 | 111  | 176             | 53   | 169             | 3968 | 303            |      |     | ND   | ataaggtcaaaaTCATATGAatcatcagctgtg<br>tgccctttcatgTCATGTGAatcatgagctc                                                                        | 5'<br>intron2                       | -16<br>454                   |
|                            | <i>Dendroctonus_ponderosae</i> | <a href="#">Dpon\Atp6v1E</a>                               | 99        | 33 | 117  | 176             | 615  | 169             | 226  | 303 (184 +119) |      |     | ND   | ataaaatgtggTCACATGAcagccaaatgtc<br>cacctgtcccaTCATATGAatcaatcacaac<br>atctcatgctggTCATGTGAatgcatttgac                                       | 5'<br>5'<br>intron2                 | >-149<br>>-118<br>>381       |
|                            |                                |                                                            |           |    |      |                 |      |                 |      |                |      |     |      |                                                                                                                                             |                                     |                              |

|                            |                               |                                               |      |     |      |             |      |     |      |                 |     |                |                                 |                                                                      |                                  |                |     |
|----------------------------|-------------------------------|-----------------------------------------------|------|-----|------|-------------|------|-----|------|-----------------|-----|----------------|---------------------------------|----------------------------------------------------------------------|----------------------------------|----------------|-----|
| Hymenoptera                | <i>Apis_mellifera</i>         | <a href="#">Ame\Atp6v1E<br/>GB12913</a>       | 194  | 33  | 914  | 176         | 133  | 169 | 202  | 184             | 217 | 119            | 301                             | cacactactgtgTCATATGAtcgtcattaact                                     | 5'UTR                            | 64             |     |
|                            | <i>Apis_florea</i>            | <a href="#">Aflo\Atp6v1E</a>                  | ND   | 33  | 1021 | 176         | 130  | 169 | 147  | 184             | 181 | 119            | ND                              | cacactactgtgTCATATGAtcgtcattaact                                     | 5'UTR?                           | >-124          |     |
|                            | <i>Bombus_terrestris</i>      | <a href="#">Bter\Atp6v1E<br/>LOC100648858</a> | 164  | 33  | 617  | 176         | 126  | 169 | 136  | 184             | 138 | 119            | 1377                            | acactactgtgTCATATGAtcgtcattaact                                      | 5'UTR                            | 16             |     |
|                            | <i>Bombus_impatiens</i>       | <a href="#">Bimp\Atp6v1E</a>                  | ND   | 33  | 1413 | 176         | 129  | 169 | 136  | 184             | 138 | 119            | ND                              | acactactgtgTCATATGAtcgtcattaact                                      | 5'UTR?                           | >-140          |     |
|                            | <i>Megachile_rotundata</i>    | <a href="#">Mrot\Atp6v1E</a>                  | ND   | 33  | 514  | 176         | 104  | 169 | 86   | 184             | 157 | 119            | ND                              | actagtcttgtgTCATATGAtcatcattaact                                     | 5'UTR?                           | >-132          |     |
|                            | <i>Acromyrmex_echinaior</i>   | <a href="#">Aech\Atpv1E<br/>AECH19756</a>     | ND   | 33  | 451  | 176         | 5279 | 169 | 101  | 184             | 195 | 119            | ND                              | tcacacttcgggTCATATGAccgacgttacgc                                     | 5'                               | >-134          |     |
|                            | <i>Atta_cephalotes</i>        | <a href="#">Acep\Atp6v1E<br/>ACEPI5444</a>    | ND   | 33  | 469  | 176         | 4706 | 169 | 103  | 184             | 291 | 119            | ND                              | tcatgcttcgggTCATATGAccgacgttacgc                                     | 5'                               | >-126          |     |
|                            | <i>Solenopsis_invicta</i>     | <a href="#">Sinv\Atp6v1E</a>                  | 88   | 33  | 590  | 176         | 194  | 169 | 97   | 184             | 140 | 119            | 486                             | tcacactttaggTCATATGAccgacgttacgc                                     | 5'                               | -46            |     |
|                            | <i>Camponotus_floridanus</i>  | <a href="#">Cflo\Atp6v1E</a>                  | ND   | 33  | 555  | 176         | 169  | 169 | 141  | 184             | 195 | 119            | ND                              | cacatttcgagTCATATGAccgacgttacgc                                      | 5'                               | >-136          |     |
|                            | <i>Harpegnathos_saltator</i>  | <a href="#">Hsal\Atp6v1E</a>                  | ND   | 33  | 563  | 176         | 208  | 169 | 129  | 184             | 245 | 119            | ND                              | tcacatttcgggTCATATGAtcgacgttacgc                                     | 5'                               | >-144          |     |
|                            | <i>Pogonomyrmex_barbatus</i>  | <a href="#">Pbar\Atp6v1E</a>                  | ND   | 33  | 512  | 176         | 199  | 169 | 95   | 184             | 215 | 119            | ND                              | tcacactcgggTCATATGAccgacgttacgc                                      | 5'                               | >-132          |     |
|                            | <i>Linepithema_humile</i>     | <a href="#">Lhum\Atp6v1E</a>                  | ND   | 33  | 566  | 176         | 174  | 169 | 129  | 184             | 74  | 119            | ND                              | tcacgctttgggTCATATGAccgacgttacgc                                     | 5'                               | >-147          |     |
|                            | <i>Nasonia_vitripennis</i>    | <a href="#">Nvit\Atp6v1E<br/>NV10403</a>      | >127 | 33  | 333  | 176         | 86   | 169 | 80   | 184             | 78  | 119            | 539                             | taactcggetggTCATATGAtcgtcatgtgag                                     | 5'                               | 144            |     |
|                            | <i>Nasonia_giraulti</i>       | <a href="#">Ngir\Atp6v1E</a>                  | ND   | 33  | 333  | 176         | 84   | 169 | 80   | 184             | 78  | 119            | ND                              | taactcgcccgTCATATGAtcgtcatgtgag                                      | 5'                               | ND             |     |
| <i>Nasonia_longicornis</i> | <a href="#">Nlon\Atp6v1E</a>  | ND                                            | 33   | 333 | 176  | 84          | 169  | 80  | 184  | 78              | 119 | ND             | taactcgcccgTCATATGAtcgtcatgtgag | 5'                                                                   | ND                               |                |     |
|                            |                               |                                               |      |     |      |             |      |     |      |                 |     |                |                                 |                                                                      |                                  |                |     |
| Hemiptera                  | <i>Acyrtosiphon_pisum</i>     | <a href="#">Apis\Atp6v1E</a>                  | ND   | 33  | 156  | 176         | 705  | 169 | 1177 | 303             |     |                | ND                              | ND                                                                   |                                  |                |     |
|                            | <i>Rhodnius_prolixus</i>      | <a href="#">Rpro\Atp6v1E</a>                  | 175  | 33  | 2126 | 176         | 1220 | 169 | 94   | 303             |     |                | 75                              | ND                                                                   |                                  |                |     |
| Phthiraptera               | <i>Pediculus_humanus</i>      | <a href="#">Phum\Atp6v1E<br/>PHUM598510</a>   | ND   | 33  | 279  | 176         | 87   | 169 | 88   | 303 (152 + 151) |     |                | ND                              | tatgtgaattgaTCATATGAtcgtctgcaaag                                     | 5'                               | >-94           |     |
| Odonata                    | <i>Ladona_fulva</i>           | <a href="#">Lful\Atp6v1E</a>                  |      | 33  | 156  | 176         | 384  | 169 | 188  | 152             | 329 | 151            |                                 | aacagaaatcatTCATATGAaccacttcgttg<br>cggtgtacgataTCATATGAtcaactcgtaac | 5'<br>5'                         | >-141<br>>-114 |     |
| Crustacea                  | <i>Daphnia_pulex</i>          | <a href="#">Dpul\Atp6v1E</a>                  | 128  | 33  | 72   | 176(66+110) | 64   | 169 | 59   | 152             | 71  | 151<br>(88+63) | 275                             | caccactgtgTCACATGAcaaacaaaTCAGCTGAcactagtaagga                       | 5'/5'UTR                         | -16/2          |     |
| Ixodida                    | <i>Ixodes_scapularis</i>      | <a href="#">Isca\Atp6v1E</a>                  | 98   | 33  | 122  | 66          | 244  | 110 | ND   | 184+2187+276    |     |                | 93                              | actcgccggacaTCACATGAcggetgtgcggc                                     | 5'                               | -1             |     |
|                            |                               |                                               |      |     |      |             |      |     |      |                 |     |                |                                 |                                                                      |                                  |                |     |
|                            | <i>Homo_sapiens</i>           | ATP6V1E1                                      | 127  | 33  | 9076 | 66          | 6140 | 110 | 332  | 67+11630+90     | 996 | 69+1738+95     | 3577                            | 88+1792+63                                                           | ttgccccgcagcTCATGTGActttgtctcggg | intron1-2      | 333 |
| Cnidaria                   | <i>Nematostella_vectensis</i> | <a href="#">Nvec\Atp6v1E</a>                  | 65   | 33  | 158  | 66          | 543  | 110 | 245  | 67+562+90       | 193 | 69+1053+95     | 875                             | 88+875+63                                                            | ccaattttccaTCACATGAaaattttattac  | 5'UTR          | 19  |
| Placozoa                   | <i>Trichoplax_adhaerens</i>   | <a href="#">Tadh\Atp6v1E</a>                  | 129  | 33  | 115  | 66          | 98   | 110 | 206  | 67+155+90       | 83  | 69+146+95      | 193                             | 151                                                                  | tacaatttatctTCACGTGAcatgcgttgat  | 5'             | -21 |
