# Supplementary material for: Structural and Comparative Analyses of Insects Suggest the Presence of an Ultra-Conserved Regulatory Element of the Genes Encoding Vacuolar-Type ATPase Subunits and Assembly Factors
Source: MDPI journal article supplement (doi:10.3390/biology12081127), 2023-08-13
Supplement: s1 [file s1]

|                              |                                                                                            |
|------------------------------|--------------------------------------------------------------------------------------------|
| Gene Cluster ID              | Atp6v1A                                                                                    |
| Drosophila melanogaster gene | Vha68-2 (CG3762)                                                                           |
| FlyBase ID                   | <a href="#">FBgn0020367</a>                                                                |
| Predicted function           | ATPase, H <sup>+</sup> transporting, lysosomal 70kDa, V1 subunit A                         |
| Protein size                 | 614 amino acids                                                                            |
| Cytogenetic map              | 2L:34A3-34A3                                                                               |
| Gene sequence location       | <a href="#">2L:12,974,322..12,978,607 [±]</a>                                              |
| Dmel CLEAR sequence          | TCAGCTGA; TCAGCTGA; TCACGTGA; TCAGCTGA                                                     |
| CLEAR sequence location      | 2L:12974792..12974799; 2L:12975013..12975020; 2L:12975303..12975310; 2L:12975499..12975506 |
| Drosophila Atp6v1A paralogs  | <a href="#">Vha68-1</a> (CG12403); <a href="#">Vha68-3</a> (CG5075)                        |

# FlyBase gene model & CLEAR element (red) positions:

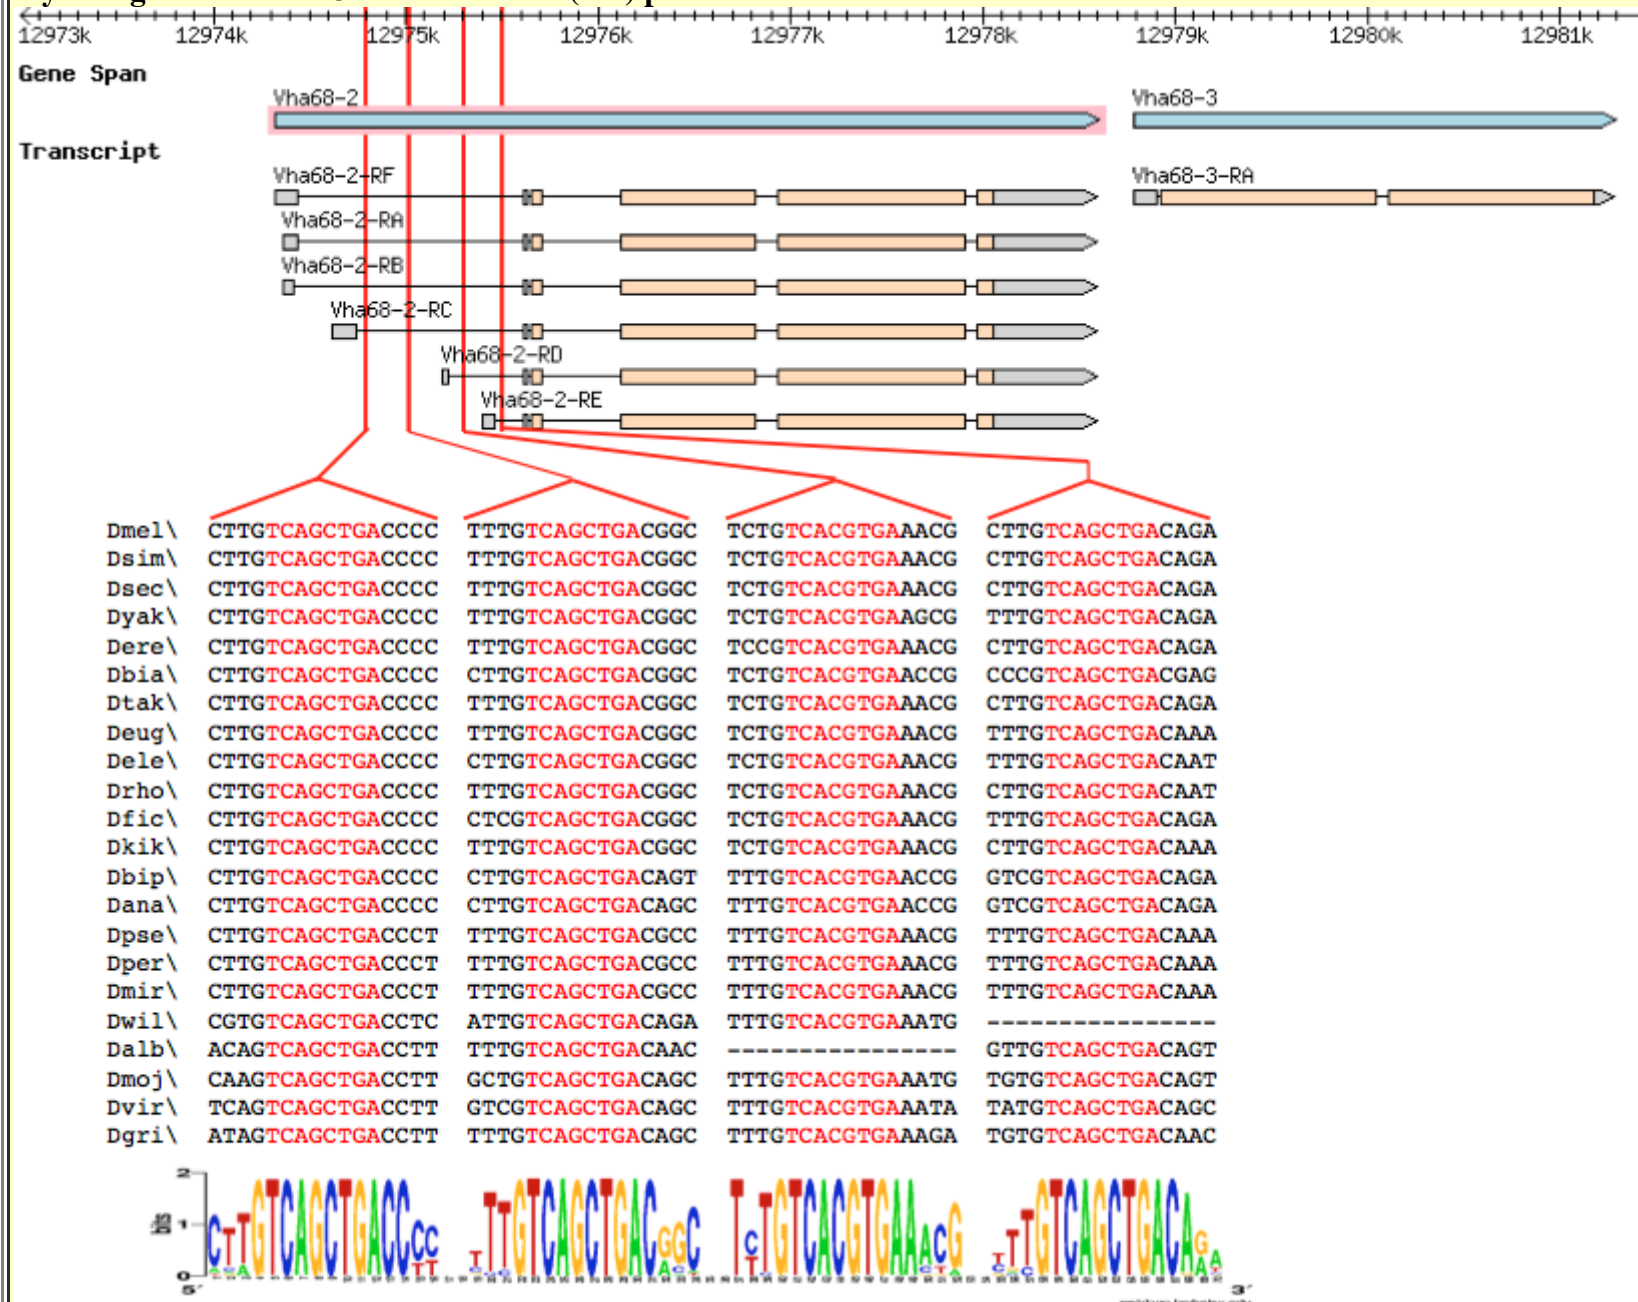

# Atp6v1A gene structure comparison:

Key: UTR region, CDS region

| Species                        | Atp6v1A orthologs            | 5'exon | intron | exon | intron | exon | intron | exon | intron | exon3' |    | Extended CLEAR region | Position                                                                                                                                       | bps from TSS                             |                           |
|--------------------------------|------------------------------|--------|--------|------|--------|------|--------|------|--------|--------|----|-----------------------|------------------------------------------------------------------------------------------------------------------------------------------------|------------------------------------------|---------------------------|
| <i>Drosophila_melanogaster</i> | <a href="#">Dmel\Vha68-2</a> | 124    | 1170   | 23   | 76     | 413  | 698    | 108  | 978    | 67     | 93 | 546                   | tattttgccttgTCAGCTGAcccccttccccg<br>tttttcatttgTCAGCTGAcggcaatgacag<br>ttcaaaagctctgTCACGTGAaacgaaagctct<br>acctgccccctgTCAGCTGAcagaggcgctgag  | intron1<br>intron1<br>intron1<br>intron1 | 470<br>691<br>981<br>1177 |
| <i>Drosophila_simulans</i>     | <a href="#">Dsim\Vha68-2</a> |        |        |      | 76     | 346  | 698    | 104  | 978    | 67     | 93 |                       | tattttgccttgTCAGCTGAcccccttccccg<br>tttttcatttgTCAGCTGAcggcaatgacag<br>ttcaaaagctctgTCACGTGAaacgaaagctct<br>acctgccccctgTCAGCTGAcagaggcgctgag  | intron1<br>intron1<br>intron1<br>intron1 |                           |
| <i>Drosophila_sechellia</i>    | <a href="#">Dsec\GM10085</a> |        |        |      | 76     | 357  | 698    | 108  | 978    | 67     | 93 |                       | tattttgccttgTCAGCTGAcccccttccccg<br>tttttcatttgTCAGCTGAcggcaatgacag<br>ttcaaaagctctgTCACGTGAaacgaaagctct<br>acctgccccctgTCAGCTGAcagaggcgctgag  | intron1<br>intron1<br>intron1<br>intron1 |                           |
| <i>Drosophila_yakuba</i>       | <a href="#">Dyak\GE18610</a> |        |        |      | 76     | 352  | 698    | 111  | 978    | 67     | 93 |                       | tattttgccttgTCAGCTGAcccccttccccg<br>tttttcatttgTCAGCTGAcggcaatgacag<br>ttcaaaagctctgTCACGTGAagcgaaagctct<br>acctgccccctgTCAGCTGAcagaggcgccaag  | intron1<br>intron1<br>intron1<br>intron1 |                           |
| <i>Drosophila_erecta</i>       | <a href="#">Dere\GG23804</a> |        |        |      | 76     | 378  | 698    | 111  | 978    | 69     | 93 |                       | tattttgccttgTCAGCTGAcccccttccccg<br>tttttcatttgTCAGCTGAcggcaatgacag<br>ttcaaaagctccgTCACGTGAaacgaaagctct<br>acctgtccccctgTCAGCTGAcagaggcgccaag | intron1<br>intron1<br>intron1<br>intron1 |                           |
| <i>Drosophila_biarmipes</i>    | <a href="#">Dbia\Vha68-2</a> |        |        |      | 76     | 440  | 698    | 66   | 978    | 63     | 93 |                       | tatttgccttgTCAGCTGAcccccttccccg<br>cttttcaactgTCAGCTGAcggcaatgacag<br>ttcaaaagctctgTCACGTGAaccgaaagctct<br>tcacctgccccgTCAGCTGAcgaggcgctaac    | intron1<br>intron1<br>intron1<br>intron1 |                           |
| <i>Drosophila_suzukii</i>      | <a href="#">Dsuz\Vha68-2</a> | 98     | 1132   | 22   | 76     | 634  | 698    | 67   | 978    | 66     | 93 |                       | aattttgccttgTCAGCTGAcccccttccccg<br>tttttcatttgTCAGCTGAcggcaatgacag<br>ttcaaaagctctgTCACGTGAaacgaaagctct<br>cctgccccctcgTCAGCTGAcgaaggcgtaac   | intron1<br>intron1<br>intron1<br>intron1 | 430<br>636<br>919<br>1118 |
| <i>Drosophila_takahashii</i>   | <a href="#">Dtak\Vha68-2</a> |        |        |      | 76     | 546  | 698    | 332  | 978    | 65     | 93 |                       | tattttgccttgTCAGCTGAcccccttccccg<br>tttttcatttgTCAGCTGAcggcaatgacag<br>ttcaaaagctctgTCACGTGAaacgaaagctcc<br>cctgcccccttgTCAGCTGAcagaggcgtaac   | intron1<br>intron1<br>intron1<br>intron1 |                           |
| <i>Drosophila_eugracilis</i>   | <a href="#">Deug\Vha68-2</a> |        |        |      | 76     | 427  | 698    | 63   | 978    | 65     | 93 |                       | tattttgccttgTCAGCTGAcccccttccccg<br>tttttcatttgTCAGCTGAcggcaatgacag<br>ttcaaaagctctgTCACGTGAaacgaaagctct<br>ctgctctcttgTCAGCTGAcaaaactaaacc    | intron1<br>intron1<br>intron1<br>intron1 |                           |
| <i>Drosophila_elegans</i>      | <a href="#">Dele\Vha68-2</a> |        |        |      | 76     | 503  | 698    | 66   | 978    | 66     | 93 |                       | tattttaccttgTCAGCTGAcccccttccccg<br>tttttcaactgTCAGCTGAcggcaatgacag<br>ttcaaaagctctgTCACGTGAaacgaaagctct<br>cctgcccccttgTCAGCTGAcaatggccaac    | intron1<br>intron1<br>intron1<br>intron1 |                           |

|                                 |                              |  |  |  |    |     |      |     |     |     |    |  |                                                                                                                                            |                                          |  |
|---------------------------------|------------------------------|--|--|--|----|-----|------|-----|-----|-----|----|--|--------------------------------------------------------------------------------------------------------------------------------------------|------------------------------------------|--|
| <i>Drosophila_rhopaloea</i>     | <a href="#">Drho\Vha68-2</a> |  |  |  | 76 | 718 | 698  | 60  | 978 | 67  | 93 |  | tattttgccttgTCAGCTGAccccctccccg<br>tttttcatttgTCAGCTGAcggcaatgacag<br>ttaaagctctgTCACGTGAaacgaaagctct<br>cctgcgctctgTCAGCTGAcagtggccaac    | intron1<br>intron1<br>intron1<br>intron1 |  |
| <i>Drosophila_ficusphila</i>    | <a href="#">Dfic\Vha68-2</a> |  |  |  | 76 | 452 | 698  | 65  | 978 | 67  | 93 |  | tattttgccttgTCAGCTGAccccctccccg<br>tttttcgctcgTCAGCTGAcggcaatgacag<br>ttcaaagctctgTCACGTGAaacgaaagctct<br>cctgtttttgTCAGCTGAcagaagagccaa   | intron1<br>intron1<br>intron1<br>intron1 |  |
| <i>Drosophila_kikkawai</i>      | <a href="#">Dkik\Vha68-2</a> |  |  |  | 76 | 403 | 1676 |     |     | 68  | 93 |  | tattttgccttgTCAGCTGAccccgctccccg<br>tttttcatttgTCAGCTGAcggcaatgacag<br>cgcaaagctctgTCACGTGAaacgaaagctct<br>acctgttcttgTCAGCTGAcaaaaggcccaa | intron1<br>intron1<br>intron1<br>intron1 |  |
| <i>Drosophila_bipectinata</i>   | <a href="#">Dbip\Vha68-2</a> |  |  |  | 76 | 162 | 698  | 159 | 978 | 65  | 93 |  | tattttgcttgTCAGCTGAccctccctctc<br>ttttccacttgTCAGCTGAcagtgtcttctg<br>cgcaaagcttgTCACGTGAaccgaaagctct<br>tctcgctgtcgTCAGCTGAcagaggcccaa     | intron1<br>intron1<br>intron1<br>intron1 |  |
| <i>Drosophila_ananassae</i>     | <a href="#">Dana\GF14214</a> |  |  |  | 76 | 109 | 698  | 109 | 978 | 63  | 93 |  | tattttgccttgTCAGCTGAccctctccctc<br>ttttccacttgTCAGCTGAcagcggtcttctg<br>cgcaaagcttgTCACGTGAaccgaaagctct<br>tctggcccgctgTCAGCTGAcagaggcgcaac | intron1<br>intron1<br>intron1<br>intron1 |  |
| <i>Drosophila_pseudoobscura</i> | <a href="#">Dpse\GA28953</a> |  |  |  | 76 | 62  | 698  | 73  | 978 | 68  | 93 |  | tattttgccttgTCAGCTGAccctccctcgc<br>tttttcatttgTCAGCTGAcgccaatgacag<br>gccaaagcttgTCACGTGAaacgaaagctct<br>cacctcgatttgTCAGCTGAcaaaaggccag   | intron1<br>intron1<br>intron1<br>intron1 |  |
| <i>Drosophila_persimilis</i>    | <a href="#">Dper\Vha68-2</a> |  |  |  | 76 | 62  | 700? | 73  | 978 | 68  | 93 |  | tattttgccttgTCAGCTGAccctccctcgc<br>tttttcatttgTCAGCTGAcgccaatgacag<br>gccaaagcttgTCACGTGAaacgaaagctct<br>cacctcgatttgTCAGCTGAcaaaaggccag   | intron1<br>intron1<br>intron1<br>intron1 |  |
| <i>Drosophila_miranda</i>       | <a href="#">Dmir\Vha68-2</a> |  |  |  | 76 | 62  | 698  | 65  | 978 | 68  | 93 |  | tattttgccttgTCAGCTGAccctccctcgc<br>tttttcatttgTCAGCTGAcgccaatgacag<br>gccaaagcttgTCACGTGAaacgaaagctct<br>cacctcgatttgTCAGCTGAcaaaaggccag   | intron1<br>intron1<br>intron1<br>intron1 |  |
| <i>Drosophila_willistoni</i>    | <a href="#">Dwil\GK15307</a> |  |  |  | 76 | 70  | 698  | 57  | 978 | 72  | 93 |  | tttttcgcttgTCAGCTGAcctccctcgc<br>ttctccaattgTCAGCTGAcagaaaagaca<br>cgcaaagcttgTCACGTGAaatgaaagctct                                         | intron1<br>intron1<br>intron1<br>intron1 |  |
| <i>Drosophila_albomicans</i>    | <a href="#">Dalb\Vha68-2</a> |  |  |  | 76 | 68  | 698? | 62  | 978 | 170 | 93 |  | atagttgcacagTCAGCTGAccttcgctcgc<br>tttttcatttgTCAGCTGAcacatgacagt<br>attaacctgttgTCAGCTGAcagtataagaa                                       | intron1<br>intron1<br>intron1<br>intron1 |  |
| <i>Drosophila_mojavensis</i>    | <a href="#">Dmoj\GI18088</a> |  |  |  | 76 | 78  | 698  | 62  | 978 | 68  | 93 |  | atattgtcaagTCAGCTGAccttacgccgt<br>ccagttgtcgtTCAGCTGAcagcatgacagt<br>tgcaaagcttgTCACGTGAaatgaaagctct<br>gcgctctatgTCAGCTGAcagtataagaa      | intron1<br>intron1<br>intron1<br>intron1 |  |
| <i>Drosophila_virilis</i>       | <a href="#">Dvir\GJ16804</a> |  |  |  | 76 | 74  | 698  | 58  | 978 | 83  | 93 |  | ataattgttcagTCAGCTGAccttcgccccg<br>ttcagtcgctgTCAGCTGAcagcatgacagt<br>tgaaaagcttgTCACGTGAaataaaagctct<br>gcctctatatgTCAGCTGAcagcataagaa    | intron1<br>intron1<br>intron1<br>intron1 |  |

|                                 |                              |  |  |    |    |     |     |      |     |     |    |  |                                                                                                                                          |                               |  |
|---------------------------------|------------------------------|--|--|----|----|-----|-----|------|-----|-----|----|--|------------------------------------------------------------------------------------------------------------------------------------------|-------------------------------|--|
| <i>Drosophila_grimshawi</i>     | <a href="#">Dgri\GH11385</a> |  |  |    | 76 | 60  | 698 | 59   | 978 | 61  | 93 |  | ataattggatagTCAGCTGAccttccactgc<br>ttttccatttgTCAGCTGAcagcatgacagc<br>cttaagccttgTCAGCTGAaagaaaagctct<br>ctctcgggtgtgTCAGCTGAaacgataagaa | intron1<br>intron1<br>intron1 |  |
| Vha68-1 (CG12403)               |                              |  |  |    |    |     |     |      |     |     |    |  |                                                                                                                                          |                               |  |
| <i>Drosophila_melanogaster</i>  | <a href="#">Dmel\Vha68-1</a> |  |  |    | 76 | 263 | 698 | 85   | 978 | 55  | 93 |  | -                                                                                                                                        |                               |  |
| <i>Drosophila_simulans</i>      | <a href="#">Dsim\GD22093</a> |  |  |    | 76 | 240 | 698 | 85   | 978 | 55  | 93 |  |                                                                                                                                          |                               |  |
| <i>Drosophila_sechellia</i>     | <a href="#">Dsec\GM25943</a> |  |  |    | 76 | 187 | 698 | 85   | 978 | 55  | 93 |  |                                                                                                                                          |                               |  |
| <i>Drosophila_yakuba</i>        | <a href="#">Dyak\GE11978</a> |  |  |    | 76 | 334 | 698 | 95   | 978 | 58  | 93 |  | -                                                                                                                                        |                               |  |
| <i>Drosophila_erecta</i>        | <a href="#">Dere\GG10233</a> |  |  |    | 76 | 240 | 698 | 85   | 978 | 58  | 93 |  | -                                                                                                                                        |                               |  |
| <i>Drosophila_biarmipes</i>     | <a href="#">Dbia\Vha68-1</a> |  |  |    | 76 | 217 | 698 | 285  | 978 | 99  | 93 |  |                                                                                                                                          |                               |  |
| <i>Drosophila_suzukii</i>       | <a href="#">Dsuz\Vha68-1</a> |  |  | 56 | 76 | 220 | 698 | 423  | 978 | 97  | 93 |  |                                                                                                                                          |                               |  |
| <i>Drosophila_takahashii</i>    | <a href="#">Dtak\Vha68-1</a> |  |  |    | 76 | 612 | 698 | 364  | 978 | 55  | 93 |  | -                                                                                                                                        |                               |  |
| <i>Drosophila_eugracilis</i>    | <a href="#">Deug\Vha68-1</a> |  |  |    | 76 | 236 | 698 | 87   | 978 | 96  | 93 |  |                                                                                                                                          |                               |  |
| <i>Drosophila_elegans</i>       | <a href="#">Dele\Vha68-1</a> |  |  |    | 76 | 101 | 698 | 679  | 978 | 318 | 93 |  |                                                                                                                                          |                               |  |
| <i>Drosophila_rhopaloea</i>     | <a href="#">Drho\Vha68-1</a> |  |  |    | 76 | 146 | 698 | 141  | 978 | 54  | 93 |  | -                                                                                                                                        |                               |  |
| <i>Drosophila_ficusphila</i>    | <a href="#">Dfic\Vha68-1</a> |  |  |    | 76 | 469 | 698 | 364  | 978 | 83  | 93 |  |                                                                                                                                          |                               |  |
| <i>Drosophila_kikkawai</i>      | <a href="#">Dkik\Vha68-1</a> |  |  |    | 76 | 86  | 698 | 1178 | 978 | 55  | 93 |  | -                                                                                                                                        |                               |  |
| <i>Drosophila_bipunctata</i>    | <a href="#">Dbip\Vha68-1</a> |  |  |    | 76 | 71  | 698 | 74   | 978 | 80  | 93 |  | -                                                                                                                                        |                               |  |
| <i>Drosophila_ananassae</i>     | <a href="#">Dana\GF15651</a> |  |  |    | 76 | 76  | 698 | 66   | 978 | 58  | 93 |  |                                                                                                                                          |                               |  |
| <i>Drosophila_pseudoobscura</i> | <a href="#">Dpse\GA11612</a> |  |  |    | 76 | 77  | 698 | 70   | 978 | 66  | 93 |  |                                                                                                                                          |                               |  |
| <i>Drosophila_persimilis</i>    | <a href="#">Dper\GL24783</a> |  |  |    | 76 | 77  | 698 | 70   | 978 | 66  | 93 |  | -                                                                                                                                        |                               |  |
| <i>Drosophila_miranda</i>       | <a href="#">Dmir\Vha68-1</a> |  |  |    | 76 | 74  | 698 | 70   | 978 | 66  | 93 |  |                                                                                                                                          |                               |  |
| <i>Drosophila_willistoni</i>    | <a href="#">Dwil\GK14815</a> |  |  |    | 76 | 87  | 698 | 57   | 978 | 59  | 93 |  | -                                                                                                                                        |                               |  |
| <i>Drosophila_albomicans</i>    | <a href="#">Dalb\Vha68-1</a> |  |  |    | 76 | ND  | 698 | 66   | 978 | 59  | 93 |  |                                                                                                                                          |                               |  |
| <i>Drosophila_mojavensis</i>    | <a href="#">Dmoj\GI21237</a> |  |  |    | 76 | 84  | 698 | 62   | 978 | 68  | 93 |  |                                                                                                                                          |                               |  |
| <i>Drosophila_virilis</i>       | <a href="#">Dvir\GJ11069</a> |  |  |    | 76 | 70  | 698 | 58   | 978 | 70  | 93 |  | -                                                                                                                                        |                               |  |
| <i>Drosophila_grimshawi</i>     | <a href="#">Dgri\GH10350</a> |  |  |    | 76 | 79  | 698 | 59   | 978 | 70  | 93 |  | -                                                                                                                                        |                               |  |
| Vha68-3 (CG5075)                |                              |  |  |    |    |     |     |      |     |     |    |  |                                                                                                                                          |                               |  |

|                                 |                               |  |  |  |      |      |      |  |  |  |  |
|---------------------------------|-------------------------------|--|--|--|------|------|------|--|--|--|--|
| <i>Drosophila_melanogaster</i>  | <a href="#">Dmel\Vha68-3</a>  |  |  |  | 1149 | 63   | 1083 |  |  |  |  |
| <i>Drosophila_simulans</i>      | <a href="#">Dsim\GD23861*</a> |  |  |  | 1149 | 96   | 1083 |  |  |  |  |
| <i>Drosophila_sechellia</i>     | <a href="#">Dsec\GM10088</a>  |  |  |  | 1149 | 94   | 1083 |  |  |  |  |
| <i>Drosophila_yakuba</i>        | <a href="#">Dyak\GE18611</a>  |  |  |  | 1149 | 99   | 1083 |  |  |  |  |
| <i>Drosophila_erecta</i>        | <a href="#">Dere\GG23805</a>  |  |  |  | 1122 | 165  | 1083 |  |  |  |  |
| <i>Drosophila_eugracilis</i>    |                               |  |  |  |      |      |      |  |  |  |  |
| <i>Drosophila_suzukii</i>       | <a href="#">Dsuz\Vha-3</a>    |  |  |  | 1170 | 1787 | 1083 |  |  |  |  |
| <i>Drosophila_takahashii</i>    |                               |  |  |  |      |      |      |  |  |  |  |
| <i>Drosophila_ficusphila</i>    | <a href="#">Dfic\Vha68-3</a>  |  |  |  | 1251 | 632  | 1083 |  |  |  |  |
| <i>Drosophila_elegans</i>       | -                             |  |  |  |      |      |      |  |  |  |  |
| <i>Drosophila_rhopaloea</i>     | <a href="#">Drho\Vha68-3</a>  |  |  |  | 783  | 1210 | 1083 |  |  |  |  |
| <i>Drosophila_kikkawai</i>      |                               |  |  |  |      |      |      |  |  |  |  |
| <i>Drosophila_biarmipes</i>     | -                             |  |  |  |      |      |      |  |  |  |  |
| <i>Drosophila_bipectinata</i>   | <a href="#">Dbip\Vha68-3</a>  |  |  |  | 1158 | 108  | 1083 |  |  |  |  |
| <i>Drosophila_ananassae</i>     |                               |  |  |  |      |      |      |  |  |  |  |
| <i>Drosophila_pseudoobscura</i> | <a href="#">Dpse\GA18641</a>  |  |  |  | 1083 | 65   | 1089 |  |  |  |  |
| <i>Drosophila_persimilis</i>    | <a href="#">Dper\GL24733*</a> |  |  |  | 1080 | 65   | 1089 |  |  |  |  |
| <i>Drosophila_miranda</i>       | <a href="#">Dmir\Vha68-3</a>  |  |  |  | 1083 | 65   | 1089 |  |  |  |  |
| <i>Drosophila_willistoni</i>    | <a href="#">Dwil\GK15309</a>  |  |  |  | 1104 | 57   | 1086 |  |  |  |  |
| <i>Drosophila_mojavensis</i>    |                               |  |  |  |      |      |      |  |  |  |  |
| <i>Drosophila_virilis</i>       |                               |  |  |  |      |      |      |  |  |  |  |
| <i>Drosophila_grimshawi</i>     | <a href="#">Dgri\GH11386</a>  |  |  |  | 1161 | 502  | 1086 |  |  |  |  |
