# Supplementary material for: Structural and Comparative Analyses of Insects Suggest the Presence of an Ultra-Conserved Regulatory Element of the Genes Encoding Vacuolar-Type ATPase Subunits and Assembly Factors
Source: MDPI journal article supplement (doi:10.3390/biology12081127), 2023-08-13
Supplement: s1 [file s1]

| Gene Cluster ID                                                  |                           |                            |              |        |        |        |      |                             |      |             |             |           |           |            | Atp6v0a-1                                        |        |       |        |      |                   |      |        |      |        |               |             |            |               |            |            |             |                       |          |              |                               |     |                                  |                                 |         |      |     |                                 |                                 |        |      |  |  |
|------------------------------------------------------------------|---------------------------|----------------------------|--------------|--------|--------|--------|------|-----------------------------|------|-------------|-------------|-----------|-----------|------------|--------------------------------------------------|--------|-------|--------|------|-------------------|------|--------|------|--------|---------------|-------------|------------|---------------|------------|------------|-------------|-----------------------|----------|--------------|-------------------------------|-----|----------------------------------|---------------------------------|---------|------|-----|---------------------------------|---------------------------------|--------|------|--|--|
| Protein Cluster ID                                               |                           |                            |              |        |        |        |      |                             |      |             |             |           |           |            | ATP6V0A-1                                        |        |       |        |      |                   |      |        |      |        |               |             |            |               |            |            |             |                       |          |              |                               |     |                                  |                                 |         |      |     |                                 |                                 |        |      |  |  |
| Drosophila melanogaster gene                                     |                           |                            |              |        |        |        |      |                             |      |             |             |           |           |            | Vha100-1 (CG1709)                                |        |       |        |      |                   |      |        |      |        |               |             |            |               |            |            |             |                       |          |              |                               |     |                                  |                                 |         |      |     |                                 |                                 |        |      |  |  |
| FlyBase ID                                                       |                           |                            |              |        |        |        |      |                             |      |             |             |           |           |            | FBgn0028671                                      |        |       |        |      |                   |      |        |      |        |               |             |            |               |            |            |             |                       |          |              |                               |     |                                  |                                 |         |      |     |                                 |                                 |        |      |  |  |
| Predicted function                                               |                           |                            |              |        |        |        |      |                             |      |             |             |           |           |            | ATPase, H+ transporting, lysosomal V0 subunit a1 |        |       |        |      |                   |      |        |      |        |               |             |            |               |            |            |             |                       |          |              |                               |     |                                  |                                 |         |      |     |                                 |                                 |        |      |  |  |
| Atp6v0a-1 gene structure comparisons:                            |                           |                            |              |        |        |        |      |                             |      |             |             |           |           |            |                                                  |        |       |        |      |                   |      |        |      |        |               |             |            |               |            |            |             |                       |          |              |                               |     |                                  |                                 |         |      |     |                                 |                                 |        |      |  |  |
| Key: UTR region. CDS region , alternatively spliced exons INTRON |                           |                            |              |        |        |        |      |                             |      |             |             |           |           |            |                                                  |        |       |        |      |                   |      |        |      |        |               |             |            |               |            |            |             |                       |          |              |                               |     |                                  |                                 |         |      |     |                                 |                                 |        |      |  |  |
| Order                                                            | Species                   | Atp6v0a1 orthologs         | 5' exon      | intron | 5'exon | intron | exon | intron                      | exon | intron      | exon        | intron    | exon      | intron     | exon                                             | intron | exon  | intron | exon | intron            | exon | intron | exon | intron | exon          | intron      | exon       | intron        | exon       | intron     | exon3'      | Extended CLEAR region | Position | bps from TSS |                               |     |                                  |                                 |         |      |     |                                 |                                 |        |      |  |  |
| Diptera (Drosophilidae)                                          | Drosophila_melanogaster   | DmelVha100-1               | 129          | 414    | 23     | 117    | 300  | 177                         | 73   | 129         | 767         | 92 (158)  | 431       | 101+595+42 | 450                                              | 127    | 86    | 1156   |      |                   |      |        |      |        |               |             |            | ND            | 218        | 376        | 211         | 65                    | 172      | 60           | 103                           | 294 | ND                               |                                 |         |      |     |                                 |                                 |        |      |  |  |
|                                                                  | Diptera (Muscidae)        | Musca_domestica            | MdomVha100-1 |        |        |        | 117  | 62                          | 177  | 63          | 129         | 3674      | 95        | 4023       | ND                                               | ND     | 127   | 62     | 1159 |                   |      |        |      |        |               |             |            |               | 58         | 218        | 305         | 205                   | 1085     | 172          | 65                            | 112 |                                  | ND                              |         |      |     |                                 |                                 |        |      |  |  |
| Diptera (Tephritidae)                                            | Ceratitis_capitata        | CcapVha100-1               |              |        |        | 117    | 96   | 177                         | 65   | 129         | 3674        | 95        | 4084      | ND         | ND                                               | 127    | 2346  | 1159   |      |                   |      |        |      |        |               |             |            | 106           | 218        | 586        | 223         | 106                   | 172      | 63           | 112                           |     | ND                               |                                 |         |      |     |                                 |                                 |        |      |  |  |
| Diptera (Glossinidae)                                            | Glossina_morsitans        | GmorVAtp6v0a1              |              |        | 40     | 117    | 64   | 177                         | 52   | 129         | 3802        | 92        | 548       | 98+ND+ND   | 2108                                             | 127    | 57    | 1159   |      |                   |      |        |      |        |               |             |            | 54            | 218        | 1184       | 208         | 729                   | 172      | 60           | 112                           |     | ND                               |                                 |         |      |     |                                 |                                 |        |      |  |  |
| Diptera (Psychodidae)                                            | Lutzomyia_longipalpis     | LlonVAtp6v0a1              |              |        |        | 117    | 79   | 177                         | 172  | 129         | ND          | ND        | ND        | ND         | ND                                               | 127    | 63    | 1902?  |      |                   |      |        |      |        |               |             |            |               |            |            |             |                       |          |              |                               |     | ND                               |                                 |         |      |     |                                 |                                 |        |      |  |  |
|                                                                  | Phlebotomus_papatasi      | PpapVAtp6v0a1              |              |        |        | 117    | 70   | 177                         | 62   | 129         | ND          | ND        | ND        | ND         | ND                                               | 127    | ND    | 1890   |      |                   |      |        |      |        |               |             |            |               |            |            |             |                       |          |              |                               |     | ND                               |                                 |         |      |     |                                 |                                 |        |      |  |  |
|                                                                  |                           |                            |              |        |        |        |      |                             |      |             |             |           |           |            |                                                  |        |       |        |      |                   |      |        |      |        |               |             |            |               |            |            |             |                       |          |              |                               |     |                                  |                                 |         |      |     |                                 |                                 |        |      |  |  |
| Diptera (Culicidae)                                              | Anopheles_gambiae         | AgamVAtp6v0a1 AGAP003711   | 76           | 905    | 63     | 117    | 96   | 306                         |      |             | 1909 (1858) | 101 (152) | 1969      | 95+438+42  | 1618                                             | 127    | 71    | 1380   |      |                   |      |        |      |        |               |             |            | 79            | 250        | 88         | 172         | 95                    | 103      | 614          | gcctgcctgcTCATGTGAgtcggaatc   | 5'  | 617                              |                                 |         |      |     |                                 |                                 |        |      |  |  |
|                                                                  | Anopheles_arabiensis      | AaraVAtp6v0a1              |              |        |        | 117    | 106  | 306                         |      |             | 1913 (1862) | 101 (152) | 1997      | 95+432+42  | 1623                                             | 127    | 71    | 1380   |      |                   |      |        |      |        |               |             |            | 79            | 250        | 87         | 172         | 95                    | 103      |              | gcctgcctgcTCATGTGAgtcggaagc   | 5'  | > -467                           |                                 |         |      |     |                                 |                                 |        |      |  |  |
|                                                                  | Anopheles_quadrimaculatus | AqanVAtp6v0a1              |              |        |        | 117    | 98   | 306                         |      |             | 1919 (1868) | 101 (152) | 1985      | 95+435+42  | 1633                                             | 127    | 71    | 1380   |      |                   |      |        |      |        |               |             |            | 79            | 250        | 87         | 172         | 95                    | 103      |              | gcctgcctgcTCATGTGAgtcggaatc   | 5'  | > -471                           |                                 |         |      |     |                                 |                                 |        |      |  |  |
|                                                                  | Anopheles_christyi        | AchrVAtp6v0a1              |              |        |        | 117    | 95   | 306                         |      |             | 1855 (1804) | 101 (152) | 1922      | 95+422+42  | 1567                                             | 127    | 87    | 1380   |      |                   |      |        |      |        |               |             |            | 82            | 259        | 67         | 172         | 72                    | 103      |              | gcctgcctgcTCATGTGAgttgcaatc   | 5'  | > -411 > -370                    |                                 |         |      |     |                                 |                                 |        |      |  |  |
|                                                                  | Anopheles_epitropicus     | AepiVAtp6v0a1              |              |        |        | 117    | 94   | 306                         |      |             | 2040 (1997) | 101 (152) | 2041      | 95+411+42  | 1665                                             | 127    | 88    | 1380   |      |                   |      |        |      |        |               |             |            | 68            | 256        | 76         | 172         | 103                   | 103      |              | tgctcttaccTCATGTGAgtcgagaaat  | 5'  | > -461                           |                                 |         |      |     |                                 |                                 |        |      |  |  |
|                                                                  | Anopheles_minimus         | AminVAtp6v0a1              |              |        |        | 117    | 69   | 306                         |      |             | 2304 (2253) | 101 (152) | 1830      | 95+429+42  | 1359                                             | 127    | 68    | 1380   |      |                   |      |        |      |        |               |             |            | 89            | 256        | 94         | 172         | 84                    | 103      |              | gcctgagccacTCATGTGAgttgaatc   | 5'  | > -406                           |                                 |         |      |     |                                 |                                 |        |      |  |  |
|                                                                  | Anopheles_funestus        | AfunVAtp6v0a1              |              |        |        | 117    | 70   | 306                         |      |             | 2268 (2217) | 101 (152) | 1818      | 95+432+42  | 1525                                             | 127    | 75    | 1377   |      |                   |      |        |      |        |               |             |            | 77            | 256        | 80         | 172         | 89                    | 103      |              | gcctgcctgcTCATGTGAgttgaatc    | 5'  | > -408                           |                                 |         |      |     |                                 |                                 |        |      |  |  |
|                                                                  | Anopheles_stephensi       | AsteVAtp6v0a1              |              |        |        | 117    | 98   | 305*(A base deletion at 95) |      |             | 2438 (2387) | 101 (152) | ND        | ND         | ND                                               | 127    | 80    | 1377   |      |                   |      |        |      |        |               |             |            | 118           | 250        | 71         | 172         | 88                    | 103      |              | attatcgcaccTCATGTGAgtatggtgta | 5'  | > -436                           |                                 |         |      |     |                                 |                                 |        |      |  |  |
|                                                                  | Anopheles_dirus           | AdirVAtp6v0a1              |              |        |        | 117    | 99   | 306                         |      |             | 1968 (1917) | 101 (152) | 1852      | 95+423+42  | 1449                                             | 127    | 81    | 1380   |      |                   |      |        |      |        |               |             |            | 69            | 250        | 86         | 172         | 76                    | 103      |              |                               | ND  |                                  |                                 |         |      |     |                                 |                                 |        |      |  |  |
|                                                                  | Anopheles_nili            | AnilVAtp6v0a1              |              |        |        | 117    | 66   | 306                         |      |             | ND          | 101 (152) | 1669      | 95+417+42  | ND                                               | 127    | 80    | 1380?  |      |                   |      |        |      |        |               |             |            | 84            | ND         | ND         | ND          | ND                    | ND       |              |                               | ND  |                                  |                                 |         |      |     |                                 |                                 |        |      |  |  |
|                                                                  | Anopheles_albimanus       | AalbVAtp6v0a1              |              |        |        | 117    | 113  | 306                         |      |             | 2060 (2009) | 101 (152) | 1998      | 95+368+42  | 1282                                             | 127    | 98    | 1380   |      |                   |      |        |      |        |               |             |            | 82            | 247        | 95         | 172         | 117                   | 103      |              |                               | ND  |                                  |                                 |         |      |     |                                 |                                 |        |      |  |  |
|                                                                  | Anopheles_darlingi        | AdarVAtp6v0a1              |              |        |        | 117    | 98   | 306                         |      |             | 2127 (2076) | 101 (152) | 2011      | 95+416+42  | 1250                                             | 127    | 91    | 1380   |      |                   |      |        |      |        |               |             |            | 89            | 247        | 79         | 172         | 115                   | 103      |              |                               | ND  |                                  |                                 |         |      |     |                                 |                                 |        |      |  |  |
|                                                                  | Aedes_aegypti             | AaegVAtp6v0a1 AAEL003743   | 119          | 21603  | 73     | 117    | 61   | 306                         |      |             | 8727 (8673) | 101 (155) | 10223     | 98+373+42  | 865                                              | 127    | 10180 | 1374   |      |                   |      |        |      |        |               |             |            | 171           | 247        | 1170       | 172         | 63                    | 103      | 423          |                               | ND  |                                  |                                 |         |      |     |                                 |                                 |        |      |  |  |
| Culex_pipiens_qui.                                               | CquiVAtp6v0a1 CQ005774    |                            |              |        | 117    | 68     | 306  |                             |      | 4573 (4519) | 101 (155)   | 1694      | 95+510+42 | 912        | 127                                              | 1676   | 1618  |        |      |                   |      |        |      |        |               |             |            |               | 78         | 172        | 63          | 103                   |          |              | ND                            |     |                                  |                                 |         |      |     |                                 |                                 |        |      |  |  |
| Diptera (Cecidomyiidae)                                          | Mayetiola_destructor      | MdesVAtp6v0a1              |              |        | 117    | 619    | 177  | 97                          | 129  | ND          | ND          | 89 (155)  | ND        | ND         | ND                                               | 127    | 77    | 390    |      |                   |      | 91     | 984  |        |               |             |            |               |            |            |             |                       | 89       | 223          | 634                           | 172 | 96                               | 103                             |         |      | ND  |                                 |                                 |        |      |  |  |
| Lepidoptera                                                      | Bombyx_mori               | BmorVAtp6v0a1              |              |        | 183    | 117    | 2623 | 180                         | 464  | 129         | 1376        | 86        | 18949     | ND         | ND                                               | 127    | 888   | 177    | 2018 | 213               | 219  | 151    | 433  | 140    | 885           | 237+487+113 | 1030       | 149?          | ND         | 137?+ND+87 | 505         | 114+170+127           | 1170     | 133          | 1024                          | 100 | 207                              | accgtaaatgaTCATGTGAactgattaaaaa | intron1 | 1783 |     |                                 |                                 |        |      |  |  |
|                                                                  | Manduca sexta             | MsexVAtp6v0a1              |              |        | 117    | 4147   | 180  | 997                         | 129  | 892         | 86          | 17147     | ND        | ND         | 127                                              | 522    | 177   | 2679   | 213  | 495               | 151  | 539    | 140  | 231    | 237+369+113   | 329         | 149        | 321           | 137+449+87 | 552        | 114+495+127 | 460                   | 133      | 436          | 100                           |     | actgtgaccagTCACATGAactgattaaaaca | intron1                         | >1612   |      |     |                                 |                                 |        |      |  |  |
|                                                                  | Danaus_plexippus          | DpleVAtp6v0a1              |              |        | 153    | 117    | 2089 | 180                         | 794  | 129         | 626         | 86        | 698       | 89         | 5127                                             | 127    | 223   | 177    | 771  | 213               | 459  | 151    | 86   | 140    | 164           | 237+129+113 | 327        | 149           | 237        | 131+82+87  | 569         | 114+77+127            | 260      | 133          | 643                           | 100 |                                  | ttatcatcagaTCATGTGAgttgattataat | intron1 | 1463 |     |                                 |                                 |        |      |  |  |
|                                                                  | Heliconius_melpomene      | HmelVAtp6v0a1              |              |        | 117    | 3423   | 180  | 308                         | 129  | 962         | 86          | 1001      | 89        | ND         | 127                                              | 1367   | 177   | ND     | 213  | 378               | 151  | 401    | 140  | 194    | 237+217+113   | 108         | 143        | 207           | 137+304+87 | 316        | 114+310+127 | 371                   | 133      | 280          | 100                           |     | atcacagtaaaTCACATGAattgattataat  | intron1                         | >1901   |      |     |                                 |                                 |        |      |  |  |
|                                                                  | Plutella_rylostella       | PxyVAtp6v0a1               |              |        | 145    | 117    | 1777 | 180                         | 1025 | 129         | 1488        | 86        | 878       | 89         | ND                                               | 127    | 821   | 177    | 1952 | 213               | 277  | 151    | 297  | 140    | 2945          | 237+368+113 | 403        | 143           | 426        | 137+316+87 | 584         | 114+408+127           | 458      | 133          | 2598                          | 100 | 64                               |                                 |         |      |     |                                 |                                 |        |      |  |  |
|                                                                  |                           |                            |              |        |        |        |      |                             |      |             |             |           |           |            |                                                  |        |       |        |      |                   |      |        |      |        |               |             |            |               |            |            |             |                       |          |              |                               |     |                                  |                                 |         |      |     |                                 |                                 |        |      |  |  |
| Strepsiptera                                                     | Mengenilla_moldrzyki      | MmolVAtp6v0a1              |              |        |        | 117    | ND   | 177                         | ND   | 129         | ND          | ND        | ND        | ND         | ND                                               | 127    | 48    | 390    |      |                   |      | 459    | 291  |        |               |             | 540        | 350 (237+113) | 1459       | 131        | 1723        | 239                   |          |              |                               | 989 | 217                              | 848                             | 172     | 3847 | 103 |                                 |                                 | ND     |      |  |  |
| Coleoptera                                                       | Tribolium_castaneum       | TcasVAtp6v0a1              |              |        | 139    | 117    | 99   | 177                         | 51   | 129         | 3195        | 86 (110)  | 1907      | ND         | ND                                               | 127    | 48    | 177    | 52   | 504 (213+151+140) |      |        |      | 46     | 350 (237+113) | 48          | 128        | 402           | 230        |            |             |                       | 70       | 202          | 243                           | 172 | 48                               | 103                             |         |      | ND  |                                 |                                 |        |      |  |  |
|                                                                  | Dendroctonus_ponderosae   | DponVAtp6v0a1              |              |        | 132    | 117    | 3290 | 177                         | 55   | 129         | 4022        | 86 (110)  | 7037      | ND         | ND                                               | 127    | 472   | 177    | 54   | 213               | 53   | 291    |      |        |               | 84          | 205+52+148 | 59            | 128        | 745        | 236         |                       |          |              | 51                            | 229 | 70                               | 172                             | 61      | 103  | 134 | ctgcacgttggTCACGTGAaccgcgaat    | 5'                              | -332   |      |  |  |
|                                                                  |                           |                            |              |        |        |        |      |                             |      |             |             |           |           |            |                                                  |        |       |        |      |                   |      |        |      |        |               |             |            |               |            |            |             |                       |          |              |                               |     |                                  |                                 |         |      |     |                                 |                                 |        |      |  |  |
| Hymenoptera                                                      | Apis_mellifera            | AmelVAtp6v0a1              |              |        | 199    | 117    | 365  | 306                         |      |             | ND          | 86 (113)  | ND        | 101        | ND                                               | 127    | 126   | 177    | ND   | 213               | 78   | 769    |      |        |               |             |            |               |            |            |             | 158                   | 230      | 632          | 220                           | 173 | 172                              | ND                              | 103     |      |     | ttccaaactgaTCATATGAactaattgaat  | 5'                              | -339   |      |  |  |
|                                                                  | Apis_florea               | AfloVAtp6v0a1              |              |        |        | 117    | 1100 | 306?                        |      |             | 13453       | 86 (113)  | 9185      | 101        | 6221                                             | 127    | 78    | 177    | ND   | 213               | 71   | 769    |      |        |               |             |            |               |            |            |             | 141                   | 230      | 691          | 220                           | 174 | 172                              | 285                             | 103     |      |     | ttccaaactgaTCATATGAactaattgaat  | 5'                              | > -538 |      |  |  |
|                                                                  | Bombus_terrestris         | BterVAtp6v0a1 LOC100644609 |              |        | 286    | 117    | 2099 | 306                         |      |             | ND          | 86 (113)  | 6891      | 101        | 2531                                             | 127    | 101   | 177    | 360  | 213               | 77   | 769    |      |        |               |             |            |               |            |            |             | 75                    | 233      | 96           | 217                           | 81  | 172                              | 144                             | 103     | 526  |     |                                 | ttccaaactgaTCATATGAaccacaaggagt | 5'     | -401 |  |  |
|                                                                  | Bombus_impatiens          | BimpVAtp6v0a1              |              |        |        | 117    | 2090 | 306                         |      |             | 7195        | 86 (113)  | 6896      | 101        | 2574                                             | 127    | 102   | 177    | 404  | 213               | 79   | 769    |      |        |               |             |            |               |            |            |             | 75                    | 233      | 94           | 217                           | 81  | 172                              | 144                             | 103     |      |     | ttccaaactgaTCATATGAaccacaaggagt | 5'                              | > -678 |      |  |  |

|                     |                        |                   |         |        |        |             |      |                  |             |             |       |                     |      |        |          |        |            |                        |      |        |            |            |       |             |             |                       |            |                                  |                             |                                                               |           |                |      |                |       |                                                                                                  |                              |                                |                           |          |
|---------------------|------------------------|-------------------|---------|--------|--------|-------------|------|------------------|-------------|-------------|-------|---------------------|------|--------|----------|--------|------------|------------------------|------|--------|------------|------------|-------|-------------|-------------|-----------------------|------------|----------------------------------|-----------------------------|---------------------------------------------------------------|-----------|----------------|------|----------------|-------|--------------------------------------------------------------------------------------------------|------------------------------|--------------------------------|---------------------------|----------|
|                     | Megachile_rotundata    | MrotAtp6v0a1      |         |        |        | 117         | 1596 | 306              | 4878        | 86<br>(113) | 3368  | 101                 | 2172 | 127    | 83       | 177    | 80         | 213                    | 70   | 769    | 68         | 233        | 79    | 217         | 85          | 172                   | 87         | 103                              |                             | tcataagttTCATATGAacagtatca                                    | 5'        | > 697          |      |                |       |                                                                                                  |                              |                                |                           |          |
|                     | Acromyrmex_echinator   | AechAtp6v0a1      |         |        |        | 117         | 161  | 306              | 7790        | 86<br>(113) | 12487 | 101                 | 3250 | 127    | 175      | 177    | 372        | 213                    | 91   | 1379   |            |            |       |             |             |                       | 212        | 103                              |                             | tttcgactggaTCATGTGAacatgcgatg                                 | 5'        | > 979          |      |                |       |                                                                                                  |                              |                                |                           |          |
|                     | Atta_cephalotes        | AcepAtp6v0a1      |         |        |        | 117         | 156  | 306              | 9745        | 86<br>(113) | 12045 | 101                 | 3471 | 127    | 175      | 177    | 341        | 213                    | 97   | 1379   |            |            |       |             |             |                       | 211        | 103                              |                             | tgaacattggaTCACATGAacattgcgatg                                | 5'        | > 1615         |      |                |       |                                                                                                  |                              |                                |                           |          |
|                     | Solenopsis_invicta     | SinvAtp6v0a1      |         |        |        | 117         | 963  | 306              | 6761        | 86<br>(113) | 9313  | 101                 | 3098 | 127    | 910      | 177    | 207        | 213                    | 97   | 1418   |            |            |       |             |             |                       | 860        | 103                              |                             | tttttaactaTCAATTGAacatgcgatta<br>caatgagatgaTCAGTTGAgaataaaaa | 5'<br>5'  | > 355<br>> 289 |      |                |       |                                                                                                  |                              |                                |                           |          |
|                     | Pogonomyrmex_barbatus  | PharAtp6v0a1      |         |        |        | 117         | 128  | 306              | 4123        | 86<br>(113) | 5708  | 101                 | 1762 | 127    | 215      | 177    | 147        | 213                    | 74   | 1382   |            |            |       |             |             |                       | 232        | 103                              |                             | tttcagacggaTCATGTGAattgcagaca<br>atttttagaTCACGTGAacactgacct  | 5'<br>5'  | > 791<br>> 413 |      |                |       |                                                                                                  |                              |                                |                           |          |
|                     | Camponotus_floridanus  | CfloAtp6v0a1      |         |        |        | 117         | 189  | 306              | 3265        | 86<br>(113) | 5672  | 101                 | 1449 | 127    | 143      | 177    | 342        | 213                    | 77   | 1379   |            |            |       |             |             |                       | 258        | 103                              |                             | ND                                                            |           |                |      |                |       |                                                                                                  |                              |                                |                           |          |
|                     | Linepithema_humile     | LhumAtp6v0a1      |         |        |        | 117         | 178  | 306              | 3393        | 86<br>(113) | 4984  | 101                 | 1620 | 127    | 256      | 177    | 102        | 213                    | 93   | 1394   |            |            |       |             |             |                       | 706        | 103                              |                             | caagaagcggaTCACGTGAacattgcgat                                 | 5'        | > 175          |      |                |       |                                                                                                  |                              |                                |                           |          |
|                     | Harpegnathos_saltator  | HsalAtp6v0a1      |         |        |        | 117         | 346  | 306              | 3199        | 86<br>(113) | 4614  | 101                 | 1649 | 127    | 246      | 177    | 160        | 213                    | 92   | 1388   |            |            |       |             |             |                       | 332        | 103                              |                             | ectcgctaccaTCACGTGAacgtcgctcg                                 | 5'        | > 206          |      |                |       |                                                                                                  |                              |                                |                           |          |
|                     | Nasonia_vitripennis    | NvirAtp6v0a1      |         |        | 391    | 117         | 604  | 306              | 2338        | 86<br>(113) | 3271  | 101                 | 3316 | 127    | 248      | 390    |            | 80                     | 778  | 65     | 224        | 356        | 208   | 80          | 172         | 82                    | 112        | 660                              |                             | ttttctcggaTCATATGAacctttgac                                   | 5'        | 267            |      |                |       |                                                                                                  |                              |                                |                           |          |
| Nasonia_giraulti    | NgirAtp6v0a1           |                   |         |        | 117    | 604         | 306  | 2350             | 86<br>(113) | 3222        | 101   | 3317                | 127  | 249    | 390      |        | 80         | 778                    | 65   | 224    | 355        | 208        | 80    | 172         | 82          | 112                   |            |                                  | ttttctcggaTCATATGAacctttgac | 5'                                                            | > 658     |                |      |                |       |                                                                                                  |                              |                                |                           |          |
| Nasonia_longicornis | NlonAtp6v0a1           |                   |         |        | 117    | 602         | 306  | 2366             | 86<br>(113) | 3248        | 101   | 3338                | 127  | 248    | 390      |        | 80         | 778                    | 65   | 224    | 355        | 208        | 80    | 172         | 82          | 112                   |            |                                  | ttttctcggaTCATATGAacctttgac | 5'                                                            | > 658     |                |      |                |       |                                                                                                  |                              |                                |                           |          |
|                     |                        |                   |         |        |        |             |      |                  |             |             |       |                     |      |        |          |        |            |                        |      |        |            |            |       |             |             |                       |            |                                  |                             |                                                               |           |                |      |                |       |                                                                                                  |                              |                                |                           |          |
| Odonata             | Ladona_fulva           | LfulAtp6v0a1      |         |        |        | 117         | 150  | 177              | 1488        | 129         | 2642  | 86                  | ND   | ND     | ND       | ND     | ND         | 111                    | 213  | 598    | 151        | 572        | 140   | 114         | 237+256+110 | 1594                  | 125        | 80                               | 116+354+108                 | 763                                                           | 259       | 162            | 172  | ND             | 103   |                                                                                                  | taactcgatTCATATGAacgactgagtc | 5'                             | > 76                      |          |
|                     |                        | LfulAtp6v0a2      |         |        |        | 114         | 509  | 177              | 4068        | 129         | 465   | 86                  | 812  |        |          |        | 127        | 372                    | 177  | ND     | 213        | 1289       | 151   | 127         | 140         | 1882                  | 243+ND+113 | 122                              | 125                         | 131                                                           | 116+ND+ND | 5688           | 226  | 409            | 172   | 868                                                                                              | 97                           |                                | ND                        |          |
| Phthiraptera        | Pediculus_humanus      | PhumAtp6v0a1      |         |        |        | 117         | 1940 | 177              | 175         | 129         | ND    | 86                  | ND   | ND     | ND       | 127    | 84         | 177                    | 90   | 213    | 88         | 141        | 106   | 150         | 65          | 165+131+185           | 85         | 128                              | 105                         | 224                                                           | 77        | 214            | 73   | 172            | 95    | 103                                                                                              |                              | aaaataagtggaTCACATGAgaataataaa | intron1                   | >568     |
|                     |                        | PhumAtp6v0a2      |         |        |        | 117         | 101  | 177              | 107         | 129         | 315   | 95                  | 546  |        |          |        | 127        | 83                     | 177  | 73     | 213        | 68         | 151   | 83          | 140         | 68                    | 237+85+113 | 103                              | 125                         | 71                                                            | 224       | 88             | 226  | 79             | 172   | 78                                                                                               | 97                           |                                | aagttgtgTCACGTGAaataagatt | intron 5 |
| Crustacea           | Daphnia_pulex          | DpulAtp6v0a1      |         |        | 136    | 114         | 161  | 306              |             | 813         | 86    | 1092                | 92   | 285    | 127      | 75     | 270+66+120 | 61                     | 291  | 69     | 353        | 71         | 131   | 71          | 116+77+111  | 60                    | 123+66+88  | 77                               | 172                         | 73                                                            | 97        | 166            |      | ND             |       |                                                                                                  |                              |                                |                           |          |
|                     |                        | DpulAtp6v0a2      | ND      |        | ND     | 114         | 116  | 231+82+79+117+76 |             | 232         |       |                     |      |        | 65+72+62 | 61     | 270+93+120 | 401                    | 285  | 68     | 222+81+146 | 66         | 131   | 76          | 146+66+111  | 505                   | 198+139+88 | 79                               | 175                         | 64                                                            | 94        |                | ND   |                |       |                                                                                                  |                              |                                |                           |          |
| Ixodida             | Ixodes_scapularis      | IscaAtp6v0a1      | ND      |        | ND     | 117         | 95   | 79+ND+98         | 462         | 129         | ND    | 86                  | 5004 |        |          | 127    | 3251       | 83+97+94               | 413  | 213    | 455        | 151        | 1930  | 140         | 422         | 137+1495+79           | 995        | 119                              | 4996                        | 223                                                           | 1932      | 382            |      | 172            | 3023  | 97                                                                                               |                              | agaaggggaTCATGTGAacatttcggctc  | intron2                   | >392     |
|                     |                        | IscaAtp6v0a2      | ND      |        | ND     | 117         | ND   | 79+ND+101        | ND          | 129         | ND    | 86                  | 184  |        |          | 127    | 1850       | 83+ND+94+567+107+ND+55 | ND   | 181    | 1965       | 140        | 2016  | 149+1374+82 | ND          | 119                   | 82         | 51+624+235+4884+111              | ND                          | 364                                                           | ND        | 175            | ND   |                |       | gggcgaattTCACGTGAcaaatctt                                                                        | intron 1                     | > 1792                         |                           |          |
|                     |                        |                   |         |        |        |             |      |                  |             |             |       |                     |      |        |          |        |            |                        |      |        |            |            |       |             |             |                       |            |                                  |                             |                                                               |           |                |      |                |       |                                                                                                  |                              |                                |                           |          |
| Order               | Species                | Atp6v0a orthologs | 5' exon | intron | 5'exon | intron      | exon | intron           | exon        | intron      | exons | intron              | exon | intron | exon     | intron | exon       | intron                 | exon | intron | exon       | intron     | exons | intron      | exon        | intron                | exon       | intron                           | exon3'                      | Extended CLEAR region                                         | Position  | bps from TSS   |      |                |       |                                                                                                  |                              |                                |                           |          |
|                     | Homo_sapiens           | ATP6V0A1          | 120     | 1884   | 47     | 117         | 5417 | 79+1502+98       | 1982        | 129         | 7420  | 104+720+127+2077+83 | 2288 | 94     | 4023     | 213    | 3119       | 151                    | 3696 | 140    | 560        | 155+437+91 | 3207  | 119         | 1664        | 217+273+108+6215+108  | 6233       | 118                              | 310                         | 172                                                           | 6566      | 94             |      | GGATCAAATGACAA | 5'UTR | 303                                                                                              |                              |                                |                           |          |
|                     |                        | ATP6V0A2          |         |        | 248    | 117         | 5940 | 79+3649+98       | 2205        | 138         | 1405  | 89+1497+127+6016+83 | 1522 | 94     | 1434     | 213    | 6513       | 151                    | 265  | 137    | 259        | 188+97+91  | 2634  | 119         | 849         | 211+2324+120+1053+120 | 2017       | 118                              | 2277                        | 172                                                           | 940       | 106            | 3723 | ND             |       |                                                                                                  |                              |                                |                           |          |
|                     |                        | ATP6V0A3          | 104     | 2148   | 4      | 117         | 364  | 79+811+221       |             | 82          |       | 86+339+127+73+83    | 160  | 94     | 224      | 213    | 613        | 145                    | 2330 | 140    | 74         | 158+77+91  | 906   | 119         | 83          | 214+368+126+173+105   | 70         | 118                              | 232                         | 178                                                           | 76        | 79             | 81   | ND             |       |                                                                                                  |                              |                                |                           |          |
| Cnidaria            | Nematostella_vectensis | PhumAtp6v0a1      |         |        |        | 96+89+21    | 159  | 79+77+98         | 2396        | 129         | 418   | 110+699+210         | 703  | 94     | 128      | 78     | 176        | 135                    | 264  | 151    | 490        | 140        | 511   | 152+99+97   | 501         | 119                   | 354        | 46+550+84+649+87+105+108+335+114 | 192                         | 118                                                           | 362       | 102+594+70     | 541  | 94             | 423   | gcacagactgTCACGTGAacagagtggtg<br>tctgtgtggaTCATGTGAacatggggat<br>ttactctctTCACATGAattctatttaacaa | 5'<br>intron1<br>intron3     | >-92<br>>274<br>>901           |                           |          |
| Placozoa            | Trichoplax_adhaerens   | TadhAtp6v0a1      |         |        |        | 96          | 1159 | 79+228+98        | 259         | 129         | 185   | 116+91+127+192+83   | 140  | 94     | 87       | 78     | 75         | 135                    | 115  | 151    | 106        | 140        | 77    | 140+105+88  | 83          | 119                   | 93         | 46+82+84+173+87+98+117+151+126   | 94                          | 118                                                           | 108       | 172            | 75   | 106            |       | ttgtgtgtgTCACATGAgtgttgcat<br>tgaatgaagcaTCATGTGAacagattcata                                     | 5'<br>5'                     | >440<br>>-376                  |                           |          |
|                     |                        | TadhAtp6v0a2      |         |        |        | 96+384+21   | 116  | 79+166+98        | 242         | 129         | 139   | 101+139+127+144+83  | 95   | 94     | 89       | 78     | 87         | 135                    | 243  | 151    | 101        | 137        | 205   | 176+64+91   | 82          | 119                   | 108        | 46+218+84+136+106+214+120+141+86 | 104                         | 118                                                           | 169       | 102+138+70     | 147  | 91             |       | ccatgcagcaTCATGTGAaagaattcaat                                                                    | 5'                           | >-160                          |                           |          |
|                     |                        | TadhAtp6v0a3      |         |        |        | 108+2785+21 | 449  | 79+453+98        | 129         | 129         | 215   | 107+94+127+95+83    | 77   |        | 172      |        | 86         | 135                    | 116  | 151    | 87         | 137        | 155   | 140+92+88   | 132         | 119                   | 146        | 46+81+84+73+84+75+114+75+84?     | 56                          | 151                                                           | 84        | 105+101+70     | 89   | 91             |       |                                                                                                  |                              |                                |                           |          |
