# Supplementary material for: Structural and Comparative Analyses of Insects Suggest the Presence of an Ultra-Conserved Regulatory Element of the Genes Encoding Vacuolar-Type ATPase Subunits and Assembly Factors
Source: MDPI journal article supplement (doi:10.3390/biology12081127), 2023-08-13
Supplement: s1 [file s1]

|                                     |                                                                          |
|-------------------------------------|--------------------------------------------------------------------------|
| Gene Cluster ID                     | Atp6ap1                                                                  |
| <b>Drosophila melanogaster gene</b> | <b>VhaAC45 (CG8029)</b>                                                  |
| FlyBase ID                          | <a href="#">FBgn0262515</a>                                              |
| <b>Predicted function</b>           | <b>ATPase, H<sup>+</sup> transporting, lysosomal accessory protein 1</b> |
| Protein size                        | 379 amino acids                                                          |
| Cytogenetic map                     | 2R:45B4-45B4                                                             |
| Gene sequence location              | <a href="#">2R:5095067..5097169</a> [+]                                  |
| <b>Dmel CLEAR sequence</b>          | <b>TCACATGA</b>                                                          |
| CLEAR sequence location             | 2R:5095055..5095062                                                      |

FlyBase VhaAC45 (CG8029) gene model & CLEAR element (red) position:

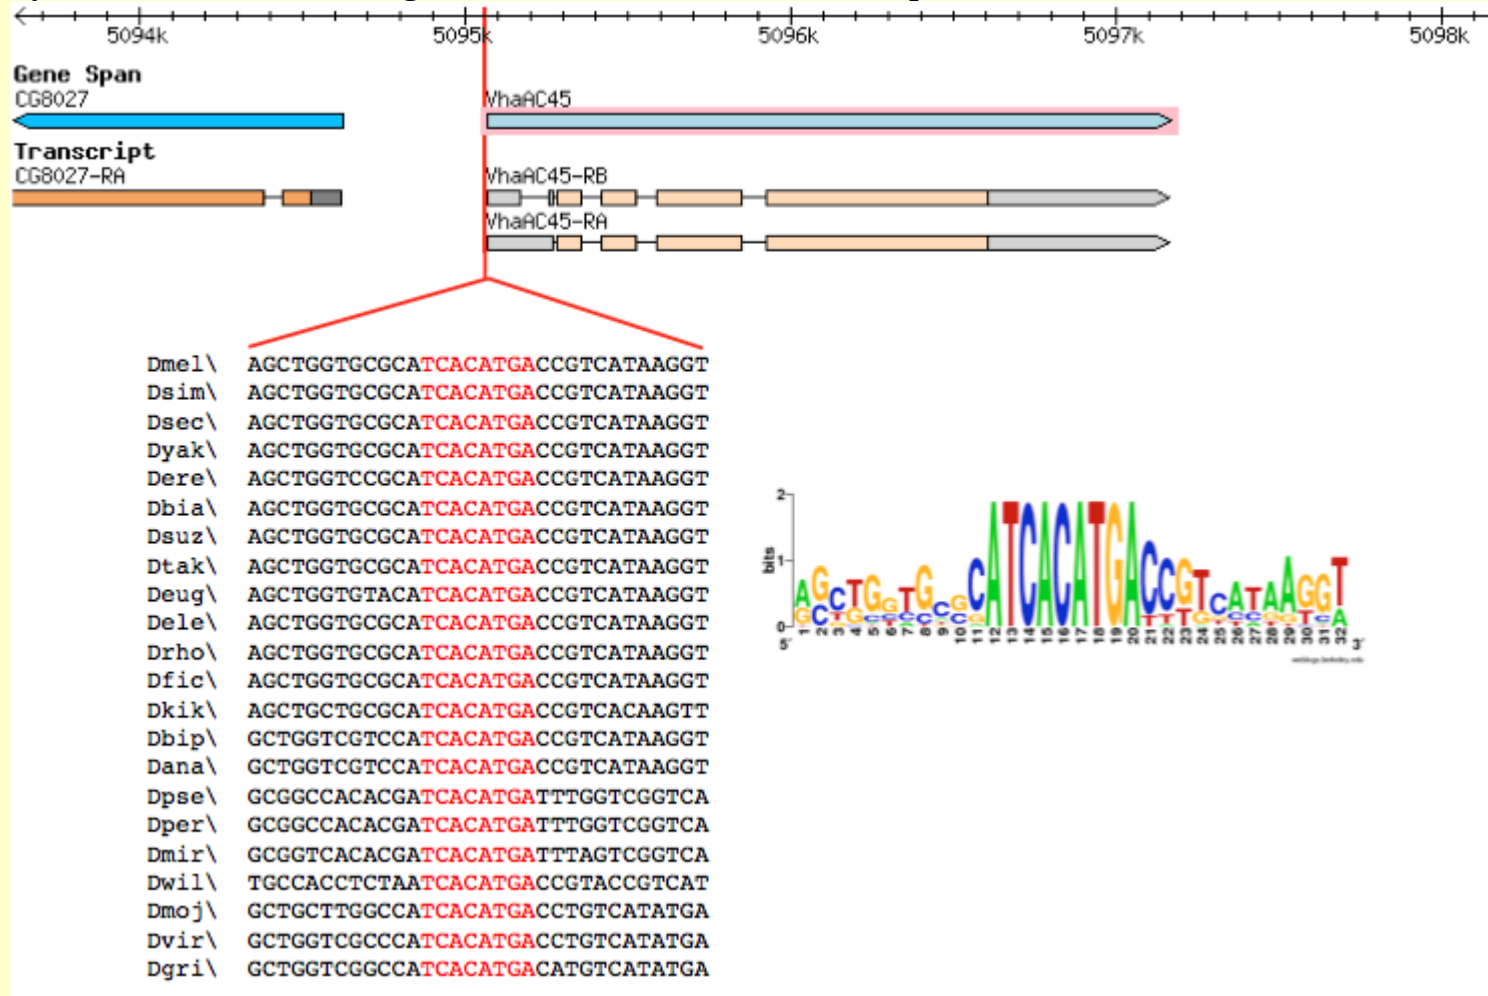

VhaAC45 (CG8029) gene structure comparison in Drosophila species:

Key: UTR region, CDS region

| Species                        | VhaAC45<br>Atp6ap1<br>orthologs | 5'exon |    | intron | exon | intron | exon | intron | exon3' |     |  | Extended CLEAR region           | Position | bps<br>from<br>TSS |
|--------------------------------|---------------------------------|--------|----|--------|------|--------|------|--------|--------|-----|--|---------------------------------|----------|--------------------|
| <i>Drosophila_melanogaster</i> | <a href="#">Dmel\VhaAC45</a>    | 203    | 86 | 63     | 103  | 66     | 262  | 72     | 689    | 559 |  | agctggtgcgaTCACATGAccgtcataaggt | 5'       | -4                 |
| <i>Drosophila_simulans</i>     | <a href="#">Dsim\GD10644</a>    |        | 86 | 63     | 103  | 65     | 262  | 73     | 689    |     |  | agctggtgcgaTCACATGAccgtcataaggt | 5'       | >-206              |
| <i>Drosophila_sechellia</i>    | <a href="#">Dsec\GM21109</a>    |        | 86 | 63     | 103  | 65     | 262  | 73     | 689    |     |  | agctggtgcgaTCACATGAccgtcataaggt | 5'       | >-206              |

|                                 |                              |  |    |    |     |     |     |     |     |  |                                  |    |       |
|---------------------------------|------------------------------|--|----|----|-----|-----|-----|-----|-----|--|----------------------------------|----|-------|
| <i>Drosophila_yakuba</i>        | <a href="#">Dyak\GE19265</a> |  | 86 | 63 | 103 | 63  | 262 | 73  | 689 |  | agctggtgcgcaTCACATGAccgtcataaggt | 5' | >-206 |
| <i>Drosophila_erecta</i>        | <a href="#">Dere\GG23426</a> |  | 86 | 62 | 103 | 63  | 262 | 62  | 689 |  | agctggtccgcaTCACATGAccgtcataaggt | 5' | >-206 |
| <i>Drosophila_biarmipes</i>     | <a href="#">Dbia\VhaAC45</a> |  | 86 | 62 | 103 | 63  | 262 | 61  | 695 |  | agctggtgcgcaTCACATGAccgtcataaggt | 5' | >-208 |
| <i>Drosophila_suzukii</i>       | <a href="#">Dsuz\VhaAC45</a> |  | 86 | 71 | 103 | 71  | 262 | 74  | 695 |  | agctggtgcgcaTCACATGAccgtcataaggt | 5' | >-208 |
| <i>Drosophila_takahashii</i>    | <a href="#">Dtak\VhaAC45</a> |  | 86 | 61 | 103 | 80  | 262 | 71  | 695 |  | agctggtgcgcaTCACATGAccgtcataaggt | 5' | >-202 |
| <i>Drosophila_ficusphila</i>    | <a href="#">Dfic\VhaAC45</a> |  | 86 | 63 | 103 | 66  | 262 | 64  | 695 |  | agctggtgcgcaTCACATGAccgtcataaggt | 5' | >-205 |
| <i>Drosophila_eugracilis</i>    | <a href="#">Deug\VhaAC45</a> |  | 86 | 72 | 103 | 82  | 262 | 64  | 677 |  | agctggtgtacaTCACATGAccgtcataaggt | 5' | >-203 |
| <i>Drosophila_elegans</i>       | <a href="#">Dele\VhaAC45</a> |  | 86 | 74 | 103 | 71  | 262 | 71  | 695 |  | agctggtgcgcaTCACATGAccgtcataaggt | 5' | >-205 |
| <i>Drosophila_rhopaloea</i>     | <a href="#">Drho\VhaAC45</a> |  | 86 | 68 | 103 | 68  | 262 | 63  | 695 |  | agctggtgcgcaTCACATGAccgtcataaggt | 5' | >-203 |
| <i>Drosophila_kikkawai</i>      | <a href="#">Dkik\VhaAC45</a> |  | 86 | 68 | 103 | 63  | 262 | 67  | 695 |  | agctgctgcgcaTCACATGAccgtcacaaggt | 5' | >-189 |
| <i>Drosophila_bipectinata</i>   | <a href="#">Dbip\VhaAC45</a> |  | 86 | 64 | 103 | 55  | 262 | 65  | 686 |  | gctggtcgtccaTCACATGAccgtcataaggt | 5' | >-207 |
| <i>Drosophila_ananassae</i>     | <a href="#">Dana\GF11814</a> |  | 86 | 67 | 103 | 55  | 262 | 65  | 686 |  | gctggtcgtccaTCACATGAccgtcataaggt | 5' | >-207 |
| <i>Drosophila_pseudoobscura</i> | <a href="#">Dpse\GA20777</a> |  | 86 | 62 | 103 | 67  | 262 | 62  | 701 |  | gcggccacacgaTCACATGAtttggtcgtca  | 5' | >-197 |
| <i>Drosophila_persimilis</i>    | <a href="#">Dper\GL17578</a> |  | 86 | 62 | 103 | 67  | 262 | 62  | 701 |  | gcggccacacgaTCACATGAtttggtcgtca  | 5' | >-197 |
| <i>Drosophila_miranda</i>       | <a href="#">Dmir\VhaAC45</a> |  | 86 | 62 | 103 | 67  | 262 | 62  | 701 |  | gcggtcacacgaTCACATGAtttagtcgtca  | 5' | >-237 |
| <i>Drosophila_willistoni</i>    | <a href="#">Dwil\GK17837</a> |  | 89 | 74 | 103 | 376 | 274 | 55  | 704 |  | tgccacctctaaTCACATGAccgtaccgtcat | 5' | >-223 |
| <i>Drosophila_albomicans</i>    |                              |  |    |    |     |     |     |     |     |  |                                  |    |       |
| <i>Drosophila_mojavensis</i>    | <a href="#">Dmoj\GI20366</a> |  | 86 | 71 | 103 | 69  | 262 | 70  | 713 |  | gctgcttgcccaTCACATGAcctgtcatatga | 5' | >-212 |
| <i>Drosophila_virilis</i>       | <a href="#">Dvir\GJ22093</a> |  | 86 | 58 | 103 | 66  | 262 | 66  | 719 |  | gctggtcgcccaTCACATGAcctgtcatatga | 5' | >-216 |
| <i>Drosophila_grimshawi</i>     | <a href="#">Dgri\GH21865</a> |  | 86 | 68 | 103 | 132 | 265 | 436 | 695 |  | gctggtcgcccaTCACATGAcctgtcatatga | 5' | >-216 |
