# Supplementary material for: Structural and Comparative Analyses of Insects Suggest the Presence of an Ultra-Conserved Regulatory Element of the Genes Encoding Vacuolar-Type ATPase Subunits and Assembly Factors
Source: MDPI journal article supplement (doi:10.3390/biology12081127), 2023-08-13
Supplement: s1 [file s1]

|                                     |                                                                          |
|-------------------------------------|--------------------------------------------------------------------------|
| Gene Cluster ID                     | Atp6v1F                                                                  |
| <b>Drosophila melanogaster gene</b> | <b>Vha14-1 (CG8210)</b>                                                  |
| FlyBase ID                          | <a href="#">FBgn0262512</a>                                              |
| <b>Predicted function</b>           | <b>ATPase, H<sup>+</sup> transporting, lysosomal 14kDa, V1 subunit F</b> |
| Protein size                        | 124 amino acids                                                          |
| Cytogenetic map                     | 2R:52B5-52B2                                                             |
| Gene sequence location              | <a href="#">2R:11566931..11567585</a> [-]                                |
| <b>Dmel CLEAR sequence</b>          | <b>TCATGTGA</b>                                                          |
| CLEAR sequence location             | 2R:11567581..11567588                                                    |
| Drosophila paralog                  | <a href="#">Vha14-2 (CG1076)</a>                                         |

**FlyBase Vha14-1 (CG8210) gene model & CLEAR element (red) positions:**

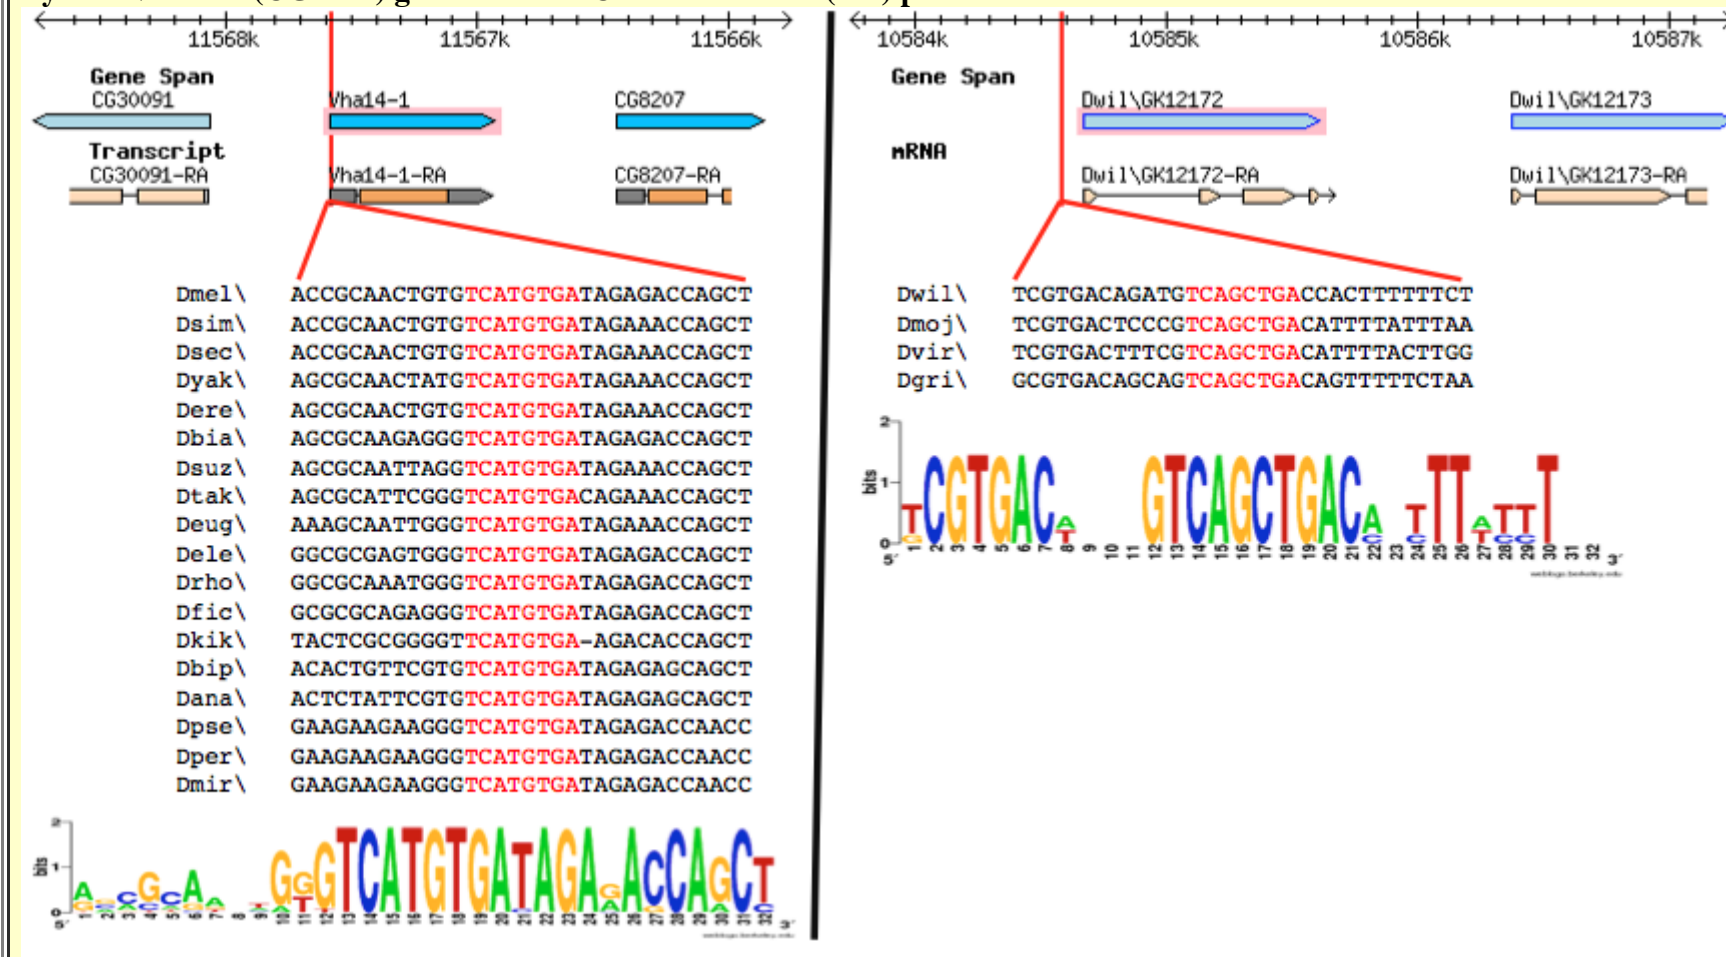

### Atp6v1F gene structure comparison:

Key: UTR region, CDS region

| Species                        | Atp6v1F orthologs            | 5'exon | intron | exon | intron | exon | intron | exon3' | Extended CLEAR region | Position                         | bps from TSS |    |
|--------------------------------|------------------------------|--------|--------|------|--------|------|--------|--------|-----------------------|----------------------------------|--------------|----|
| <i>Drosophila_melanogaster</i> | <a href="#">Dmel\Vha14-1</a> | 98     | 375    |      |        |      |        |        | 182                   | accgcaactgtgTCATGTGAtagagaccagct | 5'           | -3 |
| <i>Drosophila_simulans</i>     | <a href="#">Dsim\GD25605</a> | ND     | 375    |      |        |      |        |        | ND                    | accgcaactgtgTCATGTGAtagaaccagct  | 5'           |    |

|                                 |                              |    |     |      |    |      |     |    |    |     |                                  |    |  |
|---------------------------------|------------------------------|----|-----|------|----|------|-----|----|----|-----|----------------------------------|----|--|
| <i>Drosophila_sechellia</i>     | <a href="#">Dsec\GM20126</a> | ND | 375 |      |    |      |     |    |    | ND  | accgcaactgtgTCATGTGAtagaaaccagct | 5' |  |
| <i>Drosophila_yakuba</i>        | <a href="#">Dyak\GE14140</a> | ND | 375 |      |    |      |     |    |    | ND  | agcgcaactatgTCATGTGAtagaaaccagct | 5' |  |
| <i>Drosophila_erecta</i>        | <a href="#">Dere\GG22339</a> | ND | 375 |      |    |      |     |    |    | ND  | agcgcaactgtgTCATGTGAtagaaaccagct | 5' |  |
| <i>Drosophila_biarmipes</i>     | <a href="#">Dbia\Vha14-1</a> | ND | 375 |      |    |      |     |    |    | ND  | agcgcaagagggTCATGTGAtagagaccagct | 5' |  |
| <i>Drosophila_suzukii</i>       | <a href="#">Dsuz\Vha14-1</a> | ND | 375 |      |    |      |     |    |    | ND  | agcgcaattaggTCATGTGAtagaaaccagct | 5' |  |
| <i>Drosophila_takahashii</i>    | <a href="#">Dtak\Vha14-1</a> | ND | 375 |      |    |      |     |    |    | ND  | agcgcatcgggTCATGTGAcagaaaccagct  | 5' |  |
| <i>Drosophila_eugracilis</i>    | <a href="#">Deug\Vha14-1</a> | ND | 375 |      |    |      |     |    |    | ND  | aaagcaattgggTCATGTGAtagaaaccagct | 5' |  |
| <i>Drosophila_elegans</i>       | <a href="#">Dele\Vha14-1</a> | ND | 375 |      |    |      |     |    |    | ND  | ggcgcgagtgTCATGTGAtagagaccagct   | 5' |  |
| <i>Drosophila_rhopaloea</i>     | <a href="#">Drho\Vha14-1</a> | ND | 375 |      |    |      |     |    |    | ND  | ggcgcaaatgggTCATGTGAtagagaccagct | 5' |  |
| <i>Drosophila_ficusphila</i>    | <a href="#">Dfic\Vha14-1</a> | ND | 375 |      |    |      |     |    |    | ND  | gcgcgcagagggTCATGTGAtagagaccagct | 5' |  |
| <i>Drosophila_kikkawai</i>      | <a href="#">Dkik\Vha14-1</a> | ND | 375 |      |    |      |     |    |    | ND  | ctactcgcgggtTCATGTGAagaccagct    | 5' |  |
| <i>Drosophila_bipunctata</i>    | <a href="#">Dbip\Vha14-1</a> | ND | 375 |      |    |      |     |    |    | ND  | acactgttcgtTCATGTGAtagagaccagct  | 5' |  |
| <i>Drosophila_ananassae</i>     | <a href="#">Dana\GF13376</a> | ND | 375 |      |    |      |     |    |    | ND  | actctattcgtTCATGTGAtagagaccagct  | 5' |  |
| <i>Drosophila_pseudoobscura</i> | <a href="#">Dpse\Vha14-1</a> | ND | 375 |      |    |      |     |    |    | ND  | gaagaagaaggTCATGTGAtagagaccaacc  | 5' |  |
| <i>Drosophila_persimilis</i>    | <a href="#">Dper\GL11862</a> | ND | 375 |      |    |      |     |    |    | ND  | gaagaagaaggTCATGTGAtagagaccaacc  | 5' |  |
| <i>Drosophila_miranda</i>       | <a href="#">Dmir\Vha14-1</a> | ND | 375 |      |    |      |     |    |    | ND  | gaagaagaaggTCATGTGAtagagaccaacc  | 5' |  |
| <i>Drosophila_willistoni</i>    | <a href="#">Dwil\GK12172</a> | ND | 54  | 407  | 82 | 90   | 206 | 60 | 33 | ND  | tcgtgacagatTCAGCTGAccatttttct    | 5' |  |
| <i>Drosophila_albomicans</i>    | <a href="#">Dalb\Vha14-1</a> | ND | ND  | ND   | 82 | 320  | 206 | 57 | 33 | ND  | ND                               |    |  |
| <i>Drosophila_mojavensis</i>    | <a href="#">Dmoj\GI23969</a> | ND | 54  | 210  | 82 | 698  | 206 | 64 | 33 | ND  | tcgtgactccgTCAGCTGAcattttattaa   | 5' |  |
| <i>Drosophila_virilis</i>       | <a href="#">Dvir\GJ22513</a> | ND | 54  | 101  | 82 | 8390 | 206 | 57 | 33 | ND  | tcgtgacttcgTCAGCTGAcattttacttgg  | 5' |  |
|                                 | <a href="#">Dvir\GJ10919</a> | ND | 375 |      |    |      |     |    |    | ND  | tcgtgacttcgTCAGCTGAcattttgcttgg  | 5' |  |
| <i>Drosophila_grimshawi</i>     | <a href="#">Dgri\GH22329</a> | ND | 54  | 1903 | 82 | 385  | 206 | 67 | 33 | ND  | gcgtgacagcagTCAGCTGAcagttttctaa  | 5' |  |
|                                 |                              |    |     |      |    |      |     |    |    |     |                                  |    |  |
| Paralog: Vha14-2 (CG1076)       |                              |    |     |      |    |      |     |    |    |     |                                  |    |  |
| <i>Drosophila_melanogaster</i>  | Dmel\Vha14-2(RB)             | 65 | 54  | 62   | 82 | 119  | 206 | 58 | 33 | 152 |                                  |    |  |
| <i>Drosophila_simulans</i>      | <a href="#">Dsim\GD19837</a> | ND | 54  | 56   | 82 | 89   | 206 | 58 | 33 | ND  |                                  |    |  |
| <i>Drosophila_sechellia</i>     | <a href="#">Dsec\GM10855</a> | ND | 54  | 56   | 82 | 89   | 206 | 58 | 33 | ND  |                                  |    |  |

|                                 |                               |    |     |    |    |      |     |    |    |    |  |  |  |
|---------------------------------|-------------------------------|----|-----|----|----|------|-----|----|----|----|--|--|--|
| <i>Drosophila_yakuba</i>        | <a href="#">Dyak\GE10180</a>  | ND | 54  | 56 | 82 | 66   | 206 | 58 | 33 | ND |  |  |  |
| <i>Drosophila_erecta</i>        | <a href="#">Dere\GG13113</a>  | ND | 54  | 58 | 82 | 110  | 206 | 58 | 33 | ND |  |  |  |
| <i>Drosophila_biarmipes</i>     | <a href="#">Dbia\Vha14-2</a>  | ND | 54  | 59 | 82 | 181  | 206 | 59 | 33 | ND |  |  |  |
| <i>Drosophila_suzukii</i>       | <a href="#">Dsuz\Vha14-2</a>  | ND | 54  | 59 | 82 | 164  | 206 | 64 | 33 | ND |  |  |  |
| <i>Drosophila_takahashii</i>    | <a href="#">Dtak\Vha14-2</a>  | ND | 54  | 57 | 82 | 3977 | 206 | 67 | 33 | ND |  |  |  |
| <i>Drosophila_eugracilis</i>    | <a href="#">Deug\Vha14-2</a>  | ND | 54  | 66 | 82 | 51   | 206 | 59 | 33 | ND |  |  |  |
| <i>Drosophila_elegans</i>       | <a href="#">Dele\Vha14-2</a>  | ND | 54  | 55 | 82 | 199  | 206 | 55 | 33 | ND |  |  |  |
| <i>Drosophila_rhopaloea</i>     | <a href="#">Drho\Vha14-2</a>  | ND | 54  | 56 | 82 | 1049 | 206 | 55 | 33 | ND |  |  |  |
| <i>Drosophila_ficusphila</i>    | <a href="#">Dfic\Vha14-2</a>  | ND | 54  | 52 | 82 | 133  | 206 | 55 | 33 | ND |  |  |  |
| <i>Drosophila_kikkawai</i>      | <a href="#">Dkik\Vha14-2</a>  | ND | 75? | 48 | 82 | 54   | 206 | 58 | 33 | ND |  |  |  |
| <i>Drosophila_bipectinata</i>   | <a href="#">Dbip\Vha14-2</a>  | ND | 54  | 51 | 82 | 59   | 206 | 60 | 33 | ND |  |  |  |
| <i>Drosophila_ananassae</i>     | <a href="#">Dana\GF16369*</a> | ND | 54  | 53 | 82 | 59   | 206 | 58 | 33 | ND |  |  |  |
| <i>Drosophila_pseudoobscura</i> | <a href="#">Dpse\GA26491</a>  | ND | 54  | 51 | 82 | 64   | 206 | 59 | 33 | ND |  |  |  |
| <i>Drosophila_persimilis</i>    | <a href="#">Dper\GL24046</a>  | ND | ND  | ND | ND | 64   | 206 | 59 | 33 | ND |  |  |  |
| <i>Drosophila_miranda</i>       | <a href="#">Dmir\Vha14-2</a>  | ND | 54  | 51 | 82 | 64   | 206 | 59 | 33 | ND |  |  |  |
| <i>Drosophila_willistoni</i>    | <a href="#">Dwil\GK13026*</a> | ND | 54  | 55 | 82 | 57   | 206 | 63 | 33 | ND |  |  |  |
| <i>Drosophila_albomicans</i>    | <a href="#">Dalb\Vha14-2</a>  | ND | 54  | 53 | 82 | 58   | 206 | 63 | 33 | ND |  |  |  |
| <i>Drosophila_mojavensis</i>    | <a href="#">Dmqj\GI24384*</a> | ND | 54  | 62 | 82 | 85   | 206 | 59 | 33 | ND |  |  |  |
| <i>Drosophila_virilis</i>       | <a href="#">Dvir\GJ14239*</a> | ND | 54  | 79 | 82 | 76   | 206 | 62 | 33 | ND |  |  |  |
| <i>Drosophila_grimshawi</i>     | <a href="#">Dgrl\GH14013*</a> | ND | 54  | 67 | 82 | 49   | 206 | 65 | 33 | ND |  |  |  |

Key: UTR region, CDS region
