# Supplementary material for: Structural and Comparative Analyses of Insects Suggest the Presence of an Ultra-Conserved Regulatory Element of the Genes Encoding Vacuolar-Type ATPase Subunits and Assembly Factors
Source: MDPI journal article supplement (doi:10.3390/biology12081127), 2023-08-13
Supplement: s1 [file s1]

Mrot\ GAAAGGAAGTTGTCACGTGACGTCTGTCATATGATTCTAGTCAGGT  
 Hsal\ GAAATGTACCAATCACGTGATATATATCATATGATCGCGAGAAGAT  
 Lhum\ GAAGTGCATCGGCCACGTGACATGTGTCATATGATCGCGGGCAGTC  
 Cflo\ GAAATGCATCGACCATGTGATCACAATCATATGATCAGGAGGTGGT  
 Aech\ GAAGTGCATCGGCCACGTGATGCGAATCAGCGTCACGAGGTAATAG  
 Acep\ GAAGTGCATCGGTTCACGTGATGCGAATCGGCGTCACGAGGTAACAG  
 Sinv\ GAAGTGTATCGGCCACGTGACACAGAGTCGGCGTCACGACTGTCA  
 Pbar\ GAAATCAGCCCGCACGTGATACGAGACGTACACGATCACGAGGG

5' / 5' UTR

Phum\ ttcctttgaacaTCATGTGcaatttacttct  
 Lful\ cgattgtactgaTCACATGAttgcatgtgatg  
 Dpul\ gcaccgtctgtgTCATGTGAtgaaaatttctg

### Atp6ap1 gene structure comparisons:

(Click on orthologs for genomic, mRNA and protein sequence informations)

Key: UTR region, CDS region

| Order                   | Species                          | Atp6ap1 orthologs                                          | 5'exon |     | intron | exon | intron | exon | intron | exon3' |     | Extended CLEAR region                                                | Position                                                            | bps from TSS  |                |
|-------------------------|----------------------------------|------------------------------------------------------------|--------|-----|--------|------|--------|------|--------|--------|-----|----------------------------------------------------------------------|---------------------------------------------------------------------|---------------|----------------|
| Diptera (Drosophilidae) | <i>Drosophila_melanogaster</i>   | <a href="#">Dmel\VhaAC45</a>                               | 203    | 86  | 63     | 103  | 66     | 262  | 72     | 689    |     | 559                                                                  | agctggtgcgcaTCACATGAccgtcataaggt                                    | 5'            | -4             |
| Diptera (Muscidae)      | <i>Musca_domestica</i>           | <a href="#">Mdom\Atp6ap1</a>                               |        | 86  | 69     | 103  | 343    | 265  | 63     | 698    |     |                                                                      | atcgctctgtcaTCACATGActgattcaagat<br>actgattcaagaTCATATGAatacgaagaat | 5'<br>5'      | >-230<br>>-211 |
| Diptera ( Tephritidae)  | <i>Ceratitis_capitata</i>        | <a href="#">Ccap\Atp6ap1</a>                               |        | 80  | 58     | 103  | 66     | 271  | 63     | 710    |     | 250                                                                  | aattcgaatataTCACATGActgtcatgagca                                    | 5'            | >-187          |
| Diptera (Glossinidae)   | <i>Glossina_morsitans</i>        | <a href="#">Gmor\Atp6ap1</a>                               | 124    | 89  | 53     | 103  | 56     | 265  | 58     | 698    |     | 475                                                                  | tatttttctaaTCACATGAcagtcatacgcg                                     | 5'            | -57            |
| Diptera (Psychodidae)   | <i>Lutzomyia_longipalpis</i>     | <a href="#">Llon\Atp6ap1</a>                               | 111    | 98  | 72     | 1087 |        |      |        |        |     | gattcatcgcaaTCACATGAcaaacatcgaaa                                     | 5'                                                                  | -4            |                |
|                         | <i>Phlebotomus_papatasi</i>      | <a href="#">Ppap\Atp6ap1</a>                               | 48     | 98  | 55     | 1087 |        |      |        |        | 132 | aaaaacatcgaaTCATATGAcacagagaatc                                      | 5'                                                                  | -59           |                |
|                         |                                  |                                                            |        |     |        |      |        |      |        |        |     |                                                                      |                                                                     |               |                |
| Diptera (Culicidae)     | <i>Anopheles_gambiae</i>         | <a href="#">Agam\Atp6ap1</a><br><a href="#">AGAP003879</a> | 117    | 101 | 67     | 1066 |        |      |        |        | 161 | gttcgtaaacagTCAGGTGAcacaaaaagtgc<br>gatgactttgcgTCACATGAtgcgtcatcga  | 5'UTR<br>exon2                                                      | 16<br>626     |                |
|                         | <i>Anopheles_arabiensis</i>      | <a href="#">Aara\Atp6ap1</a>                               |        | 101 | 67     | 1066 |        |      |        |        |     | gttcgtaaacagTCAGGTGAcacaaaaagtgc<br>gatgactttgcgTCACATGAtgctctcatcga | 5'<br>exon2                                                         | >-96<br>>509  |                |
|                         | <i>Anopheles_quadriannulatus</i> | <a href="#">Aqan\Atp6ap1</a>                               |        | 101 | 67     | 1066 |        |      |        |        |     | gttcgtaaacagTCAGGTGAcacaaaaagtgc<br>gatgactttgcgTCACATGAtgctctcatcga | 5'<br>exon2                                                         | >-91<br>>509  |                |
|                         | <i>Anopheles_christyi</i>        | <a href="#">Achr\Atp6ap1</a>                               |        | 101 | 85     | 1066 |        |      |        |        |     | gttcgtaaacagTCAGGTGAtagaaaaaacg<br>ggtgactttgcgTCACATGAtgcgtcatcga   | 5'<br>exon2                                                         | >-96<br>>527  |                |
|                         | <i>Anopheles_epiroticus</i>      | <a href="#">Aepi\Atp6ap1</a>                               |        | 104 | 111    | 1060 |        |      |        |        |     | gttcgtaaacagTCAGGTGAcagagaaagggc<br>gatgactttgcgTCACATGAcgccttgatcga | 5'<br>exon2                                                         | >-95<br>>556  |                |
|                         | <i>Anopheles_minimus</i>         | <a href="#">Amin\Atp6ap1</a>                               |        | 104 | 72     | 1066 |        |      |        |        |     | tacgtaccagttTCATATGAtttgtatttt<br>tttcgtaaacagTCAGGTGAtagctagagcga   | 5'<br>5'                                                            | >-524<br>>-91 |                |

|                            |                             |                                                              |     |                                       |     |      |     |      |                                 |     |                                                                                                       |                        |                                                                                                     |                                                                   |                    |                                                |        |                                                |           |       |       |
|----------------------------|-----------------------------|--------------------------------------------------------------|-----|---------------------------------------|-----|------|-----|------|---------------------------------|-----|-------------------------------------------------------------------------------------------------------|------------------------|-----------------------------------------------------------------------------------------------------|-------------------------------------------------------------------|--------------------|------------------------------------------------|--------|------------------------------------------------|-----------|-------|-------|
|                            |                             |                                                              |     |                                       |     |      |     |      |                                 |     | ggtgatttgcgTCACATGAcgccatcatcga                                                                       | exon2                  | >517                                                                                                |                                                                   |                    |                                                |        |                                                |           |       |       |
|                            | <i>Anopheles_funestus</i>   | <a href="#">Afun\Atp6ap1</a>                                 |     | 104                                   | 74  | 1066 |     |      |                                 |     | tttcgtaaacagTCAGGTGAttagcaaaagcg<br>ggtgatttcgcgTCACATGAtgccgtcatcga                                  | 5'<br>exon2            | >-90<br>>519                                                                                        |                                                                   |                    |                                                |        |                                                |           |       |       |
|                            | <i>Anopheles_stephensi</i>  | <a href="#">Aste\Atp6ap1</a>                                 | 51  | 104                                   | 67  | 1063 |     |      |                                 | 115 | tttcgtaaacagTCAGGTGAtagccacattc<br>ggtgatttgcgTCACATGAcgccatcatcga                                    | 5'<br>exon2            | -42<br>586                                                                                          |                                                                   |                    |                                                |        |                                                |           |       |       |
|                            | <i>Anopheles_dirus</i>      | <a href="#">Adir\Atp6ap1</a>                                 |     | 101                                   | 94  | 1060 |     |      |                                 |     | ttcgtaaaaagTCAGGTGAtaggaagaaaa<br>ggtgacttgcgTCACATGAcacctcatcgg                                      | 5'<br>exon2            | >-91<br>>536                                                                                        |                                                                   |                    |                                                |        |                                                |           |       |       |
|                            | <i>Anopheles_nili</i>       | <a href="#">Anil\Atp6ap1</a>                                 |     | 101                                   | 82  | 1072 |     |      |                                 |     | tgcctgaccgtgTCAGGTGAttcgtctcgcga<br>ttcctgcaagtTCACATGAcgacgtgctcga<br>ggtgacttgcgTCACATGAtgcgtcatcga | 5'<br>intron1<br>exon2 | >-94<br>>145<br>>524                                                                                |                                                                   |                    |                                                |        |                                                |           |       |       |
|                            | <i>Anopheles_albimanus</i>  | <a href="#">Aalb\Atp6ap1</a>                                 |     | 98                                    | 79  | 1093 |     |      |                                 |     | ggcgattacgcaTCACATGAcgtctgatcga                                                                       | exon2                  | >518                                                                                                |                                                                   |                    |                                                |        |                                                |           |       |       |
|                            | <i>Anopheles_darlingi</i>   | <a href="#">Adar\Atp6ap1</a>                                 |     | 98                                    | 78  | 1093 |     |      |                                 |     | ggcgattacgcaTCACATGAtccctgatcga                                                                       | exon2                  | >517                                                                                                |                                                                   |                    |                                                |        |                                                |           |       |       |
|                            | <i>Aedes_aegypti</i>        | <a href="#">Aaeg\Atp6ap1</a><br><a href="#">AAEL007777</a>   | 164 | 92                                    | 127 | 109  | 324 | 966  |                                 |     |                                                                                                       | 139                    | aatcgaatcgtTCACGTGAaggaagcaagt<br>ggcgggacgaggTCATGTGAtgtccttacgt<br>aatgatttgcgTCACATGAtgcgtcatcga | 5'UTR<br>intron1<br>exon2                                         | 135<br>335<br>1054 |                                                |        |                                                |           |       |       |
|                            | <i>Culex_pipiens_qui.</i>   | <a href="#">Cpip\Atp6ap1</a>                                 |     | 110                                   | 59  | 1066 |     |      |                                 |     | atcgtcattgcgTCAGTGAgtcagtacgag<br>ggagtgaagggTCATGTGAtgtttgttttc<br>gacgacttgcgTCACATGAcgtttgatcga    | 5'<br>intron1<br>exon2 | >-130<br>>144<br>>516                                                                               |                                                                   |                    |                                                |        |                                                |           |       |       |
|                            |                             |                                                              |     |                                       |     |      |     |      |                                 |     |                                                                                                       |                        |                                                                                                     |                                                                   |                    |                                                |        |                                                |           |       |       |
| Diptera<br>(Cecidomyiidae) | <i>Mayetiola_destructor</i> | <a href="#">Mdes\Atp6ap1</a>                                 |     | 1224                                  |     |      |     |      | gcattgtcaaaaTCACTTGActttgggcccc |     |                                                                                                       |                        | 5'                                                                                                  | >-110                                                             |                    |                                                |        |                                                |           |       |       |
| Lepidoptera                | <i>Bombyx_mori</i>          | <a href="#">Bmor\Atp6ap1</a>                                 | 132 | 826                                   |     |      |     | 2037 | 164                             | 955 | 219                                                                                                   |                        |                                                                                                     |                                                                   | 99                 | cgtaacgtgaaTCATATGAtcactttTCACATGAccgatggctact | 5'UTR? | -15                                            |           |       |       |
|                            | <i>Manduca sexta</i>        | <a href="#">Msex\Atp6ap1</a>                                 | 77  | 808                                   |     |      |     | 1403 | 161                             | 347 | 219                                                                                                   |                        |                                                                                                     |                                                                   |                    | gcgtcaagtaaTCATATGAtcattttTCACATGAccgatggttagt | 5'     | -24                                            |           |       |       |
|                            | <i>Danaus_plexippus</i>     | <a href="#">Dple\Atp6ap1</a>                                 |     | 817                                   |     |      |     | 897  | 167                             | 139 | 219                                                                                                   |                        |                                                                                                     |                                                                   |                    | cgtaacgtgaaTCATATGAtcactttTCACATGAccgatggctact | 5'     | >-101                                          |           |       |       |
|                            | <i>Heliconius_melpomene</i> | <a href="#">Hmel\Atp6ap1</a>                                 |     | 817                                   |     |      |     | 522  | 155                             | 323 | 219                                                                                                   |                        |                                                                                                     |                                                                   |                    | gcgtcaagtaaTCATATGAtcactttTCACATGAccaatggttctt | 5'     | >-109                                          |           |       |       |
|                            | <i>Plutella_xylostella</i>  | <a href="#">Pxyl\Atp6ap1</a>                                 | 86  | 691                                   |     |      |     | ND   | 138                             | 610 | 128                                                                                                   | ND                     | 213                                                                                                 |                                                                   |                    |                                                |        | caagcgtaaaaTCATATGAtcattttTCACATGAcccgtgtcaaat | 5'        | >-111 |       |
|                            |                             |                                                              |     |                                       |     |      |     |      |                                 |     |                                                                                                       |                        |                                                                                                     |                                                                   |                    |                                                |        |                                                |           |       |       |
| Coleoptera                 | <i>Tribolium_castaneum</i>  | <a href="#">Tcas\Atp6ap1</a><br><a href="#">LOC663029</a>    |     | 17+156+112+50+271+49+86+51+263+53+193 |     |      |     | 45   | 207                             |     |                                                                                                       |                        | 273                                                                                                 | tactcccaaaTCACGTGAtcttgtaaaagt<br>gggcactcgaagTCATATGActtggttcagg |                    |                                                |        | 5'<br>intron1                                  | 36<br>323 |       |       |
|                            |                             |                                                              |     |                                       |     |      |     |      |                                 |     |                                                                                                       |                        |                                                                                                     |                                                                   |                    |                                                |        |                                                |           |       |       |
| Hymenoptera                | <i>Apis_mellifera</i>       | <a href="#">Ame\Atp6ap1</a><br><a href="#">GB16678</a>       | 138 | 273                                   |     |      |     | 87   | 351                             | 80  | 549                                                                                                   |                        |                                                                                                     |                                                                   | 372                | gaaacaatgtaTCACGTGAcgtttgTCATATGAttctagtctagg  |        |                                                |           | 5'UTR | 40/54 |
|                            | <i>Apis_florea</i>          | <a href="#">Aflo\Atp6ap1</a>                                 |     | 273                                   |     |      |     | 87   | 351                             | 74  | 558                                                                                                   |                        |                                                                                                     |                                                                   |                    | gaaacaatgtaTCACGTGAcgtttgTCATATGAttctagtctagg  |        |                                                |           | 5'    | >-89  |
|                            | <i>Bombus_terrestris</i>    | <a href="#">Bter\Atp6ap1</a><br><a href="#">LOC100646562</a> |     | 267                                   |     |      |     | 87   | 357                             | 87  | 573                                                                                                   |                        |                                                                                                     |                                                                   |                    | gaaacaaagttaTCACGTGAcgtctgTCATATGAttctagcctagt |        |                                                |           | 5'    | >-98  |
|                            | <i>Bombus_impatiens</i>     | <a href="#">Bimp\Atp6ap1</a>                                 |     | 267                                   |     |      |     | 87   | 357                             | 87  | 573                                                                                                   |                        |                                                                                                     |                                                                   |                    | gaaacaaagttaTCACGTGAcgtctgTCATATGAttctagcctagt |        |                                                |           | 5'    | >-98  |
|                            | <i>Megachile_rotundata</i>  | <a href="#">Mrot\Atp6ap1</a>                                 |     | 270                                   |     |      |     | 84   | 360                             | 67  | 552                                                                                                   |                        |                                                                                                     |                                                                   |                    | gaaaggaagttgTCACGTGAcgtctgTCATATGAttctagtcaggt |        |                                                |           | 5'    | >-98  |
|                            | <i>Acromyrmex_echinator</i> | <a href="#">Aech\Atp6ap1</a>                                 |     | 276                                   |     |      |     | 1148 | 291                             | 204 | 513                                                                                                   |                        |                                                                                                     |                                                                   |                    | gaagtgcacggCCACGTGAtcggaatcagcg                |        |                                                |           | 5'    | >-130 |
|                            | <i>Atta_cephalotes</i>      | <a href="#">Acep\Atp6ap1</a>                                 |     | 285                                   |     |      |     | 1104 | 303                             | 203 | 525                                                                                                   |                        |                                                                                                     |                                                                   |                    | gaagtgcacggTCACGTGAtcggaatcggcg                |        |                                                |           | 5'    | >-130 |

|              |                              |                                               |     |     |     |     |      |     |     |     |     |                          |  |                                                                    |          |                |                                 |                                |       |       |
|--------------|------------------------------|-----------------------------------------------|-----|-----|-----|-----|------|-----|-----|-----|-----|--------------------------|--|--------------------------------------------------------------------|----------|----------------|---------------------------------|--------------------------------|-------|-------|
|              | <i>Solenopsis_invicta</i>    | <a href="#">Sin\Atp6ap1</a>                   |     | 279 | 498 | 303 | 391  | 528 |     |     |     |                          |  | gaagtgtatcggCCACGTGAcacacgagtcgg                                   | 5'       | >-131          |                                 |                                |       |       |
|              | <i>Camponotus_floridanus</i> | <a href="#">Cflo\Atp6ap1</a>                  |     | 282 | 130 | 306 | 202  | 534 |     |     |     |                          |  | attaaagattatTCATGTGActttataacaa<br>atgtgactcacaTCATATGAtcagaggtggt | 5'<br>5' | >-193<br>>-107 |                                 |                                |       |       |
|              | <i>Harpegnathos_saltator</i> | <a href="#">Hsal\Atp6ap1</a>                  |     | 285 | 414 | 309 | 217  | 528 |     |     |     |                          |  | gaaatgtaccaTCACGTGAtatataTCATATGAtcgcgagaagat                      | 5'       | >-100          |                                 |                                |       |       |
|              | <i>Pogonomyrmex_barbatus</i> | <a href="#">Pbar\Atp6ap1</a>                  |     | 279 | 493 | 303 | 102  | 528 |     |     |     |                          |  | gaaatcagcccGCCACGTGAtacgagacgtca                                   | 5'       | >-117          |                                 |                                |       |       |
|              | <i>Linepithema_humile</i>    | <a href="#">Lhum\Atp6ap1</a>                  |     | 288 | 345 | 306 | 120  | 528 |     |     |     |                          |  | gaagtgcacggCCACGTGAcattgtTCATATGAtcgcgggcagtc                      | 5'       | >-93           |                                 |                                |       |       |
|              | <i>Nasonia_vitripennis</i>   |                                               |     |     |     |     |      |     |     |     |     |                          |  |                                                                    |          |                |                                 |                                |       |       |
|              | <i>Nasonia_giraulti</i>      |                                               |     |     |     |     |      |     |     |     |     |                          |  |                                                                    |          |                |                                 |                                |       |       |
|              | <i>Nasonia_longicornis</i>   |                                               |     |     |     |     |      |     |     |     |     |                          |  |                                                                    |          |                |                                 |                                |       |       |
|              |                              |                                               |     |     |     |     |      |     |     |     |     |                          |  |                                                                    |          |                |                                 |                                |       |       |
| Odonata      | <i>Ladona_fulva</i>          | <a href="#">Lful\Atp6ap1</a>                  |     | 960 |     |     |      | 375 | 198 | 75  | 225 |                          |  |                                                                    |          |                | cgattgtactgaTCACATGAttgcattgatg | 5'UTR?                         | >-10  |       |
|              |                              |                                               |     |     |     |     |      |     |     |     |     |                          |  |                                                                    |          |                |                                 |                                |       |       |
| Hemiptera    | <i>Acyrtosiphon_pisum</i>    | <a href="#">Apis\Atp6ap1<br/>LOC100169264</a> | 146 | 241 |     |     | 1030 | 518 | 60  | 267 | ND  | 213                      |  |                                                                    |          |                |                                 | ccttgacgaTCACGTGAatcattgctt    | exon3 | 2010  |
|              | <i>Rhodnius_prolixus</i>     |                                               |     |     |     |     |      |     |     |     |     | 210                      |  |                                                                    |          |                |                                 |                                |       |       |
| Phthiraptera | <i>Pediculus_humanus</i>     | <a href="#">Phum\Atp6ap1<br/>PHUM457150</a>   |     | 238 | 95  | 318 | 76   | 200 | 74  | 195 | 114 | 210                      |  |                                                                    |          |                |                                 | ttccttgaacaTCATGTGAcaatttactct | 5'    | >-113 |
| Crustacea    | <i>Daphnia_pulex</i>         | <a href="#">Dpul\Atp6ap1</a>                  |     | 104 | 104 | 106 | 60   | 265 | 63  | 86  | 58  | 176+63+153+84+288+71+169 |  |                                                                    |          |                |                                 | gcaccgtctgtTCATGTGAtgaaaattctg | 5'    | >-79  |
| Aracnida     | <i>Ixodes_scapularis</i>     |                                               |     |     |     |     |      |     |     |     |     |                          |  |                                                                    |          |                |                                 |                                |       |       |
|              |                              |                                               |     |     |     |     |      |     |     |     |     |                          |  |                                                                    |          |                |                                 |                                |       |       |
|              |                              |                                               |     |     |     |     |      |     |     |     |     |                          |  |                                                                    |          |                |                                 |                                |       |       |
