# Supplementary material for: Structural and Comparative Analyses of Insects Suggest the Presence of an Ultra-Conserved Regulatory Element of the Genes Encoding Vacuolar-Type ATPase Subunits and Assembly Factors
Source: MDPI journal article supplement (doi:10.3390/biology12081127), 2023-08-13
Supplement: s1 [file s1]

|                              |                                                                                    |
|------------------------------|------------------------------------------------------------------------------------|
| Gene Cluster ID              | Atp6v1B                                                                            |
| Drosophila melanogaster gene | Vha55 (CG17369)                                                                    |
| FlyBase ID                   | <a href="#">FBgn0005671</a>                                                        |
| Predicted function           | ATPase, H <sup>+</sup> transporting, lysosomal 56/58kDa, V1 subunit B              |
| Protein size                 | 490 amino acids                                                                    |
| Cytogenetic map              | 3R:87C2-87C3                                                                       |
| Gene sequence location       | <a href="#">3R:8449484..8453551</a> [-]                                            |
| Dmel CLEAR sequence(s)       | TCATGTGA; TCACATGA; TCAGCTGA; TCATGTGA                                             |
| CLEAR sequence location(s)   | 3R:8453499..8453506; 3R:8452843..8452850; 3R:8452492..8452499; 3R:8452403..8452410 |

FlyBase Vha55 (CG17369) gene model & CLEAR element (red) positions:

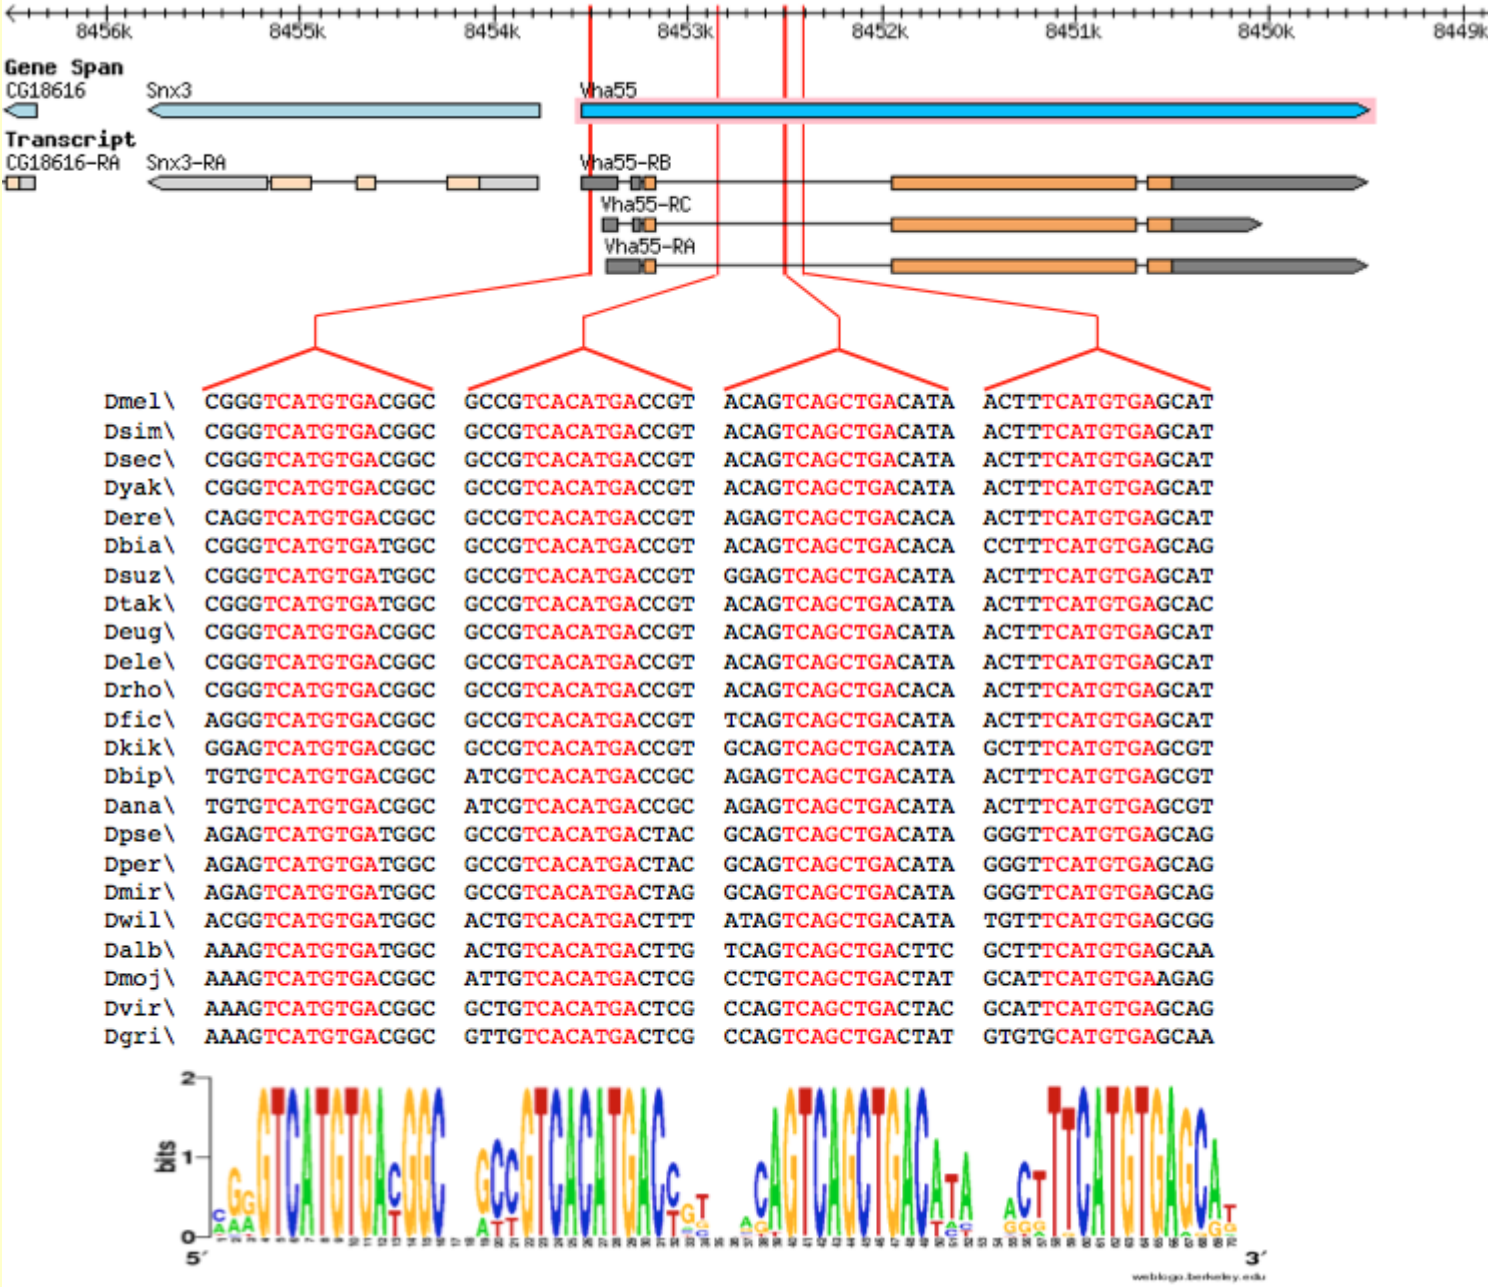

## Atp6v1B gene structure comparison:

Key: UTR region, CDS region

| Species                        | Atp6v1B orthologs            | 5'exon |    | intron | exon | intron | exon3' |      | Extended CLEAR region                                                                                                                       | Position                                | bps from TSS              |
|--------------------------------|------------------------------|--------|----|--------|------|--------|--------|------|---------------------------------------------------------------------------------------------------------------------------------------------|-----------------------------------------|---------------------------|
| <i>Drosophila_melanogaster</i> | <a href="#">Dmel\Vha55</a>   | 308    | 73 | 1221   | 1262 | 61     | 138    | 1005 | acgcgtgacgggTCATGTGAcggcacgtgacg<br>aaatttcgccgTCACATGAcggttcgctgct<br>ccagttggacagTCAGCTGAcataatttagcc<br>agattccgactTCATGTGAgcattgcgcgac  | 5'UTR<br>intron1<br>intron1<br>intron1  | 45<br>701<br>1052<br>1141 |
| <i>Drosophila_simulans</i>     | <a href="#">Dsim\GD20555</a> |        | 73 | 1224   | 1262 | 67     | 138    |      | acgcgtggcgggTCATGTGAcggcacgtgacg<br>aaatttcgccgTCACATGAcggttcgctgct<br>ccagttggacagTCAGCTGAcataatttacc<br>agattccgactTCATGTGAgcattgcgcgac   | 5'UTR?<br>intron1<br>intron1<br>intron1 |                           |
| <i>Drosophila_sechellia</i>    | <a href="#">Dsec\GM25995</a> |        | 73 | 1243   | 1262 | 64     | 138    |      | acgcgtggcgggTCATGTGAcggcacgtgacg<br>aaatttcgccgTCACATGAcggttcgctgct<br>ccagttggacagTCAGCTGAcataatttacc<br>agattccgactTCATGTGAgcattgcgcgac   | 5'UTR?<br>intron1<br>intron1<br>intron1 |                           |
| <i>Drosophila_yakuba</i>       | <a href="#">Dyak\GE24501</a> |        | 73 | 1346   | 1262 | 60     | 138    |      | acgcgtggcgggTCATGTGAcggcacgtgacg<br>aaatttcgccgTCACATGAcggttcgctgct<br>ccagttgacagTCAGCTGAcataatttacc<br>agattccgactTCATGTGAgcattgcgcgac    | 5'UTR?<br>intron1<br>intron1<br>intron1 |                           |
| <i>Drosophila_erecta</i>       | <a href="#">Dere\GG17111</a> |        | 73 | 1320   | 1262 | 60     | 138    |      | acgcgtgtcaggTCATGTGAcggcacgtgacg<br>aaatttcgccgTCACATGAcggttcgctgct<br>ccagttggagagTCAGCTGAcacaatttacc<br>agattccgactTCATGTGAgcattgcgcgac   | 5'UTR?<br>intron1<br>intron1<br>intron1 |                           |
| <i>Drosophila_biarmipes</i>    | <a href="#">Dbia\Vha55</a>   |        | 73 | 1561   | 1262 | 60     | 138    |      | acgcctggcgggTCATGTGAtggcacgtgacg<br>aaatttcgccgTCACATGAcggttcgctgct<br>ccagttggacagTCAGCTGAcacaattaccct<br>agattccccctTCATGTGAgcagtgccgcgac | 5'UTR?<br>intron1<br>intron1<br>intron1 |                           |
| <i>Drosophila_suzukii</i>      | <a href="#">Dsuz\Vha55</a>   |        | 73 | 1525   | 1262 | 59     | 138    |      | acgcctggcgggTCATGTGAtggcacgtgacg<br>aaatttcgccgTCACATGAcggttgctgct<br>aaccagttggagTCAGCTGAcataatttacc<br>agattcctactTCATGTGAgcattgcgcgac    | 5'UTR?<br>intron1<br>intron1<br>intron1 |                           |
| <i>Drosophila_takahashii</i>   | <a href="#">Dtak\Vha55</a>   |        | 73 | 1613   | 1262 | 63     | 138    |      | aacgcctggcgggTCATGTGAtggcacgtgac<br>aaatttcgccgTCACATGAcggttcgctgct<br>ccagttgacagTCAGCTGAcataatttacc<br>agattcctactTCATGTGAgcactgcgcgac    | 5'UTR?<br>intron1<br>intron1<br>intron1 |                           |
| <i>Drosophila_eugracilis</i>   | <a href="#">Deug\Vha55</a>   |        | 73 | 1515   | 1262 | 59     | 138    |      | acgcctgacgggTCATGTGAcggcacgtgacg<br>aaatttcgccgTCACATGAcggttcgctgct<br>ccagttggacagTCAGCTGAcataatttagcc<br>agattcccactTCATGTGAgcattgcgcgac  | 5'UTR?<br>intron1<br>intron1<br>intron1 |                           |
| <i>Drosophila_elegans</i>      | <a href="#">Dele\Vha55</a>   |        | 73 | 1645   | 1262 | 67     | 138    |      | gcgctggcgggTCATGTGAcggcacgtgacg<br>aaatttcgccgTCACATGAcggttcgctgct<br>ccagttgacagTCAGCTGAcataattttcc<br>agattctactTCATGTGAgcattgcgcgac      | 5'UTR?<br>intron1<br>intron1<br>intron1 |                           |

|                                 |                              |           |    |      |                 |    |     |      |                                                                                                                                           |                                         |                         |
|---------------------------------|------------------------------|-----------|----|------|-----------------|----|-----|------|-------------------------------------------------------------------------------------------------------------------------------------------|-----------------------------------------|-------------------------|
| <i>Drosophila_rhopaloea</i>     | <a href="#">Drho\Vha55</a>   |           | 73 | 1596 | 1262            | 58 | 138 |      | gcgcctgacgggTCATGTGAcggcacgtgacg<br>aaatttcgccgTCACATGAcggttcgctgct<br>ccagttggacagTCAGCTGAcacaatttacc<br>agattctaactTCATGTGAgcattgcgcgac | 5'UTR?<br>intron1<br>intron1<br>intron1 |                         |
| <i>Drosophila_ficusphila</i>    | <a href="#">Dfic\Vha55</a>   |           | 73 | 1385 | 1262            | 59 | 138 |      | gcgcctcaaggTCATGTGAcggcacgtgacg<br>aaatttcgccgTCACATGAcggttcgacgt<br>ccagttggtcagTCAGCTGAcataattacca<br>agattcctactTCATGTGAgcattgcgagac   | 5'UTR?<br>intron1<br>intron1<br>intron1 |                         |
| <i>Drosophila_kikkawai</i>      | <a href="#">Dkik\Vha55</a>   |           | 73 | 1272 | 1400 (1262+138) |    |     |      | acgcctggggagTCATGTGAcggcacgtgacg<br>aaatttcgccgTCACATGAcggttcgctcag<br>ccagttgggcagTCAGCTGAcataattaccg<br>aaattctcgtTCATGTGAgcgttcgcgcgac | 5'UTR?<br>intron1<br>intron1<br>intron1 |                         |
| <i>Drosophila_bipectinata</i>   | <a href="#">Dbip\Vha55</a>   |           | 73 | 1028 | 1262            | 68 | 138 |      | ctgtcgctgtgTCATGTGAcggcacgtgacg<br>aaatttcacgcTCACATGAcggttagtctct<br>cgagtcggagagTCAGCTGAcatacttctccc<br>agcttctactTCATGTGAgcgttcgcgcgac | 5'UTR?<br>intron1<br>intron1<br>intron1 |                         |
| <i>Drosophila_ananassae</i>     | <a href="#">Dana\GF23001</a> |           | 73 | 1070 | 1262            | 70 | 138 |      | ctgtcgctgtgTCATGTGAcggcacgtgacg<br>aaatttcacgcTCACATGAcggttagtctct<br>caagtcggagagTCAGCTGAcataattgccc<br>aacttctactTCATGTGAgcgttcgcgcgac  | 5'UTR?<br>intron1<br>intron1<br>intron1 |                         |
| <i>Drosophila_pseudoobscura</i> | <a href="#">Dpse\GA14484</a> | 133+68+86 | 73 | 835  | 1262            | 67 | 138 | 1176 | acaaccctagagTCATGTGAtggcacgtgacg<br>aaatttcgccgTCACATGActaccatagatc<br>ccagttgggcagTCAGCTGAcataagttcccc<br>ttccaaggggTCATGTGAgcaggcggccta | 5'UTR?<br>intron1<br>intron1<br>intron1 | 0<br>649<br>960<br>1043 |
| <i>Drosophila_persimilis</i>    | <a href="#">Dper\GL13570</a> |           | 73 | 835  | 1262            | 67 | 138 |      | acaaccctagagTCATGTGAtggcacgtgacg<br>aaatttcgccgTCACATGActaccatagatc<br>ccagttgggcagTCAGCTGAcataagttcccc<br>ttccaaggggTCATGTGAgcaggcggccta | 5'UTR?<br>intron1<br>intron1<br>intron1 |                         |
| <i>Drosophila_miranda</i>       | <a href="#">Dmir\Vha55</a>   |           | 73 | 828  | 1262            | 67 | 138 |      | acaaccctagagTCATGTGAtggcacgtgacg<br>aaatttcgccgTCACATGActagcatagatc<br>ccagttgggcagTCAGCTGAcataagttcccc<br>ttccaaggggTCATGTGAgcaggcggccta | 5'UTR?<br>intron1<br>intron1<br>intron1 |                         |
| <i>Drosophila_willistoni</i>    | <a href="#">Dwil\GK13566</a> |           | 73 | 789  | 1262            | 57 | 138 |      | gcaaccctacggTCATGTGAtggcacgtgacg<br>aaatttcactgTCACATGActttgtgtgtg<br>gctcgtggatagTCAGCTGAcataatttacc<br>actggttgtgtTCATGTGAgcgttagaatcc  | 5'UTR?<br>intron1<br>intron1<br>intron1 |                         |
| <i>Drosophila_albomicans</i>    | <a href="#">Dalb\Vha55</a>   |           | 73 | 959  | 1262            | 62 | 138 |      | tcacacgcaaagTCATGTGAtggcacgtgacg<br>aaatttcactgTCACATGActtgatcgctga<br>ttcgttcgtcagTCAGCTGActcgttgagtt<br>tggtgttctTCATGTGAgcaacgcttga    | 5'UTR?<br>intron1<br>intron1<br>intron1 |                         |
| <i>Drosophila_mojavensis</i>    | <a href="#">Dmoj\GI24752</a> |           | 73 | 847  | 1262            | 68 | 138 |      | tcacacgtaaagTCATGTGAcggcacgtgacg<br>aaatttcattgTCACATGActgatcatcaa<br>ccagttgcctgTCAGCTGActatttaacccc<br>ccaactgtgcatTCATGTGAgagcgcctattt | 5'UTR?<br>intron1<br>intron1<br>intron1 |                         |
| <i>Drosophila_virilis</i>       | <a href="#">Dvir\GJ14577</a> |           | 73 | 847  | 1262            | 68 | 138 |      | tcacacgcaaagTCATGTGAcggcacgtgacg<br>aaatttcgctgTCACATGActgatcgccga<br>gcagttggcagTCAGCTGActacttaacccc<br>gccggttgcatTCATGTGAgcagcgttattg  | 5'UTR?<br>intron1<br>intron1<br>intron1 |                         |

|                             |                              |  |    |     |      |    |     |  |                                                                                                          |                                         |  |
|-----------------------------|------------------------------|--|----|-----|------|----|-----|--|----------------------------------------------------------------------------------------------------------|-----------------------------------------|--|
| <i>Drosophila_grimshawi</i> | <a href="#">Dgri\GH18893</a> |  | 73 | 862 | 1262 | 86 | 138 |  | tcacacgcaaagTCATGTGAcggcacgtgacg<br>aaattttcgttgTCACATGActcgatcgctga<br>ctggtttgccagTCAGCTGActatttaaccct | 5'UTR?<br>intron1<br>intron1<br>intron1 |  |
|                             |                              |  |    |     |      |    |     |  |                                                                                                          |                                         |  |
|                             |                              |  |    |     |      |    |     |  |                                                                                                          |                                         |  |
|                             |                              |  |    |     |      |    |     |  |                                                                                                          |                                         |  |
