# Supplementary material for: Structural and Comparative Analyses of Insects Suggest the Presence of an Ultra-Conserved Regulatory Element of the Genes Encoding Vacuolar-Type ATPase Subunits and Assembly Factors
Source: MDPI journal article supplement (doi:10.3390/biology12081127), 2023-08-13
Supplement: s1 [file s1]

| Gene Cluster ID                     | Atp6ap2                                                             |                                                      |                                           |
|-------------------------------------|---------------------------------------------------------------------|------------------------------------------------------|-------------------------------------------|
| Drosophila melanogaster gene        | VhaM8.9 (CG8444)                                                    |                                                      |                                           |
| FlyBase ID                          | <a href="#">FBgn0037671</a>                                         |                                                      |                                           |
| Predicted function                  | ATPase, H+ transporting, lysosomal accessory protein 2              |                                                      |                                           |
| Atp6v1H CLEAR element conservation: |                                                                     |                                                      |                                           |
|                                     | 5' / 5' UTR                                                         | 5' / 5' UTR                                          |                                           |
| Dmel\                               | CAACCCTGTTCA <b>TCACATGA</b> TAGTCAGGGTGA                           | TGCAGTCGTTTCG <b>TCATATGA</b> TTAAAAGTCCAG           |                                           |
| Mdom\                               | TCTCTCTTTACA <b>TCATGTGA</b> CCAAATGCAACC                           | GTTTGTCGATTG <b>TCATATGA</b> TCACGAACAAAA            |                                           |
|                                     | 5' / 5' UTR                                                         |                                                      |                                           |
| Ccap\                               | CCGTCCGAGT <b>TTGT</b> TCATATGATCAATTTTCATT                         |                                                      |                                           |
| Gmor\                               | TC <b>TAGCCGTT</b> <b>TTGT</b> TCATATGATCAATTT <b>TGAT</b>          |                                                      |                                           |
| Llon\                               | AGACAC <b>CTTTGG</b> TCATATGATTTTAG <b>TGTGAG</b>                   |                                                      |                                           |
| Ppap\                               | CT <b>TGGGCGAT</b> <b>TTGT</b> TCATATGATTTTAC <b>TGTGAA</b>         |                                                      |                                           |
|                                     | 5' / 5' UTR                                                         | 5' / 5' UTR                                          | intron1                                   |
| Agam\                               | <b>CTGCGCAAAGTGT</b> TCACGTGAGGAACGGGACGG                           | ACCACAAT <b>TAACGT</b> TCATATGAT <b>CACA</b> AGTGCAA | <b>TCTCATCG-CTGTT</b> TCACATGACATGAAGTATC |
| Aara\                               | <b>CTGCGCAAAGTGT</b> TCACGTGAGGAACGGGACGG                           | ACCACAAT <b>TAACGT</b> TCATATGAT <b>CACA</b> AGTGCAA | <b>TCTCATCG-CTTTT</b> TCACATGACATGAAGTATC |
| Aqan\                               | <b>CTGCGCAAAGTGT</b> TCACGTGAGGAACGGGACGG                           | ACCACAAT <b>TAACGT</b> TCATATGAT <b>CACA</b> AGTGCAA | <b>TCTCATCG-CTGTT</b> TCACATGACATGAAGTATC |
| Achr\                               | <b>CTGCGCAAAGTGT</b> TCACGTGAGGAACGGAGTCG                           | ACCACAAT <b>TAACGT</b> TCATATGAT <b>CACA</b> AGTGCAA | <b>TCCCTGTG-CAGTT</b> TCACATGACATAAAATAC  |
| Amin\                               | <b>CTGCGCAAAGTGT</b> TCACGTGAGGAACGGAATGG                           | AACACAAT <b>TAACGT</b> TCATATGAT <b>CACA</b> AGTGCAA | <b>TCTCATCGTCTGTT</b> TCACATGACAACGAAAAGG |
| Afun\                               | <b>CTGCACAAAGTGT</b> TCACGTGAGGAACGGAATGG                           | AACACAAT <b>TAACGT</b> TCATATGAT <b>CACA</b> AGTGCAA | -----                                     |
| Aste\                               | <b>CTGCGCAAAGTGT</b> TCACGTGAGGAACGCAGTGG                           | AACACAAT <b>TAACGT</b> TCATATGAT <b>CACA</b> AGTGCAA | -----                                     |
| Aepi\                               | <b>CTGCAGTAAGTGT</b> TCACGTGAGGAACAAGGTGG                           | ACCACAAT <b>TAACGT</b> TCATATGAT <b>CACA</b> AGTGCAA | -----                                     |
| Adir\                               | -----                                                               | AACAGAAAAA <b>AGT</b> TCATATGACCA <b>ACT</b> CGGTCA  | -----                                     |
| Anil\                               | -----                                                               | ACGACAAAAA <b>ACGT</b> TCATATGAT <b>CACA</b> AGTGCAA | -----                                     |
| Aalb\                               | CCCGT <b>CCAAACGT</b> TCACGTGAGGCGCTCCA <b>AAAC</b>                 | GCGCTCC <b>AAACGT</b> TCATATGAT <b>CAAA</b> ATTCAGA  | -----                                     |
| Adar\                               | CCCGTT <b>CAAACGT</b> TCACGTGAGGCGCTCCA <b>AAAC</b>                 | GCGCTCC <b>AAACGT</b> TCATATGAT <b>CAAA</b> AATCAGA  | -----                                     |
| Aaeg\                               | AA <b>ACT</b> CG <b>AAAGT</b> TCACGTGAGG <b>AC</b> CATATCG          | AAAT <b>CGGGAACGT</b> TCATATGAT <b>CACT</b> GGTGCAA  | -----                                     |
| Cqui\                               | -----                                                               | AAAGTG <b>AAAACGT</b> TCATATGAT <b>CACT</b> GGGTGCA  | -----                                     |
| Mdes\                               | TGTGCTGTG <b>ATGT</b> TCACGTGAATGTTTCGA <b>AAAC</b>                 | AATCATAGT <b>ACAT</b> TCATATGAT <b>CT</b> TGGCTTTAGT |                                           |
| Bmor\                               | <b>GTATGAATTTAAT</b> TCATATGACAT <b>TGT</b> GATTGT                  |                                                      |                                           |
| Dple\                               | <b>GTAA</b> CACTTT <b>AAT</b> TCATATGACAG <b>TAG</b> CCACC          |                                                      |                                           |
| Hmel\                               | <b>GCAAT</b> ACTTT <b>AAT</b> TCATATGACAG <b>TCAG</b> CTACT         |                                                      |                                           |
| Msex\                               | <b>GTAAG</b> ACTTT <b>AAT</b> TCATATGACAG <b>TCAG</b> TCA <b>TT</b> |                                                      |                                           |
| Pxyl\                               | <b>GCAAC</b> ACTGA <b>AAT</b> TCATATGACAG <b>CT</b> GCCATT          |                                                      |                                           |
|                                     | 5' / 5' UTR                                                         | 5' / 5' UTR                                          |                                           |
| Tcas\                               | GTCACAAGACTG <b>TCATATGA</b> TTATGACATTTG                           | GTTAGTTT <b>TAATGT</b> TCATATGAC <b>TTCAA</b> ATTTCC |                                           |
|                                     | 5' / 5' UTR                                                         |                                                      |                                           |
| Amel\                               | ATTACATTAAT <b>GT</b> TCATATGAT <b>TCAG</b> TTGTG <b>AA</b>         |                                                      |                                           |
| Aflo\                               | ATTACGTTAAT <b>GT</b> TCATATGAT <b>TCAG</b> TTGTG <b>AA</b>         |                                                      |                                           |
| Bter\                               | ACTCCTTT <b>GTGG</b> TCATATGAT <b>TCAG</b> TTGTG <b>AA</b>          |                                                      |                                           |
| Bimp\                               | ACTCCTTT <b>GTGG</b> TCATATGAT <b>TCAG</b> TTGTG <b>AA</b>          |                                                      |                                           |
| Mrot\                               | TGGATTAGCGT <b>GT</b> TCATATGATA <b>AACT</b> TATAG <b>A</b>         |                                                      |                                           |
| Nvit\                               | GTG <b>CAAAAGGT</b> TCATATGAT <b>TCG</b> GACGAA <b>AAA</b>          |                                                      |                                           |
| Nlon\                               | GTG <b>CAAAAGGT</b> TCATATGAT <b>TCG</b> GACGAA <b>AAA</b>          |                                                      |                                           |
| Ngir\                               | GTG <b>CAAAAGGT</b> TCATATGAT <b>TCG</b> GACGAA <b>AAA</b>          |                                                      |                                           |

Aech\ CATCTGACATGATC**CACATGAT**TCACGTCCGAAA  
 Lhum\ CATCTGATGTGATC**CACATGAT**TCGCGTCCGAAA  
 Sinv\ TACCTGACATGATC**CATATGAT**TCGCGTCTGAAA  
 Pbar\ TG**TCTGACATAATC**CACATGATCGCGTCTGAAA  
 Cflo\ GAT**TCTGAAGTAT**CACATGATCATGTCCGAAA  
 Hsal\ GACCACAGGTGATC**CACATGAT**TCATGTCCGAAT  
 Acep\ TAT**CTGACATGAT**CACATGATCCGAAATTGAT  
  
 Lful\ catatcgtctggt**TCATATGA**ttctttaagcgaa  
 Dpul\ agcacgaacaca**TCACCTGA**cttttagctgtca

## Atp6ap2 gene structure comparisons:

(Click on Species for genomic, mRNA and protein sequence informations)

Key: UTR region, CDS region

| Order                   | Species                          | Atp6ap2 orthologs         | 5'exon |        | intron | exon |    | intron | exon3' |     |     |    | Extended CLEAR region | Position                                                             | bps from TSS                                                                                            |                                  |                 |      |
|-------------------------|----------------------------------|---------------------------|--------|--------|--------|------|----|--------|--------|-----|-----|----|-----------------------|----------------------------------------------------------------------|---------------------------------------------------------------------------------------------------------|----------------------------------|-----------------|------|
| Diptera (Drosophilidae) | <i>Drosophila_melanogaster</i>   | DmelVhaM8.9               | 84     | 43     | 223    | 353  |    | 262    | 567    |     |     |    | 421                   | caacctgttcaTCACATGAtagtcagggtga<br>tgcagtcgttcgTCATATGAttaaaagtccag  | 5' 5'UTR                                                                                                | -1 52                            |                 |      |
| Diptera (Muscidae)      | <i>Musca_domestica</i>           | MdomAtp6ap2               |        | 43     | 260    | 731  |    |        |        | 747 | 183 |    |                       | tctctctttacaTCATGTGAccaaatgcaacc<br>gtttgtcgattgTCATATGAtcacgaacaaaa | 5' 5'                                                                                                   | >-93 >-13                        |                 |      |
| Diptera (Tephritidae)   | <i>Ceratitis_capitata</i>        | CcapAtp6ap2               |        | 43     | 218    | 353  |    | 64     | -      | -   | 249 |    | 56                    | 186                                                                  | 285                                                                                                     | ccgtcgcagttgTCATATGAtcaattttcatt | 5'UTR?          | >-37 |
| Diptera (Glossinidae)   | <i>Glossina_morsitans</i>        | GmorAtp6ap2               | 60     | 43     | 149    | 356  |    | 1905   | 378    |     |     | 60 | 186                   | 236                                                                  | tctagccgtttgTCATATGAtcaattttgat                                                                         | 5'                               | -3              |      |
| Diptera (Psychodidae)   | <i>Lutzomyia_longipalpis</i>     | LlonAtp6ap2               | 52     | 43     | 141    | 341  |    | 58     | 138    | 59  | 246 |    | 433                   | 189                                                                  | 246                                                                                                     | agacacctttggTCATATGAttttagtggag  | 5'UTR           | 3    |
|                         | <i>Phlebotomus_papatasi</i>      | PpapAtp6ap2               | 56     | 43[-]? | ND     | 344  |    | 58     | 138    | 55  | 246 |    | ND                    | 189                                                                  | 226                                                                                                     | cttgggcgattgTCATATGAttttactgtgaa | 5'UTR           | 14   |
|                         |                                  |                           |        |        |        |      |    |        |        |     |     |    |                       |                                                                      |                                                                                                         |                                  |                 |      |
| Diptera (Culicidae)     | <i>Anopheles_gambiae</i>         | AgamAtp6ap2<br>AGAP003430 |        | 43     | 214    | 224  | 81 | 519    |        |     |     | 80 | 189                   | 584                                                                  | ctgcgcaaaagtTCACGTGAggaacgggacgg<br>accacaataacgTCATATGAtcacaagtgc<br>tctcatcgctgtTCACATGAcatagaagtatcg | 5' 5'UTR? intron1                | -35 18 278      |      |
|                         | <i>Anopheles_arabiensis</i>      | AaraAtp6ap2               |        | 43     | 214    | 224  | 87 | 519    |        |     |     | 80 | 189                   |                                                                      | ctgcgcaaaagtTCACGTGAggaacgggacgg<br>accacaataacgTCATATGAtcacaagtgc<br>tctcatcgctttTCACATGAcatagaagtatcg | 5' 5'UTR? intron1                | >-108 >-47 >206 |      |
|                         | <i>Anopheles_quadriannulatus</i> | AqanAtp6ap2               |        | 43     | 214    | 224  | 81 | 519    |        |     |     | 80 | 189                   |                                                                      | ctgcgcaaaagtTCACGTGAggaacgggacgg<br>accacaataacgTCATATGAtcacaagtgc<br>tctcatcgctgtTCACATGAcatagaagtatcg | 5' 5'UTR? intron1                | >-108 >-47 >206 |      |
|                         | <i>Anopheles_christyi</i>        | AchrAtp6ap2               |        | 43     | 217    | 224  | 83 | 513    |        |     |     | 76 | 189                   |                                                                      | ctgcgcaaaagtTCACGTGAggaacgggacg<br>accacaataacgTCATATGAtcacaagtgc<br>tccctgtgcagtTCACATGAcataaaaatacg   | 5' 5'UTR? intron1                | >-109 >-47 >211 |      |
|                         | <i>Anopheles_epiroticus</i>      | AepiAtp6ap2               |        | 43     | 234    | 224  | 75 | 516    |        |     |     | 64 | 189                   |                                                                      | ctgcagtaagtTCACGTGAggaacaagtgg<br>accacaataacgTCATATGAtcacaagtgc<br>ctcatcgctgtTCACATGAcacgaaaagga      | 5' 5'UTR? intron1                | >-108 >-47 >218 |      |
|                         | <i>Anopheles_minimus</i>         | AminAtp6ap2               |        | 43     | 196    | 224  | 59 | 513    |        |     |     | 74 | 189                   |                                                                      | ctgcgcaaaagtTCACGTGAggaacggaatg<br>aacacaataacgTCATATGAtcacaagtgc                                       | 5' 5'UTR?                        | >-108 >-47      |      |

|                            |                              |                                                            |    |    |     |     |     |      |       |     |     |      |     |     |      |     |      |     |                                                                        |                                                                     |                                   |                                  |       |     |
|----------------------------|------------------------------|------------------------------------------------------------|----|----|-----|-----|-----|------|-------|-----|-----|------|-----|-----|------|-----|------|-----|------------------------------------------------------------------------|---------------------------------------------------------------------|-----------------------------------|----------------------------------|-------|-----|
|                            | <i>Anopheles_funestus</i>    | <a href="#">Afun\Atp6ap2</a>                               |    | 43 | 216 | 224 | 65  | 516  |       |     |     |      |     |     |      | 79  | 189  |     | ctgcacaaagtgTCACGTGAggaacggaatgg<br>aacacataaacgTCATATGAtcacaaagtgcaa  | 5'<br>5UTR?                                                         | >-107<br>>-47                     |                                  |       |     |
|                            | <i>Anopheles_stephensi</i>   | <a href="#">Aste\Atp6ap2</a>                               |    | 43 | 217 | 224 | 62  | 516  |       |     |     |      |     |     |      | 71  | 189  |     | ctgcgcaaaagtgTCACGTGAggaacgcagtg<br>aacacataaacgTCATATGAtcacaaagtgcaa  | 5'<br>5UTR?                                                         | >-107<br>>-47                     |                                  |       |     |
|                            | <i>Anopheles_dirus</i> A     | <a href="#">Adir\Atp6ap2</a>                               |    | 43 | 237 | 224 | 73  | 516  |       |     |     |      |     |     |      | 78  | 180  |     | aacagaaaaaagTCATATGAccaactcggtca<br>tgaccaactcggTCATATGAcgaagtgcacaaa  | 5'<br>5UTR?                                                         | >-67<br>>-50                      |                                  |       |     |
|                            | <i>Anopheles_nili</i>        | <a href="#">Anil\Atp6ap2</a>                               |    | 43 | 212 | 224 | 65  | 513  |       |     |     |      |     |     |      | 82  | 189  |     | acgacaaaaacgTCATATGAtcacaaagtgcac                                      | 5UTR?                                                               | >-50                              |                                  |       |     |
|                            | <i>Anopheles_albimanus</i>   | <a href="#">Aalb\Atp6ap2</a>                               |    | 43 | 185 | 224 | 67  | 513  |       |     |     |      |     |     |      | 74  | 180  |     | cccgctcaaacgTCACGTGAggcgcgtccaaac<br>gcgctccaaacgTCATATGAtcaaaaattcaga | 5'<br>5UTR?                                                         | >-63<br>>-42                      |                                  |       |     |
|                            | <i>Anopheles_darlingi</i>    | <a href="#">Adar\Atp6ap2</a>                               |    | 43 | 189 | 224 | 60  | 513? |       |     |     |      |     |     |      | 72  | 180  |     | cccggtcaaacgTCACGTGAggcgcgtccaaac<br>gcgctccaaacgTCATATGAtcaaaaattcaga | 5'<br>5UTR?                                                         |                                   |                                  |       |     |
|                            | <i>Aedes_aegypti</i>         | <a href="#">Aaeg\Atp6ap2</a><br><a href="#">AAEL002411</a> |    | 43 | 197 | 224 | 74  | 114  | 16650 | 399 |     |      |     |     |      | 63  | 180  | 421 | aaactcgaaaagTCACGTGAgggaccatattcg<br>aaatcggggaacgTCATATGAtcactggtgcaa | 5'<br>5UTR                                                          | -73<br>15                         |                                  |       |     |
|                            | <i>Culex_pipiens_qui.</i>    | <a href="#">Cqui\Atp6ap2</a><br><a href="#">CPIJ009739</a> |    | 43 | 205 | 224 | 80  | 519  |       |     |     |      |     |     |      | 66  | 180  |     | aaagtgaagTCATATGAtcactgggtgcac                                         | 5UTR?                                                               | -30                               |                                  |       |     |
| Diptera<br>(Cecidomyiidae) | <i>Mayetiola_destructor</i>  | <a href="#">Mdes\Atp6ap2</a>                               | 54 | 43 | 170 | 350 |     |      |       | 95  | 363 |      |     |     |      |     | 104  | 207 |                                                                        | tgtgctgtgatgTCACGTGAatgtttcgaaac<br>aatcatagtacaTCATATGAtctggcttagt | 5'<br>5UTR                        | 24<br>-64                        |       |     |
|                            |                              |                                                            |    |    |     |     |     |      |       |     |     |      |     |     |      |     |      |     |                                                                        |                                                                     |                                   |                                  |       |     |
| Lepidoptera                | <i>Bombyx_mori</i>           | <a href="#">Bmor\Atp6ap2</a>                               |    | 52 | 77  | 131 | 96  | 99   | 165   | 144 | 91  | 141  | 827 | 130 | 422  | 140 | 1453 | 177 | 275                                                                    | gtatgaatttaaTCATATGAcattgtgattgt                                    | 5UTR?                             | -15                              |       |     |
|                            | <i>Manduca sexta</i>         | <a href="#">Msex\Atp6ap2</a>                               |    | 52 | 80  | 131 | 142 | 99   | 321   | 144 | 248 | 141  | 78  | 130 | 360  | 140 | 216  | 174 |                                                                        | gtaagactttaaTCATATGAcagtcagtcatt                                    | 5UTR?                             | >-27                             |       |     |
|                            | <i>Danaus_plexippus</i>      | <a href="#">Dple\Atp6ap2</a>                               |    | 52 | 70  | 131 | 126 | 99   | 178   | 144 | 88  | 141  | 174 | 130 | 353  | 137 | 441  | 174 |                                                                        | gtaacactttaaTCATATGAcagtaagccacc                                    | 5UTR?                             | >-26                             |       |     |
|                            | <i>Heliconius_melpomene</i>  | <a href="#">Hmel\Atp6ap2</a>                               |    | 52 | 71  | 131 | 83  | 99   | 60    | 144 | 77  | 144  | 105 | 130 | 2632 | 137 | 705  | 174 |                                                                        | gcaatactttaaTCATATGAcagtcagctact                                    | 5UTR?                             | >-37                             |       |     |
|                            | <i>Plutella_xylostella</i>   | <a href="#">Pxy\Atp6ap2</a>                                | 15 | 52 | 94  | 131 | 126 | 99   | 334   | 144 | 387 | 135  | 511 | 130 | 378  | 131 | 1417 | 180 | 497                                                                    | gcaacactgaaaTCATATGAcagtctgccatt                                    | 5UTR?                             | >-11                             |       |     |
|                            |                              |                                                            |    |    |     |     |     |      |       |     |     |      |     |     |      |     |      |     |                                                                        |                                                                     |                                   |                                  |       |     |
| Coleoptera                 | <i>Tribolium_castaneum</i>   | <a href="#">LOC662403</a>                                  |    | 43 | 43  | 365 |     |      |       | 46  | 135 | 1537 | 285 |     |      | 50  | 180  | 273 | gtcacaaagactgTCATATGAttagacatttg<br>gttagtttaatgTCATATGActtcaaaattcc   | 5'<br>5UTR                                                          | -20<br>14                         |                                  |       |     |
|                            |                              |                                                            |    |    |     |     |     |      |       |     |     |      |     |     |      |     |      |     |                                                                        |                                                                     |                                   |                                  |       |     |
| Hymenoptera                | <i>Apis_mellifera</i>        | <a href="#">GB17311</a>                                    |    | 43 | 117 | 128 | 175 | 231  |       |     | 380 | 315  |     |     | 100  | 93  | 7467 | 103 | 82                                                                     | 80                                                                  | attacattaatgTCATATGAtcagtttgtgaa  | 5UTR?                            | 1     |     |
|                            | <i>Apis_florea</i>           | <a href="#">Aflo\Atp6ap2</a>                               |    | 43 | 108 | 128 | 180 | 231  |       |     | 253 | 315  |     |     | 111  | 93  | 7469 | 103 | 82                                                                     | 80                                                                  | attacgtttaatgTCATATGAtcagtttgtgaa | 5UTR?                            | >-78  |     |
|                            | <i>Bombus_terrestris</i>     | <a href="#">Bter\Atp6ap2</a>                               |    | 43 | 101 | 128 | 180 | 231  |       |     | 117 | 315  |     |     | 111  | 93  | 4720 | 112 | 90                                                                     | 80                                                                  | actcctttgtggTCATATGAtcagtttgtgaa  | 5UTR?                            | -7    |     |
|                            | <i>Bombus_impatiens</i>      | <a href="#">Bimp\Atp6ap2</a>                               |    | 43 | 101 | 128 | 178 | 231  |       |     | 117 | 315  |     |     | 111  | 93  | 4731 | 112 | 90                                                                     | 80                                                                  | actcctttgtggTCATATGAtcagtttgtgaa  | 5UTR?                            | >-69  |     |
|                            | <i>Megachile_rotundata</i>   | <a href="#">Mrot\Atp6ap2</a>                               |    | 43 | 111 | 128 | 128 | 231  |       |     | 135 | 315  |     |     | 71   | 105 | 3446 | 106 | 74                                                                     | 80                                                                  | tggattagcgtgTCATATGAtaaaacttataga | 5UTR?                            |       |     |
|                            | <i>Acromyrmex_echinator</i>  | <a href="#">AECH19445*</a>                                 |    | 43 | 280 | 131 | 346 | 240  |       |     | 119 | 309  |     |     | 1285 | 87  | 6402 | 109 | 2353                                                                   | 80                                                                  | catctgacatgaTCACATGAtcacgtccgaaa  | 5'                               | >-65  |     |
|                            | <i>Atta_cephalotes</i>       | <a href="#">ACEP24633*</a>                                 |    | 43 | 280 | 134 | 352 | 240  |       |     | 120 | 309  |     |     | 1336 | 87  | 5463 | 109 | ND                                                                     | 80                                                                  | tatctgacatgaTCACATGAtccgaaattgat  | 5UTR?                            | >-60  |     |
|                            | <i>Solenopsis_invicta</i>    | <a href="#">Sinv\Atp6ap2</a>                               |    | 43 | 284 | 128 | 394 | 240  |       |     | 297 | 309  |     |     | 799  | 84  | 5699 | 109 | 1056                                                                   | 80                                                                  | 14                                | tacctgacatgaTCATATGAtcgcgtctgaaa | 5UTR? | -81 |
|                            | <i>Camponotus_floridanus</i> | <a href="#">CFLO15335*</a>                                 |    | 43 | 282 | 128 | 263 | 237  |       |     | 356 | 309  |     |     | 155  | 87  | 2862 | 109 | 433                                                                    | 80                                                                  | gatctgaagttaTCACATGAtcatgtccgaaa  | 5UTR?                            | >-65  |     |
|                            | <i>Harpegnathos_saltator</i> | <a href="#">Hsal\Atp6ap2</a>                               |    | 43 | 427 | 128 | 177 | 240  |       |     | 116 | 309  |     |     | 177  | 93  | 3736 | 109 | 648                                                                    | 80                                                                  | gaccacaggtgaTCACATGAtcatgtccgaat  | 5UTR?                            | >-70  |     |

|              |                              |                              |     |     |     |     |     |            |      |     |     |     |      |     |     |     |      |    |                                  |       |                                   |    |      |
|--------------|------------------------------|------------------------------|-----|-----|-----|-----|-----|------------|------|-----|-----|-----|------|-----|-----|-----|------|----|----------------------------------|-------|-----------------------------------|----|------|
|              | <i>Pogonomyrmex_barbatus</i> | <a href="#">Pbar\Atp6ap2</a> |     | 43  | 320 | 128 | 208 | 240        | 126  | 309 | 485 | 87  | 2782 | 109 | ND  | 80  |      |    | gtgtgcacataaTCACATGAtcgcgtctgaaa | 5UTR? | >-66                              |    |      |
|              | <i>Linepithema_humile</i>    | <a href="#">Lhum\Atp6ap2</a> |     | 43  | 303 | 128 | 288 | 234        | 430  | 306 | 102 | 84  | 2685 | 112 | 307 | 80  |      |    | catctgatgtgaTCACATGAtcgcgtccgaaa | 5UTR? | >-60                              |    |      |
|              | <i>Nasonia_vitripennis</i>   | <a href="#">NV14085</a>      |     | 46  | 108 | 128 | 82  | 231        | 81   | 315 | 72  | 108 | 1095 | 103 | 88  | 80  |      |    | gtgcaaaagggtgTCATATGAtcggacgaaaa | 5UTR? | >-84                              |    |      |
|              | <i>Nasonia_giraulti</i>      | <a href="#">Ngir\Atp6ap2</a> |     | 46  | 139 | 128 | 82  | 231        | 81   | 315 | 72  | 108 | 1102 | 103 | 88  | 80  |      |    | gtgcaaaagggtgTCATATGAtcggacgaaaa | 5UTR? | >-84                              |    |      |
|              | <i>Nasonia_longicornis</i>   | <a href="#">Nlon\Atp6ap2</a> |     | 46  | 139 | 128 | 82  | 231        | 81   | 315 | 72  | 108 | ND   | 103 | 88  | 80  |      |    | gtgcaaaagggtgTCATATGAtcggacgaaaa | 5UTR? | >-84                              |    |      |
|              |                              |                              |     |     |     |     |     |            |      |     |     |     |      |     |     |     |      |    |                                  |       |                                   |    |      |
| Odonata      | <i>Ladona_fulva</i>          | <a href="#">Lful\Atp6ap2</a> |     | 43  | 108 | 128 | 166 | 241        | 1031 | 152 | 83  | 108 | 289  | 109 | 73  | 80  |      |    | catatcgtctggTCATATGAtttctaagcgaa | 5UTR? | >-40                              |    |      |
|              |                              |                              |     |     |     |     |     |            |      |     |     |     |      |     |     |     |      |    |                                  |       |                                   |    |      |
| Hemiptera    | <i>Acyrtosiphon_pisum</i>    | <a href="#">ACYPI007940</a>  | 176 | 52  | 148 | 137 | 441 | 240        | 62   | 132 | 224 | 180 | 694  | 75  | 82  | 103 | 1872 | 80 | 1224                             |       | ND                                |    |      |
| Phthiraptera | <i>Pediculus_humanus</i>     | <a href="#">PHUM376100</a>   |     | 135 | 66  | 423 |     |            |      |     |     | 165 | 141  | 105 | 109 | 253 | 80   |    |                                  |       | ND                                |    |      |
| Crustacea    | <i>Daphnia_pulex</i>         | <a href="#">Dpul\Atp6ap2</a> |     | 46  | 59  | 128 | 126 | 309+61+168 |      |     |     |     | 62   | 81  | 69  | 115 | 76   | 80 |                                  |       | agcacgaacacaTCACCTGActtttagctgtca | 5' | >-80 |
| Ixodida      | <i>Ixodes_scapularis</i>     |                              |     |     |     |     |     |            |      |     |     |     |      |     |     |     |      |    |                                  |       |                                   |    |      |
|              |                              |                              |     |     |     |     |     |            |      |     |     |     |      |     |     |     |      |    |                                  |       |                                   |    |      |
|              |                              |                              |     |     |     |     |     |            |      |     |     |     |      |     |     |     |      |    |                                  |       |                                   |    |      |
