# Supplementary material for: Structural and Comparative Analyses of Insects Suggest the Presence of an Ultra-Conserved Regulatory Element of the Genes Encoding Vacuolar-Type ATPase Subunits and Assembly Factors
Source: MDPI journal article supplement (doi:10.3390/biology12081127), 2023-08-13

| Gene Cluster ID                                                                 | Atp6v1H                                                        |
|---------------------------------------------------------------------------------|----------------------------------------------------------------|
| <b>Drosophila melanogaster gene</b>                                             | <b>VhaSFD (CG17332)</b>                                        |
| FlyBase ID                                                                      | <a href="#">FBgn0027779</a>                                    |
| <b>Predicted function</b>                                                       | <b>V-type ATPase, H<sup>+</sup> transporting, V1 subunit H</b> |
| Cytogenetic map                                                                 | 2L:6A12-36A12                                                  |
| Gene sequence location                                                          | <a href="#">2L:16723138..16727825</a> [-]                      |
| <b>Dmel CLEAR sequence</b>                                                      | <b>TCACAAGAccagTCAGCTGA</b>                                    |
| CLEAR sequence location                                                         | 2L:16727801..16727782                                          |
| <b>FlyBase VhaSFD (CG17332) gene model &amp; CLEAR element (red) positions:</b> |                                                                |

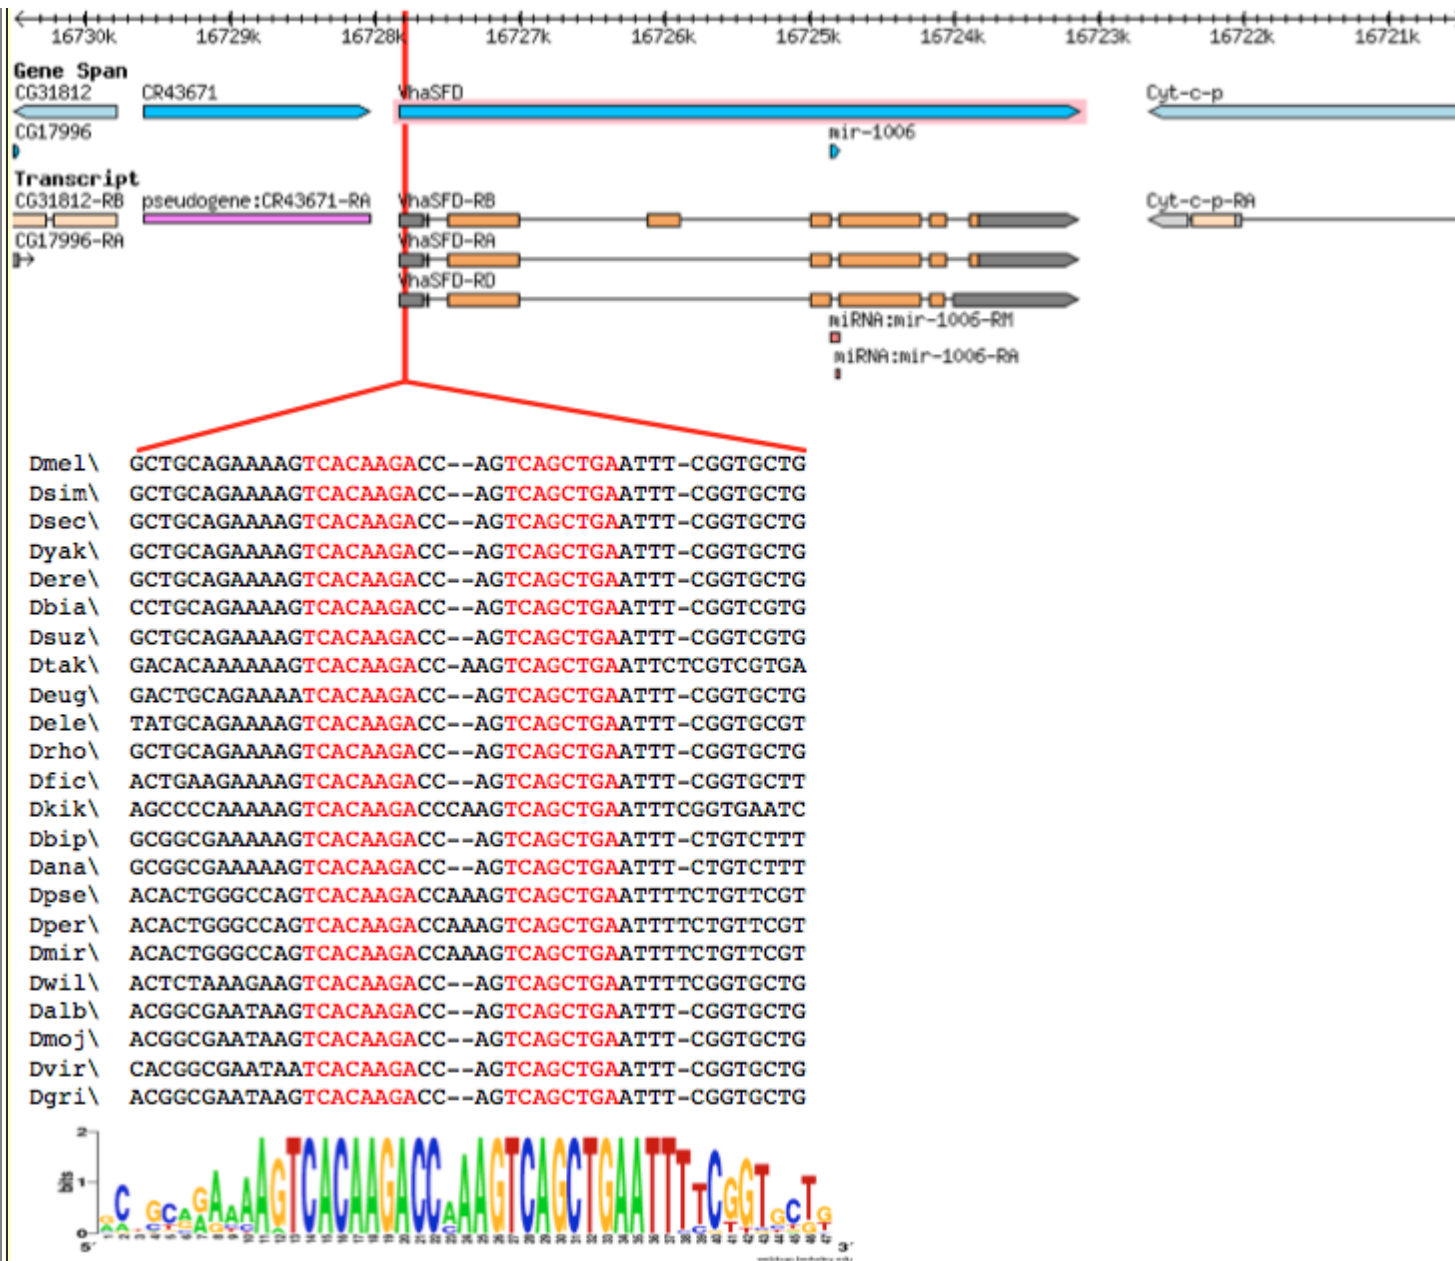

### Atp6v1H (VhaSFD) gene structure comparison:

Key: UTR region, CDS region, intron, alternatively spliced exon



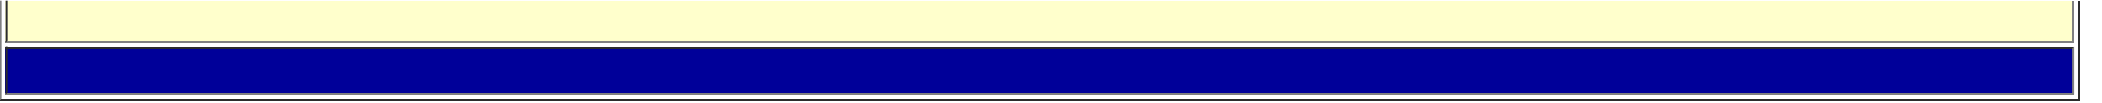

Supplement: s1 [file s1]
